# Supplementary material for: Towards a scientific community consensus on designating Vulnerable Marine Ecosystems from imagery
Source: PeerJ. 2023 Oct 12;11:e16024. doi: 10.7717/peerj.16024 (PMC10576969; doi:10.7717/peerj.16024)
Supplement: Supplemental Information 1 [file peerj-11-16024-s001.xlsx]

## Sheet: Sheet1
original order	All sites	Scleractinian	Octocorals	Pennatulacea	Anitpatharians	Sponges	Anemones	Crinoids	Xenophyophores	Bryozoans	Stylasterids/ Anthoathecata	Brisingids	Ascidians	Zoanthids	Brachiopoda	Hydroidea	Echinoids	Ophiuroids	Chemosynthetic taxa	Bivalvia	Polychaetes plus Serpulidae	Decapoda	Total Taxa	Overal Density	Taxa per m2		Data provided as count, or density?	VME? (Y/N/M)	% hard substrate (bedrock, boulder cobble)	% "intermediate" substrate (pebble, coral rubble, less stable, smaller sized hard substrates)	% soft substrate (mud, silt, sand)	Area of image cm2	Area of image (m2)	Depth (m)	Corrected depth	Camera type (rov, auv, towed cam)	Camera res (HD, SD, 4K, etc)	Geographic Region	Specific Site	Photo Identifier # or code	Station Identifier	Data citation/ref	Data compiled by
1	Image 1	0	0.0422221	0	0.379999	0.337777	0	0	0	0	0	0	0	0	0	0	0	0	0	0	0	0.59111	4	1.35111	0.168888		Count	Y	95	0	5		23.6843	893.713	893.713	ROV	HD	Northeast Pacific, Canada	Dellwood South Seamount (50.58, -130.71)	20180718T000508Z_06961.jpeg	H1690	Du Preez, C., Best, M., Murdock, I., Boschen-Rose, J. & Norgard, T. (2019) Fisheries and Oceans Canada 2018 Northeast Pacific Seamounts Expedition. Unpublished raw data.	Cherisse Du Preez
2	Image 2	0	0.512544	0	0.366103	0.292882	0	0	0	0	0	0.0732205	0	0	0	0	0	0	0	0	0	1.39119	5	2.63594	0.366103		Count	Y	95	0	5		13.6574	887.013	887.013	ROV	HD	Northeast Pacific, Canada	Dellwood South Seamount (50.58, -130.71)	20180718T000508Z_09861.jpeg	H1690	Du Preez, C., Best, M., Murdock, I., Boschen-Rose, J. & Norgard, T. (2019) Fisheries and Oceans Canada 2018 Northeast Pacific Seamounts Expedition. Unpublished raw data.	Cherisse Du Preez
3	Image 3	0	0.12004	0	0.240081	0.240081	0	0	0	0	0	0.12004	0	0	0	0	0	0	0	0	0	2.28077	5	3.00101	0.600201		Count	M	95	5	0		8.33054	886.313	886.313	ROV	HD	Northeast Pacific, Canada	Dellwood South Seamount (50.58, -130.71)	20180718T000508Z_10731.jpeg	H1690	Du Preez, C., Best, M., Murdock, I., Boschen-Rose, J. & Norgard, T. (2019) Fisheries and Oceans Canada 2018 Northeast Pacific Seamounts Expedition. Unpublished raw data.	Cherisse Du Preez
4	Image 4	0	0	0	1.2601	0.493081	0	0	0	0	0	0.0547868	0	0	0	0	0	0	0	0	0	1.04095	4	2.84891	0.219147		Count	Y	95	0	5		18.2526	875.613	875.613	ROV	HD	Northeast Pacific, Canada	Dellwood South Seamount (50.58, -130.71)	20180718T000508Z_15371.jpeg	H1690	Du Preez, C., Best, M., Murdock, I., Boschen-Rose, J. & Norgard, T. (2019) Fisheries and Oceans Canada 2018 Northeast Pacific Seamounts Expedition. Unpublished raw data.	Cherisse Du Preez
5	Image 5	0	0	0	0	0	1.45596	0	0	0	0	0	0	0	0	0	0	1.57729	0	0	0	0	2	3.03326	0.242661		Count	N	0	5	95		8.24196	1458.51	1458.51	ROV	HD	Northeast Pacific, Canada	Dellwood South Seamount (50.58, -130.71)	20180718T162008Z_13341.jpeg	H1690	Du Preez, C., Best, M., Murdock, I., Boschen-Rose, J. & Norgard, T. (2019) Fisheries and Oceans Canada 2018 Northeast Pacific Seamounts Expedition. Unpublished raw data.	Cherisse Du Preez
6	Image 6	0	0.313998	0	0	0	2.04099	0	0	0	0	0	0	0	0	0	0	2.98298	0	0	0	0	3	5.33797	0.470997		Count	N	0	5	95		6.36946	1458.01	1458.01	ROV	HD	Northeast Pacific, Canada	Dellwood South Seamount (50.58, -130.71)	20180718T162008Z_18561.jpeg	H1690	Du Preez, C., Best, M., Murdock, I., Boschen-Rose, J. & Norgard, T. (2019) Fisheries and Oceans Canada 2018 Northeast Pacific Seamounts Expedition. Unpublished raw data.	Cherisse Du Preez
7	Image 7	0	0.397971	0	0	0	2.18884	0	0	0	0	0	0	0	0	0	0	2.38783	0	0	0	0	3	4.97464	0.596957		Count	N	0	0	100		5.02549	1457.91	1457.91	ROV	HD	Northeast Pacific, Canada	Dellwood South Seamount (50.58, -130.71)	20180718T162008Z_19141.jpeg	H1690	Du Preez, C., Best, M., Murdock, I., Boschen-Rose, J. & Norgard, T. (2019) Fisheries and Oceans Canada 2018 Northeast Pacific Seamounts Expedition. Unpublished raw data.	Cherisse Du Preez
8	Image 8	0	0	0	0	0	1.56402	0	0	0	0	0	0	0	0	0	0	2.6067	0	0	0	0	2	4.17071	0.34756		Count	N	0	1	99		5.75441	1457.91	1457.91	ROV	HD	Northeast Pacific, Canada	Dellwood South Seamount (50.58, -130.71)	20180718T162008Z_19721.jpeg	H1690	Du Preez, C., Best, M., Murdock, I., Boschen-Rose, J. & Norgard, T. (2019) Fisheries and Oceans Canada 2018 Northeast Pacific Seamounts Expedition. Unpublished raw data.	Cherisse Du Preez
9	Image 9	0	0	0	0	0	1.94023	0	0	0	0	0	0	0	0	0	0	3.70407	0	0	0	0	2	5.6443	0.352769		Count	N	0	0	100		5.66944	1456.41	1456.41	ROV	HD	Northeast Pacific, Canada	Dellwood South Seamount (50.58, -130.71)	20180718T162008Z_22331.jpeg	H1690	Du Preez, C., Best, M., Murdock, I., Boschen-Rose, J. & Norgard, T. (2019) Fisheries and Oceans Canada 2018 Northeast Pacific Seamounts Expedition. Unpublished raw data.	Cherisse Du Preez
10	Image 10	0	0	0	0	0	0.772488	0	0	0	0	0	0	0	0	0	0	2.89683	0	0	0	0	2	3.66932	0.386244		Count	N	0	5	95		5.17807	1456.11	1456.11	ROV	HD	Northeast Pacific, Canada	Dellwood South Seamount (50.58, -130.71)	20180718T162008Z_25231.jpeg	H1690	Du Preez, C., Best, M., Murdock, I., Boschen-Rose, J. & Norgard, T. (2019) Fisheries and Oceans Canada 2018 Northeast Pacific Seamounts Expedition. Unpublished raw data.	Cherisse Du Preez
11	Image 11	0	0	0	0	0	0	0	0	0	0	0	0	0	0	0	0	4.23489	0	0	0	0	1	4.23489	0.264681		Count	N	0	0	100		3.77814	1451.61	1451.61	ROV	HD	Northeast Pacific, Canada	Dellwood South Seamount (50.58, -130.71)	20180718T163508Z_07541.jpeg	H1690	Du Preez, C., Best, M., Murdock, I., Boschen-Rose, J. & Norgard, T. (2019) Fisheries and Oceans Canada 2018 Northeast Pacific Seamounts Expedition. Unpublished raw data.	Cherisse Du Preez
12	Image 12	0	0	0	0	0	1.79002	0	0	0	0	0	0	0	0	0	0	2.78448	0	0	0	0.198891	3	4.77339	0.596674		Count	N	0	0	100		5.02787	1448.91	1448.91	ROV	HD	Northeast Pacific, Canada	Dellwood South Seamount (50.58, -130.71)	20180718T163508Z_10151.jpeg	H1690	Du Preez, C., Best, M., Murdock, I., Boschen-Rose, J. & Norgard, T. (2019) Fisheries and Oceans Canada 2018 Northeast Pacific Seamounts Expedition. Unpublished raw data.	Cherisse Du Preez
13	Image 13	0	0.263324	0	0	0	1.22885	0	0	0	0	0	0	0	0	0	0	2.80879	0	0	0	0.0877747	4	4.38874	0.351099		Count	N	0	0	100		11.3928	1438.51	1438.51	ROV	HD	Northeast Pacific, Canada	Dellwood South Seamount (50.58, -130.71)	20180718T163508Z_16821.jpeg	H1690	Du Preez, C., Best, M., Murdock, I., Boschen-Rose, J. & Norgard, T. (2019) Fisheries and Oceans Canada 2018 Northeast Pacific Seamounts Expedition. Unpublished raw data.	Cherisse Du Preez
14	Image 14	0	0.0679114	0	0	0	0.543291	0	0	0	0	0	0	0	0	0	0	1.42614	0	0	0	0	3	2.03734	0.203734		Count	N	0	1	99		14.7251	1437.51	1437.51	ROV	HD	Northeast Pacific, Canada	Dellwood South Seamount (50.58, -130.71)	20180718T163508Z_19431.jpeg	H1690	Du Preez, C., Best, M., Murdock, I., Boschen-Rose, J. & Norgard, T. (2019) Fisheries and Oceans Canada 2018 Northeast Pacific Seamounts Expedition. Unpublished raw data.	Cherisse Du Preez
15	Image 15	0	0.222912	0	0.0743039	0	0.0743039	0	0	0	0	0	0	0	0	0	0	0.96595	0	0	0	0	4	1.33747	0.297215		Count	N	0	1	99		13.4582	1413.61	1413.61	ROV	HD	Northeast Pacific, Canada	Dellwood South Seamount (50.58, -130.71)	20180718T165008Z_12471.jpeg	H1690	Du Preez, C., Best, M., Murdock, I., Boschen-Rose, J. & Norgard, T. (2019) Fisheries and Oceans Canada 2018 Northeast Pacific Seamounts Expedition. Unpublished raw data.	Cherisse Du Preez
16	Image 16	0	0	0	0	0	0	0	0	0	0	0	0	0	0	0	0	1.12265	0	0	0	0	1	1.12265	0.0748436		Count	N	0	5	95		13.3612	1376.51	1376.51	ROV	HD	Northeast Pacific, Canada	Dellwood South Seamount (50.58, -130.71)	20180718T172008Z_11021.jpeg	H1690	Du Preez, C., Best, M., Murdock, I., Boschen-Rose, J. & Norgard, T. (2019) Fisheries and Oceans Canada 2018 Northeast Pacific Seamounts Expedition. Unpublished raw data.	Cherisse Du Preez
17	Image 17	0.108087	0	0	0	0	0.324262	0	0	0	0	0	0	0	0	0	0	1.40513	0	0	0	0	3	1.83748	0.324262		Count	N	0	0	100		9.25179	1339.11	1339.11	ROV	HD	Northeast Pacific, Canada	Dellwood South Seamount (50.58, -130.71)	20180718T180508Z_00581.jpeg	H1690	Du Preez, C., Best, M., Murdock, I., Boschen-Rose, J. & Norgard, T. (2019) Fisheries and Oceans Canada 2018 Northeast Pacific Seamounts Expedition. Unpublished raw data.	Cherisse Du Preez
18	Image 18	0	0	0	0	0	0	0	0	0	0	0	0	0	0	0	0	0.962517	0	0	0	0	1	0.962517	0.0802097		Count	N	0	0	100		12.4673	1337.81	1337.81	ROV	HD	Northeast Pacific, Canada	Dellwood South Seamount (50.58, -130.71)	20180718T180508Z_01161.jpeg	H1690	Du Preez, C., Best, M., Murdock, I., Boschen-Rose, J. & Norgard, T. (2019) Fisheries and Oceans Canada 2018 Northeast Pacific Seamounts Expedition. Unpublished raw data.	Cherisse Du Preez
19	Image 19	0	0	0	0	0.135975	0	0	0	0	0	0	0	0	0	0	0	0.611886	0	0	0	0	2	0.74786	0.135975		Count	N	0	0	100		14.7086	1328.11	1328.11	ROV	HD	Northeast Pacific, Canada	Dellwood South Seamount (50.58, -130.71)	20180718T180508Z_14211.jpeg	H1690	Du Preez, C., Best, M., Murdock, I., Boschen-Rose, J. & Norgard, T. (2019) Fisheries and Oceans Canada 2018 Northeast Pacific Seamounts Expedition. Unpublished raw data.	Cherisse Du Preez
20	Image 20	0	0	0	0	0	0	0	0	0	0	0	0	0	0	0	0	0.386969	0	0	0	0	1	0.386969	0.0644948		Count	N	0	0	100		15.5051	1328.41	1328.41	ROV	HD	Northeast Pacific, Canada	Dellwood South Seamount (50.58, -130.71)	20180718T180508Z_14501.jpeg	H1690	Du Preez, C., Best, M., Murdock, I., Boschen-Rose, J. & Norgard, T. (2019) Fisheries and Oceans Canada 2018 Northeast Pacific Seamounts Expedition. Unpublished raw data.	Cherisse Du Preez
21	Image 21	0	0	0	0	0	0	0	0	0	0	0	0	0	0	0	0	0.638376	0	0	0	0	1	0.638376	0.0580341		Count	N	0	0	100		17.2312	1327.11	1327.11	ROV	HD	Northeast Pacific, Canada	Dellwood South Seamount (50.58, -130.71)	20180718T180508Z_15081.jpeg	H1690	Du Preez, C., Best, M., Murdock, I., Boschen-Rose, J. & Norgard, T. (2019) Fisheries and Oceans Canada 2018 Northeast Pacific Seamounts Expedition. Unpublished raw data.	Cherisse Du Preez
22	Image 22	0	0	0	0	0	0.110244	0	0	0	0	0	0	0	0	0	0	1.87415	0	0	0	0	2	1.98439	0.220488		Count	N	0	5	95		9.0708	1318.11	1318.11	ROV	HD	Northeast Pacific, Canada	Dellwood South Seamount (50.58, -130.71)	20180718T180508Z_21171.jpeg	H1690	Du Preez, C., Best, M., Murdock, I., Boschen-Rose, J. & Norgard, T. (2019) Fisheries and Oceans Canada 2018 Northeast Pacific Seamounts Expedition. Unpublished raw data.	Cherisse Du Preez
23	Image 23	0	0	0	0	0	0.145298	0	0	0	0	0	0	0	0	0	0	1.74358	0	0	0	0	2	1.88888	0.290596		Count	N	0	5	95		6.8824	1313.61	1313.61	ROV	HD	Northeast Pacific, Canada	Dellwood South Seamount (50.58, -130.71)	20180718T180508Z_24071.jpeg	H1690	Du Preez, C., Best, M., Murdock, I., Boschen-Rose, J. & Norgard, T. (2019) Fisheries and Oceans Canada 2018 Northeast Pacific Seamounts Expedition. Unpublished raw data.	Cherisse Du Preez
24	Image 24	0.137819	0	0	0	0	0	0	0	0	0	0	0	0	0	0	0	0.964735	0	0	0	0	2	1.10255	0.275639		Count	N	0	15	85		7.25588	1303.61	1303.61	ROV	HD	Northeast Pacific, Canada	Dellwood South Seamount (50.58, -130.71)	20180718T182008Z_02321.jpeg	H1690	Du Preez, C., Best, M., Murdock, I., Boschen-Rose, J. & Norgard, T. (2019) Fisheries and Oceans Canada 2018 Northeast Pacific Seamounts Expedition. Unpublished raw data.	Cherisse Du Preez
25	Image 25	0	0	0	0	0.140105	0	0	0	0	0	0	0	0	0	0	0	0.700523	0	0	0	0	2	0.840628	0.280209		Count	N	0	30	70		7.13752	1302.41	1302.41	ROV	HD	Northeast Pacific, Canada	Dellwood South Seamount (50.58, -130.71)	20180718T182008Z_02611.jpeg	H1690	Du Preez, C., Best, M., Murdock, I., Boschen-Rose, J. & Norgard, T. (2019) Fisheries and Oceans Canada 2018 Northeast Pacific Seamounts Expedition. Unpublished raw data.	Cherisse Du Preez
26	Image 26	0	0	0	0	0	0	0	0	0	0	0	0	0	0	0	0	0.848232	0	0	0	0	1	0.848232	0.106029		Count	N	0	30	70		9.43138	1288.61	1288.61	ROV	HD	Northeast Pacific, Canada	Dellwood South Seamount (50.58, -130.71)	20180718T182008Z_08701.jpeg	H1690	Du Preez, C., Best, M., Murdock, I., Boschen-Rose, J. & Norgard, T. (2019) Fisheries and Oceans Canada 2018 Northeast Pacific Seamounts Expedition. Unpublished raw data.	Cherisse Du Preez
27	Image 27	0	0	0	0	0	0	0	0	0	0	0	0	0	0	0	0	1.17757	0	0	0	0	1	1.17757	0.168225		Count	N	0	60	40		5.94444	1274.11	1274.11	ROV	HD	Northeast Pacific, Canada	Dellwood South Seamount (50.58, -130.71)	20180718T182008Z_14501.jpeg	H1690	Du Preez, C., Best, M., Murdock, I., Boschen-Rose, J. & Norgard, T. (2019) Fisheries and Oceans Canada 2018 Northeast Pacific Seamounts Expedition. Unpublished raw data.	Cherisse Du Preez
28	Image 28	0	0	0	0	0	0	0	0	0	0	0	0	0	0	0	0	1.0765	0	0	0	0	1	1.0765	0.0897087		Count	N	0	70	30		11.1472	1272.81	1272.81	ROV	HD	Northeast Pacific, Canada	Dellwood South Seamount (50.58, -130.71)	20180718T182008Z_15081.jpeg	H1690	Du Preez, C., Best, M., Murdock, I., Boschen-Rose, J. & Norgard, T. (2019) Fisheries and Oceans Canada 2018 Northeast Pacific Seamounts Expedition. Unpublished raw data.	Cherisse Du Preez
29	Image 29	0	0	0	0	0	0	0.894073	0	0	0	0	0.447036	0	0	0	0	0	0	0	0	0	2	1.34111	0.894073		Count	N	75	0	25		2.23695	1174.51	1174.51	ROV	HD	Northeast Pacific, Canada	Dellwood South Seamount (50.58, -130.71)	20180718T200508Z_02611.jpeg	H1690	Du Preez, C., Best, M., Murdock, I., Boschen-Rose, J. & Norgard, T. (2019) Fisheries and Oceans Canada 2018 Northeast Pacific Seamounts Expedition. Unpublished raw data.	Cherisse Du Preez
30	Image 30	0	0.0645022	0	0	0.193507	0	0.258009	0	0	0	0	0.322511	0	0	0	0	0	0	0	0	0.0645022	5	0.903031	0.322511		Count	N	80	0	20		15.5034	1163.51	1163.51	ROV	HD	Northeast Pacific, Canada	Dellwood South Seamount (50.58, -130.71)	20180718T202008Z_23201.jpeg	H1690	Du Preez, C., Best, M., Murdock, I., Boschen-Rose, J. & Norgard, T. (2019) Fisheries and Oceans Canada 2018 Northeast Pacific Seamounts Expedition. Unpublished raw data.	Cherisse Du Preez
31	Image 31	0	0	0	0	0	0	0	0	0	0	0	0	0	0	0	0	0.164202	0	0	0	0	1	0.164202	0.082101		Count	N	0	5	95		12.1801	1160.31	1160.31	ROV	HD	Northeast Pacific, Canada	Dellwood South Seamount (50.58, -130.71)	20180718T202008Z_25811.jpeg	H1690	Du Preez, C., Best, M., Murdock, I., Boschen-Rose, J. & Norgard, T. (2019) Fisheries and Oceans Canada 2018 Northeast Pacific Seamounts Expedition. Unpublished raw data.	Cherisse Du Preez
32	Image 32	0	0	0	0	0.0288482	0	0	0	0	0	0	0	0	0	0	0	0.288482	0	0	0	0	2	0.317331	0.0576965		Count	N	35	0	65		34.6642	1149.11	1149.11	ROV	HD	Northeast Pacific, Canada	Dellwood South Seamount (50.58, -130.71)	20180718T203508Z_04931.jpeg	H1690	Du Preez, C., Best, M., Murdock, I., Boschen-Rose, J. & Norgard, T. (2019) Fisheries and Oceans Canada 2018 Northeast Pacific Seamounts Expedition. Unpublished raw data.	Cherisse Du Preez
33	Image 33	0	0.0584149	0	0	0.11683	0	0.642564	0	0	0	0	0	0	0	0	0	0	0	0	0	0.175245	4	0.993054	0.23366		Count	N	75	0	25		17.1189	1138.31	1138.31	ROV	HD	Northeast Pacific, Canada	Dellwood South Seamount (50.58, -130.71)	20180718T203508Z_08991.jpeg	H1690	Du Preez, C., Best, M., Murdock, I., Boschen-Rose, J. & Norgard, T. (2019) Fisheries and Oceans Canada 2018 Northeast Pacific Seamounts Expedition. Unpublished raw data.	Cherisse Du Preez
34	Image 34	0	0	0	0	0	0	0.1568	0	0	0	0	0.0784	0	0	0	0	0	0	0	0	0.6272	3	0.8624	0.2352		Count	N	75	0	25		12.7551	1130.81	1130.81	ROV	HD	Northeast Pacific, Canada	Dellwood South Seamount (50.58, -130.71)	20180718T203508Z_10731.jpeg	H1690	Du Preez, C., Best, M., Murdock, I., Boschen-Rose, J. & Norgard, T. (2019) Fisheries and Oceans Canada 2018 Northeast Pacific Seamounts Expedition. Unpublished raw data.	Cherisse Du Preez
35	Image 35	0	0	0	0	0.0907648	0.18153	0.272294	0	0	0	0	0	0	0	0	0	0.18153	0	0	0	0.453824	5	1.17994	0.453824		Count	N	90	0	10		11.0175	1130.11	1130.11	ROV	HD	Northeast Pacific, Canada	Dellwood South Seamount (50.58, -130.71)	20180718T203508Z_11311.jpeg	H1690	Du Preez, C., Best, M., Murdock, I., Boschen-Rose, J. & Norgard, T. (2019) Fisheries and Oceans Canada 2018 Northeast Pacific Seamounts Expedition. Unpublished raw data.	Cherisse Du Preez
36	Image 36	0.12374	0.247481	0	0	0	0	0.247481	0	0	0	0	0	0	0	0	0	0.247481	0	0	0	0	4	0.866183	0.494962		Count	N	5	60	35		8.08143	1101.71	1101.71	ROV	HD	Northeast Pacific, Canada	Dellwood South Seamount (50.58, -130.71)	20180718T205008Z_08991.jpeg	H1690	Du Preez, C., Best, M., Murdock, I., Boschen-Rose, J. & Norgard, T. (2019) Fisheries and Oceans Canada 2018 Northeast Pacific Seamounts Expedition. Unpublished raw data.	Cherisse Du Preez
37	Image 37	0	0	0	0	0	0.0822125	0	0	0	0	0	0	0	0	0	0	0	0	0	0	0	1	0.0822125	0.0411063		Count	N	5	5	90		24.3272	1082.51	1082.51	ROV	HD	Northeast Pacific, Canada	Dellwood South Seamount (50.58, -130.71)	20180718T205008Z_24361.jpeg	H1690	Du Preez, C., Best, M., Murdock, I., Boschen-Rose, J. & Norgard, T. (2019) Fisheries and Oceans Canada 2018 Northeast Pacific Seamounts Expedition. Unpublished raw data.	Cherisse Du Preez
39	Image 39	0	0	0.062344	0	0	0.124688	0	0	0	0	0	0	0	0	0	0	0.062344	0	0	0	0.124688	4	0.374064	0.249376		Count	N	3	3	94		16.04	1079.01	1079.01	ROV	HD	Northeast Pacific, Canada	Dellwood South Seamount (50.58, -130.71)	20180718T210508Z_07251.jpeg	H1690	Du Preez, C., Best, M., Murdock, I., Boschen-Rose, J. & Norgard, T. (2019) Fisheries and Oceans Canada 2018 Northeast Pacific Seamounts Expedition. Unpublished raw data.	Cherisse Du Preez
40	Image 40	0	0	0	0	0	0	0	0	0	0	0	0	0	0	0	0	0.0948823	0	0	0	0.0948823	2	0.189765	0.189765		Count	N	7	3	90		10.5394	1076.81	1076.81	ROV	HD	Northeast Pacific, Canada	Dellwood South Seamount (50.58, -130.71)	20180718T210508Z_14791.jpeg	H1690	Du Preez, C., Best, M., Murdock, I., Boschen-Rose, J. & Norgard, T. (2019) Fisheries and Oceans Canada 2018 Northeast Pacific Seamounts Expedition. Unpublished raw data.	Cherisse Du Preez
41	Image 41	0	0.0370806	0	0	0.741612	0	0	0	0	0	0.0741612	0	0	0	0	0	0	0	0	0	0.333725	4	1.18658	0.148322		Count	Y	90	0	10		26.9683	1049.91	1049.91	ROV	HD	Northeast Pacific, Canada	Dellwood South Seamount (50.58, -130.71)	20180718T210508Z_26681.jpeg	H1690	Du Preez, C., Best, M., Murdock, I., Boschen-Rose, J. & Norgard, T. (2019) Fisheries and Oceans Canada 2018 Northeast Pacific Seamounts Expedition. Unpublished raw data.	Cherisse Du Preez
42	Image 42	0	0.0471023	0	0.141307	0.376818	0.0942045	0	0	0	0	0.0471023	0	0	0	0	0	0	0	0	0	0.329716	6	1.03625	0.282614		Count	Y	95	0	5		21.2304	1049.01	1049.01	ROV	HD	Northeast Pacific, Canada	Dellwood South Seamount (50.58, -130.71)	20180718T212008Z_00871.jpeg	H1690	Du Preez, C., Best, M., Murdock, I., Boschen-Rose, J. & Norgard, T. (2019) Fisheries and Oceans Canada 2018 Northeast Pacific Seamounts Expedition. Unpublished raw data.	Cherisse Du Preez
43	Image 43	0	0.0886959	0	0.177392	0	0.399132	0	0	0	0	0	0	0	0	0	0	0	0	0	0	0.044348	4	0.709567	0.177392		Count	M	10	3	87		22.5489	1036.81	1036.81	ROV	HD	Northeast Pacific, Canada	Dellwood South Seamount (50.58, -130.71)	20180718T212008Z_08411.jpeg	H1690	Du Preez, C., Best, M., Murdock, I., Boschen-Rose, J. & Norgard, T. (2019) Fisheries and Oceans Canada 2018 Northeast Pacific Seamounts Expedition. Unpublished raw data.	Cherisse Du Preez
44	Image 44	0	0.0361765	0	0.0361765	0	0.325588	0	0	0	0	0	0	0	0	0	0	0	0	0	0	0.0361765	4	0.434118	0.144706		Count	Y	10	3	87		27.6423	1036.51	1036.51	ROV	HD	Northeast Pacific, Canada	Dellwood South Seamount (50.58, -130.71)	20180718T212008Z_10151.jpeg	H1690	Du Preez, C., Best, M., Murdock, I., Boschen-Rose, J. & Norgard, T. (2019) Fisheries and Oceans Canada 2018 Northeast Pacific Seamounts Expedition. Unpublished raw data.	Cherisse Du Preez
45	Image 45	0	0	0.227456	0	0	0.303275	0	0	0	0	0	0	0	0	0	0	0	0	0	0	0	2	0.53073	0.151637		Count	M	2	3	95		13.1894	1036.91	1036.91	ROV	HD	Northeast Pacific, Canada	Dellwood South Seamount (50.58, -130.71)	20180718T212008Z_15081.jpeg	H1690	Du Preez, C., Best, M., Murdock, I., Boschen-Rose, J. & Norgard, T. (2019) Fisheries and Oceans Canada 2018 Northeast Pacific Seamounts Expedition. Unpublished raw data.	Cherisse Du Preez
46	Image 46	0	0.214075	0	0.267594	0.107038	0.0535189	0	0	0	0	0	0	0	0	0	0	0	0	0	0	0.107038	5	0.749264	0.133797		Count	Y	85	0	15		37.37	1035.11	1035.11	ROV	HD	Northeast Pacific, Canada	Dellwood South Seamount (50.58, -130.71)	20180718T225008Z_02321.jpeg	H1690	Du Preez, C., Best, M., Murdock, I., Boschen-Rose, J. & Norgard, T. (2019) Fisheries and Oceans Canada 2018 Northeast Pacific Seamounts Expedition. Unpublished raw data.	Cherisse Du Preez
47	Image 47	0	0	0	0.431124	0.215562	0	0	0	0	0	0.215562	0	0	0	0	0	0	0	0	0	1.07781	4	1.94006	0.431124		Count	Y	98	0	2		9.27808	947.813	947.813	ROV	HD	Northeast Pacific, Canada	Dellwood South Seamount (50.58, -130.71)	20180718T233508Z_06961.jpeg	H1690	Du Preez, C., Best, M., Murdock, I., Boschen-Rose, J. & Norgard, T. (2019) Fisheries and Oceans Canada 2018 Northeast Pacific Seamounts Expedition. Unpublished raw data.	Cherisse Du Preez
48	Image 48	0	0.166113	0	0.581395	0.415282	0	0	0	0	0	0	0	0	0	0	0	0	0	0	0	1.57807	4	2.74086	0.332226		Count	Y	95	0	5		12.04	927.413	927.413	ROV	HD	Northeast Pacific, Canada	Dellwood South Seamount (50.58, -130.71)	20180718T233508Z_16531.jpeg	H1690	Du Preez, C., Best, M., Murdock, I., Boschen-Rose, J. & Norgard, T. (2019) Fisheries and Oceans Canada 2018 Northeast Pacific Seamounts Expedition. Unpublished raw data.	Cherisse Du Preez
49	Image 49	0	0	0	0.991421	0.413092	0	0	0	0	0	0	0	0	0	0	0	0	0	0	0	1.90022	3	3.30474	0.247855		Count	Y	95	0	5		12.1038	926.613	926.613	ROV	HD	Northeast Pacific, Canada	Dellwood South Seamount (50.58, -130.71)	20180718T233508Z_17111.jpeg	H1690	Du Preez, C., Best, M., Murdock, I., Boschen-Rose, J. & Norgard, T. (2019) Fisheries and Oceans Canada 2018 Northeast Pacific Seamounts Expedition. Unpublished raw data.	Cherisse Du Preez
50	Image 50	0	0	0	3.95987	0.439986	0	0	0	0	0	0	0	0	0	0	0	0	0	0	0	2.63991	3	7.03977	0.659979		Count	Y	100	0	0		4.5456	916.913	916.913	ROV	HD	Northeast Pacific, Canada	Dellwood South Seamount (50.58, -130.71)	20180718T235008Z_13341.jpeg	H1690	Du Preez, C., Best, M., Murdock, I., Boschen-Rose, J. & Norgard, T. (2019) Fisheries and Oceans Canada 2018 Northeast Pacific Seamounts Expedition. Unpublished raw data.	Cherisse Du Preez
51	Image 1	0	0.143746	0	0.0616056	0.616056	0.0821408	0	0	0	0	0.0410704	0	0	0	0	0	0	0	0	0	0.308028	6	1.25265	0.123211		Count	Y	98	0	2		48.6969	929.513	929.513	ROV	HD	Northeast Pacific, Canada	Explorer Seamount (49.06, -130.94)	NA097_H1691_a_20180719_150332.jpeg	H1691	Du Preez, C., Best, M., Murdock, I., Boschen-Rose, J. & Norgard, T. (2019) Fisheries and Oceans Canada 2018 Northeast Pacific Seamounts Expedition. Unpublished raw data.	Cherisse Du Preez
52	Image 2	0	0.122527	0	0.0612636	0.85769	0	0	0	0	0	0.0612636	0	0	0	0	0	0	0	0	0	0.428845	5	1.53159	0.306318		Count	Y	100	0	0		16.3229	928.913	928.913	ROV	HD	Northeast Pacific, Canada	Explorer Seamount (49.06, -130.94)	NA097_H1691_a_20180719_150412.jpeg	H1691	Du Preez, C., Best, M., Murdock, I., Boschen-Rose, J. & Norgard, T. (2019) Fisheries and Oceans Canada 2018 Northeast Pacific Seamounts Expedition. Unpublished raw data.	Cherisse Du Preez
53	Image 3	0	0.0247949	0	0.0743846	0.148769	0	0	0	0	0	0.0495897	0	0	0	0	0	0	0	0	0	0.198359	5	0.495897	0.123974		Count	Y	100	0	0		40.3309	929.813	929.813	ROV	HD	Northeast Pacific, Canada	Explorer Seamount (49.06, -130.94)	NA097_H1691_a_20180719_150652.jpeg	H1691	Du Preez, C., Best, M., Murdock, I., Boschen-Rose, J. & Norgard, T. (2019) Fisheries and Oceans Canada 2018 Northeast Pacific Seamounts Expedition. Unpublished raw data.	Cherisse Du Preez
54	Image 4	0	0	0	0.0747871	0.822658	0.0747871	0	0	0	0	0.0747871	0	0	0	0	0	0	0	0	0	0.897445	5	1.94446	0.373935		Count	Y	98	0	2		13.3713	927.213	927.213	ROV	HD	Northeast Pacific, Canada	Explorer Seamount (49.06, -130.94)	NA097_H1691_b_20180719_151042.jpeg	H1691	Du Preez, C., Best, M., Murdock, I., Boschen-Rose, J. & Norgard, T. (2019) Fisheries and Oceans Canada 2018 Northeast Pacific Seamounts Expedition. Unpublished raw data.	Cherisse Du Preez
55	Image 5	0	0.0612301	0	0.153075	0.795992	0.0918452	0	0	0	0	0.0306151	0	0	0	0	0	0	0	0	0	0.397996	6	1.53075	0.18369		Count	Y	98	0	2		32.6637	925.413	925.413	ROV	HD	Northeast Pacific, Canada	Explorer Seamount (49.06, -130.94)	NA097_H1691_b_20180719_151112.jpeg	H1691	Du Preez, C., Best, M., Murdock, I., Boschen-Rose, J. & Norgard, T. (2019) Fisheries and Oceans Canada 2018 Northeast Pacific Seamounts Expedition. Unpublished raw data.	Cherisse Du Preez
56	Image 6	0	0.0300443	0	0.180266	0.781151	0	0	0	0	0	0	0	0	0	0	0	0	0	0	0	0.63093	4	1.62239	0.120177		Count	Y	100	0	0		33.2842	924.213	924.213	ROV	HD	Northeast Pacific, Canada	Explorer Seamount (49.06, -130.94)	NA097_H1691_b_20180719_151152.jpeg	H1691	Du Preez, C., Best, M., Murdock, I., Boschen-Rose, J. & Norgard, T. (2019) Fisheries and Oceans Canada 2018 Northeast Pacific Seamounts Expedition. Unpublished raw data.	Cherisse Du Preez
57	Image 7	0	0	0	0.140546	0.843276	0	0	0	0	0	0	0	0	0	0	0	0	0	0	0	0.515336	3	1.49916	0.140546		Count	Y	100	0	0		21.3453	918.213	918.213	ROV	HD	Northeast Pacific, Canada	Explorer Seamount (49.06, -130.94)	NA097_H1691_b_20180719_151352.jpeg	H1691	Du Preez, C., Best, M., Murdock, I., Boschen-Rose, J. & Norgard, T. (2019) Fisheries and Oceans Canada 2018 Northeast Pacific Seamounts Expedition. Unpublished raw data.	Cherisse Du Preez
58	Image 8	0	0	0	0.0714298	1.71431	0.0714298	0	0	0	0	0.214289	0	0	0	0	0	0	0	0	0	0.14286	5	2.21432	0.357149		Count	Y	100	0	0		13.9998	908.313	908.313	ROV	HD	Northeast Pacific, Canada	Explorer Seamount (49.06, -130.94)	NA097_H1691_b_20180719_151632.jpeg	H1691	Du Preez, C., Best, M., Murdock, I., Boschen-Rose, J. & Norgard, T. (2019) Fisheries and Oceans Canada 2018 Northeast Pacific Seamounts Expedition. Unpublished raw data.	Cherisse Du Preez
59	Image 9	0	0.04	0	0.02	0.3	0	0	0	0	0	0.02	0	0	0	0	0	0	0	0	0	0.18	5	0.56	0.1		Count	Y	90	0	10		50	900.713	900.713	ROV	HD	Northeast Pacific, Canada	Explorer Seamount (49.06, -130.94)	NA097_H1691_b_20180719_151922.jpeg	H1691	Du Preez, C., Best, M., Murdock, I., Boschen-Rose, J. & Norgard, T. (2019) Fisheries and Oceans Canada 2018 Northeast Pacific Seamounts Expedition. Unpublished raw data.	Cherisse Du Preez
60	Image 10	0	0.02	0	0.08	0.54	0.02	0	0	0	0	0.04	0	0	0	0	0	0	0	0	0	0.4	6	1.1	0.12		Count	Y	95	0	5		50	898.613	898.613	ROV	HD	Northeast Pacific, Canada	Explorer Seamount (49.06, -130.94)	NA097_H1691_b_20180719_151952.jpeg	H1691	Du Preez, C., Best, M., Murdock, I., Boschen-Rose, J. & Norgard, T. (2019) Fisheries and Oceans Canada 2018 Northeast Pacific Seamounts Expedition. Unpublished raw data.	Cherisse Du Preez
61	Image 11	0	0	0	0.04	0.34	0.06	0	0	0	0	0.02	0	0	0	0	0	0	0	0	0	0.42	5	0.88	0.1		Count	Y	98	0	2		50	895.613	895.613	ROV	HD	Northeast Pacific, Canada	Explorer Seamount (49.06, -130.94)	NA097_H1691_b_20180719_152032.jpeg	H1691	Du Preez, C., Best, M., Murdock, I., Boschen-Rose, J. & Norgard, T. (2019) Fisheries and Oceans Canada 2018 Northeast Pacific Seamounts Expedition. Unpublished raw data.	Cherisse Du Preez
62	Image 12	0	0	0	0.06	0.74	0.02	0	0	0	0	0.02	0	0	0	0	0	0	0	0	0	0.28	5	1.12	0.1		Count	Y	100	0	0		50	888.513	888.513	ROV	HD	Northeast Pacific, Canada	Explorer Seamount (49.06, -130.94)	NA097_H1691_b_20180719_152142.jpeg	H1691	Du Preez, C., Best, M., Murdock, I., Boschen-Rose, J. & Norgard, T. (2019) Fisheries and Oceans Canada 2018 Northeast Pacific Seamounts Expedition. Unpublished raw data.	Cherisse Du Preez
63	Image 13	0	0.188175	0	0.282263	0.658613	0.141131	0	0	0	0	0.0470438	0	0	0	0	0	0	0	0	0	0.729178	6	2.0464	0.141131		Count	Y	100	0	0		42.5136	877.813	877.813	ROV	HD	Northeast Pacific, Canada	Explorer Seamount (49.06, -130.94)	NA097_H1691_c_20180719_152522.jpeg	H1691	Du Preez, C., Best, M., Murdock, I., Boschen-Rose, J. & Norgard, T. (2019) Fisheries and Oceans Canada 2018 Northeast Pacific Seamounts Expedition. Unpublished raw data.	Cherisse Du Preez
64	Image 14	0	0.12	0	0.14	0.86	0.02	0	0	0	0	0	0	0	0	0	0	0	0	0	0	0.52	5	1.66	0.1		Count	Y	100	0	0		50	880.413	880.413	ROV	HD	Northeast Pacific, Canada	Explorer Seamount (49.06, -130.94)	NA097_H1691_c_20180719_152642.jpeg	H1691	Du Preez, C., Best, M., Murdock, I., Boschen-Rose, J. & Norgard, T. (2019) Fisheries and Oceans Canada 2018 Northeast Pacific Seamounts Expedition. Unpublished raw data.	Cherisse Du Preez
65	Image 15	0	0.06	0	0.24	0.32	0	0	0	0	0	0.08	0	0	0	0	0	0	0	0	0	0.38	5	1.08	0.1		Count	Y	100	0	0		50	875.513	875.513	ROV	HD	Northeast Pacific, Canada	Explorer Seamount (49.06, -130.94)	NA097_H1691_c_20180719_152822.jpeg	H1691	Du Preez, C., Best, M., Murdock, I., Boschen-Rose, J. & Norgard, T. (2019) Fisheries and Oceans Canada 2018 Northeast Pacific Seamounts Expedition. Unpublished raw data.	Cherisse Du Preez
66	Image 16	0	0.06	0	0.36	0.22	0.06	0	0	0	0	0	0	0	0	0	0	0	0	0	0	0.58	5	1.28	0.1		Count	Y	100	0	0		50	872.713	872.713	ROV	HD	Northeast Pacific, Canada	Explorer Seamount (49.06, -130.94)	NA097_H1691_c_20180719_152912.jpeg	H1691	Du Preez, C., Best, M., Murdock, I., Boschen-Rose, J. & Norgard, T. (2019) Fisheries and Oceans Canada 2018 Northeast Pacific Seamounts Expedition. Unpublished raw data.	Cherisse Du Preez
67	Image 17	0	0.0678168	0	0.406901	1.6276	0.339084	0	0	0	0	0.135634	0	0	0	0	0	0	0	0	0	1.28852	6	3.86556	0.406901		Count	Y	98	0	2		14.7456	871.013	871.013	ROV	HD	Northeast Pacific, Canada	Explorer Seamount (49.06, -130.94)	NA097_H1691_c_20180719_153122.jpeg	H1691	Du Preez, C., Best, M., Murdock, I., Boschen-Rose, J. & Norgard, T. (2019) Fisheries and Oceans Canada 2018 Northeast Pacific Seamounts Expedition. Unpublished raw data.	Cherisse Du Preez
68	Image 18	0	0.08	0	0.08	0.82	0.04	0	0	0	0	0	0	0	0	0	0	0	0	0	0	0.68	5	1.7	0.1		Count	Y	98	0	2		50	856.513	856.513	ROV	HD	Northeast Pacific, Canada	Explorer Seamount (49.06, -130.94)	NA097_H1691_c_20180719_153442.jpeg	H1691	Du Preez, C., Best, M., Murdock, I., Boschen-Rose, J. & Norgard, T. (2019) Fisheries and Oceans Canada 2018 Northeast Pacific Seamounts Expedition. Unpublished raw data.	Cherisse Du Preez
69	Image 19	0	0.14	0	0.04	0.9	0.14	0	0	0	0	0	0	0	0	0	0	0	0	0	0	0.54	5	1.76	0.1		Count	Y	100	0	0		50	849.213	849.213	ROV	HD	Northeast Pacific, Canada	Explorer Seamount (49.06, -130.94)	NA097_H1691_d_20180719_153952.jpeg	H1691	Du Preez, C., Best, M., Murdock, I., Boschen-Rose, J. & Norgard, T. (2019) Fisheries and Oceans Canada 2018 Northeast Pacific Seamounts Expedition. Unpublished raw data.	Cherisse Du Preez
70	Image 20	0	0.16	0	0.1	0.54	0	0	0	0	0	0	0	0	0	0	0	0	0	0	0	0.44	4	1.24	0.08		Count	Y	100	0	0		50	851.113	851.113	ROV	HD	Northeast Pacific, Canada	Explorer Seamount (49.06, -130.94)	NA097_H1691_d_20180719_154702.jpeg	H1691	Du Preez, C., Best, M., Murdock, I., Boschen-Rose, J. & Norgard, T. (2019) Fisheries and Oceans Canada 2018 Northeast Pacific Seamounts Expedition. Unpublished raw data.	Cherisse Du Preez
71	Image 21	0	0.02145	0	0.10725	0.471901	0.02145	0	0	0	0	0	0	0	0	0	0	0	0	0	0	0.514801	5	1.13685	0.10725		Count	Y	98	0	2		46.62	850.813	850.813	ROV	HD	Northeast Pacific, Canada	Explorer Seamount (49.06, -130.94)	NA097_H1691_e_20180719_155722.jpeg	H1691	Du Preez, C., Best, M., Murdock, I., Boschen-Rose, J. & Norgard, T. (2019) Fisheries and Oceans Canada 2018 Northeast Pacific Seamounts Expedition. Unpublished raw data.	Cherisse Du Preez
72	Image 22	0	0.16	0	0.04	0.7	0.04	0	0	0	0	0	0	0	0	0	0	0	0	0	0	0.44	5	1.38	0.1		Count	Y	95	0	5		50	850.513	850.513	ROV	HD	Northeast Pacific, Canada	Explorer Seamount (49.06, -130.94)	NA097_H1691_e_20180719_155842.jpeg	H1691	Du Preez, C., Best, M., Murdock, I., Boschen-Rose, J. & Norgard, T. (2019) Fisheries and Oceans Canada 2018 Northeast Pacific Seamounts Expedition. Unpublished raw data.	Cherisse Du Preez
73	Image 23	0	0.1	0	0.14	0.56	0	0	0	0	0	0	0	0	0	0	0	0	0	0	0	0.76	4	1.56	0.08		Count	Y	100	0	0		50	850.713	850.713	ROV	HD	Northeast Pacific, Canada	Explorer Seamount (49.06, -130.94)	NA097_H1691_e_20180719_160232.jpeg	H1691	Du Preez, C., Best, M., Murdock, I., Boschen-Rose, J. & Norgard, T. (2019) Fisheries and Oceans Canada 2018 Northeast Pacific Seamounts Expedition. Unpublished raw data.	Cherisse Du Preez
74	Image 24	0	0.06	0	0.12	0.66	0.02	0	0	0	0	0	0	0	0	0	0	0	0	0	0	0.78	5	1.64	0.1		Count	Y	100	0	0		50	849.113	849.113	ROV	HD	Northeast Pacific, Canada	Explorer Seamount (49.06, -130.94)	NA097_H1691_f_20180719_161732.jpeg	H1691	Du Preez, C., Best, M., Murdock, I., Boschen-Rose, J. & Norgard, T. (2019) Fisheries and Oceans Canada 2018 Northeast Pacific Seamounts Expedition. Unpublished raw data.	Cherisse Du Preez
75	Image 25	0	0.132921	0	0.0332303	1.69474	0.0996908	0	0	0	0	0	0	0	0	0	0	0	0	0	0	0.465224	5	2.42581	0.166151		Count	Y	100	0	0		30.0931	849.013	849.013	ROV	HD	Northeast Pacific, Canada	Explorer Seamount (49.06, -130.94)	NA097_H1691_f_20180719_161852.jpeg	H1691	Du Preez, C., Best, M., Murdock, I., Boschen-Rose, J. & Norgard, T. (2019) Fisheries and Oceans Canada 2018 Northeast Pacific Seamounts Expedition. Unpublished raw data.	Cherisse Du Preez
76	Image 26	0	0.16	0	0.14	0.38	0.1	0	0	0	0	0.02	0	0	0	0	0	0	0	0	0	0.46	6	1.26	0.12		Count	Y	100	0	0		50	840.713	840.713	ROV	HD	Northeast Pacific, Canada	Explorer Seamount (49.06, -130.94)	NA097_H1691_g_20180719_163832.jpeg	H1691	Du Preez, C., Best, M., Murdock, I., Boschen-Rose, J. & Norgard, T. (2019) Fisheries and Oceans Canada 2018 Northeast Pacific Seamounts Expedition. Unpublished raw data.	Cherisse Du Preez
77	Image 27	0	0.08	0	0.36	0.34	0.12	0	0	0	0	0.02	0	0	0	0	0	0	0	0	0	0.86	6	1.78	0.12		Count	Y	100	0	0		50	839.613	839.613	ROV	HD	Northeast Pacific, Canada	Explorer Seamount (49.06, -130.94)	NA097_H1691_g_20180719_163912.jpeg	H1691	Du Preez, C., Best, M., Murdock, I., Boschen-Rose, J. & Norgard, T. (2019) Fisheries and Oceans Canada 2018 Northeast Pacific Seamounts Expedition. Unpublished raw data.	Cherisse Du Preez
78	Image 28	0	0.1	0	0.1	0.32	0.04	0	0	0	0	0.02	0	0	0	0	0	0	0	0	0	0.74	6	1.32	0.12		Count	Y	90	0	10		50	841.713	841.713	ROV	HD	Northeast Pacific, Canada	Explorer Seamount (49.06, -130.94)	NA097_H1691_h_20180719_164212.jpeg	H1691	Du Preez, C., Best, M., Murdock, I., Boschen-Rose, J. & Norgard, T. (2019) Fisheries and Oceans Canada 2018 Northeast Pacific Seamounts Expedition. Unpublished raw data.	Cherisse Du Preez
79	Image 29	0	0	0	0	0.44	0.06	0	0	0	0	0	0	0	0	0	0	0	0	0	0	0.56	3	1.06	0.06		Count	Y	95	0	5		50	822.313	822.313	ROV	HD	Northeast Pacific, Canada	Explorer Seamount (49.06, -130.94)	NA097_H1691_h_20180719_164842.jpeg	H1691	Du Preez, C., Best, M., Murdock, I., Boschen-Rose, J. & Norgard, T. (2019) Fisheries and Oceans Canada 2018 Northeast Pacific Seamounts Expedition. Unpublished raw data.	Cherisse Du Preez
80	Image 30	0	0.04	0	0	0.74	0.08	0	0	0	0	0.04	0	0	0	0	0	0	0	0	0	0.4	5	1.3	0.1		Count	Y	100	0	0		50	813.113	813.113	ROV	HD	Northeast Pacific, Canada	Explorer Seamount (49.06, -130.94)	NA097_H1691_i_20180719_165732.jpeg	H1691	Du Preez, C., Best, M., Murdock, I., Boschen-Rose, J. & Norgard, T. (2019) Fisheries and Oceans Canada 2018 Northeast Pacific Seamounts Expedition. Unpublished raw data.	Cherisse Du Preez
81	Image 31	0	0.02	0	0	1.08	0	0	0	0	0	0	0	0	0	0	0	0	0	0	0	0.24	3	1.34	0.06		Count	Y	90	0	10		50	813.713	813.713	ROV	HD	Northeast Pacific, Canada	Explorer Seamount (49.06, -130.94)	NA097_H1691_i_20180719_165802.jpeg	H1691	Du Preez, C., Best, M., Murdock, I., Boschen-Rose, J. & Norgard, T. (2019) Fisheries and Oceans Canada 2018 Northeast Pacific Seamounts Expedition. Unpublished raw data.	Cherisse Du Preez
82	Image 32	0	0.16	0	0	0.9	0.02	0	0	0	0	0.02	0	0	0	0	0	0	0	0	0	0.1	5	1.2	0.1		Count	Y	90	0	10		50	812.813	812.813	ROV	HD	Northeast Pacific, Canada	Explorer Seamount (49.06, -130.94)	NA097_H1691_i_20180719_165902.jpeg	H1691	Du Preez, C., Best, M., Murdock, I., Boschen-Rose, J. & Norgard, T. (2019) Fisheries and Oceans Canada 2018 Northeast Pacific Seamounts Expedition. Unpublished raw data.	Cherisse Du Preez
83	Image 33	0	0.12	0	0	0.76	0.02	0	0	0	0	0	0	0	0	0	0	0	0	0	0	0.4	4	1.3	0.08		Count	Y	85	0	15		50	812.713	812.713	ROV	HD	Northeast Pacific, Canada	Explorer Seamount (49.06, -130.94)	NA097_H1691_i_20180719_165932.jpeg	H1691	Du Preez, C., Best, M., Murdock, I., Boschen-Rose, J. & Norgard, T. (2019) Fisheries and Oceans Canada 2018 Northeast Pacific Seamounts Expedition. Unpublished raw data.	Cherisse Du Preez
84	Image 34	0	0.19474	0	0	2.4667	0.0649132	0	0	0	0	0	0	0	0	0	0	0	0	0	0	0.778959	4	3.50531	0.129826		Count	Y	95	0	5		30.8104	796.613	796.613	ROV	HD	Northeast Pacific, Canada	Explorer Seamount (49.06, -130.94)	NA097_H1691_i_20180719_170522.jpeg	H1691	Du Preez, C., Best, M., Murdock, I., Boschen-Rose, J. & Norgard, T. (2019) Fisheries and Oceans Canada 2018 Northeast Pacific Seamounts Expedition. Unpublished raw data.	Cherisse Du Preez
85	Image 35	0	0.06	0	0.02	1.32	0	0	0	0	0	0	0	0	0	0	0	0	0	0	0	0.46	4	1.86	0.08		Count	Y	100	0	0		50	793.913	793.913	ROV	HD	Northeast Pacific, Canada	Explorer Seamount (49.06, -130.94)	NA097_H1691_i_20180719_170612.jpeg	H1691	Du Preez, C., Best, M., Murdock, I., Boschen-Rose, J. & Norgard, T. (2019) Fisheries and Oceans Canada 2018 Northeast Pacific Seamounts Expedition. Unpublished raw data.	Cherisse Du Preez
86	Image 36	0	0.0239267	0	0	0.311048	0	0	0	0	0	0	0	0	0	0	0	0	0	0	0	0.478535	3	0.813509	0.0717802		Count	Y	100	0	0		41.7942	790.413	790.413	ROV	HD	Northeast Pacific, Canada	Explorer Seamount (49.06, -130.94)	NA097_H1691_i_20180719_170702.jpeg	H1691	Du Preez, C., Best, M., Murdock, I., Boschen-Rose, J. & Norgard, T. (2019) Fisheries and Oceans Canada 2018 Northeast Pacific Seamounts Expedition. Unpublished raw data.	Cherisse Du Preez
87	Image 37	0	0.134996	0	0	0.539985	0.0337491	0	0	0	0	0	0	0.134996	0	0	0	0	0	0	0	1.11372	5	1.95745	0.168745		Count	Y	100	0	0		29.6304	785.013	785.013	ROV	HD	Northeast Pacific, Canada	Explorer Seamount (49.06, -130.94)	NA097_H1691_j_20180719_171132.jpeg	H1691	Du Preez, C., Best, M., Murdock, I., Boschen-Rose, J. & Norgard, T. (2019) Fisheries and Oceans Canada 2018 Northeast Pacific Seamounts Expedition. Unpublished raw data.	Cherisse Du Preez
88	Image 38	0	0.0218308	0	0	1.02605	0	0	0	0	0	0	0	0	0	0	0	0	0	0	0	0.720418	3	1.7683	0.0654925		Count	Y	100	0	0		45.8068	779.613	779.613	ROV	HD	Northeast Pacific, Canada	Explorer Seamount (49.06, -130.94)	NA097_H1691_l_20180719_175112.jpeg	H1691	Du Preez, C., Best, M., Murdock, I., Boschen-Rose, J. & Norgard, T. (2019) Fisheries and Oceans Canada 2018 Northeast Pacific Seamounts Expedition. Unpublished raw data.	Cherisse Du Preez
89	Image 39	0	0.1	0	0	0.64	0	0	0	0	0	0	0	0	0	0	0	0	0	0	0	0.82	3	1.56	0.06		Count	Y	100	0	0		50	780.213	780.213	ROV	HD	Northeast Pacific, Canada	Explorer Seamount (49.06, -130.94)	NA097_H1691_m_20180719_175642.jpeg	H1691	Du Preez, C., Best, M., Murdock, I., Boschen-Rose, J. & Norgard, T. (2019) Fisheries and Oceans Canada 2018 Northeast Pacific Seamounts Expedition. Unpublished raw data.	Cherisse Du Preez
90	Image 40	0	0.623478	0	0	6.02696	0.207826	0	0	0	0	0	0	0	0	0	0	0	0	0	0	5.81913	4	12.6774	0.831304		Count	Y	100	0	0		4.81172	780.113	780.113	ROV	HD	Northeast Pacific, Canada	Explorer Seamount (49.06, -130.94)	NA097_H1691_m_20180719_175902.jpeg	H1691	Du Preez, C., Best, M., Murdock, I., Boschen-Rose, J. & Norgard, T. (2019) Fisheries and Oceans Canada 2018 Northeast Pacific Seamounts Expedition. Unpublished raw data.	Cherisse Du Preez
91	Image 41	0	0	0	0	1.89553	0	0	0	0	0	0	0	0	0	0	0	0	0	0	0	1.51643	2	3.41196	0.084246		Count	Y	100	0	0		23.74	786.913	786.913	ROV	HD	Northeast Pacific, Canada	Explorer Seamount (49.06, -130.94)	NA097_H1691_p_20180719_184752.jpeg	H1691	Du Preez, C., Best, M., Murdock, I., Boschen-Rose, J. & Norgard, T. (2019) Fisheries and Oceans Canada 2018 Northeast Pacific Seamounts Expedition. Unpublished raw data.	Cherisse Du Preez
92	Image 42	0	0.130333	0	0	0.825445	0	0	0	0	0	0	0	0	0	0	0	0	0	0	0	0.738556	3	1.69434	0.130333		Count	Y	100	0	0		23.0179	781.013	781.013	ROV	HD	Northeast Pacific, Canada	Explorer Seamount (49.06, -130.94)	NA097_H1691_p_20180719_184922.jpeg	H1691	Du Preez, C., Best, M., Murdock, I., Boschen-Rose, J. & Norgard, T. (2019) Fisheries and Oceans Canada 2018 Northeast Pacific Seamounts Expedition. Unpublished raw data.	Cherisse Du Preez
93	Image 43	0	0.193612	0	0	0.451762	0	0	0	0	0	0	0	0	0	0	0	0	0	0	0	1.09714	3	1.74251	0.193612		Count	Y	100	0	0		15.4949	784.013	784.013	ROV	HD	Northeast Pacific, Canada	Explorer Seamount (49.06, -130.94)	NA097_H1691_p_20180719_185042.jpeg	H1691	Du Preez, C., Best, M., Murdock, I., Boschen-Rose, J. & Norgard, T. (2019) Fisheries and Oceans Canada 2018 Northeast Pacific Seamounts Expedition. Unpublished raw data.	Cherisse Du Preez
94	Image 44	0	0.15975	0	0	0.639002	0	0	0	0	0	0	0	0	0	0	0	0	0	0	0	0.479251	3	1.278	0.119813		Count	Y	100	0	0		25.039	782.913	782.913	ROV	HD	Northeast Pacific, Canada	Explorer Seamount (49.06, -130.94)	NA097_H1691_p_20180719_185412.jpeg	H1691	Du Preez, C., Best, M., Murdock, I., Boschen-Rose, J. & Norgard, T. (2019) Fisheries and Oceans Canada 2018 Northeast Pacific Seamounts Expedition. Unpublished raw data.	Cherisse Du Preez
95	Image 45	0	0	0	0	0	0.0903138	0	0	0	0	0	0	0	0	0	0	0	0	0	0	0.564462	2	0.654775	0.0451569		Count	Y	90	0	10		44.29	885.513	885.513	ROV	HD	Northeast Pacific, Canada	Explorer Seamount (49.06, -130.94)	NA097_H1691_b_20180719_152402.jpeg	H1691	Du Preez, C., Best, M., Murdock, I., Boschen-Rose, J. & Norgard, T. (2019) Fisheries and Oceans Canada 2018 Northeast Pacific Seamounts Expedition. Unpublished raw data.	Cherisse Du Preez
96	Image 46	0	0	0	0	0	0.129232	0	0	0	0	0.0516929	0	0	0	0	0	0	0	0	0	0.284311	3	0.465236	0.0775394		Count	Y	100	0	0		38.69	926.413	926.413	ROV	HD	Northeast Pacific, Canada	Explorer Seamount (49.06, -130.94)	NA097_H1691_b_20180719_151102.jpeg	H1691	Du Preez, C., Best, M., Murdock, I., Boschen-Rose, J. & Norgard, T. (2019) Fisheries and Oceans Canada 2018 Northeast Pacific Seamounts Expedition. Unpublished raw data.	Cherisse Du Preez
97	Image 47	0	0	0	0	0	0.133601	0	0	0	0	0	0	0	0	0	0	0	0	0	0	0.233801	2	0.367401	0.0668003		Count	Y	100	0	0		29.94	820.513	820.513	ROV	HD	Northeast Pacific, Canada	Explorer Seamount (49.06, -130.94)	NA097_H1691_h_20180719_164952.jpeg	H1691	Du Preez, C., Best, M., Murdock, I., Boschen-Rose, J. & Norgard, T. (2019) Fisheries and Oceans Canada 2018 Northeast Pacific Seamounts Expedition. Unpublished raw data.	Cherisse Du Preez
98	Image 49	0	0	0	0	0	0.266312	0	0	0	0	0	0	0	0	0	0	0	0	0	0	2.92943	2	3.19574	0.266312		Count	Y	100	0	0		7.51	805.813	805.813	ROV	HD	Northeast Pacific, Canada	Explorer Seamount (49.06, -130.94)	NA097_H1691_i_20180719_170302.jpeg	H1691	Du Preez, C., Best, M., Murdock, I., Boschen-Rose, J. & Norgard, T. (2019) Fisheries and Oceans Canada 2018 Northeast Pacific Seamounts Expedition. Unpublished raw data.	Cherisse Du Preez
99	Image 50	0	0	0	0	0	0	0	0	0	0	0	0	0	0	0	0	0	0	0	0	4.14747	1	4.14747	0.460829		Count	Y	95	0	5		2.17	842.413	842.413	ROV	HD	Northeast Pacific, Canada	Explorer Seamount (49.06, -130.94)	NA097_H1691_h_20180719_164242.jpeg	H1691	Du Preez, C., Best, M., Murdock, I., Boschen-Rose, J. & Norgard, T. (2019) Fisheries and Oceans Canada 2018 Northeast Pacific Seamounts Expedition. Unpublished raw data.	Cherisse Du Preez
100	Image 1	0	0.295101	0	0	0.098367	0.0491835	0	0	0	0	0	0	0	0	0	0	0	0	0	0	0.639385	4	1.08204	0.196734		Count	Y	75	0	25		20.332	782.113	782.113	ROV	HD	Northeast Pacific, Canada	Hodgkins Seamount (53.51, -136.04)	NA097_H1685_ad_20180711_225915.jpeg	H1690	Du Preez, C., Best, M., Murdock, I., Boschen-Rose, J. & Norgard, T. (2019) Fisheries and Oceans Canada 2018 Northeast Pacific Seamounts Expedition. Unpublished raw data.	Cherisse Du Preez
101	Image 2	0	0	0	0	0.06463	0	0	0	0	0	0	0	0	0	0	0	1.74501	0	0	0	0.19389	3	2.00353	0.19389		Count	N	95	0	5		15.4727	735.713	735.713	ROV	HD	Northeast Pacific, Canada	Hodgkins Seamount (53.51, -136.04)	NA097_H1685_ae_20180711_231345.jpeg	H1690	Du Preez, C., Best, M., Murdock, I., Boschen-Rose, J. & Norgard, T. (2019) Fisheries and Oceans Canada 2018 Northeast Pacific Seamounts Expedition. Unpublished raw data.	Cherisse Du Preez
102	Image 3	0	0.158169	0	0	0	0	0	0	0	0	0	0	0	0	0	0	0.514049	0	0	0	0.0395423	3	0.711761	0.118627		Count	Y	98	0	2		25.2894	730.713	730.713	ROV	HD	Northeast Pacific, Canada	Hodgkins Seamount (53.51, -136.04)	NA097_H1685_af_20180711_231545.jpeg	H1690	Du Preez, C., Best, M., Murdock, I., Boschen-Rose, J. & Norgard, T. (2019) Fisheries and Oceans Canada 2018 Northeast Pacific Seamounts Expedition. Unpublished raw data.	Cherisse Du Preez
103	Image 4	0	0	0	0	0.459124	0	0	0	0	0	0	0	0	0	0	0	0	0	0	0	0.229562	2	0.688685	0.229562		Count	M	98	0	2		8.71225	731.713	731.713	ROV	HD	Northeast Pacific, Canada	Hodgkins Seamount (53.51, -136.04)	NA097_H1685_af_20180711_232605.jpeg	H1690	Du Preez, C., Best, M., Murdock, I., Boschen-Rose, J. & Norgard, T. (2019) Fisheries and Oceans Canada 2018 Northeast Pacific Seamounts Expedition. Unpublished raw data.	Cherisse Du Preez
104	Image 5	0	0	0	0	0.476744	0	0	0	0	0	0	0	0	0	0	0	1.00116	0	0	0.42907	0.0953488	4	2.00232	0.190698		Count	M	95	0	5		20.9756	693.813	693.813	ROV	HD	Northeast Pacific, Canada	Hodgkins Seamount (53.51, -136.04)	NA097_H1685_ah_20180711_235855.jpeg	H1690	Du Preez, C., Best, M., Murdock, I., Boschen-Rose, J. & Norgard, T. (2019) Fisheries and Oceans Canada 2018 Northeast Pacific Seamounts Expedition. Unpublished raw data.	Cherisse Du Preez
105	Image 6	0	0.0664605	0	0	0	0	0	0	0	0	0	0	0	0	0	0	2.02705	0	0	0	0	2	2.09351	0.0664605		Count	N	95	0	5		30.0931	667.513	667.513	ROV	HD	Northeast Pacific, Canada	Hodgkins Seamount (53.51, -136.04)	NA097_H1685_ai_20180712_000425.jpeg	H1690	Du Preez, C., Best, M., Murdock, I., Boschen-Rose, J. & Norgard, T. (2019) Fisheries and Oceans Canada 2018 Northeast Pacific Seamounts Expedition. Unpublished raw data.	Cherisse Du Preez
106	Image 7	0	0	0	0	0	0	0	0	0	0	0	0	0	0	0	0	31.2961	0	0	3.58601	0	2	34.8821	0.326001		Count	N	92	0	8		6.13495	661.913	661.913	ROV	HD	Northeast Pacific, Canada	Hodgkins Seamount (53.51, -136.04)	NA097_H1685_ai_20180712_000555.jpeg	H1690	Du Preez, C., Best, M., Murdock, I., Boschen-Rose, J. & Norgard, T. (2019) Fisheries and Oceans Canada 2018 Northeast Pacific Seamounts Expedition. Unpublished raw data.	Cherisse Du Preez
107	Image 8	0	0	0	0	0.297629	0	0	0	0	0	0	0	0	0	0	0	7.14311	0	0	0	0	2	7.44074	0.297629		Count	N	100	0	0		6.71977	602.613	602.613	ROV	HD	Northeast Pacific, Canada	Hodgkins Seamount (53.51, -136.04)	NA097_H1685_aj_20180712_002035.jpeg	H1690	Du Preez, C., Best, M., Murdock, I., Boschen-Rose, J. & Norgard, T. (2019) Fisheries and Oceans Canada 2018 Northeast Pacific Seamounts Expedition. Unpublished raw data.	Cherisse Du Preez
108	Image 9	0	0	0	0	0.110402	0	0	0	0	0	0	0	0	0	0	0	15.8979	0	0	0	0	2	16.0083	0.220804		Count	N	100	0	0		9.05782	598.113	598.113	ROV	HD	Northeast Pacific, Canada	Hodgkins Seamount (53.51, -136.04)	NA097_H1685_ak_20180712_004355.jpeg	H1690	Du Preez, C., Best, M., Murdock, I., Boschen-Rose, J. & Norgard, T. (2019) Fisheries and Oceans Canada 2018 Northeast Pacific Seamounts Expedition. Unpublished raw data.	Cherisse Du Preez
109	Image 10	0	0	0	0	0.360191	0	0	0	0	0	0	0	0	0	0	0	19.4503	0	0	0	0	2	19.8105	0.180096		Count	M	100	0	0		11.1052	600.113	600.113	ROV	HD	Northeast Pacific, Canada	Hodgkins Seamount (53.51, -136.04)	NA097_H1685_al_20180712_004555.jpeg	H1690	Du Preez, C., Best, M., Murdock, I., Boschen-Rose, J. & Norgard, T. (2019) Fisheries and Oceans Canada 2018 Northeast Pacific Seamounts Expedition. Unpublished raw data.	Cherisse Du Preez
110	Image 11	0	0	0	0	0.348489	0	0	0	0	0	0	0	0	0	0	0	18.1911	0	0	0	0	2	18.5396	0.139396		Count	M	98	0	2		14.3476	599.313	599.313	ROV	HD	Northeast Pacific, Canada	Hodgkins Seamount (53.51, -136.04)	NA097_H1685_am_20180712_010836.jpeg	H1690	Du Preez, C., Best, M., Murdock, I., Boschen-Rose, J. & Norgard, T. (2019) Fisheries and Oceans Canada 2018 Northeast Pacific Seamounts Expedition. Unpublished raw data.	Cherisse Du Preez
111	Image 12	0	0	0	0	0.389042	0	0	0	0	0	0	0	0	0	0	0	10.1151	0	0	0	0	2	10.5041	0.129681		Count	N	98	0	2		15.4225	580.913	580.913	ROV	HD	Northeast Pacific, Canada	Hodgkins Seamount (53.51, -136.04)	NA097_H1685_ao_20180712_013216.jpeg	H1690	Du Preez, C., Best, M., Murdock, I., Boschen-Rose, J. & Norgard, T. (2019) Fisheries and Oceans Canada 2018 Northeast Pacific Seamounts Expedition. Unpublished raw data.	Cherisse Du Preez
112	Image 13	0	0	0	0	0.212177	0	0	0	0	0	0	0	0	0	0	0	6.93111	0	0	0	0	2	7.14328	0.0471504		Count	M	98	0	2		42.4175	580.913	580.913	ROV	HD	Northeast Pacific, Canada	Hodgkins Seamount (53.51, -136.04)	NA097_H1685_ao_20180712_013616.jpeg	H1690	Du Preez, C., Best, M., Murdock, I., Boschen-Rose, J. & Norgard, T. (2019) Fisheries and Oceans Canada 2018 Northeast Pacific Seamounts Expedition. Unpublished raw data.	Cherisse Du Preez
113	Image 14	0	0	0	0	0.499114	0	0	0	0	0	0	0	0	0	0	0	5.56155	0	0	0	0	2	6.06067	0.142604		Count	N	80	0	20		14.0249	1412.01	1412.01	ROV	HD	Northeast Pacific, Canada	Hodgkins Seamount (53.51, -136.04)	NA097_H1685_b_20180711_155834.jpeg	H1690	Du Preez, C., Best, M., Murdock, I., Boschen-Rose, J. & Norgard, T. (2019) Fisheries and Oceans Canada 2018 Northeast Pacific Seamounts Expedition. Unpublished raw data.	Cherisse Du Preez
114	Image 15	0	0	0	0	0	0	0	0	0	0	0	0	0	0	0	0	1.98294	0	0	0	0	1	1.98294	0.0381334		Count	N	85	0	15		26.2237	1397.31	1397.31	ROV	HD	Northeast Pacific, Canada	Hodgkins Seamount (53.51, -136.04)	NA097_H1685_c_20180711_160024.jpeg	H1690	Du Preez, C., Best, M., Murdock, I., Boschen-Rose, J. & Norgard, T. (2019) Fisheries and Oceans Canada 2018 Northeast Pacific Seamounts Expedition. Unpublished raw data.	Cherisse Du Preez
115	Image 16	0	0.0582028	0	0	0	0	0	0	0	0	0	0	0	0	0	0	2.21171	0	0	0	0	2	2.26991	0.116406		Count	N	95	0	5		17.1813	1390.51	1390.51	ROV	HD	Northeast Pacific, Canada	Hodgkins Seamount (53.51, -136.04)	NA097_H1685_c_20180711_160104.jpeg	H1690	Du Preez, C., Best, M., Murdock, I., Boschen-Rose, J. & Norgard, T. (2019) Fisheries and Oceans Canada 2018 Northeast Pacific Seamounts Expedition. Unpublished raw data.	Cherisse Du Preez
116	Image 17	0	0	0	0	1.52285	0	0	0	0	0	0	0	0	0	0	0	2.09391	0	0	0	0.190356	3	3.80712	0.571067		Count	N	70	0	30		5.25332	1343.91	1343.91	ROV	HD	Northeast Pacific, Canada	Hodgkins Seamount (53.51, -136.04)	NA097_H1685_d_20180711_161534.jpeg	H1690	Du Preez, C., Best, M., Murdock, I., Boschen-Rose, J. & Norgard, T. (2019) Fisheries and Oceans Canada 2018 Northeast Pacific Seamounts Expedition. Unpublished raw data.	Cherisse Du Preez
117	Image 18	0	0.0871436	0	0	0.203335	0	0	0	0	0	0	0	0	0	0	0	3.31146	0	0	0	0.0290479	4	3.63098	0.116192		Count	N	80	0	20		34.4259	1330.01	1330.01	ROV	HD	Northeast Pacific, Canada	Hodgkins Seamount (53.51, -136.04)	NA097_H1685_d_20180711_161954.jpeg	H1690	Du Preez, C., Best, M., Murdock, I., Boschen-Rose, J. & Norgard, T. (2019) Fisheries and Oceans Canada 2018 Northeast Pacific Seamounts Expedition. Unpublished raw data.	Cherisse Du Preez
118	Image 19	0	0.142782	0	0	1.14225	0	0	0	0	0	0	0	0	0	0	0	5.99683	0	0	0	0	3	7.28186	0.428345		Count	N	70	0	30		7.0037	1322.41	1322.41	ROV	HD	Northeast Pacific, Canada	Hodgkins Seamount (53.51, -136.04)	NA097_H1685_d_20180711_162334.jpeg	H1690	Du Preez, C., Best, M., Murdock, I., Boschen-Rose, J. & Norgard, T. (2019) Fisheries and Oceans Canada 2018 Northeast Pacific Seamounts Expedition. Unpublished raw data.	Cherisse Du Preez
119	Image 20	0	0.21274	0	0	0.21274	0	0	0	0	0	0	0	0	0	0	0	2.97836	0	0	0	0	3	3.40384	0.31911		Count	N	85	0	15		9.40115	1284.61	1284.61	ROV	HD	Northeast Pacific, Canada	Hodgkins Seamount (53.51, -136.04)	NA097_H1685_e_20180711_163224.jpeg	H1690	Du Preez, C., Best, M., Murdock, I., Boschen-Rose, J. & Norgard, T. (2019) Fisheries and Oceans Canada 2018 Northeast Pacific Seamounts Expedition. Unpublished raw data.	Cherisse Du Preez
120	Image 21	0	0.135634	0	0.0678168	0.135634	0	0	0	0	0	0	0	0	0	0	0	0.406901	0	0	0	0	4	0.745985	0.271267		Count	N	90	0	10		14.7456	1282.41	1282.41	ROV	HD	Northeast Pacific, Canada	Hodgkins Seamount (53.51, -136.04)	NA097_H1685_g_20180711_170324.jpeg	H1690	Du Preez, C., Best, M., Murdock, I., Boschen-Rose, J. & Norgard, T. (2019) Fisheries and Oceans Canada 2018 Northeast Pacific Seamounts Expedition. Unpublished raw data.	Cherisse Du Preez
121	Image 22	0	0.082101	0	0	0.246303	0	0	0	0	0	0	0	0	0	0	0	1.31362	0	0	0	0	3	1.64202	0.246303		Count	N	95	0	5		12.1801	1268.81	1268.81	ROV	HD	Northeast Pacific, Canada	Hodgkins Seamount (53.51, -136.04)	NA097_H1685_g_20180711_170824.jpeg	H1690	Du Preez, C., Best, M., Murdock, I., Boschen-Rose, J. & Norgard, T. (2019) Fisheries and Oceans Canada 2018 Northeast Pacific Seamounts Expedition. Unpublished raw data.	Cherisse Du Preez
122	Image 23	0	0.306773	0	0.306773	0.92032	0	0	0	0	0	0	0	0	0	0	0	12.5777	0	0	0	0.306773	5	14.4184	1.53387		Count	N	95	0	5		3.25973	1255.71	1255.71	ROV	HD	Northeast Pacific, Canada	Hodgkins Seamount (53.51, -136.04)	NA097_H1685_g_20180711_171244.jpeg	H1690	Du Preez, C., Best, M., Murdock, I., Boschen-Rose, J. & Norgard, T. (2019) Fisheries and Oceans Canada 2018 Northeast Pacific Seamounts Expedition. Unpublished raw data.	Cherisse Du Preez
123	Image 24	0	0	0	0	1.21113	0	0.201856	0	0	0	0	0	0	0	0	0	2.42227	0	0	0	0	3	3.83526	0.605567		Count	N	75	0	25		4.95403	1218.81	1218.81	ROV	HD	Northeast Pacific, Canada	Hodgkins Seamount (53.51, -136.04)	NA097_H1685_i_20180711_173305.jpeg	H1690	Du Preez, C., Best, M., Murdock, I., Boschen-Rose, J. & Norgard, T. (2019) Fisheries and Oceans Canada 2018 Northeast Pacific Seamounts Expedition. Unpublished raw data.	Cherisse Du Preez
124	Image 25	0	0	0	0	2.48805	0	0	0	0	0	0	0	0	0	0	0	8.08617	0	0	0	0	2	10.5742	1.24403		Count	N	30	20	50		1.60768	1220.91	1220.91	ROV	HD	Northeast Pacific, Canada	Hodgkins Seamount (53.51, -136.04)	NA097_H1685_i_20180711_173355.jpeg	H1690	Du Preez, C., Best, M., Murdock, I., Boschen-Rose, J. & Norgard, T. (2019) Fisheries and Oceans Canada 2018 Northeast Pacific Seamounts Expedition. Unpublished raw data.	Cherisse Du Preez
125	Image 26	0	0	0	0	0	0	0	0	0	0	0	0	0	0	0	0	1.05101	0	0	0	0.300289	2	1.3513	0.300289		Count	N	45	0	55		6.66025	1203.01	1203.01	ROV	HD	Northeast Pacific, Canada	Hodgkins Seamount (53.51, -136.04)	NA097_H1685_j_20180711_174735.jpeg	H1690	Du Preez, C., Best, M., Murdock, I., Boschen-Rose, J. & Norgard, T. (2019) Fisheries and Oceans Canada 2018 Northeast Pacific Seamounts Expedition. Unpublished raw data.	Cherisse Du Preez
126	Image 27	0	0.142992	0	0	0.285984	0	0	0	0	0	0	0	0	0	0	0	1.00094	0	0	0	0	3	1.42992	0.428976		Count	N	85	0	15		6.9934	1200.01	1200.01	ROV	HD	Northeast Pacific, Canada	Hodgkins Seamount (53.51, -136.04)	NA097_H1685_j_20180711_174825.jpeg	H1690	Du Preez, C., Best, M., Murdock, I., Boschen-Rose, J. & Norgard, T. (2019) Fisheries and Oceans Canada 2018 Northeast Pacific Seamounts Expedition. Unpublished raw data.	Cherisse Du Preez
127	Image 28	0	0	0	0	0.538507	0	0	0	0	0	0	0	0	0	0	0	0.807761	0	0	0	0	2	1.34627	0.179502		Count	N	80	0	20		11.1419	1161.81	1161.81	ROV	HD	Northeast Pacific, Canada	Hodgkins Seamount (53.51, -136.04)	NA097_H1685_k_20180711_180335.jpeg	H1690	Du Preez, C., Best, M., Murdock, I., Boschen-Rose, J. & Norgard, T. (2019) Fisheries and Oceans Canada 2018 Northeast Pacific Seamounts Expedition. Unpublished raw data.	Cherisse Du Preez
128	Image 29	0	0	0	0	0.179754	0	0	0	0	0	0	0	0	0	0	0	0.539263	0	0	0	0	2	0.719018	0.179754		Count	N	25	10	65		11.1263	1150.71	1150.71	ROV	HD	Northeast Pacific, Canada	Hodgkins Seamount (53.51, -136.04)	NA097_H1685_k_20180711_180745.jpeg	H1690	Du Preez, C., Best, M., Murdock, I., Boschen-Rose, J. & Norgard, T. (2019) Fisheries and Oceans Canada 2018 Northeast Pacific Seamounts Expedition. Unpublished raw data.	Cherisse Du Preez
129	Image 30	0	0	0	0	2.56429	0	0.512858	0	0	0	0	0	0	0	0	0	3.59	0	0	0	0	3	6.66715	1.53857		Count	N	10	20	70		1.94986	1116.51	1116.51	ROV	HD	Northeast Pacific, Canada	Hodgkins Seamount (53.51, -136.04)	NA097_H1685_m_20180711_183945.jpeg	H1690	Du Preez, C., Best, M., Murdock, I., Boschen-Rose, J. & Norgard, T. (2019) Fisheries and Oceans Canada 2018 Northeast Pacific Seamounts Expedition. Unpublished raw data.	Cherisse Du Preez
130	Image 31	0	0	0	0	0.550791	0	0	0	0	0	0	0	0	0	0	0	4.40633	0	0	0	0	2	4.95712	1.10158		Count	N	10	50	40		1.81557	1116.71	1116.71	ROV	HD	Northeast Pacific, Canada	Hodgkins Seamount (53.51, -136.04)	NA097_H1685_n_20180711_184515.jpeg	H1690	Du Preez, C., Best, M., Murdock, I., Boschen-Rose, J. & Norgard, T. (2019) Fisheries and Oceans Canada 2018 Northeast Pacific Seamounts Expedition. Unpublished raw data.	Cherisse Du Preez
131	Image 32	0	0	0	0	0.830796	0	0	0	0	0	0	0	0	0	0	0	2.90779	0	0	0	0.415398	3	4.15398	1.24619		Count	N	5	70	25		2.40733	1110.41	1110.41	ROV	HD	Northeast Pacific, Canada	Hodgkins Seamount (53.51, -136.04)	NA097_H1685_n_20180711_184925.jpeg	H1690	Du Preez, C., Best, M., Murdock, I., Boschen-Rose, J. & Norgard, T. (2019) Fisheries and Oceans Canada 2018 Northeast Pacific Seamounts Expedition. Unpublished raw data.	Cherisse Du Preez
132	Image 33	0	0	0	0	2.03513	0	0.407026	0	0	0	0	0	0	0	0	0	4.47729	0	0	0	0	3	6.91945	1.22108		Count	N	10	75	15		2.45684	1098.21	1098.21	ROV	HD	Northeast Pacific, Canada	Hodgkins Seamount (53.51, -136.04)	NA097_H1685_n_20180711_185555.jpeg	H1690	Du Preez, C., Best, M., Murdock, I., Boschen-Rose, J. & Norgard, T. (2019) Fisheries and Oceans Canada 2018 Northeast Pacific Seamounts Expedition. Unpublished raw data.	Cherisse Du Preez
133	Image 34	0	0	0	0	3.66409	0.407121	0	0	0	0	0.407121	0	0	0	0	0	0	0	0	0	0	3	4.47833	1.22136		Count	N	15	75	10		2.45627	1090.51	1090.51	ROV	HD	Northeast Pacific, Canada	Hodgkins Seamount (53.51, -136.04)	NA097_H1685_n_20180711_185835.jpeg	H1690	Du Preez, C., Best, M., Murdock, I., Boschen-Rose, J. & Norgard, T. (2019) Fisheries and Oceans Canada 2018 Northeast Pacific Seamounts Expedition. Unpublished raw data.	Cherisse Du Preez
134	Image 35	0	0	0	0	0.531851	0	0	0	0	0	0	0	0	0	0	0	0	0	0	0	0	1	0.531851	0.132963		Count	N	30	60	10		7.52091	1085.81	1085.81	ROV	HD	Northeast Pacific, Canada	Hodgkins Seamount (53.51, -136.04)	NA097_H1685_o_20180711_185955.jpeg	H1685	Du Preez, C., Best, M., Murdock, I., Boschen-Rose, J. & Norgard, T. (2019) Fisheries and Oceans Canada 2018 Northeast Pacific Seamounts Expedition. Unpublished raw data.	Cherisse Du Preez
135	Image 36	0	0	0	0	0.326145	0	0	0	0	0	0.163072	0	0	0	0	0	0.489217	0	0	0	0	3	0.978434	0.489217		Count	N	30	60	10		6.13225	1061.21	1061.21	ROV	HD	Northeast Pacific, Canada	Hodgkins Seamount (53.51, -136.04)	NA097_H1685_o_20180711_190705.jpeg	H1685	Du Preez, C., Best, M., Murdock, I., Boschen-Rose, J. & Norgard, T. (2019) Fisheries and Oceans Canada 2018 Northeast Pacific Seamounts Expedition. Unpublished raw data.	Cherisse Du Preez
136	Image 37	0	0	0	0	0	0	0.12374	0	0	0	0.12374	0	0	0	0	0	0.866183	0	0	0	0	3	1.11366	0.371221		Count	N	85	10	5		8.08143	1060.91	1060.91	ROV	HD	Northeast Pacific, Canada	Hodgkins Seamount (53.51, -136.04)	NA097_H1685_o_20180711_190715.jpeg	H1685	Du Preez, C., Best, M., Murdock, I., Boschen-Rose, J. & Norgard, T. (2019) Fisheries and Oceans Canada 2018 Northeast Pacific Seamounts Expedition. Unpublished raw data.	Cherisse Du Preez
137	Image 38	0	0	0	0	0	0	0.147911	0	0	0	0.295823	0	0	0	0	0	0.443734	0	0	0	0	3	0.887469	0.443734		Count	N	25	70	5		6.7608	1057.81	1057.81	ROV	HD	Northeast Pacific, Canada	Hodgkins Seamount (53.51, -136.04)	NA097_H1685_o_20180711_190745.jpeg	H1685	Du Preez, C., Best, M., Murdock, I., Boschen-Rose, J. & Norgard, T. (2019) Fisheries and Oceans Canada 2018 Northeast Pacific Seamounts Expedition. Unpublished raw data.	Cherisse Du Preez
138	Image 39	0	0	0	0	0.984701	0	0.328234	0	0	0	0	0	0.656467	0	0.328234	0	2.9541	0	0	0	0	5	5.25174	1.64117		Count	N	40	15	45		3.04661	1045.31	1045.31	ROV	HD	Northeast Pacific, Canada	Hodgkins Seamount (53.51, -136.04)	NA097_H1685_o_20180711_191205.jpeg	H1685	Du Preez, C., Best, M., Murdock, I., Boschen-Rose, J. & Norgard, T. (2019) Fisheries and Oceans Canada 2018 Northeast Pacific Seamounts Expedition. Unpublished raw data.	Cherisse Du Preez
139	Image 40	0	0	0	0	0.210749	0.210749	0.421498	0	0	0	0	0	0	0	0	0	0.632247	0	0	0	0	4	1.47524	0.842996		Count	N	35	20	45		4.74498	1043.11	1043.11	ROV	HD	Northeast Pacific, Canada	Hodgkins Seamount (53.51, -136.04)	NA097_H1685_o_20180711_191255.jpeg	H1685	Du Preez, C., Best, M., Murdock, I., Boschen-Rose, J. & Norgard, T. (2019) Fisheries and Oceans Canada 2018 Northeast Pacific Seamounts Expedition. Unpublished raw data.	Cherisse Du Preez
140	Image 41	0	0	0	0	0	0.264582	0.529163	0	0	0	0	0	0	0	0	0	0.264582	0	0	0	0	3	1.05833	0.793745		Count	N	20	65	15		3.77955	1027.41	1027.41	ROV	HD	Northeast Pacific, Canada	Hodgkins Seamount (53.51, -136.04)	NA097_H1685_p_20180711_191705.jpeg	H1685	Du Preez, C., Best, M., Murdock, I., Boschen-Rose, J. & Norgard, T. (2019) Fisheries and Oceans Canada 2018 Northeast Pacific Seamounts Expedition. Unpublished raw data.	Cherisse Du Preez
141	Image 42	0	0	0	0	0.0747917	0.224375	0.149583	0	0	0	0.0747917	0	0	0	0	0	0	0	0	0	0	4	0.523542	0.299167		Count	M	15	75	10		13.3705	1000.11	1000.11	ROV	HD	Northeast Pacific, Canada	Hodgkins Seamount (53.51, -136.04)	NA097_H1685_p_20180711_192425.jpeg	H1685	Du Preez, C., Best, M., Murdock, I., Boschen-Rose, J. & Norgard, T. (2019) Fisheries and Oceans Canada 2018 Northeast Pacific Seamounts Expedition. Unpublished raw data.	Cherisse Du Preez
142	Image 43	0	0.14611	0	0	0.0730552	0	0.14611	0	0	0	0.0730552	0	0	0	0	0	0	0	0	0	0.511386	5	0.949717	0.365276		Count	N	80	15	5		13.6883	942.013	942.013	ROV	HD	Northeast Pacific, Canada	Hodgkins Seamount (53.51, -136.04)	NA097_H1685_t_20180711_202015.jpeg	H1685	Du Preez, C., Best, M., Murdock, I., Boschen-Rose, J. & Norgard, T. (2019) Fisheries and Oceans Canada 2018 Northeast Pacific Seamounts Expedition. Unpublished raw data.	Cherisse Du Preez
143	Image 44	0	0.0764063	0	0	0.0382031	0	0	0	0	0	0.191016	0	0	0	0	0	0	0	0	0	0.305625	4	0.61125	0.152813		Count	M	80	10	10		26.1759	912.913	912.913	ROV	HD	Northeast Pacific, Canada	Hodgkins Seamount (53.51, -136.04)	NA097_H1685_v_20180711_205845.jpeg	H1685	Du Preez, C., Best, M., Murdock, I., Boschen-Rose, J. & Norgard, T. (2019) Fisheries and Oceans Canada 2018 Northeast Pacific Seamounts Expedition. Unpublished raw data.	Cherisse Du Preez
144	Image 45	0	0.229983	0	0.114991	0	0	0	0	0	0	0.114991	0	0	0	0	0	1.03492	0	0	0	0.459965	5	1.95485	0.574956		Count	N	80	10	10		8.69631	900.013	900.013	ROV	HD	Northeast Pacific, Canada	Hodgkins Seamount (53.51, -136.04)	NA097_H1685_y_20180711_213555.jpeg	H1685	Du Preez, C., Best, M., Murdock, I., Boschen-Rose, J. & Norgard, T. (2019) Fisheries and Oceans Canada 2018 Northeast Pacific Seamounts Expedition. Unpublished raw data.	Cherisse Du Preez
145	Image 46	0	0.494458	0	0	0	0.123614	0.123614	0	0	0	0	0	0	0	0	0	1.85422	0	0	0	0.988915	5	3.58482	0.618072		Count	M	80	10	10		8.08967	899.713	899.713	ROV	HD	Northeast Pacific, Canada	Hodgkins Seamount (53.51, -136.04)	NA097_H1685_y_20180711_213715.jpeg	H1685	Du Preez, C., Best, M., Murdock, I., Boschen-Rose, J. & Norgard, T. (2019) Fisheries and Oceans Canada 2018 Northeast Pacific Seamounts Expedition. Unpublished raw data.	Cherisse Du Preez
146	Image 47	0	0.315802	0	0.157901	0.315802	0	0	0	0	0	0	0	0.157901	0	0	0	7.26344	0	0	0	1.10531	6	9.31615	0.947405		Count	N	80	5	15		6.33309	884.513	884.513	ROV	HD	Northeast Pacific, Canada	Hodgkins Seamount (53.51, -136.04)	NA097_H1685_y_20180711_214225.jpeg	H1685	Du Preez, C., Best, M., Murdock, I., Boschen-Rose, J. & Norgard, T. (2019) Fisheries and Oceans Canada 2018 Northeast Pacific Seamounts Expedition. Unpublished raw data.	Cherisse Du Preez
147	Image 48	0	0.833802	0	0	0	0	0	0	0	0	0	0	0	0	0	0	1.42938	0	0	0	0.476459	3	2.73964	0.357344		Count	M	85	8	7		8.39527	882.413	882.413	ROV	HD	Northeast Pacific, Canada	Hodgkins Seamount (53.51, -136.04)	NA097_H1685_y_20180711_214255.jpeg	H1685	Du Preez, C., Best, M., Murdock, I., Boschen-Rose, J. & Norgard, T. (2019) Fisheries and Oceans Canada 2018 Northeast Pacific Seamounts Expedition. Unpublished raw data.	Cherisse Du Preez
148	Image 49	0	0.814571	0	0	0	0.203643	0	0	0	0	0	0	0	0	0	0	0.203643	0	0	0	0.814571	4	2.03643	0.407285		Count	M	85	5	10		9.82112	870.113	870.113	ROV	HD	Northeast Pacific, Canada	Hodgkins Seamount (53.51, -136.04)	NA097_H1685_z_20180711_214625.jpeg	H1685	Du Preez, C., Best, M., Murdock, I., Boschen-Rose, J. & Norgard, T. (2019) Fisheries and Oceans Canada 2018 Northeast Pacific Seamounts Expedition. Unpublished raw data.	Cherisse Du Preez
149	Image 50	0	0.23104	0	0.0462079	0.138624	0.0462079	0	0	0	0	0.0462079	0	0	0	0	0	2.03315	0	0	0	0.462079	7	3.00351	0.323455		Count	M	90	0	10		21.6413	845.713	845.713	ROV	HD	Northeast Pacific, Canada	Hodgkins Seamount (53.51, -136.04)	NA097_H1685_z_20180711_215115.jpeg	H1685	Du Preez, C., Best, M., Murdock, I., Boschen-Rose, J. & Norgard, T. (2019) Fisheries and Oceans Canada 2018 Northeast Pacific Seamounts Expedition. Unpublished raw data.	Cherisse Du Preez
150	Image 1	0	0	0	0	0	0	0	0	0	0	0	0	0	0	0	0.374047	0	0	0	0	0	1	0.374047	0.0220028		Count	N	5	5	90		45.4488	531.113	531.113	ROV	HD	Northeast Pacific, Canada	Dellwood Seamount (50.75, -130.90)	NA097_H1682_ac_20180708_004919.jpeg	H1682	Du Preez, C., Best, M., Murdock, I., Boschen-Rose, J. & Norgard, T. (2019) Fisheries and Oceans Canada 2018 Northeast Pacific Seamounts Expedition. Unpublished raw data.	Cherisse Du Preez
151	Image 2	0	0.263375	0	0.131688	0.131688	0.395063	0	0	0	0	0	0	0	0	0	0	0	0	0	0	0.131688	5	1.0535	0.658438		Count	M	10	30	60		7.59373	832.613	832.613	ROV	HD	Northeast Pacific, Canada	Dellwood Seamount (50.75, -130.90)	NA097_H1682_b_20180707_180338.jpeg	H1682	Du Preez, C., Best, M., Murdock, I., Boschen-Rose, J. & Norgard, T. (2019) Fisheries and Oceans Canada 2018 Northeast Pacific Seamounts Expedition. Unpublished raw data.	Cherisse Du Preez
152	Image 3	0	0	0	0	2.31096	0.0796884	0	0	0	0	0	0	0	0	0	0	0	0	0	0	0	2	2.39065	0.159377		Count	Y	85	0	15		12.5489	838.013	838.013	ROV	HD	Northeast Pacific, Canada	Dellwood Seamount (50.75, -130.90)	NA097_H1682_j_20180707_201139.jpeg	H1682	Du Preez, C., Best, M., Murdock, I., Boschen-Rose, J. & Norgard, T. (2019) Fisheries and Oceans Canada 2018 Northeast Pacific Seamounts Expedition. Unpublished raw data.	Cherisse Du Preez
154	Image 5	0	6.24783	0	0.694203	1.38841	0.231401	0	0	0	0	0	0	0	0	0	0	0	0	0	0	0	4	8.56184	0.925604		Count	Y	25	25	50		4.3215	812.213	812.213	ROV	HD	Northeast Pacific, Canada	Dellwood Seamount (50.75, -130.90)	NA097_H1682_o_20180707_212129.jpeg	H1682	Du Preez, C., Best, M., Murdock, I., Boschen-Rose, J. & Norgard, T. (2019) Fisheries and Oceans Canada 2018 Northeast Pacific Seamounts Expedition. Unpublished raw data.	Cherisse Du Preez
155	Image 6	0	0.60783	0	1.82349	0.709135	0	0	0	0	0	0	0	0	0	0	0	0	0	0	0	0.101305	4	3.24176	0.40522		Count	Y	30	25	45		9.87119	810.813	810.813	ROV	HD	Northeast Pacific, Canada	Dellwood Seamount (50.75, -130.90)	NA097_H1682_o_20180707_212339.jpeg	H1682	Du Preez, C., Best, M., Murdock, I., Boschen-Rose, J. & Norgard, T. (2019) Fisheries and Oceans Canada 2018 Northeast Pacific Seamounts Expedition. Unpublished raw data.	Cherisse Du Preez
156	Image 7	0	0.251679	0	0	0	0	0	0	0	0	0	0	0	0	0	0	0	0	0	0	0	1	0.251679	0.12584		Count	N	7	33	60		7.94663	810.613	810.613	ROV	HD	Northeast Pacific, Canada	Dellwood Seamount (50.75, -130.90)	NA097_H1682_o_20180707_212519.jpeg	H1682	Du Preez, C., Best, M., Murdock, I., Boschen-Rose, J. & Norgard, T. (2019) Fisheries and Oceans Canada 2018 Northeast Pacific Seamounts Expedition. Unpublished raw data.	Cherisse Du Preez
157	Image 8	0	9.34822	0	0.267092	0.890307	0.267092	0	0	0	0	0	0	0	0	0	0	0	0	0	0	0.0890307	5	10.8617	0.445153		Count	Y	80	5	15		11.2321	806.013	806.013	ROV	HD	Northeast Pacific, Canada	Dellwood Seamount (50.75, -130.90)	NA097_H1682_r_20180707_220419.jpeg	H1682	Du Preez, C., Best, M., Murdock, I., Boschen-Rose, J. & Norgard, T. (2019) Fisheries and Oceans Canada 2018 Northeast Pacific Seamounts Expedition. Unpublished raw data.	Cherisse Du Preez
158	Image 9	0	0.934458	0	1.19403	0.0519144	0.155743	0	0	0	0	0	0	0	0	0	0	0	0	0	0	0.0519144	5	2.38806	0.259572		Count	Y	55	10	35		19.2625	804.313	804.313	ROV	HD	Northeast Pacific, Canada	Dellwood Seamount (50.75, -130.90)	NA097_H1682_r_20180707_220509.jpeg	H1682	Du Preez, C., Best, M., Murdock, I., Boschen-Rose, J. & Norgard, T. (2019) Fisheries and Oceans Canada 2018 Northeast Pacific Seamounts Expedition. Unpublished raw data.	Cherisse Du Preez
159	Image 10	0	0	0	0.0327007	0	0	0	0	0	0	0	0	0	0	0	0	0	0	0	0	0	1	0.0327007	0.0327007		Count	N	5	15	80		30.5804	798.913	798.913	ROV	HD	Northeast Pacific, Canada	Dellwood Seamount (50.75, -130.90)	NA097_H1682_s_20180707_221519.jpeg	H1682	Du Preez, C., Best, M., Murdock, I., Boschen-Rose, J. & Norgard, T. (2019) Fisheries and Oceans Canada 2018 Northeast Pacific Seamounts Expedition. Unpublished raw data.	Cherisse Du Preez
160	Image 11	0	0.458116	0	0.152705	0	0	0	0	0	0	0	0	0	0	0	0	0	0	0	0	0	2	0.610821	0.305411		Count	N	5	15	80		6.54856	785.113	785.113	ROV	HD	Northeast Pacific, Canada	Dellwood Seamount (50.75, -130.90)	NA097_H1682_s_20180707_222909.jpeg	H1682	Du Preez, C., Best, M., Murdock, I., Boschen-Rose, J. & Norgard, T. (2019) Fisheries and Oceans Canada 2018 Northeast Pacific Seamounts Expedition. Unpublished raw data.	Cherisse Du Preez
161	Image 12	0	0.192363	0	0.128242	0.128242	0	0	0	0	0	0	0	0	0	0	0	0	0	0	0	0.064121	4	0.512968	0.256484		Count	N	10	15	75		15.5955	773.413	773.413	ROV	HD	Northeast Pacific, Canada	Dellwood Seamount (50.75, -130.90)	NA097_H1682_t_20180707_223309.jpeg	H1682	Du Preez, C., Best, M., Murdock, I., Boschen-Rose, J. & Norgard, T. (2019) Fisheries and Oceans Canada 2018 Northeast Pacific Seamounts Expedition. Unpublished raw data.	Cherisse Du Preez
162	Image 13	0	1.39188	0	0.242065	0.0605164	0	0	0	0	0	0	0	0	0	0	0	0	0	0	0	0.0302582	4	1.72472	0.121033		Count	Y	50	5	45		33.0489	761.113	761.113	ROV	HD	Northeast Pacific, Canada	Dellwood Seamount (50.75, -130.90)	NA097_H1682_t_20180707_223509.jpeg	H1682	Du Preez, C., Best, M., Murdock, I., Boschen-Rose, J. & Norgard, T. (2019) Fisheries and Oceans Canada 2018 Northeast Pacific Seamounts Expedition. Unpublished raw data.	Cherisse Du Preez
163	Image 14	0	0.442426	0	0.0340328	0.0340328	0.0340328	0	0	0	0	0	0	0	0	0	0	0	0	0	0	0	4	0.544525	0.136131		Count	M	25	10	65		29.3834	750.313	750.313	ROV	HD	Northeast Pacific, Canada	Dellwood Seamount (50.75, -130.90)	NA097_H1682_t_20180707_224009.jpeg	H1682	Du Preez, C., Best, M., Murdock, I., Boschen-Rose, J. & Norgard, T. (2019) Fisheries and Oceans Canada 2018 Northeast Pacific Seamounts Expedition. Unpublished raw data.	Cherisse Du Preez
164	Image 15	0	0.204197	0	0	0	0	0	0	0	0	0	0	0	0	0	0	0	0	0	0	0	1	0.204197	0.0340328		Count	N	10	10	80		29.3834	751.513	751.513	ROV	HD	Northeast Pacific, Canada	Dellwood Seamount (50.75, -130.90)	NA097_H1682_t_20180707_224029.jpeg	H1682	Du Preez, C., Best, M., Murdock, I., Boschen-Rose, J. & Norgard, T. (2019) Fisheries and Oceans Canada 2018 Northeast Pacific Seamounts Expedition. Unpublished raw data.	Cherisse Du Preez
165	Image 16	0	0.0641606	0.0641606	0	0	0	0	0	0	0	0	0	0	0	0	0	0	0	0	0	0	2	0.128321	0.128321		Count	N	5	10	85		15.5859	726.413	726.413	ROV	HD	Northeast Pacific, Canada	Dellwood Seamount (50.75, -130.90)	NA097_H1682_u_20180707_224639.jpeg	H1682	Du Preez, C., Best, M., Murdock, I., Boschen-Rose, J. & Norgard, T. (2019) Fisheries and Oceans Canada 2018 Northeast Pacific Seamounts Expedition. Unpublished raw data.	Cherisse Du Preez
166	Image 17	0	0	0	0	0.0536182	0	0	0	0	0	0	0	0	0	0	0	0	0	0	0	0	1	0.0536182	0.0536182		Count	N	15	15	70		18.6504	717.013	717.013	ROV	HD	Northeast Pacific, Canada	Dellwood Seamount (50.75, -130.90)	NA097_H1682_u_20180707_225009.jpeg	H1682	Du Preez, C., Best, M., Murdock, I., Boschen-Rose, J. & Norgard, T. (2019) Fisheries and Oceans Canada 2018 Northeast Pacific Seamounts Expedition. Unpublished raw data.	Cherisse Du Preez
167	Image 18	0	0.0659621	0	0	0	0	0.395773	0	0	0	0	0	0	0	0	0	0	0	0	0	0	2	0.461735	0.131924		Count	N	85	0	15		15.1602	690.913	690.913	ROV	HD	Northeast Pacific, Canada	Dellwood Seamount (50.75, -130.90)	NA097_H1682_u_20180707_225439.jpeg	H1682	Du Preez, C., Best, M., Murdock, I., Boschen-Rose, J. & Norgard, T. (2019) Fisheries and Oceans Canada 2018 Northeast Pacific Seamounts Expedition. Unpublished raw data.	Cherisse Du Preez
168	Image 19	0	0.273543	0	0	0.0210418	0	0	0	0	0	0	0	0	0	0	0	0.315627	0	0	0	0	3	0.610212	0.0631254		Count	N	90	0	10		47.5245	614.813	614.813	ROV	HD	Northeast Pacific, Canada	Dellwood Seamount (50.75, -130.90)	NA097_H1682_w_20180707_231519.jpeg	H1682	Du Preez, C., Best, M., Murdock, I., Boschen-Rose, J. & Norgard, T. (2019) Fisheries and Oceans Canada 2018 Northeast Pacific Seamounts Expedition. Unpublished raw data.	Cherisse Du Preez
169	Image 20	0	0	0	0	0	0	0.0462003	0	0	0	0	0	0	0	0	0	0	0	0	0	0	1	0.0462003	0.0231002		Count	N	25	10	65		43.2898	615.013	615.013	ROV	HD	Northeast Pacific, Canada	Dellwood Seamount (50.75, -130.90)	NA097_H1682_w_20180707_231919.jpeg	H1682	Du Preez, C., Best, M., Murdock, I., Boschen-Rose, J. & Norgard, T. (2019) Fisheries and Oceans Canada 2018 Northeast Pacific Seamounts Expedition. Unpublished raw data.	Cherisse Du Preez
170	Image 21	0	0	0	0	0	0	0	0	0	0	0	0	0	0	0	0	0.637061	0	0	0	0	1	0.637061	0.0276983		Count	N	80	0	20		36.1033	596.513	596.513	ROV	HD	Northeast Pacific, Canada	Dellwood Seamount (50.75, -130.90)	NA097_H1682_x_20180707_233309.jpeg	H1682	Du Preez, C., Best, M., Murdock, I., Boschen-Rose, J. & Norgard, T. (2019) Fisheries and Oceans Canada 2018 Northeast Pacific Seamounts Expedition. Unpublished raw data.	Cherisse Du Preez
171	Image 22	0	0.025334	0	0	0.025334	0	0	0	0	0	0	0	0	0	0	0.0760021	8.23356	0	0	0	0	4	8.36023	0.101336		Count	N	75	0	25		39.4726	577.113	577.113	ROV	HD	Northeast Pacific, Canada	Dellwood Seamount (50.75, -130.90)	NA097_H1682_x_20180707_233709.jpeg	H1682	Du Preez, C., Best, M., Murdock, I., Boschen-Rose, J. & Norgard, T. (2019) Fisheries and Oceans Canada 2018 Northeast Pacific Seamounts Expedition. Unpublished raw data.	Cherisse Du Preez
172	Image 23	0	0.0465915	0	0	0	0	0.0232958	0	0	0	0	0	0	0	0	0.0232958	5.94042	0	0	0	0	4	6.0336	0.093183		Count	N	75	0	25		42.9263	562.113	562.113	ROV	HD	Northeast Pacific, Canada	Dellwood Seamount (50.75, -130.90)	NA097_H1682_x_20180707_234049.jpeg	H1682	Du Preez, C., Best, M., Murdock, I., Boschen-Rose, J. & Norgard, T. (2019) Fisheries and Oceans Canada 2018 Northeast Pacific Seamounts Expedition. Unpublished raw data.	Cherisse Du Preez
173	Image 24	0	0.0276983	0.0276983	0	0	0	0	0	0	0	0	0	0	0	0	0	6.20442	0	0	0	0	3	6.25982	0.0830949		Count	N	70	0	30		36.1033	557.513	557.513	ROV	HD	Northeast Pacific, Canada	Dellwood Seamount (50.75, -130.90)	NA097_H1682_x_20180707_234139.jpeg	H1682	Du Preez, C., Best, M., Murdock, I., Boschen-Rose, J. & Norgard, T. (2019) Fisheries and Oceans Canada 2018 Northeast Pacific Seamounts Expedition. Unpublished raw data.	Cherisse Du Preez
174	Image 25	0	0.314077	0	0	0	0	0	0	0	0	0	0	0.0314077	0	0	0.0314077	8.79416	0	0	0	0	4	9.17105	0.125631		Count	N	80	5	15		31.8393	556.613	556.613	ROV	HD	Northeast Pacific, Canada	Dellwood Seamount (50.75, -130.90)	NA097_H1682_x_20180707_234349.jpeg	H1682	Du Preez, C., Best, M., Murdock, I., Boschen-Rose, J. & Norgard, T. (2019) Fisheries and Oceans Canada 2018 Northeast Pacific Seamounts Expedition. Unpublished raw data.	Cherisse Du Preez
175	Image 26	0	0	0	0	0	0	0.0397654	0	0	0	0	0	0	0	0	0	0	0	0	39.7654	0	2	39.8052	0.0795309		Count	N	2	3	95		25.1475	599.013	599.013	ROV	HD	Northeast Pacific, Canada	Dellwood Seamount (50.75, -130.90)	NA097_H1683_aa_20180708_212646.jpeg	H1683	Du Preez, C., Best, M., Murdock, I., Boschen-Rose, J. & Norgard, T. (2019) Fisheries and Oceans Canada 2018 Northeast Pacific Seamounts Expedition. Unpublished raw data.	Cherisse Du Preez
176	Image 27	0	0.04	0	0	0	0	0	0	0	0	0	0	0	0	0	0	0.22	0	0	20	0	3	20.26	0.06		Count	N	5	30	65		50	598.213	598.213	ROV	HD	Northeast Pacific, Canada	Dellwood Seamount (50.75, -130.90)	NA097_H1683_aa_20180708_213146.jpeg	H1683	Du Preez, C., Best, M., Murdock, I., Boschen-Rose, J. & Norgard, T. (2019) Fisheries and Oceans Canada 2018 Northeast Pacific Seamounts Expedition. Unpublished raw data.	Cherisse Du Preez
177	Image 28	0	0.04	0	0	0	0	0	0	0	0	0	0	0	0	0	0	0	0	0	2.6	0	2	2.64	0.04		Count	N	0	15	85		50	599.613	599.613	ROV	HD	Northeast Pacific, Canada	Dellwood Seamount (50.75, -130.90)	NA097_H1683_aa_20180708_213306.jpeg	H1683	Du Preez, C., Best, M., Murdock, I., Boschen-Rose, J. & Norgard, T. (2019) Fisheries and Oceans Canada 2018 Northeast Pacific Seamounts Expedition. Unpublished raw data.	Cherisse Du Preez
178	Image 29	0	0.1	0	0	0	0	0	0	0	0	0	0	0	0	0	0	5.08	0	0	0	0	2	5.18	0.04		Count	N	40	5	55		50	609.113	609.113	ROV	HD	Northeast Pacific, Canada	Dellwood Seamount (50.75, -130.90)	NA097_H1683_ab_20180708_213846.jpeg	H1683	Du Preez, C., Best, M., Murdock, I., Boschen-Rose, J. & Norgard, T. (2019) Fisheries and Oceans Canada 2018 Northeast Pacific Seamounts Expedition. Unpublished raw data.	Cherisse Du Preez
179	Image 30	0	0.0944248	0	0	0.0472124	0	0	0	0	0	0	0	0.141637	0	0	0	9.06478	0	0	0	0	4	9.34805	0.18885		Count	N	50	15	35		21.1809	619.913	619.913	ROV	HD	Northeast Pacific, Canada	Dellwood Seamount (50.75, -130.90)	NA097_H1683_ad_20180708_221446.jpeg	H1683	Du Preez, C., Best, M., Murdock, I., Boschen-Rose, J. & Norgard, T. (2019) Fisheries and Oceans Canada 2018 Northeast Pacific Seamounts Expedition. Unpublished raw data.	Cherisse Du Preez
180	Image 31	0	0	0	0	0.0736287	0	0	0	0	0	0	0	0	0	0	0	9.27722	0	0	0	0	2	9.35085	0.147257		Count	N	50	10	40		13.5817	609.013	609.013	ROV	HD	Northeast Pacific, Canada	Dellwood Seamount (50.75, -130.90)	NA097_H1683_ag_20180708_230156.jpeg	H1683	Du Preez, C., Best, M., Murdock, I., Boschen-Rose, J. & Norgard, T. (2019) Fisheries and Oceans Canada 2018 Northeast Pacific Seamounts Expedition. Unpublished raw data.	Cherisse Du Preez
181	Image 32	0	0.616611	0	0	0	0	0.0880873	0	0	0	0	0	0	0	0	0	7.39933	0	0	0	0	3	8.10403	0.264262		Count	N	55	5	40		11.3524	609.513	609.513	ROV	HD	Northeast Pacific, Canada	Dellwood Seamount (50.75, -130.90)	NA097_H1683_ah_20180708_230936.jpeg	H1683	Du Preez, C., Best, M., Murdock, I., Boschen-Rose, J. & Norgard, T. (2019) Fisheries and Oceans Canada 2018 Northeast Pacific Seamounts Expedition. Unpublished raw data.	Cherisse Du Preez
182	Image 33	0	0.0503992	0	0	0	0	0	0	0	0	0	0	0	0	0	0	3.62874	0	0	0	0	2	3.67914	0.100798		Count	N	60	10	30		19.8416	613.113	613.113	ROV	HD	Northeast Pacific, Canada	Dellwood Seamount (50.75, -130.90)	NA097_H1683_ah_20180708_231916.jpeg	H1683	Du Preez, C., Best, M., Murdock, I., Boschen-Rose, J. & Norgard, T. (2019) Fisheries and Oceans Canada 2018 Northeast Pacific Seamounts Expedition. Unpublished raw data.	Cherisse Du Preez
183	Image 34	0	0.06	0	0	0	0.02	0	0	0	0	0	0	0	0	0	0	2.72	0	0	0	0	3	2.8	0.06		Count	N	45	20	35		50	626.613	626.613	ROV	HD	Northeast Pacific, Canada	Dellwood Seamount (50.75, -130.90)	NA097_H1683_c_20180708_153625.jpeg	H1683	Du Preez, C., Best, M., Murdock, I., Boschen-Rose, J. & Norgard, T. (2019) Fisheries and Oceans Canada 2018 Northeast Pacific Seamounts Expedition. Unpublished raw data.	Cherisse Du Preez
184	Image 35	0	0.130803	0	0	0.261606	0	0.392408	0	0	0	0	0	0	0	0	0	1.70044	0	0	0	0	4	2.48525	0.523211		Count	N	80	5	15		7.6451	643.413	643.413	ROV	HD	Northeast Pacific, Canada	Dellwood Seamount (50.75, -130.90)	NA097_H1683_f_20180708_162055.jpeg	H1683	Du Preez, C., Best, M., Murdock, I., Boschen-Rose, J. & Norgard, T. (2019) Fisheries and Oceans Canada 2018 Northeast Pacific Seamounts Expedition. Unpublished raw data.	Cherisse Du Preez
185	Image 36	0	0.326955	0	0	0.0817387	0	0	0	0	0	0	0	0	0	0	0	10.1356	0	0	0	0	3	10.5443	0.245216		Count	N	50	10	40		12.2341	650.413	650.413	ROV	HD	Northeast Pacific, Canada	Dellwood Seamount (50.75, -130.90)	NA097_H1683_g_20180708_162415.jpeg	H1683	Du Preez, C., Best, M., Murdock, I., Boschen-Rose, J. & Norgard, T. (2019) Fisheries and Oceans Canada 2018 Northeast Pacific Seamounts Expedition. Unpublished raw data.	Cherisse Du Preez
186	Image 37	0	0.079584	0	0	0.079584	0	0.318336	0	0	0	0	0	0	0	0	0	0.716256	0	0	0	0	4	1.19376	0.318336		Count	N	40	20	40		12.5653	650.113	650.113	ROV	HD	Northeast Pacific, Canada	Dellwood Seamount (50.75, -130.90)	NA097_H1683_g_20180708_162455.jpeg	H1683	Du Preez, C., Best, M., Murdock, I., Boschen-Rose, J. & Norgard, T. (2019) Fisheries and Oceans Canada 2018 Northeast Pacific Seamounts Expedition. Unpublished raw data.	Cherisse Du Preez
187	Image 38	0	0	0	0	0	0	0.141578	0	0	0	0	0	0	0	0	0	11.8926	0	0	0	0	2	12.0342	0.283157		Count	N	60	10	30		7.06322	647.913	647.913	ROV	HD	Northeast Pacific, Canada	Dellwood Seamount (50.75, -130.90)	NA097_H1683_g_20180708_163415.jpeg	H1683	Du Preez, C., Best, M., Murdock, I., Boschen-Rose, J. & Norgard, T. (2019) Fisheries and Oceans Canada 2018 Northeast Pacific Seamounts Expedition. Unpublished raw data.	Cherisse Du Preez
188	Image 39	0	0.144308	0	0	0	0	0	0	0	0	0	0	0	0	0	0	2.74185	0	0	0	0	2	2.88616	0.288616		Count	N	40	5	55		6.92963	638.313	638.313	ROV	HD	Northeast Pacific, Canada	Dellwood Seamount (50.75, -130.90)	NA097_H1683_g_20180708_163745.jpeg	H1683	Du Preez, C., Best, M., Murdock, I., Boschen-Rose, J. & Norgard, T. (2019) Fisheries and Oceans Canada 2018 Northeast Pacific Seamounts Expedition. Unpublished raw data.	Cherisse Du Preez
189	Image 40	0	0.136079	0	0	0	0	0	0	0	0	0	0	0	0	0	0	0.544316	0	0	0	0	2	0.680395	0.272158		Count	N	25	15	60		7.34867	635.313	635.313	ROV	HD	Northeast Pacific, Canada	Dellwood Seamount (50.75, -130.90)	NA097_H1683_h_20180708_163905.jpeg	H1683	Du Preez, C., Best, M., Murdock, I., Boschen-Rose, J. & Norgard, T. (2019) Fisheries and Oceans Canada 2018 Northeast Pacific Seamounts Expedition. Unpublished raw data.	Cherisse Du Preez
190	Image 41	0	0.408172	0	0	0.0816344	0	0.0816344	0	0	0	0	0	0	0	0	0	0.979612	0	0	0	0	4	1.55105	0.326537		Count	N	70	0	30		12.2497	627.013	627.013	ROV	HD	Northeast Pacific, Canada	Dellwood Seamount (50.75, -130.90)	NA097_H1683_h_20180708_164205.jpeg	H1683	Du Preez, C., Best, M., Murdock, I., Boschen-Rose, J. & Norgard, T. (2019) Fisheries and Oceans Canada 2018 Northeast Pacific Seamounts Expedition. Unpublished raw data.	Cherisse Du Preez
191	Image 42	0	0.163477	0	0	0.0817387	0.0817387	0.0817387	0	0	0	0	0	0	0	0	0	13.0782	0	0	0	0	5	13.4869	0.408693		Count	N	80	5	15		12.2341	624.713	624.713	ROV	HD	Northeast Pacific, Canada	Dellwood Seamount (50.75, -130.90)	NA097_H1683_h_20180708_164415.jpeg	H1683	Du Preez, C., Best, M., Murdock, I., Boschen-Rose, J. & Norgard, T. (2019) Fisheries and Oceans Canada 2018 Northeast Pacific Seamounts Expedition. Unpublished raw data.	Cherisse Du Preez
192	Image 43	0	0.59093	0	0	0	0.118186	0	0	0	0	0	0	0	0	0	0	2.83646	0	0	0	0	3	3.54558	0.354558		Count	N	40	5	55		8.46124	621.313	621.313	ROV	HD	Northeast Pacific, Canada	Dellwood Seamount (50.75, -130.90)	NA097_H1683_h_20180708_164555.jpeg	H1683	Du Preez, C., Best, M., Murdock, I., Boschen-Rose, J. & Norgard, T. (2019) Fisheries and Oceans Canada 2018 Northeast Pacific Seamounts Expedition. Unpublished raw data.	Cherisse Du Preez
193	Image 44	0	0.0622918	0	0	0	0	0	0	0	0	0	0	0	0	0	0	8.97003	0	0	0	0	2	9.03232	0.124584		Count	N	65	10	25		16.0535	611.113	611.113	ROV	HD	Northeast Pacific, Canada	Dellwood Seamount (50.75, -130.90)	NA097_H1683_o_20180708_182915.jpeg	H1683	Du Preez, C., Best, M., Murdock, I., Boschen-Rose, J. & Norgard, T. (2019) Fisheries and Oceans Canada 2018 Northeast Pacific Seamounts Expedition. Unpublished raw data.	Cherisse Du Preez
194	Image 45	0	0.220769	0.0735896	0	0	0	0.220769	0	0	0	0	0	0	0	0	0	9.12511	0	0	0	0	4	9.64024	0.294358		Count	N	40	15	45		13.5889	610.813	610.813	ROV	HD	Northeast Pacific, Canada	Dellwood Seamount (50.75, -130.90)	NA097_H1683_o_20180708_182925.jpeg	H1683	Du Preez, C., Best, M., Murdock, I., Boschen-Rose, J. & Norgard, T. (2019) Fisheries and Oceans Canada 2018 Northeast Pacific Seamounts Expedition. Unpublished raw data.	Cherisse Du Preez
195	Image 46	0	0.367883	0.0735766	0	0.22073	0	0	0	0	0	0	0	0	0	0	0	7.94627	0	0	0	0	4	8.60846	0.294306		Count	N	55	0	45		13.5913	610.013	610.013	ROV	HD	Northeast Pacific, Canada	Dellwood Seamount (50.75, -130.90)	NA097_H1683_o_20180708_182945.jpeg	H1683	Du Preez, C., Best, M., Murdock, I., Boschen-Rose, J. & Norgard, T. (2019) Fisheries and Oceans Canada 2018 Northeast Pacific Seamounts Expedition. Unpublished raw data.	Cherisse Du Preez
196	Image 47	0	0.198004	0	0	0.0660013	0	0	0	0	0	0	0	0.0660013	0	0	0	3.56407	0	0	0	0	4	3.89407	0.264005		Count	N	55	5	40		15.1512	610.513	610.513	ROV	HD	Northeast Pacific, Canada	Dellwood Seamount (50.75, -130.90)	NA097_H1683_o_20180708_183115.jpeg	H1683	Du Preez, C., Best, M., Murdock, I., Boschen-Rose, J. & Norgard, T. (2019) Fisheries and Oceans Canada 2018 Northeast Pacific Seamounts Expedition. Unpublished raw data.	Cherisse Du Preez
197	Image 48	0	1.00932	0	0	0.576756	0	0	0	0	0	0	0	0	0	0	0	6.20013	0	0	0	0	3	7.7862	0.432567		Count	M	60	10	30		6.93534	604.613	604.613	ROV	HD	Northeast Pacific, Canada	Dellwood Seamount (50.75, -130.90)	NA097_H1683_u_20180708_200155.jpeg	H1683	Du Preez, C., Best, M., Murdock, I., Boschen-Rose, J. & Norgard, T. (2019) Fisheries and Oceans Canada 2018 Northeast Pacific Seamounts Expedition. Unpublished raw data.	Cherisse Du Preez
198	Image 49	0	0.0484211	0	0	0	0	0.0242106	0	0	0	0	0	0	0	0	0	0.363159	0	0	0	0	3	0.43579	0.0726317		Count	N	30	20	50		41.3043	597.013	597.013	ROV	HD	Northeast Pacific, Canada	Dellwood Seamount (50.75, -130.90)	NA097_H1683_v_20180708_202115.jpeg	H1683	Du Preez, C., Best, M., Murdock, I., Boschen-Rose, J. & Norgard, T. (2019) Fisheries and Oceans Canada 2018 Northeast Pacific Seamounts Expedition. Unpublished raw data.	Cherisse Du Preez
200	246_00611	53.8267	0	0	0	0	60.5551	6.72834	0	0	0	0	0	0	0	0	0.841043	0	0	0	0	3.36417	5	125.315	4.20521		Count	Y	0	0	16		1.189	796	796	ROV	12mp stills	NE Atlantic	Whittard canyon	246	611	Huvenne, V.A., Wynn, R.B. and Gales, J.A., 2016. RRS James Cook Cruise 124-125-126 09 Aug-12 Sep 2016. CODEMAP2015: Habitat Mapping and ROV Vibrocorer Trials Around Whittard Canyon and Haig Fras.	Pearman and Price
201	246_731	4.30493	0	0	0.717489	0	5.38117	1.79372	0	0	0	0	0	0	0	0	0.717489	0	0	0	0	0	5	12.9148	1.79372		Count	Y	0	0	15		2.7875	765	765	ROV	12mp stills	NE Atlantic	Whittard canyon	246	731	Huvenne, V.A., Wynn, R.B. and Gales, J.A., 2016. RRS James Cook Cruise 124-125-126 09 Aug-12 Sep 2016. CODEMAP2015: Habitat Mapping and ROV Vibrocorer Trials Around Whittard Canyon and Haig Fras.	Pearman and Price
202	246_01207	0	0	0	0	0	0	0	0	0	0	0	0	0	0	0	0.266276	0	0	0	0	0	1	0.266276	0.266276		Count	N	0	0	100		3.7555	639	639	ROV	12mp stills	NE Atlantic	Whittard canyon	246	1207	Huvenne, V.A., Wynn, R.B. and Gales, J.A., 2016. RRS James Cook Cruise 124-125-126 09 Aug-12 Sep 2016. CODEMAP2015: Habitat Mapping and ROV Vibrocorer Trials Around Whittard Canyon and Haig Fras.	Pearman and Price
204	246_01743	7.79782	0	0	0	0	3.19002	0.177223	0	0	0	0	0	0	0	0	0.708893	0	0	0	0	0	4	11.874	0.708893		Count	Y	0	0	82		5.6426	839	839	ROV	12mp stills	NE Atlantic	Whittard canyon	246	1743	Huvenne, V.A., Wynn, R.B. and Gales, J.A., 2016. RRS James Cook Cruise 124-125-126 09 Aug-12 Sep 2016. CODEMAP2015: Habitat Mapping and ROV Vibrocorer Trials Around Whittard Canyon and Haig Fras.	Pearman and Price
205	246_1773	9.58773	0	0	0	0	4.99361	0	0	0	0	0	0	0	0	0.199744	0.199744	0	0	0	4.79386	0	5	19.7747	0.998722		Count	Y	0	0	4		5.0064	870	870	ROV	12mp stills	NE Atlantic	Whittard canyon	246	1774	Huvenne, V.A., Wynn, R.B. and Gales, J.A., 2016. RRS James Cook Cruise 124-125-126 09 Aug-12 Sep 2016. CODEMAP2015: Habitat Mapping and ROV Vibrocorer Trials Around Whittard Canyon and Haig Fras.	Pearman and Price
206	247_00726	0	0	0	0	0	0.694444	0	0	0	0	0	0	0	0	0	0	0	0	0	0	0	1	0.694444	0.694444		Count	N	0	0	100		1.44	944	944	ROV	12mp stills	NE Atlantic	Whittard canyon	247	726	Huvenne, V.A., Wynn, R.B. and Gales, J.A., 2016. RRS James Cook Cruise 124-125-126 09 Aug-12 Sep 2016. CODEMAP2015: Habitat Mapping and ROV Vibrocorer Trials Around Whittard Canyon and Haig Fras.	Pearman and Price
207	247_00926	0	0	0	0	0	7.9191	0	0	0.609162	0	0	0	0	0	0	0	0.609162	0	0	0	0.609162	4	9.74659	2.43665		Count	M	0	52	48		1.6416	851	851	ROV	12mp stills	NE Atlantic	Whittard canyon	247	926	Huvenne, V.A., Wynn, R.B. and Gales, J.A., 2016. RRS James Cook Cruise 124-125-126 09 Aug-12 Sep 2016. CODEMAP2015: Habitat Mapping and ROV Vibrocorer Trials Around Whittard Canyon and Haig Fras.	Pearman and Price
209	248-00022	0	0	0	0	0	0	0	0.612745	0	0	0	0	0	0	0	0	0	0	0	0	0	1	0.612745	0.612745		Count	N	0	0	100		1.632	4165	4165	ROV	12mp stills	NE Atlantic	Whittard canyon	248	22	Huvenne, V.A., Wynn, R.B. and Gales, J.A., 2016. RRS James Cook Cruise 124-125-126 09 Aug-12 Sep 2016. CODEMAP2015: Habitat Mapping and ROV Vibrocorer Trials Around Whittard Canyon and Haig Fras.	Pearman and Price
212	248_00574	0	0	0	0	0	0	0	0	0	0	0	0	0	0	0.305101	0	0	0	0	0	0	1	0.305101	0.305101		Count	N	0	0	100		3.2776	4176	4176	ROV	12mp stills	NE Atlantic	Whittard canyon	248	574	Huvenne, V.A., Wynn, R.B. and Gales, J.A., 2016. RRS James Cook Cruise 124-125-126 09 Aug-12 Sep 2016. CODEMAP2015: Habitat Mapping and ROV Vibrocorer Trials Around Whittard Canyon and Haig Fras.	Pearman and Price
213	249_00907	11.4299	2.75165	0	0	0.211666	0.634997	0	0	0	0	0	0	0	0	0	0	0	0	0.634997	0	0	5	15.6633	1.00328		Count	Y	31	0	0		4.98366	1398	1398	ROV	12mp stills	NE Atlantic	Whittard canyon	249	907	Huvenne, V.A., Wynn, R.B. and Gales, J.A., 2016. RRS James Cook Cruise 124-125-126 09 Aug-12 Sep 2016. CODEMAP2015: Habitat Mapping and ROV Vibrocorer Trials Around Whittard Canyon and Haig Fras.	Pearman and Price
215	250_01608	0	0	0	0	0	6.56838	0	0	0	0	0	0	0	0	0	0	0	0	0	0	0.36491	2	6.93329	0.72982		Count	N	0	5	95		2.7404	785	785	ROV	12mp stills	NE Atlantic	Whittard canyon	250	1608	Huvenne, V.A., Wynn, R.B. and Gales, J.A., 2016. RRS James Cook Cruise 124-125-126 09 Aug-12 Sep 2016. CODEMAP2015: Habitat Mapping and ROV Vibrocorer Trials Around Whittard Canyon and Haig Fras.	Pearman and Price
216	250_01955	0	0	0	0	0	4.19287	0	0	0	0	0	0	0	0	0	0	0	0	0	0.698812	1.39762	3	6.28931	2.09644		Count	N	0	5	95		1.431	638	638	ROV	12mp stills	NE Atlantic	Whittard canyon	250	1955	Huvenne, V.A., Wynn, R.B. and Gales, J.A., 2016. RRS James Cook Cruise 124-125-126 09 Aug-12 Sep 2016. CODEMAP2015: Habitat Mapping and ROV Vibrocorer Trials Around Whittard Canyon and Haig Fras.	Pearman and Price
218	251_02026	13.1148	0	0	0	1.63934	24.5902	11.4754	0	1.63934	0	0	0	0	0	0	1.63934	0	0	0	1.63934	3.27869	8	59.0164	13.1148		Count	Y	0	7	36		0.61	579	579	ROV	12mp stills	NE Atlantic	Whittard canyon	251	2026	Huvenne, V.A., Wynn, R.B. and Gales, J.A., 2016. RRS James Cook Cruise 124-125-126 09 Aug-12 Sep 2016. CODEMAP2015: Habitat Mapping and ROV Vibrocorer Trials Around Whittard Canyon and Haig Fras.	Pearman and Price
219	251_02181	20.291	0	0	0	3.68927	0	0	0	0	0	0	0	0	0	3.22811	0.461159	0	0	0.691738	0.461159	0.230579	7	29.053	1.61406		Count	Y	85	0	0		4.3369	577	577	ROV	12mp stills	NE Atlantic	Whittard canyon	251	2181	Huvenne, V.A., Wynn, R.B. and Gales, J.A., 2016. RRS James Cook Cruise 124-125-126 09 Aug-12 Sep 2016. CODEMAP2015: Habitat Mapping and ROV Vibrocorer Trials Around Whittard Canyon and Haig Fras.	Pearman and Price
220	251_02298	4.64828	0	0	0	0	0	0.929656	0	0	0	0	0	0	0	0	0.929656	0	0	2.47908	0	0.309885	5	9.29656	1.54943		Count	Y	93	0	0		3.227	578	578	ROV	12mp stills	NE Atlantic	Whittard canyon	251	2298	Huvenne, V.A., Wynn, R.B. and Gales, J.A., 2016. RRS James Cook Cruise 124-125-126 09 Aug-12 Sep 2016. CODEMAP2015: Habitat Mapping and ROV Vibrocorer Trials Around Whittard Canyon and Haig Fras.	Pearman and Price
221	251_02577	0.773777	0	0	0	0	2.22461	0	0	0.290166	0	0	0	0	0	0	0.0967221	0	0	0	0	0.0967221	5	3.482	0.48361		Count	M	0	62	16		10.3389	545	545	ROV	12mp stills	NE Atlantic	Whittard canyon	251	2577	Huvenne, V.A., Wynn, R.B. and Gales, J.A., 2016. RRS James Cook Cruise 124-125-126 09 Aug-12 Sep 2016. CODEMAP2015: Habitat Mapping and ROV Vibrocorer Trials Around Whittard Canyon and Haig Fras.	Pearman and Price
222	252_00318	0.781922	0	0	0	0	5.99474	0	0	0	0	0	0	0	0	0	0	0	0	0	0	0	2	6.77666	0.521281		Count	M	0	20	73		3.8367	754	754	ROV	12mp stills	NE Atlantic	Whittard canyon	252	318	Huvenne, V.A., Wynn, R.B. and Gales, J.A., 2016. RRS James Cook Cruise 124-125-126 09 Aug-12 Sep 2016. CODEMAP2015: Habitat Mapping and ROV Vibrocorer Trials Around Whittard Canyon and Haig Fras.	Pearman and Price
224	254_00398	0	0	0	0	0	0.197957	0	0	0	0	0	0	0	0	0	0	0	0	0	0	0	1	0.197957	0.0659857		Count	N	75	20	5		15.1548	1078	1078	ROV	12mp stills	NE Atlantic	Whittard canyon	254	398	Huvenne, V.A., Wynn, R.B. and Gales, J.A., 2016. RRS James Cook Cruise 124-125-126 09 Aug-12 Sep 2016. CODEMAP2015: Habitat Mapping and ROV Vibrocorer Trials Around Whittard Canyon and Haig Fras.	Pearman and Price
226	255_00069	0	0	0	0	0	1.46185	0	0	0	0	0	0	0	0	0	0.162427	0	0	0	0	0	2	1.62427	0.324855		Count	N	100	0	0		6.1566	753	753	ROV	12mp stills	NE Atlantic	Whittard canyon	255	69	Huvenne, V.A., Wynn, R.B. and Gales, J.A., 2016. RRS James Cook Cruise 124-125-126 09 Aug-12 Sep 2016. CODEMAP2015: Habitat Mapping and ROV Vibrocorer Trials Around Whittard Canyon and Haig Fras.	Pearman and Price
227	255_00487	0	0	0	0	0	6.02773	0.317249	0	0.634498	0	0	0	0	0	0	0.317249	0	0	0.317249	0	1.90349	6	9.51746	1.90349		Count	N	100	0	0		3.1521	703	703	ROV	12mp stills	NE Atlantic	Whittard canyon	255	487	Huvenne, V.A., Wynn, R.B. and Gales, J.A., 2016. RRS James Cook Cruise 124-125-126 09 Aug-12 Sep 2016. CODEMAP2015: Habitat Mapping and ROV Vibrocorer Trials Around Whittard Canyon and Haig Fras.	Pearman and Price
228	255_00580	10.8324	0	0	0	1.01554	0.338513	1.35405	0	0	0	0	0	0	0	0	0	0	0	2.7081	0.338513	0	6	16.5871	2.03108		Count	Y	95	0	0		2.9541	672	672	ROV	12mp stills	NE Atlantic	Whittard canyon	255	580	Huvenne, V.A., Wynn, R.B. and Gales, J.A., 2016. RRS James Cook Cruise 124-125-126 09 Aug-12 Sep 2016. CODEMAP2015: Habitat Mapping and ROV Vibrocorer Trials Around Whittard Canyon and Haig Fras.	Pearman and Price
229	255_00607	7.28001	0	0	0	3.64	0	5.00501	0	0	0	0	0	1.82	0	0	0	0	0	20.02	1.365	0.910001	7	40.04	3.185		Count	Y	96	0	0		2.1978	634	634	ROV	12mp stills	NE Atlantic	Whittard canyon	255	607	Huvenne, V.A., Wynn, R.B. and Gales, J.A., 2016. RRS James Cook Cruise 124-125-126 09 Aug-12 Sep 2016. CODEMAP2015: Habitat Mapping and ROV Vibrocorer Trials Around Whittard Canyon and Haig Fras.	Pearman and Price
231	256_00517	0.110344	0	0	0	0	0.331031	0	0	0	0	0	0	0	0	0	0.331031	0	0	0	0	0	3	0.772405	0.331031		Count	N	85	4	10		9.0626	820	820	ROV	12mp stills	NE Atlantic	Whittard canyon	256	517	Huvenne, V.A., Wynn, R.B. and Gales, J.A., 2016. RRS James Cook Cruise 124-125-126 09 Aug-12 Sep 2016. CODEMAP2015: Habitat Mapping and ROV Vibrocorer Trials Around Whittard Canyon and Haig Fras.	Pearman and Price
233	256_00834	0.286862	0	0	0.286862	1.43431	1.72117	0	0	0	0	0	0	0	0	0	0	0	0	0.573723	0.573723	0	6	4.87665	1.72117		Count	N	95	1	4		3.486	677	677	ROV	12mp stills	NE Atlantic	Whittard canyon	256	834	Huvenne, V.A., Wynn, R.B. and Gales, J.A., 2016. RRS James Cook Cruise 124-125-126 09 Aug-12 Sep 2016. CODEMAP2015: Habitat Mapping and ROV Vibrocorer Trials Around Whittard Canyon and Haig Fras.	Pearman and Price
235	256_01508	2.00775	0	0	0	3.24329	1.69887	0	0	0	0	0	0	0	0	0	0.154443	0	0	0	0	0.308885	5	7.41324	0.772213		Count	Y	94	0	0		6.4749	775	775	ROV	12mp stills	NE Atlantic	Whittard canyon	256	1508	Huvenne, V.A., Wynn, R.B. and Gales, J.A., 2016. RRS James Cook Cruise 124-125-126 09 Aug-12 Sep 2016. CODEMAP2015: Habitat Mapping and ROV Vibrocorer Trials Around Whittard Canyon and Haig Fras.	Pearman and Price
236	257_00200	0	0.379147	0	0	0	0.505529	0	0	0	0	0	0	0	0	0	0	0	0	0	0	0	2	0.884676	0.252765		Count	N	100	0	0		7.9125	2750	2750	ROV	12mp stills	NE Atlantic	Whittard canyon	257	200	Huvenne, V.A., Wynn, R.B. and Gales, J.A., 2016. RRS James Cook Cruise 124-125-126 09 Aug-12 Sep 2016. CODEMAP2015: Habitat Mapping and ROV Vibrocorer Trials Around Whittard Canyon and Haig Fras.	Pearman and Price
237	257_00314	0	0.409812	0	0	0	0	0	0.0585446	0	0	0	0	0	0	0	0	0	0	0	0	0	2	0.468357	0.117089		Count	N	0	0	100		17.081	2614	2614	ROV	12mp stills	NE Atlantic	Whittard canyon	257	314	Huvenne, V.A., Wynn, R.B. and Gales, J.A., 2016. RRS James Cook Cruise 124-125-126 09 Aug-12 Sep 2016. CODEMAP2015: Habitat Mapping and ROV Vibrocorer Trials Around Whittard Canyon and Haig Fras.	Pearman and Price
238	257_01066	0	0	0.165695	0	0	0	0	0	0	0	0	0	0	0	0	0	0	0	0	0	0	1	0.165695	0.165695		Count	N	0	0	100		6.0352	2265	2265	ROV	12mp stills	NE Atlantic	Whittard canyon	257	1066	Huvenne, V.A., Wynn, R.B. and Gales, J.A., 2016. RRS James Cook Cruise 124-125-126 09 Aug-12 Sep 2016. CODEMAP2015: Habitat Mapping and ROV Vibrocorer Trials Around Whittard Canyon and Haig Fras.	Pearman and Price
241	259_00700	0	0	0	0	0	4.9975	0	0.832917	0	0	0	0	0	0	0	0	0	0	0	0	0	2	5.83042	0.832917		Count	N	0	0	100		2.4012	2460	2460	ROV	12mp stills	NE Atlantic	Whittard canyon	259	700	Huvenne, V.A., Wynn, R.B. and Gales, J.A., 2016. RRS James Cook Cruise 124-125-126 09 Aug-12 Sep 2016. CODEMAP2015: Habitat Mapping and ROV Vibrocorer Trials Around Whittard Canyon and Haig Fras.	Pearman and Price
242	262_00169	0	1.16618	0	0	0	3.49854	0	0	0	0	0.58309	0	0	0	0	1.16618	0	0	0	2.33236	0	5	8.74636	2.91545		Count	N	80	20	0		1.715	826	826	ROV	12mp stills	NE Atlantic	Whittard canyon	262	169	Huvenne, V.A., Wynn, R.B. and Gales, J.A., 2016. RRS James Cook Cruise 124-125-126 09 Aug-12 Sep 2016. CODEMAP2015: Habitat Mapping and ROV Vibrocorer Trials Around Whittard Canyon and Haig Fras.	Pearman and Price
243	262_00256	0	0	0	0.426257	0	2.55754	0.852515	0	0	0	2.9838	0	0	0	0	0.426257	0	0	0	0.426257	0.426257	7	8.09889	2.9838		Count	N	40	30	30		2.346	791	791	ROV	12mp stills	NE Atlantic	Whittard canyon	262	256	Huvenne, V.A., Wynn, R.B. and Gales, J.A., 2016. RRS James Cook Cruise 124-125-126 09 Aug-12 Sep 2016. CODEMAP2015: Habitat Mapping and ROV Vibrocorer Trials Around Whittard Canyon and Haig Fras.	Pearman and Price
245	262_01060	0	0	0	0	0	0	1.44676	0	0.964506	0	0	0	0	0	0	0	0	0	0	0	3.85802	3	6.26929	1.44676		Count	M	0	10	50		2.0736	494	494	ROV	12mp stills	NE Atlantic	Whittard canyon	262	1060	Huvenne, V.A., Wynn, R.B. and Gales, J.A., 2016. RRS James Cook Cruise 124-125-126 09 Aug-12 Sep 2016. CODEMAP2015: Habitat Mapping and ROV Vibrocorer Trials Around Whittard Canyon and Haig Fras.	Pearman and Price
246	262_01065	0	0	0	0	0	0.342114	0.114038	0	0	0	0	0	0	0	0	0	0	0	0	0	0.114038	3	0.57019	0.342114		Count	M	0	35	60		8.769	494	494	ROV	12mp stills	NE Atlantic	Whittard canyon	262	1065	Huvenne, V.A., Wynn, R.B. and Gales, J.A., 2016. RRS James Cook Cruise 124-125-126 09 Aug-12 Sep 2016. CODEMAP2015: Habitat Mapping and ROV Vibrocorer Trials Around Whittard Canyon and Haig Fras.	Pearman and Price
247	263_01163	0.770733	0	0	0	0.256911	0	0	0	0	0	0	0	0	5.13822	0	1.02764	0	0	0	0	0	4	7.19351	1.02764		Count	N	100	0	0		3.8924	1278	1278	ROV	12mp stills	NE Atlantic	Whittard canyon	263	1163	Huvenne, V.A., Wynn, R.B. and Gales, J.A., 2016. RRS James Cook Cruise 124-125-126 09 Aug-12 Sep 2016. CODEMAP2015: Habitat Mapping and ROV Vibrocorer Trials Around Whittard Canyon and Haig Fras.	Pearman and Price
248	263_01199	0	0	0	0	0.576037	1.15207	0	5.18433	0	0	0	0	0	0	0	0	0	0	0	0	0	3	6.91244	0.864055		Count	Y	0	0	100		3.472	1261	1261	ROV	12mp stills	NE Atlantic	Whittard canyon	263	1199	Huvenne, V.A., Wynn, R.B. and Gales, J.A., 2016. RRS James Cook Cruise 124-125-126 09 Aug-12 Sep 2016. CODEMAP2015: Habitat Mapping and ROV Vibrocorer Trials Around Whittard Canyon and Haig Fras.	Pearman and Price
249	263_01484	0	0	0	0	0	0	0	0	0	0	0	0	0	0	0	0.116291	0	0	0	0	0	1	0.116291	0.0581453		Count	N	0	0	100		17.1983	1185	1185	ROV	12mp stills	NE Atlantic	Whittard canyon	263	1484	Huvenne, V.A., Wynn, R.B. and Gales, J.A., 2016. RRS James Cook Cruise 124-125-126 09 Aug-12 Sep 2016. CODEMAP2015: Habitat Mapping and ROV Vibrocorer Trials Around Whittard Canyon and Haig Fras.	Pearman and Price
250	Image 1	0	0.763281	0	0	0.763281	0	0	1.52656	0	0	0	0	0	0	0	0	0.763281	0	0	0	0	4	3.8164	3.05312		Count	M		none		13101.3	1.31013	4028	4028	ROV	HD	Pacific CCZ	UK1, Site 6	Transects 1 and 2	10-21-2013_010811 254.png	Amon et al 2016	Diva Amon
251	Image 2	0	0	0	0	0	0	0	0.629479	0	0	0	0	0	0	0	0	1.25896	0	0	0	0	2	1.88844	0.629479		Count	M		none		31772.3	3.17723	4028	4028	ROV	HD	Pacific CCZ	UK1, Site 6	Transects 1 and 2	10-21-2013_011811 064.png	Amon et al 2016	Diva Amon
252	Image 3	0	0.451096	0	0	0	0	0	0.902191	0	0	0	0	0	0	0	0	0.902191	0	0	0.451096	0	4	2.70657	1.80438		Count	M		none		22168.3	2.21683	4026	4026	ROV	HD	Pacific CCZ	UK1, Site 6	Transects 1 and 2	10-21-2013_012811 006.png	Amon et al 2016	Diva Amon
253	Image 4	0	0	0	0	0	0	0	1.14361	0	0	0	0	0	0	0	0	0.76241	0	0	0	0	2	1.90602	0.76241		Count	M		none		26232.6	2.62326	4029	4029	ROV	HD	Pacific CCZ	UK1, Site 6	Transects 1 and 2	10-21-2013_012811 055.png	Amon et al 2016	Diva Amon
254	Image 5	0	0.286303	0	0	0.286303	0	0	0.572607	0	0	0	0	0	0	0	0	0.572607	0	0	0	0	4	1.71782	1.14521		Count	M		none		34928	3.4928	4029	4029	ROV	HD	Pacific CCZ	UK1, Site 6	Transects 1 and 2	10-21-2013_012811 094.png	Amon et al 2016	Diva Amon
255	Image 6	0	0.515395	0	0	0	0	0	2.06158	0.515395	0	0	0	0	0	0	0	0	0	0	0	0	3	3.09237	1.54618		Count	M		none		19402.6	1.94026	4027	4027	ROV	HD	Pacific CCZ	UK1, Site 6	Transects 1 and 2	10-21-2013_012811 231.png	Amon et al 2016	Diva Amon
256	Image 7	0	0.527687	0	0	0	0	0	0.527687	0	0	0	0	0	0	0	0	0.527687	0	0	0	0	3	1.58306	1.58306		Count	M		none		18950.6	1.89506	4029	4029	ROV	HD	Pacific CCZ	UK1, Site 6	Transects 1 and 2	10-21-2013_012811 256.png	Amon et al 2016	Diva Amon
257	Image 8	0	0	0	0	0	0	0	0.402723	0.402723	0	0	0	0	0	0	0	0.402723	0	0	0.805447	0.402723	5	2.41634	2.01362		Count	M		none		24830.9	2.48309	4028	4028	ROV	HD	Pacific CCZ	UK1, Site 6	Transects 1 and 2	10-21-2013_013811 020.png	Amon et al 2016	Diva Amon
258	Image 9	0	0	0	0	0.347279	0	0	0	0	0	0	0	0	0	0	0	0	0	0	0	0	1	0.347279	0.347279		Count	N		none		28795.3	2.87953	4033	4033	ROV	HD	Pacific CCZ	UK1, Site 6	Transects 1 and 2	10-21-2013_013811 105.png	Amon et al 2016	Diva Amon
259	Image 10	0	0	0	0	0	0	0	0.712369	0	0	0	0	0	0	0	0	0.356185	0	0	0.356185	0	3	1.42474	1.06855		Count	M		none		28075.3	2.80753	4026	4026	ROV	HD	Pacific CCZ	UK1, Site 6	Transects 1 and 2	10-21-2013_013811 140.png	Amon et al 2016	Diva Amon
260	Image 11	0	0.370779	0	0	0	0	0	1.11234	0	0	0	0	0	0	0	0	0	0	0	0	0	2	1.48311	0.741557		Count	M		none		26970.3	2.69703	4027	4027	ROV	HD	Pacific CCZ	UK1, Site 6	Transects 1 and 2	10-21-2013_014811 018.png	Amon et al 2016	Diva Amon
261	Image 12	0	0	0	0	0	0	0	0.267659	0	0	0	0	0	0	0	0	0.535318	0	0	0	0	2	0.802977	0.535318		Count	N		none		37361	3.7361	4027	4027	ROV	HD	Pacific CCZ	UK1, Site 6	Transects 1 and 2	10-21-2013_014811 093.png	Amon et al 2016	Diva Amon
262	Image 13	0	0.4446	0	0	0	0	0	0.4446	0	0	0	0	0	0	0	0	1.3338	0	0	0.4446	0	4	2.6676	1.7784		Count	M		none		22492.1	2.24921	4028	4028	ROV	HD	Pacific CCZ	UK1, Site 6	Transects 1 and 2	10-21-2013_014811 117.png	Amon et al 2016	Diva Amon
263	Image 14	0	0	0	0	0	0	0	0.587876	0	0	0.293938	0	0	0	0	0	0	0	0	0	0	2	0.881814	0.587876		Count	N		none		34020.8	3.40208	4027	4027	ROV	HD	Pacific CCZ	UK1, Site 6	Transects 1 and 2	10-21-2013_014811 275.png	Amon et al 2016	Diva Amon
264	Image 15	0	0.497579	0	0	0	0	0.497579	0.995157	0	0	0	0	0	0	0	0	0.995157	0	0	0	0	4	2.98547	1.99031		Count	Y		none		20097.3	2.00973	4028	4028	ROV	HD	Pacific CCZ	UK1, Site 6	Transects 1 and 2	10-21-2013_015811 039.png	Amon et al 2016	Diva Amon
265	Image 16	0	0.318761	0	0	0	0	0	0.318761	0	0	0	0	0	0	0	0	0.318761	0	0	0	0	3	0.956282	0.956282		Count	M		none		31371.5	3.13715	4023	4023	ROV	HD	Pacific CCZ	UK1, Site 6	Transects 1 and 2	10-21-2013_015811 198.png	Amon et al 2016	Diva Amon
266	Image 17	0	0	0	0	0	0	0	0.733913	0	0	0	0	0	0	0	0	0	0	0	0	0	1	0.733913	0.366956		Count	N		none		27251.2	2.72512	4027	4027	ROV	HD	Pacific CCZ	UK1, Site 6	Transects 1 and 2	10-21-2013_015811 201.png	Amon et al 2016	Diva Amon
267	Image 18	0	0	0	0	0	0	0	2.14906	0	0	0	0	0	0	0	0	0	0	0	1.43271	0	2	3.58177	1.43271		Count	M		none		13959.6	1.39596	4025	4025	ROV	HD	Pacific CCZ	UK1, Site 6	Transects 1 and 2	10-21-2013_020811 289.png	Amon et al 2016	Diva Amon
268	Image 19	0	0.862162	0	0	0	0	0	4.31081	0	0	0	0	0	0	0	0	0.862162	0	0	0	0	3	6.03513	2.58649		Count	Y		none		11598.7	1.15987	4025	4025	ROV	HD	Pacific CCZ	UK1, Site 6	Transects 1 and 2	10-21-2013_021811 122.png	Amon et al 2016	Diva Amon
269	Image 20	0	1.51158	0	0	0	0	0	0.755788	0	0	0	0	0	0	0	0	0	0	0	0	0	2	2.26737	1.51158		Count	M		none		13231.2	1.32312	4025	4025	ROV	HD	Pacific CCZ	UK1, Site 6	Transects 1 and 2	10-21-2013_021811 125.png	Amon et al 2016	Diva Amon
270	Image 21	0	2.20162	0	0	0	0	0	1.10081	0	0	0	0	0	0	0	0	2.20162	0	0	0	0	3	5.50405	3.30243		Count	M		none		9084.22	0.908422	4026	4026	ROV	HD	Pacific CCZ	UK1, Site 6	Transects 1 and 2	10-21-2013_022811 205.png	Amon et al 2016	Diva Amon
271	Image 22	0	0.649335	0	0	0	0	0	0.649335	0	0	0	0	0	0	0	0	1.29867	0	0	0	0	3	2.59734	1.94801		Count	M		none		15400.4	1.54004	4020	4020	ROV	HD	Pacific CCZ	UK1, Site 6	Transects 1 and 2	10-21-2013_022811 280.png	Amon et al 2016	Diva Amon
272	Image 23	0	0	0	0	0	0	0	0.648862	0	0	0	0	0	0	0	0	0.648862	0	0	0.648862	0	3	1.94659	1.94659		Count	N		none		15411.6	1.54116	4021	4021	ROV	HD	Pacific CCZ	UK1, Site 6	Transects 1 and 2	10-21-2013_024811 086.png	Amon et al 2016	Diva Amon
273	Image 24	0	0.932961	0	0	0.932961	0.932961	0.932961	0.932961	0	0	0	0	0	0	0	0	0.932961	0	0	0	0.932961	7	6.53072	6.53072		Count	Y		none		10718.6	1.07186	4021	4021	ROV	HD	Pacific CCZ	UK1, Site 6	Transects 1 and 2	10-21-2013_024811 217.png	Amon et al 2016	Diva Amon
274	Image 25	0	0.775195	0	0.775195	0	0	0	1.55039	0	0	0	0	0	0	0	0	0.775195	0	0	0	0	4	3.87598	3.10078		Count	Y		none		12900	1.29	4021	4021	ROV	HD	Pacific CCZ	UK1, Site 6	Transects 1 and 2	10-21-2013_024811 252.png	Amon et al 2016	Diva Amon
275	Image 26	0	0	0	0	0	0	0	0.943131	0	0	0	0	0	0	0	0	0.471566	0	0	0.471566	0	3	1.88626	1.4147		Count	N		none		21206	2.1206	4020	4020	ROV	HD	Pacific CCZ	UK1, Site 6	Transects 1 and 2	10-21-2013_033811 131.png	Amon et al 2016	Diva Amon
276	Image 27	0	0	0	0	0.575838	0	0	1.72751	0	0	0	0	0	0	0	0	0.575838	0	0	0.575838	0	4	3.45503	2.30335		Count	N		none		17366	1.7366	4021	4021	ROV	HD	Pacific CCZ	UK1, Site 6	Transects 1 and 2	10-21-2013_033811 133.png	Amon et al 2016	Diva Amon
277	Image 28	0	0	0	0	0.624338	0	0	1.24868	0	0	0	0	0	0	0	0	0	0	0	0	0	2	1.87301	1.24868		Count	N		none		16017	1.6017	4020	4020	ROV	HD	Pacific CCZ	UK1, Site 6	Transects 1 and 2	10-21-2013_034811 014.png	Amon et al 2016	Diva Amon
278	Image 29	0	0.776606	0	0	0	0	0	3.10642	0	0	0	0	0	0	0	0	0.776606	0	0	0	0.776606	4	5.43624	3.10642		Count	Y		none		12876.5	1.28765	4019	4019	ROV	HD	Pacific CCZ	UK1, Site 6	Transects 1 and 2	10-21-2013_034811 194.png	Amon et al 2016	Diva Amon
279	Image 30	0	0	0	0	2.14156	0	0	1.07078	0	0	0	0	0	0	0	0	0	0	0	0	1.07078	3	4.28312	3.21234		Count	N		none		9338.98	0.933898	4019	4019	ROV	HD	Pacific CCZ	UK1, Site 6	Transects 1 and 2	10-21-2013_034811 197.png	Amon et al 2016	Diva Amon
280	Image 31	0	0	0	0	0	0	0	1.04956	0	0	0	0	0	0	0	0	0	0	0	0	0	1	1.04956	1.04956		Count	N		none		9527.85	0.952785	4021	4021	ROV	HD	Pacific CCZ	UK1, Site 6	Transects 1 and 2	10-21-2013_035811 149.png	Amon et al 2016	Diva Amon
281	Image 32	0	0.638649	0	0	0	0	0	0.638649	0	0	0	0	0	0	0	0	0	0	0	0.638649	0	3	1.91595	1.91595		Count	N		none		15658	1.5658	4022	4022	ROV	HD	Pacific CCZ	UK1, Site 6	Transects 1 and 2	10-21-2013_035811 238.png	Amon et al 2016	Diva Amon
282	Image 33	0	0	0	0	0	0	0	0	0	0	0.820805	0	0	0	0	0	0.820805	0	0	0.410402	0	3	2.05201	1.23121		Count	N		none		24366.3	2.43663	4022	4022	ROV	HD	Pacific CCZ	UK1, Site 6	Transects 1 and 2	10-21-2013_035811 280.png	Amon et al 2016	Diva Amon
283	Image 34	0	0.386255	0	0.386255	0	0	0	0.386255	0	0	0	0	0	0	0	0	0.77251	0	0	0	0	4	1.93128	1.54502		Count			none		25889.6	2.58896	4022	4022	ROV	HD	Pacific CCZ	UK1, Site 6	Transects 1 and 2	10-21-2013_040811 051.png	Amon et al 2016	Diva Amon
284	Image 35	0	0	0	0	0	0	0	1.20252	0	0	0	0	0	0	0	0	0	0	0	0	0	1	1.20252	1.20252		Count	N		none		8315.85	0.831585	4023	4023	ROV	HD	Pacific CCZ	UK1, Site 6	Transects 1 and 2	10-21-2013_040811 143.png	Amon et al 2016	Diva Amon
285	Image 36	0	0	0	0	0	0	0	1.83512	0	0	0	0	0	0	0	0	0	0	0	0	0	1	1.83512	0.91756		Count	N		none		10898.5	1.08985	4024	4024	ROV	HD	Pacific CCZ	UK1, Site 6	Transects 1 and 2	10-21-2013_040811 210.png	Amon et al 2016	Diva Amon
286	Image 37	0	0	0	0	0	0	0	2.25042	0	0	0	0	0	0	0	0	0.75014	0	0	0	0	2	3.00056	1.50028		Count	N		none		13330.8	1.33308	4021	4021	ROV	HD	Pacific CCZ	UK1, Site 6	Transects 1 and 2	10-21-2013_040811 300.png	Amon et al 2016	Diva Amon
287	Image 38	0	0.36238	0	0	0	0	0	0.724761	0	0	0	0	0	0	0	0	0.36238	0	0	0	0	3	1.44952	1.08714		Count	N		none		27595.3	2.75953	4026	4026	ROV	HD	Pacific CCZ	UK1, Site 6	Transects 1 and 2	10-21-2013_041811 180.png	Amon et al 2016	Diva Amon
288	Image 39	0	0	0	0	0	0	0	1.83896	0	0	0.612987	0	0	0	0	0	0	0	0	0	0	2	2.45195	1.22597		Count			none		16313.6	1.63136		4025	ROV	HD	Pacific CCZ	UK1, Site 6	Transects 1 and 2	10-21-2013_042811 031.png	Amon et al 2016	Diva Amon
289	Image 40	0	0	0	0	0	0	0	2.37752	0	0	0	0	0	0	0	0	0	0	0	0	0	1	2.37752	0.59438		Count	N		none		16824.2	1.68242	4025	4025	ROV	HD	Pacific CCZ	UK1, Site 6	Transects 1 and 2	10-21-2013_042811 125.png	Amon et al 2016	Diva Amon
290	Image 41	0	0	0	0	0.835499	0	0	0	0	0	0	0	0	0	0	0	0	0	0	0	0	1	0.835499	0.835499		Count	N		none		11968.9	1.19689	4027	4027	ROV	HD	Pacific CCZ	UK1, Site 6	Transects 1 and 2	10-21-2013_042811 224.png	Amon et al 2016	Diva Amon
291	Image 42	0	0	0	0	0.557512	0	0	1.11502	0	0	0.557512	0	0	0	0	0	0.557512	0	0	0	0	4	2.78756	2.23005		Count	M		none		17936.8	1.79368	4028	4028	ROV	HD	Pacific CCZ	UK1, Site 6	Transects 1 and 2	10-21-2013_042811 248.png	Amon et al 2016	Diva Amon
292	Image 43	0	0	0	0	0	0	0	2.00292	0	0	0	0	0	0	0	0	0	0	0	0.66764	0	2	2.67056	1.33528		Count	M		none		14978.1	1.49781	4025	4025	ROV	HD	Pacific CCZ	UK1, Site 6	Transects 1 and 2	10-21-2013_043811 020.png	Amon et al 2016	Diva Amon
293	Image 44	0	0.371339	0	0	0	0	0	0.742679	0	0	0	0	0	0	0	0	0.742679	0	0	0	0	3	1.8567	1.11402		Count	M		none		26929.5	2.69295	4027	4027	ROV	HD	Pacific CCZ	UK1, Site 6	Transects 1 and 2	10-21-2013_043811 137.png	Amon et al 2016	Diva Amon
294	Image 45	0	0	0	0	0.543472	0	0	2.17389	0	0	0	0	0	0	0	0	0	0	0	0	0	2	2.71736	1.08694		Count	M		none		18400.2	1.84002	4028	4028	ROV	HD	Pacific CCZ	UK1, Site 6	Transects 1 and 2	10-21-2013_043811 223.png	Amon et al 2016	Diva Amon
295	Image 46	0	0	0	0	0	0	0	2.17079	0	0	0	0	0	0	0	0	0	0	0	1.08539	0	2	3.25618	2.17079		Count	N		none		9213.24	0.921324	4028	4028	ROV	HD	Pacific CCZ	UK1, Site 6	Transects 1 and 2	10-21-2013_043811 284.png	Amon et al 2016	Diva Amon
296	Image 47	0	1.03516	0	0	0	0	0	0.51758	0	0	0	0	0	0	0	0	1.03516	0	0.51758	1.03516	0	5	4.14064	2.5879		Count	Y		none		19320.7	1.93207	4027	4027	ROV	HD	Pacific CCZ	UK1, Site 6	Transects 1 and 2	10-21-2013_044811 076.png	Amon et al 2016	Diva Amon
297	Image 48	0	0	0	0	0.585575	0	0	0.585575	0	0	0	0	0	0	0	0	0.585575	0	0	0.585575	0	4	2.3423	2.3423		Count	M		none		17077.2	1.70772	4030	4030	ROV	HD	Pacific CCZ	UK1, Site 6	Transects 1 and 2	10-21-2013_044811 171.png	Amon et al 2016	Diva Amon
298	Image 49	0	0	0	0	0	0	0	0.418453	0	0	0	0	0	0	0	0	1.25536	0	0	0	0	2	1.67381	0.836906		Count	N		none		23897.5	2.38975	4031	4031	ROV	HD	Pacific CCZ	UK1, Site 6	Transects 1 and 2	10-21-2013_044811 288.png	Amon et al 2016	Diva Amon
299	Image 50	0	0	0	0	1.15382	0	0	4.61527	0	0	0	0	0	0	0	0	1.15382	0	0	0	0	3	6.92291	3.46146		Count	M		none		8666.88	0.866688	4062	4062	ROV	HD	Pacific CCZ	UK1, Site 6	Transects 1 and 2	10-21-2013_045811 105.png	Amon et al 2016	Diva Amon
300	Image 1	0	0	0	0	7.32345	0	0	0	0	0	0	0	0	0	0	0	52.3104	0	0	1.56931	0	3	61.2031	1.56931		Count	M	0	60	40	19116.7	1.91167	331	331	towed	SD	Norway	Nordland VI	R885VL913	R885VL913 d-00-07-02.jpg	MAREANO/Institute of Marine Research, Norway	Rebecca Ross
301	Image 2	23.2491	2.32491	0	0	0	0	0	0	0	0	0	0	0	0	0	0	0	0	0	0	0	2	25.574	0.464981		Percent Cover	Y	0	100	0	43012.5	4.30125	264	264	towed	SD	Norway	Nordland VI	R886VL914	R886VL914 c-00-06-01light.jpg	MAREANO/Institute of Marine Research, Norway	Rebecca Ross
302	Image 3	0	0	0	0	20.4337	0	0	0	0	0	0	0	0	0	0	0	0	0	0	0	0.567604	2	21.0013	1.13521		Count	Y	100	0	0	17617.9	1.76179	267	267	towed	SD	Norway	Nordland VI	R886VL914	R886VL914 c-00-04-31.jpg	MAREANO/Institute of Marine Research, Norway	Rebecca Ross
303	Image 4	0	0	0	0	8.39872	0	0	0	0	0	0	0	0	0	0	0	0	0	0	2.09968	0	2	10.4984	2.09968		Count	M	70	0	30	9525.26	0.952526	241	241	towed	SD	Norway	Nordland VI	R888VL916	R888VL916 b-00-04-13.jpg	MAREANO/Institute of Marine Research, Norway	Rebecca Ross
304	Image 5	0	0	0	0	73.4888	0	0	0	2.09968	0	0	0	0	0	0	0	0	0	0	0	2.09968	3	77.6882	3.14952		Percent Cover	Y	0	80	20	9525.26	0.952526	270	270	towed	SD	Norway	Nordland VI	R88VL914	R88VL914 c-00-00-23.jpg	MAREANO/Institute of Marine Research, Norway	Rebecca Ross
305	Image 6	52.3104	13.0776	0	0	2.61552	0.523104	0	0	0	0	0	0	0	0	0	0	0	0	0	0	0	4	68.5266	2.09241		Percent Cover	Y	0	100	0	19116.7	1.91167	267	267	towed	SD	Norway	Nordland VI	R886VL914	R886VL914 c-00-05-52.jpg	MAREANO/Institute of Marine Research, Norway	Rebecca Ross
306	Image 7	0	0	0	0	2.64821	0	0	0	0	0	0	0	0	0	0	0	0	0	0	0	0	1	2.64821	0.662053		Count	M	15	0	85	15104.5	1.51045	281	281	towed	SD	Norway	Nordland VI	R886VL914	R886VL914 d-00-02-01.jpg	MAREANO/Institute of Marine Research, Norway	Rebecca Ross
307	Image 8	0	0	1.52663	0	0	0	0	0	0	0	0	0	0	0	0	0	0	0	0	0	0	1	1.52663	1.52663		Count	N	0	0	100	6550.39	0.655039	318	318	towed	SD	Norway	Nordland VI	R887VL915	R887VL915 b-00-06-27-shark.jpg	MAREANO/Institute of Marine Research, Norway	Rebecca Ross
308	Image 9	0	0	0	0	3.95597	0	0	0	0	0	0	0	0	0	0	0	0	0	0	0	1.97799	2	5.93396	1.97799		Count	N	10	0	90	10111.3	1.01113	297	297	towed	SD	Norway	Nordland VI	R887VL915	R887VL915 c-00-05-35.jpg	MAREANO/Institute of Marine Research, Norway	Rebecca Ross
309	Image 10	0	0	3.40562	0	0	0	0	0	0	0	0	0	0	0	0	0	0	0	0	0	0	1	3.40562	0.567604		Count	Y	0	0	100	17617.9	1.76179	319	319	towed	SD	Norway	Nordland VI	R887VL915	R887VL915 still a-00-07-21.jpg	MAREANO/Institute of Marine Research, Norway	Rebecca Ross
310	Image 11	0	0	0	0	4.70793	0	0	0	0	0	0	0	0	0	0	0	0	0	0	0	0	1	4.70793	0.523104		Count	M	0	0	100	19116.7	1.91167	116	116	towed	SD	Norway	Nordland VI	R891VL919	R891VL919 c-07-26-17.jpg	MAREANO/Institute of Marine Research, Norway	Rebecca Ross
311	Image 12	0	0	0	0	43.6374	0	0	0	0	0	0	0	0	0	0	0	0	0	0	0	0	1	43.6374	0.872748		Percent Cover	Y	0	100	0	11458.1	1.14581	100	100	towed	SD	Norway	Nordland VI	R892VL920	R892VL920 still a01-44-20.jpg	MAREANO/Institute of Marine Research, Norway	Rebecca Ross
312	Image 13	0	0	0	0	16.6876	0	0	0	0	0	0	0	0	0	0	0	0	0	0	1.1125	0	2	17.8001	2.22501		Percent Cover	M	20	20	60	8988.73	0.898873	276	276	towed	SD	Norway	Nordland VI	R897VL925	R897VL925 d-02-05-15.jpg	MAREANO/Institute of Marine Research, Norway	Rebecca Ross
313	Image 14	0	0	4.08675	0	0	0	0	0	0	0	0	0	0	0	0	0	0	0	0	0	0	1	4.08675	0.81735		Count	Y	0	0	100	12234.7	1.22347	327	327	towed	SD	Norway	Nordland VI	R898VL926	R898VL926 d-00-19-04.jpg	MAREANO/Institute of Marine Research, Norway	Rebecca Ross
314	Image 15	0	0	0	0	17.4441	0	0	0	0	0	0	0	0	0	0	0	0	0	0	0	0	1	17.4441	2.18051		Count	N	0	20	80	4586.09	0.458609	287	287	towed	SD	Norway	Nordland VI	R902VL931	R902VL931 b-11-04-22.jpg	MAREANO/Institute of Marine Research, Norway	Rebecca Ross
315	Image 16	0	0	0	0	3.2694	0	0	0	0	0	0	0	0	0	0	0	0	0	0	0	0	1	3.2694	0.363266		Count	M	25	0	75	27528	2.7528	288	288	towed	SD	Norway	Nordland VI	R902VL931	R902VL931 d-03-26-05.jpg	MAREANO/Institute of Marine Research, Norway	Rebecca Ross
316	Image 17	0	0	0	0	6.27724	0	0	0	1.56931	0	0	0	0	0	0	0	0	0	0	0	0	2	7.84656	1.04621		Count	Y	25	0	75	19116.7	1.91167	212	212	towed	SD	Norway	Nordland VI	R907VL936	R907VL936 d-03-57-21.jpg	MAREANO/Institute of Marine Research, Norway	Rebecca Ross
317	Image 18	0	0	0	0	2.83802	0	0	0	0	0	0	0	0	0	0	0	0	0	0	0	0	1	2.83802	0.567604		Count	M	0	20	80	17617.9	1.76179	228	228	towed	SD	Norway	Nordland VI	R909VL938	R909VL938 c-05-18-11.jpg	MAREANO/Institute of Marine Research, Norway	Rebecca Ross
318	Image 19	0	3.16133	0	0	25.2906	3.16133	0	0	0	22.1293	0	0	0	0	0	0	0	0	0	3.16133	0	5	56.9039	15.8066		Count	M	0	60	40	3163.23	0.316323	528	528	towed	SD	Norway	Nordland VI	R944VL973	R944VL973 still b-00-04-01-11.jpg	MAREANO/Institute of Marine Research, Norway	Rebecca Ross
319	Image 20	0	0	0	0	167.393	0	31.3862	0	0	0	0	0	0	0	0	0	2.09241	0	0	0	0	3	200.872	6.27724		Percent cover	M	0	0	100	4779.17	0.477917	611	611	towed	SD	Norway	Nordland VI	R932VL961	R932VL961 storegga svamp crionider 400m	MAREANO/Institute of Marine Research, Norway	Rebecca Ross
320	Image 21	0	0	0	0	11.8679	0	0	0	0	4.94497	0	0	0	0	0	0	0	0	0	0	0.988993	3	17.8019	2.96698		Count	M	25	0	75	10111.3	1.01113	314	314	towed	SD	Norway	Nordland VI	R930VL959	R930VL959 c-02-36-03.jpg	MAREANO/Institute of Marine Research, Norway	Rebecca Ross
321	Image 22	0	0	0	0	3.84336	0.48042	0	0	0	0	0	0	0	0	0	0	0	0	0	0	0	2	4.32378	0.96084		Count	M	30	20	50	20815.1	2.08151	315	315	towed	SD	Norway	Nordland VI	R930VL959	R930VL959 b-07-37-11.jpg	MAREANO/Institute of Marine Research, Norway	Rebecca Ross
322	Image 23	0	0	0	0	7.91194	1.97799	0	0	0	0	0	0	0	0	0	0	0	0	0	0	0	2	9.88993	1.97799		Count	M	20	40	40	10111.3	1.01113	318	318	towed	SD	Norway	Nordland VI	R912VL941	R912VL941 c-00-06-50.jpg	MAREANO/Institute of Marine Research, Norway	Rebecca Ross
323	Image 24	0	0	0	0	7.34888	0	0	0	0	0	0	0	0	0	0	0	0	0	0	0	0	1	7.34888	1.04984		Count	M	20	40	40	9525.26	0.952526	228	228	towed	SD	Norway	Nordland VI	R909VL938	R909VL938 c-08-57-08.jpg	MAREANO/Institute of Marine Research, Norway	Rebecca Ross
324	Image 25	0	0	0	0	4.91136	0	0	0	15.9619	0	0	0	0	0	0	0	0	0	0	0	0	2	20.8733	1.22784		Count	M	80	0	20	16288.8	1.62888	120	120	towed	SD	Norway	Nordland VI	R891VL919	R891VL919 b-09-56-20.jpg	MAREANO/Institute of Marine Research, Norway	Rebecca Ross
325	Image 26	0	0	3.05507	0	0	0	0	0	0	0	0	0	0	0	0	0	0	0	0	0	0	1	3.05507	0.763768		Count	M	0	0	100	13093	1.3093	327	327	towed	SD	Norway	Nordland VI	R898VL926	R898VL926 c-10-20-12.jpg	MAREANO/Institute of Marine Research, Norway	Rebecca Ross
326	Image 27	0	0	1.22784	0	0	3.0696	0	0	0	0	0	0	0	0	0	0	0	0	0	0	0	2	4.29744	1.22784		Count	M	0	0	100	16288.8	1.62888	327	327	towed	SD	Norway	Nordland VI	R898VL926	R898VL926 d-02-07-10.jpg	MAREANO/Institute of Marine Research, Norway	Rebecca Ross
327	Image 28	0	0	0	0	2.83802	0	0	0	0	0	0	0	0	0	0	0	0	0	0	0	0	1	2.83802	0.567604		Count	N	0	100	0	17617.9	1.76179	314	314	towed	SD	Norway	Nordland VI	R930VL959	R930VL959 b-11-34-07.jpg	MAREANO/Institute of Marine Research, Norway	Rebecca Ross
328	Image 29	0	0	0	0	20.2757	0	0	0	0	0	0	0	0	0	0	0	0	0	0	0	0	1	20.2757	3.37929		Count	M	10	70	20	2959.2	0.29592	228	228	towed	SD	Norway	Nordland VI	R909VL938	R909VL938 still a-00-36-22.jpg	MAREANO/Institute of Marine Research, Norway	Rebecca Ross
329	Image 30	0	0	0	0	3.13862	0	0	0	0	0	0	0	0	0	0	0	0	0	0	0	0	1	3.13862	0.523104		Count	M	0	0	100	19116.7	1.91167	228	228	towed	SD	Norway	Nordland VI	R909VL938	R909VL938 c-00-02-24.jpg	MAREANO/Institute of Marine Research, Norway	Rebecca Ross
330	Image 31	0	0	0	0	0	0	0	0	0	0	0	0	0	0	0	0	0	0	0	23.655	0	1	23.655	3.37929		Count	N	0	0	100	2959.2	0.29592	820	820	towed	SD	Norway	Nordland VI	R942VL971	R942VL971 Storegga rør hull sjøstjerne 820m.jpg	MAREANO/Institute of Marine Research, Norway	Rebecca Ross
331	Image 32	0	2.90613	0	0	5.81226	0	0	0	1.45307	0	0	0	0	0	0	0	0	0	0	4.3592	2.90613	5	17.4368	7.26533		Count	M	20	40	40	6882	0.6882	350	350	towed	SD	Norway	Nordland VI	R930VL959	R930VL959 Storegga Lange og korallgul 350 m.jpg	MAREANO/Institute of Marine Research, Norway	Rebecca Ross
332	Image 33	0	0	0	0	11.4565	0	0	0	0	0	0	0	0	0	0	0	1.52754	0	0	0	1.52754	3	14.5116	2.2913		Count	M	15	50	35	13093	1.3093	287	287	towed	SD	Norway	Nordland VI	R913VL942	R913VL942 d-00-05-42.tif	MAREANO/Institute of Marine Research, Norway	Rebecca Ross
333	Image 34	0	4.72246	0	0	0	0	4.72246	0	0	0	0	0	0	0	0	0	0	0	0	0	0	2	9.44493	0.726533		Count	Y	20	10	70	27528	2.7528	790	790	towed	SD	Norway	Nordland VI	R943VL972	R943VL972 Storegga gorgonoc 3 stk 790m.jpg	MAREANO/Institute of Marine Research, Norway	Rebecca Ross
334	Image 35	0	0	0	0	0	0	0	0	0	0	0	0	0	0	0	0	791.194	0	0	0	0	1	791.194	3.95597		Count	N	0	40	60	2527.82	0.252782	442	442	towed	SD	Norway	Nordland VI	R735VL763	R735VL763 still e_03_23_00.tif	MAREANO/Institute of Marine Research, Norway	Rebecca Ross
335	Image 36	0	3.68352	0	0	1.22784	0	0	0	0	0	0	0	0	0.61392	0	0	0	0	0	0	0	3	5.52528	1.84176		Count	M	5	45	50	16288.8	1.62888	192	192	towed	SD	Norway	Nordland VI	R742VL770	R742VL770 b-00-04-02.tif	MAREANO/Institute of Marine Research, Norway	Rebecca Ross
336	Image 37	0	11.9197	0	0	5.67604	0	0	0	0	0	0	0	0	0	0	0	0	0	0	0	2.83802	3	20.4337	1.70281		Count	Y	20	70	10	17617.9	1.76179	192	192	towed	SD	Norway	Nordland VI	R742VL770	R742VL770 b-00-06-07.tif	MAREANO/Institute of Marine Research, Norway	Rebecca Ross
337	Image 38	0	0	0	0	7.26533	0	0	0	0	2.54287	0	0	0	0	0	0	0	0	0	18.1633	1.81633	4	29.7879	1.45307		Count	Y	40	40	20	27528	2.7528	265	265	towed	SD	Norway	Nordland VI	R744VL772	R744VL772 still a-00-04-46.tif	MAREANO/Institute of Marine Research, Norway	Rebecca Ross
338	Image 39	6.67502	2.22501	0	0	6.67502	0	0	0	0	0	0	0	0	0	5.56252	0	0	0	0	0	0	4	21.1376	4.45001		Count	Y	0	100	0	8988.73	0.898873	224	224	towed	SD	Norway	Nordland VI	R752VL780	R752VL780 still e-0-02-42.tif	MAREANO/Institute of Marine Research, Norway	Rebecca Ross
339	Image 40	0	2.22501	0	0	5.56252	0	0	0	0	0	0	0	222.501	0	0	0	0	0	0	0	0	3	230.288	3.33751		Count	N	0	50	50	8988.73	0.898873	721	721	towed	SD	Norway	Nordland VI	R777VL805	R777VL805 d-00-01-33.tif	MAREANO/Institute of Marine Research, Norway	Rebecca Ross
340	Image 41	2.45205	13.8949	0	0	3.2694	0	0	0	0	0	0	0	0	0	0	0	0	0	0	0	0.81735	4	20.4337	3.2694		Count	M	20	60	20	12234.7	1.22347	335	335	towed	SD	Norway	Nordland VI	R816VL844	R816VL844 c-00-04-55.tif	MAREANO/Institute of Marine Research, Norway	Rebecca Ross
341	Image 42	0	0	0	0	30.5144	0	0	0	0	0	0	0	0	0	0	0	23.2491	0	0	0	0	2	53.7634	2.90613		Count	M	30	30	40	6882	0.6882	574	574	towed	SD	Norway	Nordland VI	R817VL845	R817VL845 b-00-11-23.tif	MAREANO/Institute of Marine Research, Norway	Rebecca Ross
342	Image 43	0	0	0	0	2.83802	0	0	0	0	0	0	0	0	0	0	0	0	0	0	0	1.13521	2	3.97323	1.13521		Count	M	10	10	80	17617.9	1.76179	322	322	towed	SD	Norway	Nordland VI	R823VL851	R823VL851 b-00-03-00.tif	MAREANO/Institute of Marine Research, Norway	Rebecca Ross
343	Image 44	0	0	0	0	3.2694	0	0	0	0	0	0	0	0	0	0	0	0	0	0	0	3.2694	2	6.5388	1.6347		Count	M	5	20	75	12234.7	1.22347	322	322	towed	SD	Norway	Nordland VI	R823VL851	R823VL851 d-00-01-30.tif	MAREANO/Institute of Marine Research, Norway	Rebecca Ross
344	Image 45	0	0	0	0	0	0	21.2511	0	0	0	0	0	0	0	0	0	163.47	0	0	0	0	2	184.721	1.6347		Count	N	5	45	50	12234.7	1.22347	427	427	towed	SD	Norway	Nordland VI	R827VL855	R827VL855 b-00-02-13.tif	MAREANO/Institute of Marine Research, Norway	Rebecca Ross
345	Image 46	0	2.22501	0	0	2.22501	0	0	0	0	0	0	0	0	0	0	0	166.876	0	0	0	0	3	171.326	3.33751		Count	N	40	10	50	8988.73	0.898873	427	427	towed	SD	Norway	Nordland VI	R827VL855	R827VL855 d-00-03-15.tif	MAREANO/Institute of Marine Research, Norway	Rebecca Ross
346	Image 47	0	0.81735	0	0	8.1735	0	7.35615	0	0	0	0	0	0	0	0	0	0	0	0	0	0	3	16.347	2.45205		Count	M	50	10	40	12234.7	1.22347	427	427	towed	SD	Norway	Nordland VI	R827VL855	R827VL855 d-00-10-11.tif	MAREANO/Institute of Marine Research, Norway	Rebecca Ross
347	Image 48	11.125	6.67502	0	0	0	3.33751	0	0	0	0	0	0	0	0	5.56252	0	0	0	0	0	0	4	26.7001	4.45001		Count	Y	0	100	0	8988.73	0.898873	224	224	towed	SD	Norway	Nordland VI	R752VL780	R752VL780 e-00-02-01.tif	MAREANO/Institute of Marine Research, Norway	Rebecca Ross
348	Image 49	0	0	0	0	10.0125	0	0	0	2.22501	0	0	0	77.8753	0	0	0	0	0	0	0	0	3	90.1128	3.33751		Count	M	25	0	75	8988.73	0.898873	595	595	towed	SD	Norway	Nordland VI	R747VL755	R747VL755 still a-00-01-50.tif	MAREANO/Institute of Marine Research, Norway	Rebecca Ross
349	Image 50	0	0	0	0	4.3592	0	0	0	0	0	0	0	0	0	0	0	0	0	0	0	1.0898	2	5.449	0.726533		Count	Y	0	90	10	27528	2.7528	254	254	towed	SD	Norway	Nordland VI	R732VL760	R732VL760 b-00-03-20.jpg	MAREANO/Institute of Marine Research, Norway	Rebecca Ross
350	Image 1	0	1.00725	0	0	0	0	0	0	0	0	0	0	0	0	0	1.00725	0	0	0	0	0	2	2.01451	2.01451		Count	M	0	0	100	9927.99	0.992799	1458 - 1627	1542.5	ROV	HD	Northeast Atlantic	Irish Continental margin	D472_T38_11072017	IMG_5597	SeaRover is part supported by the Irish government and the European Maritime & Fisheries Fund as part of the EMFF Operational Programme for 2014-2020	David O'Sullivan & Rebecca Ross
351	Image 2	0	0	0	0	0	1.01459	0	0	0	0	0	0	0	0	0	0	1.52188	0	0	0	0	2	2.53647	1.01459		Count	M	0	0	100	19712.4	1.97124	1458 - 1627	1542.5	ROV	HD	Northeast Atlantic	Irish Continental margin	D472_T38_11072017	IMG_5608	SeaRover is part supported by the Irish government and the European Maritime & Fisheries Fund as part of the EMFF Operational Programme for 2014-2020	David O'Sullivan & Rebecca Ross
352	Image 3	0.104813	0.104813	0	0	0.104813	0.419252	0	0.628878	0	0	0	0	0	0	0	0	0.314439	0	0	0	0	6	1.67701	0.628878		Count	M	0	0	100	95408	9.5408	1458 - 1627	1542.5	ROV	HD	Northeast Atlantic	Irish Continental margin	D472_T38_11072017	IMG_5610	SeaRover is part supported by the Irish government and the European Maritime & Fisheries Fund as part of the EMFF Operational Programme for 2014-2020	David O'Sullivan & Rebecca Ross
353	Image 4	0.254696	0.0848985	0	0	0	0.0848985	0	0	0	0	0	0	0	0	0	0	0.169797	0	0	0	0	4	0.59429	0.339594		Count	M	0	1	99	117788	11.7788	1458 - 1627	1542.5	ROV	HD	Northeast Atlantic	Irish Continental margin	D472_T38_11072017	IMG_5617	SeaRover is part supported by the Irish government and the European Maritime & Fisheries Fund as part of the EMFF Operational Programme for 2014-2020	David O'Sullivan & Rebecca Ross
354	Image 5	0.154075	0.0513584	0.0513584	0	0.102717	0	0	0	0	0	0	0	0	0	0	0	0	0	0	0	0	4	0.359509	0.205434		Count	M	0	2	98	194710	19.471	1458 - 1627	1542.5	ROV	HD	Northeast Atlantic	Irish Continental margin	D472_T38_11072017	IMG_5622	SeaRover is part supported by the Irish government and the European Maritime & Fisheries Fund as part of the EMFF Operational Programme for 2014-2020	David O'Sullivan & Rebecca Ross
355	Image 6	1.67701	0	0	0	0.419252	0	0	0.838504	0	0	0	0	0	0	0	0	0.838504	0	0	0	0	4	3.77327	1.67701		Count	M	0	2	98	23852	2.3852	1458 - 1627	1542.5	ROV	HD	Northeast Atlantic	Irish Continental margin	D472_T38_11072017	IMG_5638	SeaRover is part supported by the Irish government and the European Maritime & Fisheries Fund as part of the EMFF Operational Programme for 2014-2020	David O'Sullivan & Rebecca Ross
356	Image 7	0	0	0	0	0.235829	0	0	0.943317	0	0	0	0	0	0	0	0	0	0	0	0	0	2	1.17915	0.471659		Count	M	0	0	100	42403.6	4.24036	1458 - 1627	1542.5	ROV	HD	Northeast Atlantic	Irish Continental margin	D472_T38_11072017	IMG_5644	SeaRover is part supported by the Irish government and the European Maritime & Fisheries Fund as part of the EMFF Operational Programme for 2014-2020	David O'Sullivan & Rebecca Ross
357	Image 8	0.410867	0.205434	0	0	0	0	0	0	0	0	0	0	0	0	0	0	0.410867	0	0	0	0	3	1.02717	0.616301		Count	M	0	2	98	48677.6	4.86776	1458 - 1627	1542.5	ROV	HD	Northeast Atlantic	Irish Continental margin	D472_T38_11072017	IMG_5647	SeaRover is part supported by the Irish government and the European Maritime & Fisheries Fund as part of the EMFF Operational Programme for 2014-2020	David O'Sullivan & Rebecca Ross
358	Image 9	0.134161	0	0	0	0.201241	0.536643	0	0	0	0	0	0	0	0	0	0	0.670803	0	0	0	0	4	1.54285	0.268321		Count	M	0	1	99	149075	14.9075	1458 - 1627	1542.5	ROV	HD	Northeast Atlantic	Irish Continental margin	D472_T38_11072017	IMG_5650	SeaRover is part supported by the Irish government and the European Maritime & Fisheries Fund as part of the EMFF Operational Programme for 2014-2020	David O'Sullivan & Rebecca Ross
359	Image 10	0	0.410867	1.02717	0	0.410867	0.410867	0	0	0	0	0	0	0	0	0	0	0.616301	0	0	0	0	5	2.87607	1.02717		Count	M	0	1	99	48677.6	4.86776	1458 - 1627	1542.5	ROV	HD	Northeast Atlantic	Irish Continental margin	D472_T38_11072017	IMG_5662	SeaRover is part supported by the Irish government and the European Maritime & Fisheries Fund as part of the EMFF Operational Programme for 2014-2020	David O'Sullivan & Rebecca Ross
360	Image 11	0.536643	0.268321	2.68321	0	0.268321	0	0	0	0	0	0	0	0	0	0	0	0.536643	0	0	0	0	5	4.29314	1.34161		Count	M	0	1	99	37268.8	3.72688	1458 - 1627	1542.5	ROV	HD	Northeast Atlantic	Irish Continental margin	D472_T38_11072017	IMG_5663	SeaRover is part supported by the Irish government and the European Maritime & Fisheries Fund as part of the EMFF Operational Programme for 2014-2020	David O'Sullivan & Rebecca Ross
361	Image 12	0.616301	0.410867	1.8489	0	0	0	0	0	0	0	0	0	0	0	0	0	0.205434	0	0	0	0	4	3.0815	0.821734		Count	M	0	1	99	48677.6	4.86776	1458 - 1627	1542.5	ROV	HD	Northeast Atlantic	Irish Continental margin	D472_T38_11072017	IMG_5664	SeaRover is part supported by the Irish government and the European Maritime & Fisheries Fund as part of the EMFF Operational Programme for 2014-2020	David O'Sullivan & Rebecca Ross
362	Image 13	0.905584	0.150931	1.05652	0	0.603723	0	0	0	0	0	0	0	0	0	0	0	0.452792	0	0	0	0	5	3.16955	0.754654		Count	M	0	2	98	66255.6	6.62556	1458 - 1627	1542.5	ROV	HD	Northeast Atlantic	Irish Continental margin	D472_T38_11072017	IMG_5668	SeaRover is part supported by the Irish government and the European Maritime & Fisheries Fund as part of the EMFF Operational Programme for 2014-2020	David O'Sullivan & Rebecca Ross
363	Image 14	1.10892	0.554461	0	2.7723	3.88123	0	0	0	0	0	0	0	0	0	0	0	1.10892	0	0	0	0	5	9.42583	2.7723		Count	M	0	2	98	18035.5	1.80355	1458 - 1627	1542.5	ROV	HD	Northeast Atlantic	Irish Continental margin	D472_T38_11072017	IMG_5673	SeaRover is part supported by the Irish government and the European Maritime & Fisheries Fund as part of the EMFF Operational Programme for 2014-2020	David O'Sullivan & Rebecca Ross
364	Image 15	0.380471	0.253647	0	0.760942	0.507295	0.126824	0	0	0	0	0	0	0	0	0	0	0.253647	0	0	0	0	6	2.28283	0.760942		Count	M	0	1	99	78849.6	7.88496	1458 - 1627	1542.5	ROV	HD	Northeast Atlantic	Irish Continental margin	D472_T38_11072017	IMG_5676	SeaRover is part supported by the Irish government and the European Maritime & Fisheries Fund as part of the EMFF Operational Programme for 2014-2020	David O'Sullivan & Rebecca Ross
365	Image 16	1.31016	1.31016	0	1.31016	0	0	0	0	0	0	0	0	0	0	0	0	1.31016	0	0	0	0	4	5.24065	2.62033		Count	M	0	2	98	15265.3	1.52653	1458 - 1627	1542.5	ROV	HD	Northeast Atlantic	Irish Continental margin	D472_T38_11072017	IMG_5677	SeaRover is part supported by the Irish government and the European Maritime & Fisheries Fund as part of the EMFF Operational Programme for 2014-2020	David O'Sullivan & Rebecca Ross
366	Image 17	1.20745	0.150931	0.301861	0.603723	0.301861	0	0	0	0	0	0.150931	0	0	0	0	0	0	0	0	0	0	6	2.71675	0.905584		Count	M	0	2	98	66255.6	6.62556	1458 - 1627	1542.5	ROV	HD	Northeast Atlantic	Irish Continental margin	D472_T38_11072017	IMG_5679	SeaRover is part supported by the Irish government and the European Maritime & Fisheries Fund as part of the EMFF Operational Programme for 2014-2020	David O'Sullivan & Rebecca Ross
367	Image 18	1.02717	0.410867	0	1.43803	2.4652	0.205434	0	0	0	0	0.410867	0	0	0	0	0	0.616301	0	0	0	0	7	6.57387	1.43803		Count	M	0	2	98	48677.6	4.86776	1458 - 1627	1542.5	ROV	HD	Northeast Atlantic	Irish Continental margin	D472_T38_11072017	IMG_5685	SeaRover is part supported by the Irish government and the European Maritime & Fisheries Fund as part of the EMFF Operational Programme for 2014-2020	David O'Sullivan & Rebecca Ross
368	Image 19	1.02717	0.616301	0	0.410867	1.64347	0	0	0.616301	0	0	0	0	0	0	0	0	1.2326	0	0	0	0	6	5.5467	1.2326		Count	M	0	2	98	48677.6	4.86776	1458 - 1627	1542.5	ROV	HD	Northeast Atlantic	Irish Continental margin	D472_T38_11072017	IMG_5687	SeaRover is part supported by the Irish government and the European Maritime & Fisheries Fund as part of the EMFF Operational Programme for 2014-2020	David O'Sullivan & Rebecca Ross
369	Image 20	4.40739	0	0	0.881477	6.17034	0	0	0	0	0	4.40739	0.881477	7.05182	0	0	0	0	0	0	0	4.40739	7	28.2073	6.17034		Count	M	0	10	90	11344.6	1.13446	1458 - 1627	1542.5	ROV	HD	Northeast Atlantic	Irish Continental margin	D472_T38_11072017	IMG_5693	SeaRover is part supported by the Irish government and the European Maritime & Fisheries Fund as part of the EMFF Operational Programme for 2014-2020	David O'Sullivan & Rebecca Ross
370	Image 21	1.01878	0.254696	0	0.59429	1.52817	0.509391	0	0	0	0	0.169797	0	0	0	0	0	0	0	0	0	0	6	4.07513	0.509391		Count	M	0	2	98	117788	11.7788	1458 - 1627	1542.5	ROV	HD	Northeast Atlantic	Irish Continental margin	D472_T38_11072017	IMG_5698	SeaRover is part supported by the Irish government and the European Maritime & Fisheries Fund as part of the EMFF Operational Programme for 2014-2020	David O'Sullivan & Rebecca Ross
371	Image 22	3.54268	0	0	0	1.23994	0	0.354268	0	0	0	0.708536	0	1.77134	0	0	0	0	0	0	0	0	5	7.61676	0.88567		Count	M	0	50	50	56454.4	5.64544	1458 - 1627	1542.5	ROV	HD	Northeast Atlantic	Irish Continental margin	D472_T38_11072017	IMG_5700	SeaRover is part supported by the Irish government and the European Maritime & Fisheries Fund as part of the EMFF Operational Programme for 2014-2020	David O'Sullivan & Rebecca Ross
372	Image 23	1.52817	0.254696	0	0	0.339594	0.59429	0.169797	0	0	0	0.764087	0	0	0	0	0	0	0	0	0	0	6	3.65064	0.509391		Count	M	0	50	50	117788	11.7788	1458 - 1627	1542.5	ROV	HD	Northeast Atlantic	Irish Continental margin	D472_T38_11072017	IMG_5701	SeaRover is part supported by the Irish government and the European Maritime & Fisheries Fund as part of the EMFF Operational Programme for 2014-2020	David O'Sullivan & Rebecca Ross
373	Image 24	12.1164	4.84655	0	0	7.26983	2.42328	1.21164	0	0	0	9.69311	0	12.1164	0	0	0	0	0	0	0	1.21164	8	50.8888	9.69311		Count	M	0	50	50	8253.29	0.825329	1458 - 1627	1542.5	ROV	HD	Northeast Atlantic	Irish Continental margin	D472_T38_11072017	IMG_5706	SeaRover is part supported by the Irish government and the European Maritime & Fisheries Fund as part of the EMFF Operational Programme for 2014-2020	David O'Sullivan & Rebecca Ross
374	Image 25	0.804964	0.0670803	0.0670803	0.536643	1.27453	0.335402	0.134161	0	0	0	0.201241	0	0	0	0	0	0	0	0	0	0	8	3.4211	0.536643		Count	M	0	5	95	149075	14.9075	1458 - 1627	1542.5	ROV	HD	Northeast Atlantic	Irish Continental margin	D472_T38_11072017	IMG_5711	SeaRover is part supported by the Irish government and the European Maritime & Fisheries Fund as part of the EMFF Operational Programme for 2014-2020	David O'Sullivan & Rebecca Ross
375	Image 26	3.0291	0.30291	0	0	3.93782	0	0	0	0	0	1.21164	0.30291	0	0	0	0	0	0	0	0	1.21164	6	9.99602	1.81746		Count	M	0	10	90	33013.1	3.30131	1458 - 1627	1542.5	ROV	HD	Northeast Atlantic	Irish Continental margin	D472_T38_11072017	IMG_5716	SeaRover is part supported by the Irish government and the European Maritime & Fisheries Fund as part of the EMFF Operational Programme for 2014-2020	David O'Sullivan & Rebecca Ross
376	Image 27	0.589573	0.117915	0.0589573	0	0.176872	0.353744	0	0	0	0	0.117915	0	0	0	0	0.0589573	0	0	0.0589573	0.0589573	0	9	1.59185	0.530616		Count	M	0	3	97	169614	16.9614	1458 - 1627	1542.5	ROV	HD	Northeast Atlantic	Irish Continental margin	D472_T38_11072017	IMG_5722	SeaRover is part supported by the Irish government and the European Maritime & Fisheries Fund as part of the EMFF Operational Programme for 2014-2020	David O'Sullivan & Rebecca Ross
377	Image 28	3.39594	0	0	0	1.35838	1.01878	0	0	0	0	0.339594	0	0	0	0	0	0.679188	0	0	0	0	5	6.79188	1.69797		Count	M	0	10	90	29446.9	2.94469	1458 - 1627	1542.5	ROV	HD	Northeast Atlantic	Irish Continental margin	D472_T38_11072017	IMG_5727	SeaRover is part supported by the Irish government and the European Maritime & Fisheries Fund as part of the EMFF Operational Programme for 2014-2020	David O'Sullivan & Rebecca Ross
378	Image 29	2.28283	0	0.570707	0.285353	1.71212	1.14141	0	0	0	0	0	0	0	0	0	0	0.570707	0	0	0	0	6	6.56313	1.71212		Count	M	0	15	85	35044.3	3.50443	1458 - 1627	1542.5	ROV	HD	Northeast Atlantic	Irish Continental margin	D472_T38_11072017	IMG_5728	SeaRover is part supported by the Irish government and the European Maritime & Fisheries Fund as part of the EMFF Operational Programme for 2014-2020	David O'Sullivan & Rebecca Ross
379	Image 30	1.88663	0	0	0	0	0	0.235829	0	0	0	0	0	2.35829	0	0	0.235829	0	0	0	0	0	4	4.71659	0.943317		Count	M	0	2	98	42403.6	4.24036	1458 - 1627	1542.5	ROV	HD	Northeast Atlantic	Irish Continental margin	D472_T38_11072017	IMG_5730	SeaRover is part supported by the Irish government and the European Maritime & Fisheries Fund as part of the EMFF Operational Programme for 2014-2020	David O'Sullivan & Rebecca Ross
380	Image 31	1.60993	0.268321	0	0.536643	1.07329	0	0	0	0	0	0	0	0	0	0	0	0	0	0	0	0	4	3.48818	1.07329		Count	M	0	3	97	37268.8	3.72688	1458 - 1627	1542.5	ROV	HD	Northeast Atlantic	Irish Continental margin	D472_T38_11072017	IMG_5731	SeaRover is part supported by the Irish government and the European Maritime & Fisheries Fund as part of the EMFF Operational Programme for 2014-2020	David O'Sullivan & Rebecca Ross
381	Image 32	8.31691	0.554461	0	0	4.99015	1.66338	1.66338	0	0	0	0	0	0	0	0	0.554461	0	0	0	0	0	6	17.7427	3.32677		Count	M	0	30	70	18035.5	1.80355	1458 - 1627	1542.5	ROV	HD	Northeast Atlantic	Irish Continental margin	D472_T38_11072017	IMG_5732	SeaRover is part supported by the Irish government and the European Maritime & Fisheries Fund as part of the EMFF Operational Programme for 2014-2020	David O'Sullivan & Rebecca Ross
382	Image 33	1.99145	0	0.104813	0.419252	0.943317	0.628878	0	0	0	0	0.314439	0	0	0	0	0	0	0	0	0	0	6	4.40215	0.628878		Count	M	0	20	80	95408	9.5408	1458 - 1627	1542.5	ROV	HD	Northeast Atlantic	Irish Continental margin	D472_T38_11072017	IMG_5733	SeaRover is part supported by the Irish government and the European Maritime & Fisheries Fund as part of the EMFF Operational Programme for 2014-2020	David O'Sullivan & Rebecca Ross
383	Image 34	9.3881	0.531402	0	0	0	0	0.531402	1.41707	0	0	0	0	0	0	0	0.708536	0	0	0	0	0	5	12.5765	0.88567		Count	M	0	0	100	56454.4	5.64544	800 - 1100	950	ROV	HD	Northeast Atlantic	Irish Continental margin	D473_T26_11072017	IMG_5738	SeaRover is part supported by the Irish government and the European Maritime & Fisheries Fund as part of the EMFF Operational Programme for 2014-2020	David O'Sullivan & Rebecca Ross
384	Image 35	12.7222	1.21164	0	0	0	0	0.605819	1.81746	0	0	0	0	0	0	0	0	0	0	0	0	0	4	16.3571	1.21164		Count	M	0	0	100	33013.1	3.30131	800 - 1100	950	ROV	HD	Northeast Atlantic	Irish Continental margin	D473_T26_11072017	IMG_5739	SeaRover is part supported by the Irish government and the European Maritime & Fisheries Fund as part of the EMFF Operational Programme for 2014-2020	David O'Sullivan & Rebecca Ross
385	Image 36	0	0	0	0	0	2.24693	0.64198	0	0	0	0	0	0	0	0	0	0	0	0	0	0	2	2.88891	0.64198		Count	M	0	0	100	31153.6	3.11536	800 - 1100	950	ROV	HD	Northeast Atlantic	Irish Continental margin	D473_T26_11072017	IMG_5765	SeaRover is part supported by the Irish government and the European Maritime & Fisheries Fund as part of the EMFF Operational Programme for 2014-2020	David O'Sullivan & Rebecca Ross
386	Image 37	0	0.924451	0	0	0	2.31113	0.924451	0	0	0	0	0	0	0	0	0	0	0	0	0	0	3	4.16003	1.38668		Count	M	0	0	100	21634.5	2.16345	800 - 1100	950	ROV	HD	Northeast Atlantic	Irish Continental margin	D473_T26_11072017	IMG_5766	SeaRover is part supported by the Irish government and the European Maritime & Fisheries Fund as part of the EMFF Operational Programme for 2014-2020	David O'Sullivan & Rebecca Ross
387	Image 38	0	0	0	0	0	2.89415	0	0	0	0	0	0	0	0	0	0.57883	0	0	0	0	0.57883	3	4.05181	1.73649		Count	M	0	0	100	17276.2	1.72762	800 - 1100	950	ROV	HD	Northeast Atlantic	Irish Continental margin	D473_T26_11072017	IMG_5779	SeaRover is part supported by the Irish government and the European Maritime & Fisheries Fund as part of the EMFF Operational Programme for 2014-2020	David O'Sullivan & Rebecca Ross
388	Image 39	0	0	0	0.57883	0	5.20947	0	0	0	0	0	0	0	0	0	1.73649	0	0	0	0	0	3	7.52479	1.73649		Count	M	0	0	100	17276.2	1.72762	800 - 1100	950	ROV	HD	Northeast Atlantic	Irish Continental margin	D473_T26_11072017	IMG_5808	SeaRover is part supported by the Irish government and the European Maritime & Fisheries Fund as part of the EMFF Operational Programme for 2014-2020	David O'Sullivan & Rebecca Ross
389	Image 40	0	0	0	0	2.21784	1.66338	0	0	0	0	0	0	0	0	0	2.7723	0	0	0	0	0	3	6.65353	1.66338		Count	M	0	0	100	18035.5	1.80355	800 - 1100	950	ROV	HD	Northeast Atlantic	Irish Continental margin	D473_T26_11072017	IMG_5809	SeaRover is part supported by the Irish government and the European Maritime & Fisheries Fund as part of the EMFF Operational Programme for 2014-2020	David O'Sullivan & Rebecca Ross
390	Image 41	0	0.462225	0	1.38668	0	1.38668	0	0	0	0	0	0	0	0	0	1.38668	0	0	0	0	0	4	4.62225	1.8489		Count	M	0	0	100	21634.5	2.16345	800 - 1100	950	ROV	HD	Northeast Atlantic	Irish Continental margin	D473_T26_11072017	IMG_5811	SeaRover is part supported by the Irish government and the European Maritime & Fisheries Fund as part of the EMFF Operational Programme for 2014-2020	David O'Sullivan & Rebecca Ross
391	Image 42	0	0.268321	0	0.536643	0	0.804964	0	0	0	0	0	0	0	0	0	1.87825	0	0	0	0	0	4	3.48818	1.07329		Count	M	0	0	100	37268.8	3.72688	800 - 1100	950	ROV	HD	Northeast Atlantic	Irish Continental margin	D473_T26_11072017	IMG_5818	SeaRover is part supported by the Irish government and the European Maritime & Fisheries Fund as part of the EMFF Operational Programme for 2014-2020	David O'Sullivan & Rebecca Ross
392	Image 43	0	0	0	0.838504	0	1.25776	0	0	0	0	0	0	0	0	0	0.419252	0	0	0	0	0	3	2.51551	1.25776		Count	M	0	0	100	23852	2.3852	800 - 1100	950	ROV	HD	Northeast Atlantic	Irish Continental margin	D473_T26_11072017	IMG_5821	SeaRover is part supported by the Irish government and the European Maritime & Fisheries Fund as part of the EMFF Operational Programme for 2014-2020	David O'Sullivan & Rebecca Ross
393	Image 44	1.41498	0	0.235829	0	1.41498	1.41498	0	0	0	0	0	0	0	0	0	0.235829	0	0	0	0	0	5	4.71659	1.17915		Count	M	100	0	0	42403.6	4.24036	1211 - 1491	1351	ROV	HD	Northeast Atlantic	Irish Continental margin	D487_T25_17072017	IMG_6914	SeaRover is part supported by the Irish government and the European Maritime & Fisheries Fund as part of the EMFF Operational Programme for 2014-2020	David O'Sullivan & Rebecca Ross
394	Image 45	1.01459	0	0	0	0.507295	0	0	0.507295	0	0	0	0	0	0	0	0.126824	0.507295	0	0	0	0	5	2.6633	0.634119		Count	M	100	0	0	78849.6	7.88496	1211 - 1491	1351	ROV	HD	Northeast Atlantic	Irish Continental margin	D487_T25_17072017	IMG_6918	SeaRover is part supported by the Irish government and the European Maritime & Fisheries Fund as part of the EMFF Operational Programme for 2014-2020	David O'Sullivan & Rebecca Ross
395	Image 46	7.43963	0.88567	0.177134	1.0628	0.88567	0	0	0	0	0	0	0	0	0	0	0.177134	0	0	0	0	0	6	10.628	1.0628		Count	M	100	0	0	56454.4	5.64544	1211 - 1491	1351	ROV	HD	Northeast Atlantic	Irish Continental margin	D487_T25_17072017	IMG_6923	SeaRover is part supported by the Irish government and the European Maritime & Fisheries Fund as part of the EMFF Operational Programme for 2014-2020	David O'Sullivan & Rebecca Ross
396	Image 47	7.19017	1.02717	0	0	1.02717	0	0	0	0	0	0	0	0	0	0	0	0	0	0	0	0	3	9.24451	0.616301		Count	M	100	0	0	48677.6	4.86776	1211 - 1491	1351	ROV	HD	Northeast Atlantic	Irish Continental margin	D487_T25_17072017	IMG_6930	SeaRover is part supported by the Irish government and the European Maritime & Fisheries Fund as part of the EMFF Operational Programme for 2014-2020	David O'Sullivan & Rebecca Ross
397	Image 48	2.05434	0.410867	0	0	0.616301	0	0	0	0	0	0	0	0	0	0	0.205434	0	0	0	0	0	4	3.28694	0.821734		Count	M	60	0	40	48677.6	4.86776	1211 - 1491	1351	ROV	HD	Northeast Atlantic	Irish Continental margin	D487_T25_17072017	IMG_6934	SeaRover is part supported by the Irish government and the European Maritime & Fisheries Fund as part of the EMFF Operational Programme for 2014-2020	David O'Sullivan & Rebecca Ross
398	Image 49	0	0.0513584	0	0	0	0.410867	0	0.359509	0	0	0	0	0	0	0	0	0	0	0	0	0	3	0.821734	0.154075		Count	M	0	0	100	194710	19.471	1211 - 1491	1351	ROV	HD	Northeast Atlantic	Irish Continental margin	D487_T25_17072017	IMG_6967	SeaRover is part supported by the Irish government and the European Maritime & Fisheries Fund as part of the EMFF Operational Programme for 2014-2020	David O'Sullivan & Rebecca Ross
399	Image 50	0	0.905584	0	0	0.603723	0.754654	0	1.20745	0	0	0	0	0	0	0	0.301861	0	0	0	0	0	5	3.77327	0.754654		Count	M	0	0	100	66255.6	6.62556	1211 - 1491	1351	ROV	HD	Northeast Atlantic	Irish Continental margin	D487_T25_17072017	IMG_7113	SeaRover is part supported by the Irish government and the European Maritime & Fisheries Fund as part of the EMFF Operational Programme for 2014-2020	David O'Sullivan & Rebecca Ross
400	Image 1	0	0	0	0	0	0	0	0	0.175675	0	0	0	0	0	0	0.175675	0	0	0	0	0	2	0.35135	0.35135		Count	N	10	0	90	56923.3	5.69233	-2464.05	2464.05	ROV	2592x1944	North Atlantic	Charlie Gibbs Fracture Zone	ROV Dive 5	057.jpg	Unpublished	Katleen Robert
401	Image 2	0	0	0	0	4.44682	0	0	0	1.48227	0	0	0	0	0	0	0	0	0	0	0	0	2	5.92909	2.96454		Count	N	50	10	40	6746.4	0.67464	-2447.54	2447.54	ROV	2592x1944	North Atlantic	Charlie Gibbs Fracture Zone	ROV Dive 5	070.jpg	Unpublished	Katleen Robert
402	Image 3	0	0	0	0	0	1.47937	0	1.47937	2.95874	0	0	0	0	0	0	0	0	0	0	0	0	3	5.91749	4.43812		Count	N	50	20	30	6759.63	0.675963	-2440.98	2440.98	ROV	2592x1944	North Atlantic	Charlie Gibbs Fracture Zone	ROV Dive 5	075.jpg	Unpublished	Katleen Robert
403	Image 4	0	0	0	0	0.339277	0	0	0	0	0	0	0	0	0	0	0	0	0	0	0	0	1	0.339277	0.339277		Count	N	30	10	60	29474.5	2.94745	-2401.53	2401.53	ROV	2592x1944	North Atlantic	Charlie Gibbs Fracture Zone	ROV Dive 5	107.jpg	Unpublished	Katleen Robert
404	Image 5	0	0	0	0	0.454587	0	0	0	0	0	0	0	0	0	0	0	0	0	0	0	0	1	0.454587	0.227293		Count	N	10	10	80	43996	4.3996	-2375.44	2375.44	ROV	2592x1944	North Atlantic	Charlie Gibbs Fracture Zone	ROV Dive 5	122.jpg	Unpublished	Katleen Robert
409	Image 11	0.106254	0.106254	0	0	0.95629	0.106254	0	0	0.850036	0	0	0	0	0	0	0	0	0	0	0	0	5	2.12509	0.531272		Count	N	30	70	0	94113.7	9.41137	-1905.22	1905.22	ROV	2592x1944	North Atlantic	Charlie Gibbs Fracture Zone	ROV Dive 5	547.jpg	Unpublished	Katleen Robert
410	Image 12	0.300962	0	0	0	0	0.300962	0	0	0.300962	0	0	0	0	0	0	0	0	0	0	0	0	3	0.902885	0.902885		Count	N	5	95	0	33226.8	3.32268	-1860.91	1860.91	ROV	2592x1944	North Atlantic	Charlie Gibbs Fracture Zone	ROV Dive 5	565.jpg	Unpublished	Katleen Robert
411	Image 13	0.401778	0	0	0	0	0	0	0	0	0	0	0	0	0	0	0	0	0	0	0	0	1	0.401778	0.401778		Count	N	0	100	0	24889.3	2.48893	-1829.46	1829.46	ROV	2592x1944	North Atlantic	Charlie Gibbs Fracture Zone	ROV Dive 5	572.jpg	Unpublished	Katleen Robert
413	Image 15	1.32274	0.440914	0	1.32274	0.440914	0	0.881829	0	0	0	0	0	0	0	0	0.440914	0	0	0	0	0	6	4.85006	2.64549		Count	N	100	0	0	22680.1	2.26801	-1521.06	1521.06	ROV	2592x1944	North Atlantic	Charlie Gibbs Fracture Zone	ROV Dive 5	694.jpg	Unpublished	Katleen Robert
414	Image 16	0.601487	0	0	1.20297	0	0	0	0	0	0	0	0	0	0	0	0.300743	0	0	0	0	0	3	2.1052	0.90223		Count	N	95	0	5	33250.9	3.32509	-1518.45	1518.45	ROV	2592x1944	North Atlantic	Charlie Gibbs Fracture Zone	ROV Dive 5	695.jpg	Unpublished	Katleen Robert
416	Image 20	0	0	0	0	0.0557469	0	0	0	0	0	0	0.0557469	0	0	0	0	0	0	0	0	0	2	0.111494	0.111494		Count	N	10	30	60	179382	17.9382	-1689.77	1689.77	ROV	2592x1944	North Atlantic	Charlie Gibbs Fracture Zone	ROV Dive 5	612.JPG	Unpublished	Katleen Robert
417	Image 21	0	0	0	0	0	0	0	0	0	0	0	0.305328	0	0	0	0.305328	0	0	0	0	0	2	0.610655	0.610655		Count	N	0	80	20	32751.7	3.27517	-1566.52	1566.52	ROV	2592x1944	North Atlantic	Charlie Gibbs Fracture Zone	ROV Dive 5	658.JPG	Unpublished	Katleen Robert
418	Image 22	0.935789	0	0	0	0	0	1.87158	0	0	0	0	0	0	0	0	0.935789	0	0	0	0	0	3	3.74316	2.80737		Count	N	0	90	10	10686.2	1.06862	-1565.03	1565.03	ROV	2592x1944	North Atlantic	Charlie Gibbs Fracture Zone	ROV Dive 5	659.JPG	Unpublished	Katleen Robert
419	Image 23	0	0	0.154182	0.154182	1.38764	0	0	0	0	0	0	0	0	0	0	0	0	0	0	0	0	3	1.696	0.462546		Count	N	25	75	0	64858.4	6.48584	-1190.94	1190.94	ROV	2592x1944	North Atlantic	Charlie Gibbs Fracture Zone	ROV Dive 5	830.JPG	Unpublished	Katleen Robert
420	Image 24	0	0	0	0	1.73429	0	0	0	0	0	0	0	0	0	0	0	0	0	0	0	0	1	1.73429	0.123878		Count	N	60	40	0	80724.9	8.07249	-2637.51	2637.51	ROV	2592x1944	North Atlantic	Charlie Gibbs Fracture Zone	ROV Dive 6	ROV_6 698.jpg	Unpublished	Katleen Robert
421	Image 25	0	0	0	0	0.731913	0	0.731913	0	2.19574	0	0	0	0	0	0	0.731913	0	0	0	0	0	4	4.39148	2.92765		Count	N	80	0	20	13662.8	1.36628	-2187.72	2187.72	ROV	2592x1944	North Atlantic	Charlie Gibbs Fracture Zone	ROV Dive 6	ROV_6 865.jpg	Unpublished	Katleen Robert
422	Image 26	0.886214	0	0	0	0	0	0	1.18162	0.886214	0	0	0	0	0	0	0	0	0	0	0	0	3	2.95405	0.886214		Count	N	20	10	70	33851.9	3.38519	-2092.31	2092.31	ROV	2592x1944	North Atlantic	Charlie Gibbs Fracture Zone	ROV Dive 6	ROV_6 956.jpg	Unpublished	Katleen Robert
423	Image 27	0.223007	0	0	0	0.223007	0	0	0.223007	0.669022	0	0	0	0	0	0	0	0	0	0	0	0	4	1.33804	0.892029		Count	N	20	10	70	44841.6	4.48416	-2090.36	2090.36	ROV	2592x1944	North Atlantic	Charlie Gibbs Fracture Zone	ROV Dive 6	ROV_6 958.jpg	Unpublished	Katleen Robert
425	Image 29	0	0	0	0	0	0.112129	0	0	3.47599	0	0	0	0.448515	0	0	0	0	0	0	0	0	3	4.03664	0.336386		Count	N	90	5	5	89183.2	8.91832	-1627.5	1627.5	ROV	2592x1944	North Atlantic	Charlie Gibbs Fracture Zone	ROV Dive 6	ROV_6 1343.jpg	Unpublished	Katleen Robert
426	Image 30	1.08314	2.16629	1.08314	4.33258	1.08314	0	3.24943	0	0	0	0	0	0	0	0	1.08314	0	0	0	0	0	7	14.0809	7.58201		Count	N	80	10	10	9232.38	0.923238	-1400.7	1400.7	ROV	2592x1944	North Atlantic	Charlie Gibbs Fracture Zone	ROV Dive 7	ROV_7 127.jpg	Unpublished	Katleen Robert
427	Image 31	0	0	0	0	2.71721	0	0.679302	0	0.679302	0	0	0.679302	0	0	0	0	0	0	0	0	0.679302	5	5.43442	3.39651		Count	N	90	5	5	14721	1.4721	-1349.43	1349.43	ROV	2592x1944	North Atlantic	Charlie Gibbs Fracture Zone	ROV Dive 7	ROV_7 194.jpg	Unpublished	Katleen Robert
428	Image 32	0	0	0	0.111742	0.167613	0.0558709	0.838064	0	0	0	0	0	0	0	0	0.0558709	0	0	0	0	0	5	1.22916	0.279355		Count	N	50	10	40	178984	17.8984	-1281.64	1281.64	ROV	2592x1944	North Atlantic	Charlie Gibbs Fracture Zone	ROV Dive 7	ROV_7 274.jpg	Unpublished	Katleen Robert
430	Image 34	1.64641	0	0	0	0	0	3.29282	0	0	0	0	0	0	0	0	0	0	0	0	0	0	2	4.93922	3.29282		Count	N	0	20	80	6073.83	0.607383	-1193.1	1193.1	ROV	2592x1944	North Atlantic	Charlie Gibbs Fracture Zone	ROV Dive 7	ROV_7 441.jpg	Unpublished	Katleen Robert
431	Image 37	0.209322	0	0	0	0	0.209322	0	0	0.209322	0	0	0	0	0	0	0	0	0	0	0	0	3	0.627966	0.627966		Count	N	80	10	10	47773.3	4.77733	-1350.02	1350.02	ROV	2592x1944	North Atlantic	Charlie Gibbs Fracture Zone	ROV Dive 7	ROV_7 759.jpg	Unpublished	Katleen Robert
432	Image 38	0.451676	0	0	0.225838	0	0	0	0	0.225838	0	0	0	0	0	0	0.677514	0	0	0	0	0	4	1.58087	0.903352		Count	N	60	0	40	44279.5	4.42795	-1077.68	1077.68	ROV	2592x1944	North Atlantic	Charlie Gibbs Fracture Zone	ROV Dive 8	ROV_8 326.jpg	Unpublished	Katleen Robert
433	Image 39	0.731737	0	0	0.182934	0	0	0.182934	0	0	0	0	0	0	0	0	0	0	0	0	0	0.182934	4	1.28054	0.731737		Count	N	60	10	30	54664.4	5.46644	-1031.97	1031.97	ROV	2592x1944	North Atlantic	Charlie Gibbs Fracture Zone	ROV Dive 8	ROV_8 369.jpg	Unpublished	Katleen Robert
434	Image 40	0.508088	0	0	1.52426	0	0	0	0.508088	0	0	0	0	0	0	0	0	0	0	0	0	0	3	2.54044	1.52426		Count	N	0	5	95	19681.6	1.96816	-977.761	977.761	ROV	2592x1944	North Atlantic	Charlie Gibbs Fracture Zone	ROV Dive 8	ROV_8 404.jpg	Unpublished	Katleen Robert
435	Image 41	0	0	0	0	0	0	0	3.76048	0	0	0	0	0	0	0	0	0	0	0	0	0	1	3.76048	0.752097		Count	N	0	0	100	13296.2	1.32962	-912.383	912.383	ROV	2592x1944	North Atlantic	Charlie Gibbs Fracture Zone	ROV Dive 8	ROV_8 442.jpg	Unpublished	Katleen Robert
436	Image 42	0	0	0	0	1.66051	0	0	0	1.66051	0	0	0.332102	0	0	0	0	0	0	0	0	0	3	3.65313	0.996307		Count	N	100	0	0	30111.2	3.01112	-2227.46	2227.46	ROV	2592x1944	North Atlantic	Charlie Gibbs Fracture Zone	ROV Dive 9	ROV_09 316.jpg	Unpublished	Katleen Robert
437	Image 43	0.597873	0	0	0	2.09255	0	0.298936	0	1.49468	0	0	0	0	0	0	0	0	0	0	0	0	4	4.48405	1.19575		Count	N	100	0	0	33451.9	3.34519	-2226.06	2226.06	ROV	2592x1944	North Atlantic	Charlie Gibbs Fracture Zone	ROV Dive 9	ROV_09 349.jpg	Unpublished	Katleen Robert
438	Image 44	0.0809409	0.242823	0	0	1.61882	0	0.0809409	0	0.161882	0	0	0	0	0	0	0	0	0	0	0	0	5	2.1854	0.404704		Count	M	85	10	5	123547	12.3547	-2117.97	2117.97	ROV	2592x1944	North Atlantic	Charlie Gibbs Fracture Zone	ROV Dive 9	ROV_09 587.jpg	Unpublished	Katleen Robert
439	Image 46	0	0	0	0	1.51621	0	0	0	0	0	0	0	0	0	0	0	0	0	0	0	0	1	1.51621	0.189526		Count	M	30	30	40	52763.1	5.27631	-2064.6	2064.6	ROV	2592x1944	North Atlantic	Charlie Gibbs Fracture Zone	ROV Dive 9	ROV_09 612.jpg	Unpublished	Katleen Robert
440	Image 47	0.378261	1.13478	0	0	1.89131	0	1.13478	0	0.378261	0	0	0	0	0	0	0	0	0	0	0	0	5	4.91739	1.89131		Count	M	100	0	0	26436.8	2.64368	-1921.52	1921.52	ROV	2592x1944	North Atlantic	Charlie Gibbs Fracture Zone	ROV Dive 9	ROV_09 825.jpg	Unpublished	Katleen Robert
441	Image 48	0	12.6079	0	0	10.8068	0	0	0	0.900563	0	0	0	0	0	0	0.900563	0	0	0	0	1.80113	5	27.0169	4.50281		Count	M	100	0	0	11104.2	1.11042	-1834.39	1834.39	ROV	2592x1944	North Atlantic	Charlie Gibbs Fracture Zone	ROV Dive 9	ROV_09 1103.jpg	Unpublished	Katleen Robert
442	Image 49	0.271689	0.271689	0	0	6.24885	0	0	0	0	0	0	0	0	0	0	0	0	0	0	0	0	3	6.79223	0.815067		Count	M	95	0	5	36806.8	3.68068	-2065.68	2065.68	ROV	2592x1944	North Atlantic	Charlie Gibbs Fracture Zone	ROV Dive 9	ROV_09 1204.jpg	Unpublished	Katleen Robert
443	Image 50	0	0	0	0	2.58345	0	2.58345	0	0.861149	0	0	0	0	0	0	0	0	0	0	0.574099	0.28705	5	6.88919	1.43525		Count	M	95	0	5	34837.2	3.48372	-1918.88	1918.88	ROV	2592x1944	North Atlantic	Charlie Gibbs Fracture Zone	ROV Dive 9	ROV_09 1263.jpg	Unpublished	Katleen Robert
444	Image 51	0.979097	0	0	1.17492	0	0	0.195819	0	0	0	0	0	0	0	0	0	0	0	0	0	0	3	2.34983	0.587458		Count	N	20	60	20	51067.4	5.10674	-1363.45	1363.45	ROV	2592x1944	North Atlantic	Charlie Gibbs Fracture Zone	ROV Dive 7	ROV_7 753.jpg	Unpublished	Katleen Robert
445	Image 52	0.184172	0	0	3.68344	0	0	0.184172	0	0	0	0	0	0	0	0	0	0	0	0	0	0	3	4.05179	0.552517		Count	N	90	0	10	54297	5.4297	-1363.6	1363.6	ROV	2592x1944	North Atlantic	Charlie Gibbs Fracture Zone	ROV Dive 7	ROV_7 889.jpg	Unpublished	Katleen Robert
446	Image 53	0.489287	0	0	0	0	0	0	0	0	0	0	0	0	0	0	0	0	0	0	0	0	1	0.489287	0.489287		Count	N	0	5	95	20437.9	2.04379	-1974.28	1974.28	ROV	2592x1944	North Atlantic	Charlie Gibbs Fracture Zone	ROV Dive 8	ROV_8 088.jpg	Unpublished	Katleen Robert
447	Image 54	0.140111	0	0	0	0.140111	0	0	0	0.140111	0	0	0	0	0	0	0	0	0	0	0	0	3	0.420334	0.420334		Count	N	20	20	60	71371.8	7.13718	-1146.47	1146.47	ROV	2592x1944	North Atlantic	Charlie Gibbs Fracture Zone	ROV Dive 8	ROV_8 294.jpg	Unpublished	Katleen Robert
448	Image 55	0.363265	0	0	0	1.45306	0	0	0	1.08979	0	0	0	0	0	0	0	0	0	0	0	0	3	2.90612	0.544897		Count	N	95	0	5	55056.3	5.50563	-2231.89	2231.89	ROV	2592x1944	North Atlantic	Charlie Gibbs Fracture Zone	ROV Dive 9	ROV_09 177.jpg	Unpublished	Katleen Robert
449	Image 56	0	0	0	0	0	0	0	0	1.71658	0	0	0	0	0	0	0	0	0	0	0	0	1	1.71658	0.286097		Count	N	100	0	0	34953.2	3.49532	-2227.39	2227.39	ROV	2592x1944	North Atlantic	Charlie Gibbs Fracture Zone	ROV Dive 9	ROV_09 320.jpg	Unpublished	Katleen Robert
450	Image 1	0	0	0	0	0	0	0	0	0	0	0	0	0	0	0	0	0	0	0	0	0.128641	1	0.128641	0.128641		count	N	30	10	60	77735.7	7.77357	615.982	615.982	ROV	2592x1944	Northeast Atlantic	Rockall Escarpment	ROV Dive 2	IMG_0147.jpg	unpublished	Katleen Robert
451	Image 2	0	0	0	0	0	0.945541	0	0	0	0	0	0	0	0	0	0.163024	0	0	0	0	0	2	1.10857	0.0652097		count	N	90	10	0	306703	30.6703	591.098	591.098	ROV	2592x1944	Northeast Atlantic	Rockall Escarpment	ROV Dive 2	IMG_0178.jpg	unpublished	Katleen Robert
452	Image 3	0	0	0	0	0	0	0	0	0	0	0	0	0	0	0	0.337198	0	0	0	0	0	1	0.337198	0.168599		count	N	5	85	10	59312.3	5.93123	629.84	629.84	ROV	2592x1944	Northeast Atlantic	Rockall Escarpment	ROV Dive 3	IMG_0297.jpg	unpublished	Katleen Robert
453	Image 4	0	0	0	0	0	0	0	0	0	0	0	0	0	0	0	0.192078	0	0	0	0	0	1	0.192078	0.0960388		count	N	5	85	10	104125	10.4125	627.368	627.368	ROV	2592x1944	Northeast Atlantic	Rockall Escarpment	ROV Dive 3	IMG_0309.jpg	unpublished	Katleen Robert
454	Image 5	0.0388328	0	0	0	0	0.698991	0	0	0	0	0	0	0	0	0	0.194164	0	0	0	0	0	3	0.931988	0.0582493		count	N	100	0	0	515028	51.5028	582.74	582.74	ROV	2592x1944	Northeast Atlantic	Rockall Escarpment	ROV Dive 3	IMG_0387.jpg	unpublished	Katleen Robert
455	Image 6	0	0	0	0	0	0	0	0	0	0	0	0	0	0	0	2.75707	0	0	0	0	0.689267	2	3.44633	1.37853		count	N	0	80	20	14508.2	1.45082	596.525	596.525	ROV	2592x1944	Northeast Atlantic	Rockall Escarpment	ROV Dive 4	IMG_0456.jpg	unpublished	Katleen Robert
456	Image 7	0	0	0	0	0	0	0	0	0	0	0	0	0	0	0	0.17825	0	0	0	0	0	1	0.17825	0.0594168		count	N	0	10	90	168302	16.8302	602.968	602.968	ROV	2592x1944	Northeast Atlantic	Rockall Escarpment	ROV Dive 6	IMG_0726.jpg	unpublished	Katleen Robert
457	Image 8	0.23676	0	0	0	0	0	0	0	0	0	0	0	0	0	0	0	0	0	0	0	0	1	0.23676	0.23676		count	N	0	95	5	42236.8	4.22368	862.69	862.69	ROV	2592x1944	Northeast Atlantic	Rockall Escarpment	ROV Dive 7	IMG_1137.jpg	unpublished	Katleen Robert
458	Image 9	97.9795	0	0	0	0	0	0	0	0	0	0	0	0	0	0	0	0	0	0	0	0	1	97.9795	1.08866		count	N	100	0	0	9185.59	0.918559	989.962	989.962	ROV	2592x1944	Northeast Atlantic	Rockall Escarpment	ROV Dive 8	IMG_1168.jpg	unpublished	Katleen Robert
459	Image 10	25.4049	0	0	0	0	0	0	0	0	0.529268	0	0	0	0	0	0	0	0	0	0	0.529268	3	26.4634	1.5878		count	N	90	10	0	18894	1.8894	929.18	929.18	ROV	2592x1944	Northeast Atlantic	Rockall Escarpment	ROV Dive 8	IMG_1206.jpg	unpublished	Katleen Robert
460	Image 11	4.58521	0	0	0.218344	0.109172	0	0	0	0	0	0	0	0	0	0	0	0	0	0	0	0	3	4.91273	0.327515		count	N	0	90	10	91598.8	9.15988	899.696	899.696	ROV	2592x1944	Northeast Atlantic	Rockall Escarpment	ROV Dive 8	IMG_1292.jpg	unpublished	Katleen Robert
461	Image 12	0.954682	0	0	0.318227	0.212152	0	0	0	0	0	0	0	0	0	0	0	0	0	0	0	0	3	1.48506	0.318227		count	N	0	80	20	94272.2	9.42722	895.294	895.294	ROV	2592x1944	Northeast Atlantic	Rockall Escarpment	ROV Dive 8	IMG_1299.jpg	unpublished	Katleen Robert
462	Image 13	2.98951	0	0	0.527561	0.351707	0.175854	0	0	0	0	0	0	0	0	0	0	0	0	0	0	1.58268	5	5.62732	0.879268		count	M	80	20	0	56865.5	5.68655	832.152	832.152	ROV	2592x1944	Northeast Atlantic	Rockall Escarpment	ROV Dive 8	IMG_1377.jpg	unpublished	Katleen Robert
463	Image 14	4.50825	0	0	0.830468	0.593191	0.118638	0	0	0	0	0	0	0	0	0	0	0	0	0	0	0.237276	5	6.28783	0.593191		count	M	60	40	0	84289.9	8.42899	880.72	880.72	ROV	2592x1944	Northeast Atlantic	Rockall Escarpment	ROV Dive 8	IMG_1474.jpg	unpublished	Katleen Robert
464	Image 15	0	0	0	0	0	1.08888	0	0	0	0	0	0	0	0	0	0	0	0	0	0	0	1	1.08888	0.36296		count	N	0	0	100	27551.2	2.75512	1142.96	1142.96	ROV	2592x1944	Northeast Atlantic	Rockall Escarpment	ROV Dive 8	IMG_1616.jpg	unpublished	Katleen Robert
465	Image 16	0.826578	0	0	0	0.165316	0.165316	0	0	0	0	0	0	0	0	0	0	0	0	0	0	0	3	1.15721	0.495947		count	N	10	20	70	60490.4	6.04904	1071.66	1071.66	ROV	2592x1944	Northeast Atlantic	Rockall Escarpment	ROV Dive 8	IMG_1733.jpg	unpublished	Katleen Robert
466	Image 17	0.72592	0	0	0	0	1.08888	0	0	0.36296	0	0	0.36296	0	0	0	0	0	0	0	0	0	4	2.54072	1.45184		count	N	0	90	10	27551.2	2.75512	1049.73	1049.73	ROV	2592x1944	Northeast Atlantic	Rockall Escarpment	ROV Dive 8	IMG_1799.jpg	unpublished	Katleen Robert
467	Image 18	2.97975	0	0	0	0	1.1919	0	0	0	0	0	0	0	0	0	0	0	0	0	0	1.78785	3	5.9595	1.78785		count	N	0	90	10	16779.9	1.67799	1048.81	1048.81	ROV	2592x1944	Northeast Atlantic	Rockall Escarpment	ROV Dive 8	IMG_1800.jpg	unpublished	Katleen Robert
468	Image 19	0.224258	0	0	0	0	0.224258	0	0	0	0	0	0	0	0	0	0	0	0	0	0	0	2	0.448515	0.224258		count	N	0	90	10	89183.2	8.91832	1043.57	1043.57	ROV	2592x1944	Northeast Atlantic	Rockall Escarpment	ROV Dive 8	IMG_1807.jpg	unpublished	Katleen Robert
469	Image 20	0.271203	0.0904011	0	0	0.0452005	0.180802	0	0	0	0	0	0	0	0	0	0	0	0	0	0	0.0904011	5	0.678008	0.226003		count	N	0	90	10	221236	22.1236	1006.65	1006.65	ROV	2592x1944	Northeast Atlantic	Rockall Escarpment	ROV Dive 8	IMG_1840.jpg	unpublished	Katleen Robert
470	Image 21	0.478588	0.191435	0	0	0	0.287153	0	0	0	0	0	0	0	0	0	0	0	0	0	0	0.191435	4	1.14861	0.38287		count	N	0	90	10	104474	10.4474	1004.42	1004.42	ROV	2592x1944	Northeast Atlantic	Rockall Escarpment	ROV Dive 8	IMG_1845.jpg	unpublished	Katleen Robert
471	Image 22	0.456741	0	0	0	0.152247	1.06573	0	0	0.761236	0	0	0.152247	0	0	0	0.152247	0	0	0	0	0	6	2.74045	0.913483		count	N	0	90	10	65682.7	6.56827	1003.42	1003.42	ROV	2592x1944	Northeast Atlantic	Rockall Escarpment	ROV Dive 8	IMG_1909.jpg	unpublished	Katleen Robert
472	Image 23	0.135655	0	0	0.101741	0.373051	0.373051	0	0	0	0	0	0	0	0	0	0	0	0	0	0	0.0339137	5	1.01741	0.169569		count	M	20	30	50	294866	29.4866	921.844	921.844	ROV	2592x1944	Northeast Atlantic	Rockall Escarpment	ROV Dive 9	IMG_1973.jpg	unpublished	Katleen Robert
473	Image 24	0.137412	0	0	0.183216	0.320629	0.503845	0	0	0	0	0	0	0	0	0	0	0	0	0	0	0	4	1.1451	0.183216		count	M	20	30	50	218321	21.8321	921.215	921.215	ROV	2592x1944	Northeast Atlantic	Rockall Escarpment	ROV Dive 9	IMG_1977.jpg	unpublished	Katleen Robert
474	Image 25	0.0550574	0	0	0	0	1.15621	0	0	0	0	0	0	0	0	0	0	0	0	0	0	0	2	1.21126	0.110115		count	N	10	10	80	181629	18.1629	915.336	915.336	ROV	2592x1944	Northeast Atlantic	Rockall Escarpment	ROV Dive 9	IMG_1991.jpg	unpublished	Katleen Robert
475	Image 26	0	0	0	0	0	0	0	0	0	0	0	0	0	0	0	0.441419	0	0	0	0	0	1	0.441419	0.0882838		count	N	0	0	100	113271	11.3271	871.18	871.18	ROV	2592x1944	Northeast Atlantic	Rockall Escarpment	ROV Dive 9	IMG_2110.jpg	unpublished	Katleen Robert
477	Image 28	0	0	0	0	0	0	0	0	0	0	0	0	0	0	0	3.70706	0	0	0	0	0	1	3.70706	0.0607715		count	N	0	5	95	164551	16.4551	867.562	867.562	ROV	2592x1944	Northeast Atlantic	Rockall Escarpment	ROV Dive 9	IMG_2158.jpg	unpublished	Katleen Robert
478	Image 29	0	0	0	0	0	0	0	0	0	0	0	0	0	0	0	5.9985	0	0	0	0	0	1	5.9985	0.0882133		count	N	0	5	95	113362	11.3362	867.636	867.636	ROV	2592x1944	Northeast Atlantic	Rockall Escarpment	ROV Dive 9	IMG_2162.jpg	unpublished	Katleen Robert
479	Image 30	0	0	0	0	0	0	0	0	0	0	0	0	0	0	0	18.1325	0	0	0	0	0	1	18.1325	0.120883		count	N	0	5	95	82724.6	8.27246	866.06	866.06	ROV	2592x1944	Northeast Atlantic	Rockall Escarpment	ROV Dive 9	IMG_2169.jpg	unpublished	Katleen Robert
480	Image 31	0.768827	0	0	0.153765	1.38389	0.615061	0.153765	0	0	0	0	0	0	0	0	0	0	0	0	0	0.153765	6	3.22907	0.922592		count	M	15	5	80	65034.2	6.50342	805.43	805.43	ROV	2592x1944	Northeast Atlantic	Rockall Escarpment	ROV Dive 9	IMG_2281.jpg	unpublished	Katleen Robert
481	Image 32	0	0	0	0	0	0	0	0	0	0	0	0	0	0	0	1.99166	0	0	0	0	0	1	1.99166	0.142261		count	N	0	5	95	70293.2	7.02932	846.304	846.304	ROV	2592x1944	Northeast Atlantic	Rockall Escarpment	ROV Dive 9	IMG_2382.jpg	unpublished	Katleen Robert
482	Image 33	0.158412	0	0	0	0.63365	0.316825	0	0	0	0	0	0	0	0	0	2.21777	0	0	0	0	0	4	3.32666	0.63365		count	N	10	20	70	63126.4	6.31264	825.625	825.625	ROV	2592x1944	Northeast Atlantic	Rockall Escarpment	ROV Dive 9	IMG_2403.jpg	unpublished	Katleen Robert
483	Image 34	0.293841	0	0	0	0.146921	0.440762	0	0	0.146921	0	0	0	0	0	0	4.84838	0	0	0	0	0	5	5.87683	0.734603		count	N	10	20	70	68064	6.8064	821.812	821.812	ROV	2592x1944	Northeast Atlantic	Rockall Escarpment	ROV Dive 9	IMG_2410.jpg	unpublished	Katleen Robert
484	Image 35	0	0	0	0.185767	1.1146	0.371534	0.185767	0	0.185767	0.371534	0	0	0	0	0	2.7865	0	0	0	0	0.185767	8	5.38724	1.48613		count	N	10	20	70	53830.9	5.38309	817.154	817.154	ROV	2592x1944	Northeast Atlantic	Rockall Escarpment	ROV Dive 9	IMG_2417.jpg	unpublished	Katleen Robert
485	Image 36	0.489358	0	0	0.489358	3.42551	0	0	0	0	0	0	0	0	0	0	0.489358	0	0	0	0	0	4	4.89358	1.95743		count	N	80	20	0	20434.9	2.04349	1512.84	1512.84	ROV	2592x1944	Northeast Atlantic	Rockall Escarpment	ROV Dive 10	IMG_2678.jpg	unpublished	Katleen Robert
486	Image 37	1.47611	0	0	3.44426	0.984074	1.47611	0	0	0	0	0.984074	0	0	0	0	0.492037	0	0	0	0	0.984074	7	9.84074	3.44426		count	M	100	0	0	20323.7	2.03237	1456.87	1456.87	ROV	2592x1944	Northeast Atlantic	Rockall Escarpment	ROV Dive 10	IMG_2771.jpg	unpublished	Katleen Robert
487	Image 38	0.241643	0	0	0	0.362464	0	0	0	0	0	0	0	0	0	0	0	0	0	0	0	0	2	0.604106	0.241643		count	N	5	0	95	82766.9	8.27669	1445.02	1445.02	ROV	2592x1944	Northeast Atlantic	Rockall Escarpment	ROV Dive 10	IMG_2794.jpg	unpublished	Katleen Robert
488	Image 39	2.24051	0	0	0	2.7384	0	0.746837	0	0	0	0	0.995783	0	0	0.248946	0.248946	0	0	0	0	0	6	7.21943	1.49367		count	M	0	85	15	40169.4	4.01694	1349.53	1349.53	ROV	2592x1944	Northeast Atlantic	Rockall Escarpment	ROV Dive 10	IMG_2881.jpg	unpublished	Katleen Robert
489	Image 40	2.06496	0	0	0.412991	3.30393	0.825982	0	0	0	0	0	0	0	0	0	0	0	0	0	0	0	4	6.60786	0.825982		count	M	0	70	30	48427.2	4.84272	1346.04	1346.04	ROV	2592x1944	Northeast Atlantic	Rockall Escarpment	ROV Dive 10	IMG_2910.jpg	unpublished	Katleen Robert
490	Image 41	1.33533	0	0	0.53413	4.00598	0	0	0	0	0	0	0	0	0	0	0	0	0	0	0	0	3	5.87543	0.801195		count	M	0	70	30	37444.1	3.74441	1344.53	1344.53	ROV	2592x1944	Northeast Atlantic	Rockall Escarpment	ROV Dive 10	IMG_2916.jpg	unpublished	Katleen Robert
491	Image 42	1.85856	0	0	0	2.78784	0	0	0	0	0	0	1.85856	0	0	0.929279	0	0	0	0	0	0	4	7.43423	3.71712		count	N	0	20	80	10761	1.0761	1336.15	1336.15	ROV	2592x1944	Northeast Atlantic	Rockall Escarpment	ROV Dive 10	IMG_3014.jpg	unpublished	Katleen Robert
492	Image 43	0	0	0	0.966405	1.93281	0.966405	0	0	0	0	0	0	0	0	0	0	0	0	0	0	0	3	3.86562	2.89922		count	N	0	10	90	10347.6	1.03476	1338.53	1338.53	ROV	2592x1944	Northeast Atlantic	Rockall Escarpment	ROV Dive 10	IMG_3048.jpg	unpublished	Katleen Robert
493	Image 44	1.46164	0	0	0	0	0.487214	0	0	0	0	0.487214	0	0	0	0	0.487214	0	0	1.94886	0	0	5	4.87214	2.43607		count	M	80	20	0	20524.8	2.05248	1445.99	1445.99	ROV	2592x1944	Northeast Atlantic	Rockall Escarpment	ROV Dive 10	IMG_3946.jpg	unpublished	Katleen Robert
494	Image 45	4.29728	0.238738	0	0	1.67116	0.477475	0.238738	0	0	0	0	0.238738	0	0	0	0	0	0	0	0	0.716213	7	7.87834	1.67116		count	M	0	95	5	41887	4.1887	1401.44	1401.44	ROV	2592x1944	Northeast Atlantic	Rockall Escarpment	ROV Dive 10	IMG_4009.jpg	unpublished	Katleen Robert
495	Image 46	0.377392	0	0	0	0.377392	0	0	0	0	0	0	0	0	0	0	0	0	0	0	0	0	2	0.754784	0.754784		count	N	5	20	75	26497.7	2.64977	651.33	651.33	ROV	2592x1944	Northeast Atlantic	Rockall Escarpment	ROV Dive 13	IMG_4024.jpg	unpublished	Katleen Robert
496	Image 47	0	0	0	1.44837	1.93116	0	0	0	0	0	0	0	0	0	0	0	0	0	0	0	0	2	3.37952	0.321859		count	M	0	100	0	62139	6.2139	1400.79	1400.79	ROV	2592x1944	Northeast Atlantic	Rockall Escarpment	ROV Dive 10	IMG_4068.jpg	unpublished	Katleen Robert
497	Image 48	0	0	0	0	0.399456	0.399456	0	0	0	0	0	0	0	0	0	0.199728	0	0	0	0	0	3	0.998641	0.599185		count	N	0	50	50	50068	5.0068	608.88	608.88	ROV	2592x1944	Northeast Atlantic	Rockall Escarpment	ROV Dive 13	IMG_4072.jpg	unpublished	Katleen Robert
498	Image 49	0	0	0	0	0	0.447245	0	0	0	0	0	0	0	0	0	0	0	0	0	0	0	1	0.447245	0.447245		count	N	40	10	50	22359.1	2.23591	563.98	563.98	ROV	2592x1944	Northeast Atlantic	Rockall Escarpment	ROV Dive 13	IMG_4139.jpg	unpublished	Katleen Robert
499	Image 50	0	0	1.04378	0	0	0	0	0	0	0	0	0	0	0	0	0	0	0	0	0	0	1	1.04378	1.04378		count	N	0	0	100	9580.54	0.958054	708.27	708.27	ROV	2592x1944	Northeast Atlantic	Rockall Escarpment	ROV Dive 1	IMG_9780.jpg	unpublished	Katleen Robert
500	Image 1		1.79495	0	0	0	0.598317	3.5899	0	0	0	0	0	0	0	0	0	0	0	1.19663	0	0	4	7.1798	2.39327		% Percent, count	Y	0	90	10	NA	1.67135	-1332.99	1332.99	ROV	2048x1536	Northeast Atlantic	Whittard Canyon	ROV Dive 116	DSCN0137.jpg	Robert et al. 2015	Katleen Robert
501	Image 2		1.79495	0	0	0	0	2.99158	0	0	0	0	0	0	0	0	0.598317	0	0	0	0	0	3	5.38485	1.79495		% Percent, count	Y	0	100	0	NA	1.67135	-1332.61	1332.61	ROV	2048x1536	Northeast Atlantic	Whittard Canyon	ROV Dive 116	DSCN0155.jpg	Robert et al. 2015	Katleen Robert
502	Image 3		0	0	0	0	1.19663	11.9663	0	0	0	0	0	0	0	0	0	0	0	2.99158	0	0	3	16.1546	1.79495		% Percent, count	Y	0	95	5	NA	1.67135	-1326.86	1326.86	ROV	2048x1536	Northeast Atlantic	Whittard Canyon	ROV Dive 116	DSCN0234.jpg	Robert et al. 2015	Katleen Robert
503	Image 4		1.19663	0	0	0	0	5.38485	0	0	0	0	0	0	0	0	0	0	0	0	0	0	2	6.58149	1.19663		% Percent, count	Y	0	100	0	NA	1.67135	-1316.71	1316.71	ROV	2048x1536	Northeast Atlantic	Whittard Canyon	ROV Dive 116	DSCN0273.jpg	Robert et al. 2015	Katleen Robert
504	Image 50		2.99158	0	0	0	2.39327	1.19663	0	0	0	0	0	44.8738	0	0	0.598317	0	0	3.5899	0	0	6	55.6435	3.5899		% Percent, count	Y	20	30	50	NA	1.67135	-1339.63	1339.63	ROV	2048x1536	Northeast Atlantic	Whittard Canyon	ROV Dive 116	DSCN9702.jpg	Robert et al. 2015	Katleen Robert
505	Image 5	0	0	0	0	0	0.949224	0	0	0	0	0	0	0	0	0	0	0	0	0	0	0	1	0.949224	0.474612		Count	N	0	0	100	21069.8	2.10698	-906.5	906.5	ROV	2048x1536	Northeast Atlantic	Whittard Canyon	ROV Dive 116	DSCN0547.jpg	Robert et al. 2015	Katleen Robert
506	Image 6	0	0	0	0	0	1.71661	0	0	0	0	0	0	0	0	0	0	0	0	0	0	0	1	1.71661	0.572205		Count	N	0	0	100	17476.3	1.74763	-904.84	904.84	ROV	2048x1536	Northeast Atlantic	Whittard Canyon	ROV Dive 116	DSCN0552.jpg	Robert et al. 2015	Katleen Robert
507	Image 7	0	14.7309	0	0	0	0	0	0	0	0	0	0	0	0	0	0	0	0	0	0	0	1	14.7309	0.982062		Count	N	95	0	5	10182.7	1.01827	-2466.62	2466.62	ROV	2048x1536	Northeast Atlantic	Whittard Canyon	ROV Dive 117	DSCN0613.jpg	Robert et al. 2015	Katleen Robert
508	Image 8	0	0	0	0	0	0	4.00241	0	0	0	0	0	0	0	0	0	0	0	0	0	0	1	4.00241	0.800482		Count	N	100	0	0	12492.5	1.24925	-2291.16	2291.16	ROV	2048x1536	Northeast Atlantic	Whittard Canyon	ROV Dive 117	DSCN0729.jpg	Robert et al. 2015	Katleen Robert
509	Image 9	0	0	1.40737	0	0	0	0.703687	0	0	0	0	0	0	0	0	0	0	0	0	0	1.40737	3	3.51843	2.11106		Count	N	0	0	100	14210.9	1.42109	-2235.77	2235.77	ROV	2048x1536	Northeast Atlantic	Whittard Canyon	ROV Dive 117	DSCN0827.jpg	Robert et al. 2015	Katleen Robert
510	Image 10	0	0	0	0	0	0	0.878316	0	0	0	0	0	0	0	0	0	0	0	0	0	0	1	0.878316	0.878316		Count	N	100	0	0	11385.4	1.13854	-2162.18	2162.18	ROV	2048x1536	Northeast Atlantic	Whittard Canyon	ROV Dive 117	DSCN0996.jpg	Robert et al. 2015	Katleen Robert
511	Image 11	0	0	0	0	0	0	0	0	0	0	0	0	0	0	0	0	0	0	0	0	0.832994	1	0.832994	0.832994		Count	N	100	0	0	12004.9	1.20049	-2337.57	2337.57	ROV	2048x1536	Northeast Atlantic	Whittard Canyon	ROV Dive 117	DSCN1021.jpg	Robert et al. 2015	Katleen Robert
512	Image 12	0	8.68219	0.667861	0	0	0	2.67144	0	0	0	0	0	0	0	0	0	0	0	0	0	0.667861	4	12.6894	2.67144		Count	M	0	0	100	14973.2	1.49732	-2338.19	2338.19	ROV	2048x1536	Northeast Atlantic	Whittard Canyon	ROV Dive 117	DSCN1215.jpg	Robert et al. 2015	Katleen Robert
513	Image 13	0	4.79794	0.68542	0	0	0	0.68542	0	0	0	0	0	0	0	0	0	0	0	0	0	0.68542	4	6.8542	2.74168		Count	M	0	0	100	14589.6	1.45896	-1955.21	1955.21	ROV	2048x1536	Northeast Atlantic	Whittard Canyon	ROV Dive 117	DSCN1270.jpg	Robert et al. 2015	Katleen Robert
514	Image 14	0	3.47646	0	0	0	0	0	0	0	0	0	0	0	0	0	0	0	0	0	0	0	1	3.47646	0.496637		Count	M	0	0	100	20135.4	2.01354	-1954.39	1954.39	ROV	2048x1536	Northeast Atlantic	Whittard Canyon	ROV Dive 117	DSCN1273.jpg	Robert et al. 2015	Katleen Robert
518	Image 18	0	0	0	0	0	0.288083	0	0	0	0	0	0	0	0	0	0	0	0	0	0	0	1	0.288083	0.288083		Count	N	0	0	100	34712.2	3.47122	-3245.11	3245.11	ROV	2048x1536	Northeast Atlantic	Whittard Canyon	ROV Dive 100	DSCN3543.jpg	Robert et al. 2015	Katleen Robert
519	Image 19	0	0	0	0	0	0	1.64732	0	0	0	0	0	0	0	0	0	0	0	0	0	0	1	1.64732	0.41183		Count	N	0	0	100	24281.8	2.42818	-3187.8	3187.8	ROV	2048x1536	Northeast Atlantic	Whittard Canyon	ROV Dive 100	DSCN3559.jpg	Robert et al. 2015	Katleen Robert
520	Image 20	0	0.319368	0	0	0	0	0	0	0	0	0	0	0	0	0	0	0	0	0	0	0	1	0.319368	0.319368		Count	N	100	0	0	31311.8	3.13118	-3180.71	3180.71	ROV	2048x1536	Northeast Atlantic	Whittard Canyon	ROV Dive 102	DSCN3763.jpg	Robert et al. 2015	Katleen Robert
521	Image 21	0	2.59584	0	0	0	0	0	0	0	0	0	0	0	0	0	0	0	0	0	0	0	1	2.59584	1.29792		Count	N	0	0	100	7704.64	0.770464	-3171.15	3171.15	ROV	2048x1536	Northeast Atlantic	Whittard Canyon	ROV Dive 102	DSCN3771.jpg	Robert et al. 2015	Katleen Robert
522	Image 22	0	0	0	0	0	1.19127	0	0	0	0	0	0	0	0	0	0	0	0	0	0	0	1	1.19127	1.19127		Count	N	0	0	100	8394.43	0.839443	-3142.4	3142.4	ROV	2048x1536	Northeast Atlantic	Whittard Canyon	ROV Dive 102	DSCN3784.jpg	Robert et al. 2015	Katleen Robert
525	Image 25	0	0	0	0	0	0	2.34197	0	0	0	0	0	0	0	0	0	0	0	0	0	0	1	2.34197	2.34197		Count	N	0	0	100	4269.91	0.426991	-2775.78	2775.78	ROV	2048x1536	Northeast Atlantic	Whittard Canyon	ROV Dive 102	DSCN4045.jpg	Robert et al. 2015	Katleen Robert
527	Image 27	0	0	0	0	0	0	1.58542	0	0	0	0	0	0	0	0	0	0	0	0	0	0	1	1.58542	1.58542		Count	N	0	0	100	6307.48	0.630748	-2595.43	2595.43	ROV	2048x1536	Northeast Atlantic	Whittard Canyon	ROV Dive 105	DSCN4513.jpg	Robert et al. 2015	Katleen Robert
531	Image 31	0	0	0	0	0	8.72054	0	0	0	0	0	0	0	0	0	0	0	0	0	0	0	1	8.72054	0.968949		Count	N	70	0	30	10320.5	1.03205	-733.59	733.59	ROV	2048x1536	Northeast Atlantic	Whittard Canyon	ROV Dive 107	DSCN5668.jpg	Robert et al. 2015	Katleen Robert
532	Image 32	0	0	0	0	0	2.78121	0	0	0	0	0	0	0	0	0	0	0	0	0	0	0	1	2.78121	0.695304		Count	N	70	0	30	14382.2	1.43822	-722.54	722.54	ROV	2048x1536	Northeast Atlantic	Whittard Canyon	ROV Dive 107	DSCN5699.jpg	Robert et al. 2015	Katleen Robert
533	Image 33	0	0	0	0	0	2.8834	0	0	0	0	0	0	0	0	0	0	0	0	0	0	0	1	2.8834	2.8834		Count	N	70	0	30	3468.12	0.346812	-701.6	701.6	ROV	2048x1536	Northeast Atlantic	Whittard Canyon	ROV Dive 107	DSCN5742.jpg	Robert et al. 2015	Katleen Robert
534	Image 34	0	0	0	0	0	0	0	0	0	0	0	0	0	0	0	0	0	0	0	0	0.506627	1	0.506627	0.506627		Count	N	0	0	100	19738.4	1.97384	-657.46	657.46	ROV	2048x1536	Northeast Atlantic	Whittard Canyon	ROV Dive 107	DSCN5848.jpg	Robert et al. 2015	Katleen Robert
537	Image 37	0	0	0	0	0	0	0	0	0	0	0	0	0	0	0	0	0	0	0	0	0.814745	1	0.814745	0.814745		Count	N	0	0	100	12273.8	1.22738	-572.96	572.96	ROV	2048x1536	Northeast Atlantic	Whittard Canyon	ROV Dive 107	DSCN5940.jpg	Robert et al. 2015	Katleen Robert
538	Image 38	0	0	0	0	0.973225	0	0	0	0	0	0	0	0	0	0	0	0	0	0	0	0	1	0.973225	0.324408		Count	M	0	0	100	30825.4	3.08254	-1444.18	1444.18	ROV	2048x1536	Northeast Atlantic	Whittard Canyon	ROV Dive 109	DSCN6232.jpg	Robert et al. 2015	Katleen Robert
541	Image 41	0	0	0	0	0	0	0.481447	0	0	0	0	0	0	0	0	0	0	0	0	0	0	1	0.481447	0.481447		Count	N	70	0	30	20770.7	2.07707	-3146.77	3146.77	ROV	2048x1536	Northeast Atlantic	Whittard Canyon	ROV Dive 113	DSCN7104.jpg	Robert et al. 2015	Katleen Robert
542	Image 42	0	0	0	0	0	0	0.677522	0	0	0	0	0	0	0	0	0	0	0	0	0	0	1	0.677522	0.677522		Count	N	20	0	80	14759.7	1.47597	-3143.11	3143.11	ROV	2048x1536	Northeast Atlantic	Whittard Canyon	ROV Dive 113	DSCN7127.jpg	Robert et al. 2015	Katleen Robert
543	Image 43	0	1.19663	0	0	0	0	0	0	0	0	0	0	0	0	0	0	0	0	0	0	0.598317	2	1.79495	1.19663		Count	N	0	0	100	NA	1.67135	-3175.48	3175.48	ROV	2048x1536	Northeast Atlantic	Whittard Canyon	ROV Dive 113	DSCN7369.jpg	Robert et al. 2015	Katleen Robert
544	Image 44	0	0.387409	0	0	0	0	0.387409	12.3971	0	0	0	0	0.387409	0	0	0	0	0	0	0	0	4	13.5593	1.54964		Count	M	0	0	100	25812.5	2.58125	-1293.29	1293.29	ROV	2048x1536	Northeast Atlantic	Whittard Canyon	ROV Dive 114	DSCN8677.jpg	Robert et al. 2015	Katleen Robert
545	Image 45	0	0	0	0	0	1.05797	0	12.1666	0	0	0	0	0	0	0	0	0	0	0	0	0	2	13.2246	1.05797		Count	M	0	0	100	18904.1	1.89041	-1279.99	1279.99	ROV	2048x1536	Northeast Atlantic	Whittard Canyon	ROV Dive 114	DSCN8719.jpg	Robert et al. 2015	Katleen Robert
546	Image 46	0	0	0	0	0	0.575826	0	6.90991	0	0	0	0	0	0	0	0	0	0	0	0	0	2	7.48574	1.15165		Count	M	0	0	100	17366.4	1.73664	-1278.15	1278.15	ROV	2048x1536	Northeast Atlantic	Whittard Canyon	ROV Dive 114	DSCN8727.jpg	Robert et al. 2015	Katleen Robert
547	Image 47	0	2.72878	0	0	0	0	0.545756	10.9151	0	0	0	0	0	0	0	0	0	0	0	0	0	3	14.1897	1.63727		Count	M	0	0	100	18323.2	1.83232	-1277.8	1277.8	ROV	2048x1536	Northeast Atlantic	Whittard Canyon	ROV Dive 114	DSCN8730.jpg	Robert et al. 2015	Katleen Robert
548	Image 48	0	0	0	0	0	0	0	7.13189	0	0	0	0	0	0	0	0	0	0	0	0	0	1	7.13189	0.509421		Count	M	0	0	100	19630.1	1.96301	-1277.13	1277.13	ROV	2048x1536	Northeast Atlantic	Whittard Canyon	ROV Dive 114	DSCN8731.jpg	Robert et al. 2015	Katleen Robert
550	sentry.20151024.112953111541.2724.tif	0	0.0833333	0	0	0.0833333	0	0	0	0	0	0	0	0	0	0	0	0	0	0	0	0	2	0.166667	0.166667		count	N	90	5	5	12	12	599.337	599.337	AUV	HD	NWHI	ACADEMICIAN BERG	sentry.20151024.112953111541.2724.tif	S356-04		NBM
551	sentry.20151024.114739762717.3044.tif	0	0.0833333	0	0	0	0	0.0833333	0	0	0	0	0	0	0	0.0833333	0	0.0833333	0	0	0	0	4	0.333333	0.333333		count	N	95	5	0	12	12	604.659	604.659	AUV	HD	NWHI	ACADEMICIAN BERG	sentry.20151024.114739762717.3044.tif	S356-04		NBM
552	sentry.20151024.115519756115.3182.tif	0	0	0	0.0833333	0	0	0	0	0	0	0	0	0	0	0	0	0	0	0.0833333	0	0	2	0.166667	0.166667		count	N	5	90	5	12	12	602.707	602.707	AUV	HD	NWHI	ACADEMICIAN BERG	sentry.20151024.115519756115.3182.tif	S356-04		NBM
553	sentry.20151024.161322857682.7827.tif	0.166667	0	0	0	0.0833333	0	0	0	0	0	0	0	0	0	0	0	0	0	0	0	0	2	0.25	0.166667		count	N	100	0	0	12	12	597.147	597.147	AUV	HD	NWHI	ACADEMICIAN BERG	sentry.20151024.161322857682.7827.tif	S356-09		NBM
554	sentry.20151024.161516189296.7861.tif	0.0833333	0	0	0	0.166667	0	0	0	0	0	0	0	0	0	0	0	0	0	0.0833333	0	0	3	0.333333	0.25		count	N	100	0	0	12	12	598.111	598.111	AUV	HD	NWHI	ACADEMICIAN BERG	sentry.20151024.161516189296.7861.tif	S356-09		NBM
555	sentry.20151024.162316182361.8005.tif	0	0.333333	0	0	0.416667	0	0	0	0	0	0	0	0	0	0	0	0	0	0	0	0	2	0.75	0.166667		count	N	90	0	10	12	12	600.581	600.581	AUV	HD	NWHI	ACADEMICIAN BERG	sentry.20151024.162316182361.8005.tif	S356-09		NBM
556	sentry.20151024.162456180887.8035.tif	0	0.0833333	0	0	0	0	0	0	0	0	0	0	0	0	0	0	0	0	0	0	0	1	0.0833333	0.0833333		count	N	50	5	45	12	12	600.538	600.538	AUV	HD	NWHI	ACADEMICIAN BERG	sentry.20151024.162456180887.8035.tif	S356-09		NBM
557	sentry.20151024.162729512010.8081.tif	0	0.0833333	0	0	0	0	0	0	0	0	0	0	0	0	0	0	0.0833333	0	0	0	0	2	0.166667	0.166667		count	N	90	5	5	12	12	598.685	598.685	AUV	HD	NWHI	ACADEMICIAN BERG	sentry.20151024.162729512010.8081.tif	S356-09		NBM
558	sentry.20151024.234729058178.16001.tif	0.0833333	0	0	0	0	0	0	0	0	0	0	0	0	0	0	0.166667	0	0	0	0	0	2	0.25	0.166667		count	N	100	0	0	12	12	235.935	235.935	AUV	HD	NWHI	ACADEMICIAN BERG	sentry.20151024.234729058178.16001.tif	S356-18		NBM
559	sentry.20151024.234815724138.16015.tif	0.166667	0	0	0	0.166667	0	0	0	0	0	0	0	0	0	0	0.0833333	0	0	0	0	0	3	0.416667	0.25		count	N	100	0	0	12	12	234.993	234.993	AUV	HD	NWHI	ACADEMICIAN BERG	sentry.20151024.234815724138.16015.tif	S356-18		NBM
560	sentry.20151024.234922389571.16035.tif	0.75	0.0833333	0	0	0	0	0	0	0	0	0	0	0	0	0	0.0833333	0	0	0	0	0	3	0.916667	0.25		count	N	100	0	0	12	12	235.784	235.784	AUV	HD	NWHI	ACADEMICIAN BERG	sentry.20151024.234922389571.16035.tif	S356-18		NBM
561	sentry.20151024.235449050476.16133.tif	0.166667	0	0	0	0	0	0	0	0	0	0	0	0	0	0	0	0	0	0	0	0	1	0.166667	0.0833333		count	N	100	0	0	12	12	235.944	235.944	AUV	HD	NWHI	ACADEMICIAN BERG	sentry.20151024.235449050476.16133.tif	S356-18		NBM
562	sentry.20151024.235455717142.16135.tif	0.166667	0	0	0	0.0833333	0.0833333	0	0	0	0	0	0	0	0	0	0	0	0	0	0	0	3	0.333333	0.25		count	N	100	0	0	12	12	235.932	235.932	AUV	HD	NWHI	ACADEMICIAN BERG	sentry.20151024.235455717142.16135.tif	S356-18		NBM
563	sentry.20151024.235555716097.16153.tif	0.333333	0	0	0	0	0	0	0	0	0	0	0	0	0	0	0	0	0	0	0	0	1	0.333333	0.0833333		count	N	100	0	0	12	12	235.52	235.52	AUV	HD	NWHI	ACADEMICIAN BERG	sentry.20151024.235555716097.16153.tif	S356-18		NBM
564	sentry.20151024.235842379828.16203.tif	0.05	0	0	0	0	0	0	0	0	0	0	0	0	0	0	0	0	0	0	0	0	1	0.05	0.05		count	N	100	0	0	20	20	235.453	235.453	AUV	HD	NWHI	ACADEMICIAN BERG	sentry.20151024.235842379828.16203.tif	S356-18		NBM
565	sentry.20151024.235942378782.16221.tif	0.0833333	0.0833333	0	0	0	0	0	0	0	0	0	0	0	0	0	0.166667	0	0	0	0	0	3	0.333333	0.25		count	N	100	0	0	12	12	235.551	235.551	AUV	HD	NWHI	ACADEMICIAN BERG	sentry.20151024.235942378782.16221.tif	S356-18		NBM
566	sentry.20151025.000155709852.16261.tif	0.0833333	0	0	0	0	0	0.0833333	0	0	0	0	0	0	0	0	0	0	0	0	0	0	2	0.166667	0.166667		count	N	100	0	0	12	12	235.605	235.605	AUV	HD	NWHI	ACADEMICIAN BERG	sentry.20151025.000155709852.16261.tif	S356-18		NBM
567	sentry.20151025.011618967460.17600.tif	0.0833333	0	0	0.0833333	0	0	0	0	0	0	0	0	0	0	0	0	0	0	0	0	0	2	0.166667	0.166667		count	N	95	0	5	12	12	235.416	235.416	AUV	HD	NWHI	ACADEMICIAN BERG	sentry.20151025.011618967460.17600.tif	S356-20		NBM
568	sentry.20151025.012012296973.17670.tif	0.166667	0	0	0	0	0	0	0	0	0	0	0	0	0	0	0.0833333	0	0	0	0	0	2	0.25	0.166667		count	N	100	0	0	12	12	235.219	235.219	AUV	HD	NWHI	ACADEMICIAN BERG	sentry.20151025.012012296973.17670.tif	S356-20		NBM
569	sentry.20151025.012045629806.17680.tif	0.0833333	0	0	0.0833333	0	0	0	0	0	0	0	0	0	0	0	0	0	0	0	0	0	2	0.166667	0.166667		count	N	100	0	0	12	12	234.942	234.942	AUV	HD	NWHI	ACADEMICIAN BERG	sentry.20151025.012045629806.17680.tif	S356-20		NBM
570	sentry.20151025.012412292987.17742.tif	0.25	0	0	0	0	0	0	0	0	0	0	0	0	0	0	0	0	0	0	0	0	1	0.25	0.0833333		count	N	70	10	20	12	12	236.368	236.368	AUV	HD	NWHI	ACADEMICIAN BERG	sentry.20151025.012412292987.17742.tif	S356-20		NBM
571	sentry.20151025.012425626154.17746.tif	0.0833333	0	0	0	0	0.0833333	0	0	0	0	0	0	0	0	0	0	0	0	0	0	0.0833333	3	0.25	0.25		count	N	80	10	10	12	12	236.263	236.263	AUV	HD	NWHI	ACADEMICIAN BERG	sentry.20151025.012425626154.17746.tif	S356-20		NBM
572	sentry.20151025.012825622155.17818.tif	0	0.0833333	0	0	0.0833333	0	0	0	0	0	0	0	0	0	0	0	0	0	0	0	0	2	0.166667	0.166667		count	N	90	10	0	12	12	234.682	234.682	AUV	HD	NWHI	ACADEMICIAN BERG	sentry.20151025.012825622155.17818.tif	S356-20		NBM
573	sentry.20151025.013038953174.17858.tif	0.0833333	0	0	0	0	0.25	0	0	0	0	0	0	0	0	0	0	0	0	0	0	0	2	0.333333	0.166667		count	M	80	20	0	12	12	236.079	236.079	AUV	HD	NWHI	ACADEMICIAN BERG	sentry.20151025.013038953174.17858.tif	S356-20		NBM
574	sentry.20151025.013118952524.17870.tif	0.333333	0	0	0	0.166667	0	0	0	0	0	0	0	0	0	0	0	0	0	0	0	0	2	0.5	0.166667		count	N	100	0	0	12	12	236.882	236.882	AUV	HD	NWHI	ACADEMICIAN BERG	sentry.20151025.013118952524.17870.tif	S356-20		NBM
575	sentry.20151025.013332283676.17910.tif	0.1	0	0	0	0	0.1	0	0	0	0	0	0	0	0	0	0	0	0	0	0	0	2	0.2	0.1		count	N	100	0	0	20	20	236.616	236.616	AUV	HD	NWHI	ACADEMICIAN BERG	sentry.20151025.013332283676.17910.tif	S356-20		NBM
576	sentry.20151025.015752259428.18348.tif	0	0.0833333	0	0	0	0	0	0	0	0	0	0	0	0	0	0	0.0833333	0	0	0	0	2	0.166667	0.166667		count	N	100	0	0	12	12	452.805	452.805	AUV	HD	NWHI	ACADEMICIAN BERG	sentry.20151025.015752259428.18348.tif	S356-21		NBM
577	sentry.20151025.020812249327.18534.tif	0	0	0	0	0.0833333	0	0	0	0	0	0	0	0	0	0	0	0	0	0	0	0	1	0.0833333	0.0833333		count	N	100	0	0	12	12	456.491	456.491	AUV	HD	NWHI	ACADEMICIAN BERG	sentry.20151025.020812249327.18534.tif	S356-21		NBM
578	sentry.20151025.051032079451.21816.tif	0	0	0	0.0833333	0	0.0833333	0.166667	0	0	0	0	0	0	0	0	0	0	0	0	0	0	3	0.333333	0.25		count	N	50	0	50	12	12	437.876	437.876	AUV	HD	NWHI	ACADEMICIAN BERG	sentry.20151025.051032079451.21816.tif	S356-26		NBM
579	sentry.20151025.051805405622.21952.tif	0	0.05	0	0	0	0	0	0	0	0	0	0	0	0	0	0	0	0	0	0	0	1	0.05	0.05		count	N	70	0	30	20	20	447.886	447.886	AUV	HD	NWHI	ACADEMICIAN BERG	sentry.20151025.051805405622.21952.tif	S356-26		NBM
580	sentry.20151025.052732063192.22122.tif	0	0.0833333	0	0	0	0.0833333	0	0	0	0	0	0	0	0	0	0	0	0	0	0	0	2	0.166667	0.166667		count	N	75	15	10	12	12	441.127	441.127	AUV	HD	NWHI	ACADEMICIAN BERG	sentry.20151025.052732063192.22122.tif	S356-26		NBM
581	sentry.20151025.052938727737.22160.tif	0.0833333	0	0	0	0.0833333	0	0	0	0	0	0	0	0	0	0	0	0	0	0	0	0	2	0.166667	0.166667		count	N	70	0	30	12	12	444.766	444.766	AUV	HD	NWHI	ACADEMICIAN BERG	sentry.20151025.052938727737.22160.tif	S356-26		NBM
582	sentry.20151025.062902003077.23229.tif	0.0833333	0	0	0	0.416667	0	0	0	0	0	0	0	0	0	0	0	0	0	0.0833333	0	0	3	0.583333	0.25		count	N	100	0	0	12	12	238.207	238.207	AUV	HD	NWHI	ACADEMICIAN BERG	sentry.20151025.062902003077.23229.tif	S356-28		NBM
583	sentry.20151025.062948669078.23243.tif	0.166667	0	0	0	0.416667	0	0	0	0	0	0	0	0	0	0	0	0	0	0.0833333	0	0	3	0.666667	0.25		count	N	95	5	0	12	12	238.451	238.451	AUV	HD	NWHI	ACADEMICIAN BERG	sentry.20151025.062948669078.23243.tif	S356-28		NBM
584	sentry.20151025.063528663434.23345.tif	0	0.916667	0	0	0	0.0833333	0	0	0	0	0	0	0	0	0	0	0	0	0	0	0	2	1	0.166667		count	Y	90	10	0	12	12	237.252	237.252	AUV	HD	NWHI	ACADEMICIAN BERG	sentry.20151025.063528663434.23345.tif	S356-28		NBM
585	sentry.20151025.063901993118.23409.tif	0	0.0833333	0	0	0.25	0.333333	0	0	0	0	0	0	0	0	0	0	0	0	0	0	0	3	0.666667	0.25		count	Y	90	10	0	12	12	237.368	237.368	AUV	HD	NWHI	ACADEMICIAN BERG	sentry.20151025.063901993118.23409.tif	S356-28		NBM
586	sentry.20151025.070535299644.23887.tif	0	0	0	0	0.0833333	0	0	0	0	0	0	0	0	0	0	0	0	0	0	0	0	1	0.0833333	0.0833333		count	N	100	0	0	12	12	231.497	231.497	AUV	HD	NWHI	ACADEMICIAN BERG	sentry.20151025.070535299644.23887.tif	S356-29		NBM
587	sentry.20151025.070741964143.23925.tif	0.0833333	0	0	0	0	0	0	0	0	0	0	0	0	0	0	0	0	0	0	0	0	1	0.0833333	0.0833333		count	N	100	0	0	12	12	234.513	234.513	AUV	HD	NWHI	ACADEMICIAN BERG	sentry.20151025.070741964143.23925.tif	S356-29		NBM
588	sentry.20151025.070821963474.23937.tif	0.25	0	0	0	0	0.0833333	0	0	0	0	0	0	0	0	0	0	0	0	0	0	0	2	0.333333	0.166667		count	N	100	0	0	12	12	235.102	235.102	AUV	HD	NWHI	ACADEMICIAN BERG	sentry.20151025.070821963474.23937.tif	S356-29		NBM
589	sentry.20151025.071055294260.23983.tif	0.0833333	0	0	0	0	0	0.0833333	0	0	0	0	0	0	0	0	0	0	0	0	0	0	2	0.166667	0.166667		count	N	100	0	0	12	12	235.781	235.781	AUV	HD	NWHI	ACADEMICIAN BERG	sentry.20151025.071055294260.23983.tif	S356-29		NBM
590	sentry.20151025.071735287451.24103.tif	0.0833333	0	0	0	0.25	0	0	0	0	0	0	0	0	0	0	0	0	0	0	0	0	2	0.333333	0.166667		count	M	100	0	0	12	12	236.403	236.403	AUV	HD	NWHI	ACADEMICIAN BERG	sentry.20151025.071735287451.24103.tif	S356-29		NBM
591	sentry.20151025.072055284084.24163.tif	0.0833333	0	0	0	0.25	0	0	0	0	0	0	0	0	0	0	0	0	0	0	0	0	2	0.333333	0.166667		count	N	100	0	0	12	12	236.376	236.376	AUV	HD	NWHI	ACADEMICIAN BERG	sentry.20151025.072055284084.24163.tif	S356-29		NBM
592	sentry.20151025.072148616593.24179.tif	0	0	0	0	0.0833333	0	0	0	0	0	0	0	0	0	0	0	0	0	0.0833333	0	0	2	0.166667	0.166667		count	N	95	5	0	12	12	237.8	237.8	AUV	HD	NWHI	ACADEMICIAN BERG	sentry.20151025.072148616593.24179.tif	S356-29		NBM
593	sentry.20151025.072155283078.24181.tif	0.0833333	0	0	0	0.166667	0	0.0833333	0	0	0	0	0	0	0	0	0	0	0	0	0	0	3	0.333333	0.25		count	N	98	5	0	12	12	236.684	236.684	AUV	HD	NWHI	ACADEMICIAN BERG	sentry.20151025.072155283078.24181.tif	S356-29		NBM
594	sentry.20151025.072341947867.24213.tif	0.0833333	0	0	0	0.25	0	0	0	0	0	0	0	0	0	0	0	0	0	0	0	0	2	0.333333	0.166667		count	M	100	0	0	12	12	236.478	236.478	AUV	HD	NWHI	ACADEMICIAN BERG	sentry.20151025.072341947867.24213.tif	S356-29		NBM
595	sentry.20151025.072355281029.24217.tif	0.333333	0	0	0	0.25	0	0	0	0	0	0	0	0	0	0	0	0	0	0	0	0	2	0.583333	0.166667		count	M	100	0	0	12	12	236.519	236.519	AUV	HD	NWHI	ACADEMICIAN BERG	sentry.20151025.072355281029.24217.tif	S356-29		NBM
596	sentry.20151025.072521946184.24243.tif	0	0	0	0	0.333333	0	0	0	0	0	0	0	0	0	0	0	0	0	0	0	0	1	0.333333	0.0833333		count	Y	100	0	0	12	12	236.414	236.414	AUV	HD	NWHI	ACADEMICIAN BERG	sentry.20151025.072521946184.24243.tif	S356-29		NBM
597	sentry.20151025.072535279341.24247.tif	0	0	0	0	0.166667	0	0	0	0	0	0	0	0	0	0	0	0	0	0	0	0	1	0.166667	0.0833333		count	N	100	0	0	12	12	236.488	236.488	AUV	HD	NWHI	ACADEMICIAN BERG	sentry.20151025.072535279341.24247.tif	S356-29		NBM
598	sentry.20151025.072741943818.24285.tif	0.333333	0.0833333	0	0	0	0	0	0	0	0	0	0	0	0	0	0.0833333	0	0	0	0	0	3	0.5	0.25		count	N	100	0	0	12	12	236.418	236.418	AUV	HD	NWHI	ACADEMICIAN BERG	sentry.20151025.072741943818.24285.tif	S356-29		NBM
599	sentry.20151025.072801943482.24291.tif	0.5	0	0	0	0	0	0	0	0	0	0	0	0	0	0	0	0	0	0	0	0	1	0.5	0.0833333		count	Y	100	0	0	12	12	235.902	235.902	AUV	HD	NWHI	ACADEMICIAN BERG	sentry.20151025.072801943482.24291.tif	S356-29		NBM
600	sentry.20151006.161657965197.17570.tif	0	0.166667	0	0.166667	0	0	0	0	0	0	0	0	0	0	0	0	0	0	0	0	0	2	0.333333	0.166667		count	N	100	0	0	12	12	435.733	435.733	AUV	HD	ESC	KOKO	sentry.20151006.161657965197.17570.tif	S344-15		NBM
601	sentry.20151006.161804630767.17590.tif	0	0.0833333	0	0.916667	0	0	0	0	0	0	0	0	0	0	0	0	0	0	0	0	0	2	1	0.166667		count	M	100	0	0	12	12	437.261	437.261	AUV	HD	ESC	KOKO	sentry.20151006.161804630767.17590.tif	S344-15		NBM
602	sentry.20151006.161904629834.17608.tif	0	0.0833333	0	1.08333	0	0	0	0	0	0	0.0833333	0	0	0	0	0	0	0	0	0	0	3	1.25	0.25		count	M	95	5	0	12	12	438.113	438.113	AUV	HD	ESC	KOKO	sentry.20151006.161904629834.17608.tif	S344-15		NBM
603	sentry.20151006.162137960793.17654.tif	0	0	0	0.833333	0	0	0	0	0	0	0	0	0	0	0	0	0	0	0	0	0	1	0.833333	0.0833333		count	M	100	0	0	12	12	434.176	434.176	AUV	HD	ESC	KOKO	sentry.20151006.162137960793.17654.tif	S344-15		NBM
604	sentry.20151006.163011286041.17808.tif	0	0	0	0.333333	0	0	0	0	0	0	0	0	0	0	0	0	0	0	0	0	0	1	0.333333	0.0833333		count	N	100	0	0	12	12	435.748	435.748	AUV	HD	ESC	KOKO	sentry.20151006.163011286041.17808.tif	S344-15		NBM
605	sentry.20151006.163357949128.17876.tif	0	0	0	0.0833333	0	0	0	0	0	0	0	0	0	0	0	0	0	0	0	0	0	1	0.0833333	0.0833333		count	N	100	0	0	12	12	434.265	434.265	AUV	HD	ESC	KOKO	sentry.20151006.163357949128.17876.tif	S344-15		NBM
606	sentry.20151006.163717945932.17936.tif	0	0	0	0.333333	0	0	0	0	0	0	0	0	0	0	0	0	0	0	0	0	0	1	0.333333	0.0833333		count	N	100	0	0	12	12	437.846	437.846	AUV	HD	ESC	KOKO	sentry.20151006.163717945932.17936.tif	S344-15		NBM
607	sentry.20151006.164204607982.18022.tif	0	0	0	0.333333	0	0	0	0	0	0	0	0	0	0	0	0	0	0	0	0	0	1	0.333333	0.0833333		count	N	95	5	0	12	12	440.399	440.399	AUV	HD	ESC	KOKO	sentry.20151006.164204607982.18022.tif	S344-15		NBM
608	sentry.20151006.170117923125.18368.tif	0	0.0833333	0	0.0833333	0.166667	0	0	0	0	0	0	0	0	0	0	0	0	0	0	0	0	3	0.333333	0.25		count	N	90	5	5	12	12	473.546	473.546	AUV	HD	ESC	KOKO	sentry.20151006.170117923125.18368.tif	S344-32		NBM
609	sentry.20151006.170217922144.18386.tif	0	0	0	1.08333	0	0	0	0	0	0	0	0	0	0	0	0.0833333	0	0	0	0	0	2	1.16667	0.166667		count	M	0	95	5	12	12	476.053	476.053	AUV	HD	ESC	KOKO	sentry.20151006.170217922144.18386.tif	S344-32		NBM
610	sentry.20151006.170657917729.18470.tif	0	0	0	0.166667	0	0	0	0	0	0	0	0	0	0	0	0	0	0	1.16667	0	0	2	1.33333	0.166667		count	M	50	45	5	12	12	474.607	474.607	AUV	HD	ESC	KOKO	sentry.20151006.170657917729.18470.tif	S344-32		NBM
611	sentry.20151006.170917915506.18512.tif	0	0.583333	0	0.25	0	0	0	0	0	0	0	0	0.166667	0	0	0	0	0	0	0	0	3	1	0.25		count	Y	95	0	5	12	12	470.558	470.558	AUV	HD	ESC	KOKO	sentry.20151006.170917915506.18512.tif	S344-32		NBM
612	sentry.20151006.171944572239.18700.tif	0.0833333	0.0833333	0	0.416667	0	0	0	0	0	0	0	0	0	0	0	0	0	0	0	0	0.0833333	4	0.666667	0.333333		count	M	5	90	5	12	12	461.766	461.766	AUV	HD	ESC	KOKO	sentry.20151006.171944572239.18700.tif	S344-32		NBM
613	sentry.20151006.172017905102.18710.tif	0	0.333333	0	0.416667	0.0833333	0	0	0	0	0	0	0	0	0	0	0	0	0	0	0	0	3	0.833333	0.25		count	M	90	0	10	12	12	460.709	460.709	AUV	HD	ESC	KOKO	sentry.20151006.172017905102.18710.tif	S344-32		NBM
614	sentry.20151006.172057904463.18722.tif	0	0.25	0	0.166667	0	0	0	0	0	0	0	0	0	0	0	0	0	0	0.166667	0	0	3	0.583333	0.25		count	N	90	0	10	12	12	460.261	460.261	AUV	HD	ESC	KOKO	sentry.20151006.172057904463.18722.tif	S344-32		NBM
615	sentry.20151006.172257902566.18758.tif	0	0.0833333	0	0.333333	0	0	0	0	0	0	0	0	0	0	0	0	0	0	0	0	0.0833333	3	0.5	0.25		count	M	15	80	5	12	12	461.038	461.038	AUV	HD	ESC	KOKO	sentry.20151006.172257902566.18758.tif	S344-32		NBM
616	sentry.20151006.172751231363.18846.tif	0.0833333	0.583333	0	0.25	0	0	0	0	0	0	0	0	0	0	0	0	0	0	0	0	0	3	0.916667	0.25		count	Y	85	0	15	12	12	461.772	461.772	AUV	HD	ESC	KOKO	sentry.20151006.172751231363.18846.tif	S344-32		NBM
617	sentry.20151006.184837820921.20300.tif	0.0833333	0	0	0.416667	0	0	0	0	0	0	0	0	0	0	0	0.166667	0	0	0	0	0	3	0.666667	0.25		count	M	100	0	0	12	12	431.302	431.302	AUV	HD	ESC	KOKO	sentry.20151006.184837820921.20300.tif	S344-29		NBM
618	sentry.20151006.231737535879.25142.tif	0	0.0833333	0	0.666667	0	0	0	0	0	0	0	0	0	0	0	0	0	0	0	0	0	2	0.75	0.166667		count	M	100	0	0	12	12	339.346	339.346	AUV	HD	ESC	KOKO	sentry.20151006.231737535879.25142.tif	S344-19		NBM
619	sentry.20151006.232137531686.25214.tif	0.166667	0.333333	0	1.16667	0	0	0	0	0	0	0	0	0	0	0	0	0	0	0	0	0	3	1.66667	0.25		count	M	100	0	0	12	12	340.382	340.382	AUV	HD	ESC	KOKO	sentry.20151006.232137531686.25214.tif	S344-19		NBM
620	sentry.20151006.232437528531.25268.tif	0.166667	0.166667	0	1.41667	0	0	0	0	0	0	0	0	0	0	0	0	0	0	0	0	0.0833333	4	1.83333	0.333333		count	M	95	0	5	12	12	339.34	339.34	AUV	HD	ESC	KOKO	sentry.20151006.232437528531.25268.tif	S344-19		NBM
621	sentry.20151006.232737525368.25322.tif	0.166667	0.25	0	1	0	0.166667	0	0	0	0	0	0	0	0	0	0	0	0	0	0	0	4	1.58333	0.333333		count	Y	100	0	0	12	12	338.04	338.04	AUV	HD	ESC	KOKO	sentry.20151006.232737525368.25322.tif	S344-19		NBM
622	sentry.20151006.233117521488.25388.tif	0.166667	0.166667	0	0.833333	0	0	0	0	0	0	0	0	0	0	0	0	0	0	0	0	0	3	1.16667	0.25		count	Y	95	5	0	12	12	337.854	337.854	AUV	HD	ESC	KOKO	sentry.20151006.233117521488.25388.tif	S344-19		NBM
623	sentry.20151006.233237520077.25412.tif	0.166667	0.25	0	1.33333	0	0.166667	0	0	0	0	0	0	0	0	0	0	0	0	0	0	0	4	1.91667	0.333333		count	Y	100	0	0	12	12	337.179	337.179	AUV	HD	ESC	KOKO	sentry.20151006.233237520077.25412.tif	S344-19		NBM
624	sentry.20151006.233524183922.25462.tif	0.0833333	0.333333	0	0.583333	0	0.166667	0	0	0	0	0	0	0	0	0	0	0	0	0	0	0	4	1.16667	0.333333		count	M	100	0	0	12	12	337.241	337.241	AUV	HD	ESC	KOKO	sentry.20151006.233524183922.25462.tif	S344-19		NBM
625	sentry.20151006.233544183556.25468.tif	0	0.166667	0	1.75	0	0.166667	0	0	0	0	0	0	0	0	0	0	0	0	0	0	0	3	2.08333	0.25		count	Y	100	0	0	12	12	337.293	337.293	AUV	HD	ESC	KOKO	sentry.20151006.233544183556.25468.tif	S344-19		NBM
626	sentry.20151006.233857513380.25526.tif	0	0.0833333	0	0.75	0	0.25	0	0	0	0	0	0	0	0	0	0.0833333	0	0	0	0	0	4	1.16667	0.333333		count	Y	100	0	0	12	12	337.198	337.198	AUV	HD	ESC	KOKO	sentry.20151006.233857513380.25526.tif	S344-19		NBM
627	sentry.20151006.234110844426.25566.tif	0.25	0	0	0.75	0	0.0833333	0	0	0	0	0	0	0	0	0	0	0	0	0	0	0	3	1.08333	0.25		count	M	100	0	0	12	12	336.861	336.861	AUV	HD	ESC	KOKO	sentry.20151006.234110844426.25566.tif	S344-19		NBM
628	sentry.20151006.234750837340.25686.tif	0.0833333	0	0	1.41667	0	0.166667	0	0	0	0	0	0	0	0	0	0	0	0	0	0	0	3	1.66667	0.25		count	Y	100	0	0	12	12	337.268	337.268	AUV	HD	ESC	KOKO	sentry.20151006.234750837340.25686.tif	S344-19		NBM
629	sentry.20151007.003250789650.26496.tif	0	0	0	0.5	0	0	0	0	0	0	0	0	0	0	0	0	0	0	0	0	0	1	0.5	0.0833333		count	N	100	0	0	12	12	339.496	339.496	AUV	HD	ESC	KOKO	sentry.20151007.003250789650.26496.tif	S344-21		NBM
630	sentry.20151007.003324122446.26506.tif	0.0833333	0	0	0.416667	0	0	0	0	0	0	0	0	0	0	0	0	0	0	0	0	0	2	0.5	0.166667		count	N	100	0	0	12	12	338.585	338.585	AUV	HD	ESC	KOKO	sentry.20151007.003324122446.26506.tif	S344-21		NBM
631	sentry.20151007.003624119257.26560.tif	0	0.0833333	0	0.416667	0	0	0	0	0	0	0	0	0	0	0	0	0	0	0	0	0	2	0.5	0.166667		count	N	100	0	0	12	12	337.373	337.373	AUV	HD	ESC	KOKO	sentry.20151007.003624119257.26560.tif	S344-21		NBM
632	sentry.20151007.004157446586.26660.tif	0	0.0833333	0	0.5	0	0	0	0	0	0	0	0	0	0	0	0	0	0	0	0	0	2	0.583333	0.166667		count	M	100	0	0	12	12	341.774	341.774	AUV	HD	ESC	KOKO	sentry.20151007.004157446586.26660.tif	S344-21		NBM
633	sentry.20151007.004257445529.26678.tif	0	0.166667	0	1.41667	0	0	0	0	0	0	0	0	0	0	0	0.0833333	0	0	0	0	0	3	1.66667	0.25		count	Y	100	0	0	12	12	342.603	342.603	AUV	HD	ESC	KOKO	sentry.20151007.004257445529.26678.tif	S344-21		NBM
634	sentry.20151007.005217435637.26846.tif	0.166667	0	0	0.666667	0	0.0833333	0	0	0	0	0	0	0	0	0	0	0	0	0	0	0	3	0.916667	0.25		count	M	100	0	0	12	12	338.873	338.873	AUV	HD	ESC	KOKO	sentry.20151007.005217435637.26846.tif	S344-21		NBM
635	sentry.20151007.005504099459.26896.tif	0	0.0833333	0	0.916667	0	0	0	0	0	0	0	0	0	0	0	0	0	0	0	0	0	2	1	0.166667		count	M	100	0	0	12	12	339.142	339.142	AUV	HD	ESC	KOKO	sentry.20151007.005504099459.26896.tif	S344-21		NBM
636	sentry.20151007.013410724563.27600.tif	0	0	0	1.16667	0	0.0833333	0	0	0	0	0	0	0	0	0	0	0	0	0	0	0	2	1.25	0.166667		count	M	95	5	0	12	12	332.792	332.792	AUV	HD	ESC	KOKO	sentry.20151007.013410724563.27600.tif	S344-30		NBM
637	sentry.20151007.013904052771.27688.tif	0	0	0	0.416667	0	0	0	0	0	0	0	0	0	0	0	0	0	0	0	0	0	1	0.416667	0.0833333		count	M	95	5	0	12	12	331.638	331.638	AUV	HD	ESC	KOKO	sentry.20151007.013904052771.27688.tif	S344-30		NBM
638	sentry.20151007.015730699779.28020.tif	0	0.0833333	0	0.583333	0	0	0	0	0	0	0	0	0	0	0	0	0	0	0	0	0	2	0.666667	0.166667		count	M	100	0	0	12	12	333.431	333.431	AUV	HD	ESC	KOKO	sentry.20151007.015730699779.28020.tif	S344-30		NBM
639	sentry.20151007.020317360253.28124.tif	0	0	0	0.583333	0	0	0.0833333	0	0	0	0	0	0	0	0	0	0	0	0	0	0	2	0.666667	0.166667		count	M	70	15	15	12	12	329.413	329.413	AUV	HD	ESC	KOKO	sentry.20151007.020317360253.28124.tif	S344-30		NBM
640	sentry.20151007.020544024431.28168.tif	0.0833333	0.0833333	0	0.916667	0	0	0.25	0	0	0	0.0833333	0	0	0	0	0	0	0	0	0	0	5	1.41667	0.416667		count	M	100	0	0	12	12	325.713	325.713	AUV	HD	ESC	KOKO	sentry.20151007.020544024431.28168.tif	S344-30		NBM
641	sentry.20151008.094357995949.12365.tif	0.0833333	0	0	0	0	0	0	0	0	0	0	0	0	0	0	0.0833333	0	0	0	0	0	2	0.166667	0.166667		count	N	100	0	0	12	12	439.101	439.101	AUV	HD	ESC	KOKO	sentry.20151008.094357995949.12365.tif	S345-16		NBM
642	sentry.20151008.100511308007.12747.tif	0.0833333	0	0	0.0833333	0	0	0	0	0	0	0	0	0	0	0	0	0	0	0	0	0	2	0.166667	0.166667		count	N	80	0	20	12	12	440.622	440.622	AUV	HD	ESC	KOKO	sentry.20151008.100511308007.12747.tif	S345-16		NBM
643	sentry.20151008.161857612840.19475.tif	0.0833333	0	0	0	0	0	0	0	0	0	0	0	0	0	0	0	0	0	0	0	0	1	0.0833333	0.0833333		count	N	100	0	0	12	12	438.516	438.516	AUV	HD	ESC	KOKO	sentry.20151008.161857612840.19475.tif	S345-24		NBM
644	sentry.20151008.162004279501.19495.tif	0.5	0	0	0	0	0	0	0	0	0	0	0	0	0	0	0.0833333	0	0	0	0	0	2	0.583333	0.166667		count	N	100	0	0	12	12	438.149	438.149	AUV	HD	ESC	KOKO	sentry.20151008.162004279501.19495.tif	S345-24		NBM
645	sentry.20151008.163337599782.19739.tif	0.25	0	0	0	0	0	0	0	0	0	0	0	0	0	0	0	0	0	0	0	0	1	0.25	0.0833333		count	N	100	0	0	12	12	438.5	438.5	AUV	HD	ESC	KOKO	sentry.20151008.163337599782.19739.tif	S345-24		NBM
646	sentry.20151008.195030733442.23283.tif	0	0	0	0.583333	0	0.416667	0	0	0	0	0	0	0	0	0	0	0	0	0	0	0	2	1	0.166667		count	N	100	0	0	12	12	339.079	339.079	AUV	HD	ESC	KOKO	sentry.20151008.195030733442.23283.tif	S345-29		NBM
647	sentry.20151008.195637393929.23393.tif	0	0	0	0.416667	0	0.0833333	0	0	0	0	0	0	0	0	0	0	0	0	0	0	0	2	0.5	0.166667		count	N	100	0	0	12	12	338.808	338.808	AUV	HD	ESC	KOKO	sentry.20151008.195637393929.23393.tif	S345-29		NBM
648	sentry.20151008.201224044189.23677.tif	0	0	0	0.5	0	0.166667	0	0	0	0	0	0	0	0	0	0	0	0	0	0	0	2	0.666667	0.166667		count	Y	100	0	0	12	12	336.514	336.514	AUV	HD	ESC	KOKO	sentry.20151008.201224044189.23677.tif	S345-29		NBM
649	sentry.20151008.203250689535.24045.tif	0.0833333	0	0	0	0	0.166667	0	0	0	0	0	0	0	0	0	0	0	0	0	0	0	2	0.25	0.166667		count	N	100	0	0	12	12	338.908	338.908	AUV	HD	ESC	KOKO	sentry.20151008.203250689535.24045.tif	S345-30		NBM
650	sentry.20141127.091519555704.2177.tif	0.0833333	0.166667	0	0	0	0	0	0	0	0	0	0	0	0	0	0.0833333	0	0	0	0	0	3	0.333333	0.25		count	N	10	90		12	12	611.484	611.484	AUV	HD	ESC	YURYAKU	sentry.20141127.091519555704.2177.tif	S285-02		NBM
651	sentry.20141127.094536209045.2722.tif	0	0.0833333	0	0	0.0833333	0	0	0	0	0	0	0	0	0	0	0	0	0	0	0	0	2	0.166667	0.166667		count	N	100	0		12	12	587.564	587.564	AUV	HD	ESC	YURYAKU	sentry.20141127.094536209045.2722.tif	S285-03		NBM
652	sentry.20141127.095209539538.2840.tif	0.0833333	0	0	0	0	0	0	0	0	0	0	0	0	0	0	0.0833333	0	0	0	0	0	2	0.166667	0.166667		count	N	95	5		12	12	585.274	585.274	AUV	HD	ESC	YURYAKU	sentry.20141127.095209539538.2840.tif	S285-03		NBM
653	sentry.20141127.095216206137.2842.tif	0.166667	0	0	0	0	0	0	0	0	0	0	0	0	0	0	0	0	0	0	0	0	1	0.166667	0.0833333		count	N	95	5		12	12	585.284	585.284	AUV	HD	ESC	YURYAKU	sentry.20141127.095216206137.2842.tif	S285-03		NBM
654	sentry.20141127.095802870281.2946.tif	0.333333	0	0	0	0	0	0	0	0	0	0	0	0	0	0	0.0833333	0	0	0	0	0	2	0.416667	0.166667		count	Y	90	10		12	12	589.404	589.404	AUV	HD	ESC	YURYAKU	sentry.20141127.095802870281.2946.tif	S285-03		NBM
655	sentry.20141127.132146110403.6613.tif	0	0.333333	0	0	0.166667	0	0	0	0	0	0	0	0	0	0	0	0	0	0	0	0	2	0.5	0.166667		count	Y	95	0	5	12	12	474.069	474.069	AUV	HD	ESC	YURYAKU	sentry.20141127.132146110403.6613.tif	S285-22		NBM
656	sentry.20141127.132206110245.6619.tif	0	0.333333	0	0	0.0833333	0	0.0833333	0	0	0	0	0	0	0	0	0	0	0	0	0	0	3	0.5	0.25		count	Y	95	0	5	12	12	473.996	473.996	AUV	HD	ESC	YURYAKU	sentry.20141127.132206110245.6619.tif	S285-22		NBM
657	sentry.20141127.132339442883.6647.tif	0	0.166667	0	0	0.0833333	0	0	0	0	0	0	0	0	0	0	0	0.0833333	0	0	0	0	3	0.333333	0.25		count	N	100	0		12	12	473.51	473.51	AUV	HD	ESC	YURYAKU	sentry.20141127.132339442883.6647.tif	S285-22		NBM
658	sentry.20141127.132459441337.6671.tif	0.0833333	0.0833333	0	0	0.166667	0	0.166667	0	0	0	0	0	0	0	0	0	0	0	0	0	0	4	0.5	0.333333		count	N	100	0		12	12	472.815	472.815	AUV	HD	ESC	YURYAKU	sentry.20141127.132459441337.6671.tif	S285-22		NBM
659	sentry.20141127.132546107999.6685.tif	0.0833333	0.416667	0	0	0	0	0	0	0	0	0	0	0	0	0	0	0	0	0	0	0	2	0.5	0.166667		count	Y	100	0		12	12	471.922	471.922	AUV	HD	ESC	YURYAKU	sentry.20141127.132546107999.6685.tif	S285-22		NBM
660	sentry.20141127.132632774662.6699.tif	0	0.833333	0	0	0.0833333	0	0.333333	0	0	0	0	0	0	0	0	0	0	0	0	0	0	3	1.25	0.25		count	Y	95	0	5	12	12	471.917	471.917	AUV	HD	ESC	YURYAKU	sentry.20141127.132632774662.6699.tif	S285-22		NBM
661	sentry.20141127.132639441328.6701.tif	0	0.416667	0	0	0	0	0	0	0	0	0	0	0	0	0	0	0	0	0	0	0.0833333	2	0.5	0.166667		count	Y	95	0	5	12	12	471.875	471.875	AUV	HD	ESC	YURYAKU	sentry.20141127.132639441328.6701.tif	S285-22		NBM
662	sentry.20141127.132819440738.6731.tif	0	0.416667	0	0	0	0	0	0	0	0	0	0	0	0	0	0.0833333	0	0	0	0	0	2	0.5	0.166667		count	Y	95	0	5	12	12	469.758	469.758	AUV	HD	ESC	YURYAKU	sentry.20141127.132819440738.6731.tif	S285-22		NBM
663	sentry.20141127.132839440594.6737.tif	0	0.583333	0	0	0	0	0.416667	0	0	0	0	0	0	0	0	0	0	0	0	0	0	2	1	0.166667		count	Y	100	0		12	12	469.339	469.339	AUV	HD	ESC	YURYAKU	sentry.20141127.132839440594.6737.tif	S285-22		NBM
664	sentry.20141127.133252771961.6813.tif	0	0.0833333	0	0	0	0	0	0	0	0	0	0	0	0	0	0	0	0	0	0	0	1	0.0833333	0.0833333		count	N	95	0	5	12	12	469.351	469.351	AUV	HD	ESC	YURYAKU	sentry.20141127.133252771961.6813.tif	S285-22		NBM
665	sentry.20141127.133526104072.6859.tif	0.0833333	0.333333	0	0	0	0	0	0	0	0	0	0	0	0	0	0	0	0	0	0	0	2	0.416667	0.166667		count	Y	95	0	5	12	12	470.428	470.428	AUV	HD	ESC	YURYAKU	sentry.20141127.133526104072.6859.tif	S285-22		NBM
666	sentry.20141127.133646103446.6883.tif	0	0.166667	0	0	0	0	0	0	0	0	0	0	0	0	0	0	0	0	0	0	0	1	0.166667	0.0833333		count	N	100	0		12	12	470.709	470.709	AUV	HD	ESC	YURYAKU	sentry.20141127.133646103446.6883.tif	S285-22		NBM
667	sentry.20141127.170246008402.10591.tif	0.166667	0	0	0	0.166667	0	0.0833333	0	0	0	0	0	0	0	0	0	0	0	0	0	0	3	0.416667	0.25		count	N	95	0	5	12	12	474.956	474.956	AUV	HD	ESC	YURYAKU	sentry.20141127.170246008402.10591.tif	S285-11		NBM
668	sentry.20141127.171412669853.10797.tif	0	0.333333	0	0	0	0	0	0	0	0	0	0	0.0833333	0	0	0	0	0	0	0	0	2	0.416667	0.166667		count	M	75	0	25	12	12	467.365	467.365	AUV	HD	ESC	YURYAKU	sentry.20141127.171412669853.10797.tif	S285-11		NBM
669	sentry.20141127.171739334888.10859.tif	0	0.166667	0	0	0	0	0.0833333	0	0	0	0	0	0	0	0	0	0	0	0	0	0	2	0.25	0.166667		count	N	85	0	15	12	12	467.396	467.396	AUV	HD	ESC	YURYAKU	sentry.20141127.171739334888.10859.tif	S285-11		NBM
670	sentry.20141127.171939333967.10895.tif	0	0.166667	0	0	0.0833333	0	0	0	0	0	0	0	0	0	0	0	0	0	0	0	0	2	0.25	0.166667		count	N	95	0	5	12	12	467.653	467.653	AUV	HD	ESC	YURYAKU	sentry.20141127.171939333967.10895.tif	S285-11		NBM
671	sentry.20141127.172749330196.11042.tif	0	0.166667	0	0	0	0	0	0	0	0	0	0	0	0	0	0	0	0	0	0	0	1	0.166667	0.0833333		count	N	85	0	15	12	12	466.276	466.276	AUV	HD	ESC	YURYAKU	sentry.20141127.172749330196.11042.tif	S285-12		NBM
672	sentry.20141127.173809325445.11228.tif	0	0	0	0	0	0	0	0	0	0	0	0	0	0	0	0	0.0833333	0	0	0	0	1	0.0833333	0.0833333		count	N	90	0	10	12	12	464.859	464.859	AUV	HD	ESC	YURYAKU	sentry.20141127.173809325445.11228.tif	S285-12		NBM
673	sentry.20141127.173909324984.11246.tif	0	0.0833333	0	0	0	0	0	0	0	0	0	0	0	0	0	0	0	0	0	0	0	1	0.0833333	0.0833333		count	N	90	0	10	12	12	464.472	464.472	AUV	HD	ESC	YURYAKU	sentry.20141127.173909324984.11246.tif	S285-12		NBM
674	sentry.20141127.173949324672.11258.tif	0	0	0	0	0.0833333	0.0833333	0.166667	0	0	0	0	0	0	0	0	0	0	0	0	0	0	3	0.333333	0.25		count	N	90	0	10	12	12	464.086	464.086	AUV	HD	ESC	YURYAKU	sentry.20141127.173949324672.11258.tif	S285-12		NBM
675	sentry.20141127.173955991264.11260.tif	0.166667	0	0	0	0.416667	0	0	0	0	0	0	0	0	0	0	0	0	0	0	0	0	2	0.583333	0.166667		count	N	90	0	10	12	12	464.047	464.047	AUV	HD	ESC	YURYAKU	sentry.20141127.173955991264.11260.tif	S285-12		NBM
676	sentry.20141127.174209323606.11300.tif	0.0833333	0	0	0	0.0833333	0	0.0833333	0	0	0	0	0	0	0	0	0	0.0833333	0	0	0	0	4	0.333333	0.333333		count	N	85	0	15	12	12	461.767	461.767	AUV	HD	ESC	YURYAKU	sentry.20141127.174209323606.11300.tif	S285-12		NBM
677	sentry.20141127.174255989889.11314.tif	0	0.166667	0	0	0.0833333	0	0	0	0	0	0	0	0	0	0	0	0	0	0	0	0	2	0.25	0.166667		count	N	75	0	25	12	12	461.387	461.387	AUV	HD	ESC	YURYAKU	sentry.20141127.174255989889.11314.tif	S285-12		NBM
678	sentry.20141127.174415989277.11338.tif	0	0	0	0	0.166667	0	0	0	0	0	0	0	0	0	0	0	0	0	0	0	0	1	0.166667	0.0833333		count	M	80	0	20	12	12	460.419	460.419	AUV	HD	ESC	YURYAKU	sentry.20141127.174415989277.11338.tif	S285-12		NBM
679	sentry.20141127.174815987439.11410.tif	0	0.0833333	0	0	0.166667	0.0833333	0	0	0	0	0	0	0	0	0	0	0	0	0	0	0	3	0.333333	0.25		count	N	50	0	50	12	12	463.75	463.75	AUV	HD	ESC	YURYAKU	sentry.20141127.174815987439.11410.tif	S285-12		NBM
680	sentry.20141127.174935986818.11434.tif	0	0	0	0.0833333	0	0	0	0	0	0	0	0	0	0	0	0	0	0	0	0	0	1	0.0833333	0.0833333		count	N	95	0	5	12	12	463.834	463.834	AUV	HD	ESC	YURYAKU	sentry.20141127.174935986818.11434.tif	S285-12		NBM
681	sentry.20141127.175532650778.11541.tif	0	0.0833333	0	0	0	0	0	0	0	0	0	0	0	0	0	0	0	0	0	0	0	1	0.0833333	0.0833333		count	N	50	0	50	12	12	463.757	463.757	AUV	HD	ESC	YURYAKU	sentry.20141127.175532650778.11541.tif	S285-13		NBM
682	sentry.20141127.181119310151.11825.tif	0	0	0	0.0833333	0	0.0833333	0	0	0	0	0	0	0	0	0	0	0.0833333	0	0	0	0	3	0.25	0.25		count	N	100	0		12	12	467.703	467.703	AUV	HD	ESC	YURYAKU	sentry.20141127.181119310151.11825.tif	S285-13		NBM
683	sentry.20141127.181145976589.11833.tif	0	0	0	0.0833333	0.0833333	0	0	0	0	0	0	0	0	0	0	0	0	0	0	0	0	2	0.166667	0.166667		count	N	85	0	25	12	12	468.067	468.067	AUV	HD	ESC	YURYAKU	sentry.20141127.181145976589.11833.tif	S285-13		NBM
684	sentry.20141127.181205976437.11839.tif	0	0	0	0	0.166667	0	0	0	0	0	0	0	0	0	0	0	0	0	0	0	0	1	0.166667	0.0833333		count	N	80	0	20	12	12	468.349	468.349	AUV	HD	ESC	YURYAKU	sentry.20141127.181205976437.11839.tif	S285-13		NBM
685	sentry.20151009.234321323998.6488.tif	0	0.166667	0	0	0	0	0	0	0	0	0	0	0	0	0	0	0	0	0	0	0	1	0.166667	0.0833333		count	M	95	0	5	12	12	464.562	464.562	AUV	HD	ESC	YURYAKU	sentry.20151009.234321323998.6488.tif	S346-11		NBM
686	sentry.20151010.010817914194.8017.tif	0	0.125	0	0	0	0	0	0	0	0	0	0	0	0	0	0	0	0	0	0	0	1	0.125	0.0625		count	M	100	0		16	16	446.119	446.119	AUV	HD	ESC	YURYAKU	sentry.20151010.010817914194.8017.tif	S346-13		NBM
687	sentry.20151010.204312587354.11663.tif	0.166667	0	0	0	0	0	0	0	0	0	0	0	0	0	0	0	0	0	0	0	0	1	0.166667	0.0833333		count	Y	5	95		12	12	567.966	567.966	AUV	HD	ESC	YURYAKU	sentry.20151010.204312587354.11663.tif	S347-18		NBM
688	sentry.20151010.204439252726.11689.tif	0.416667	0.166667	0	0	0	0	0	0	0	0	0	0	0	0	0	0.25	0	0	0	0	0	3	0.833333	0.25		count	Y	0	100		12	12	567.761	567.761	AUV	HD	ESC	YURYAKU	sentry.20151010.204439252726.11689.tif	S347-18		NBM
689	sentry.20151010.225559141859.14052.tif	0	0	0	0	0.0833333	0	0	0	0	0	0	0	0	0	0	0	0	0	0	0	0	1	0.0833333	0.0833333		count	N	100	0		12	12	561.677	561.677	AUV	HD	ESC	YURYAKU	sentry.20151010.225559141859.14052.tif	S347-21d		NBM
690	sentry.20151010.230025804819.14132.tif	0	0	0	0	0.0833333	0	0	0	0	0	0	0	0	0	0	0	0	0	0	0	0	1	0.0833333	0.0833333		count	N	95	0	5	12	12	561.097	561.097	AUV	HD	ESC	YURYAKU	sentry.20151010.230025804819.14132.tif	S347-21d		NBM
691	sentry.20151010.230752465028.14266.tif	0	0.2	0	0	0	0	0	0	0	0	0	0	0	0	0	0.5	0	0	0	0	0	2	0.7	0.2		count	M	100	0		10	10	609.543	609.543	AUV	HD	ESC	YURYAKU	sentry.20151010.230752465028.14266.tif	S347-21d		NBM
692	sentry.20151010.231159128139.14340.tif	0.4	0	0	0	0.9	0	0	0	0	0	0	0	0	0	0	0.8	0.2	0	0	0	0	4	2.3	0.4		count	Y	100	0		10	10	601.634	601.634	AUV	HD	ESC	YURYAKU	sentry.20151010.231159128139.14340.tif	S347-21d		NBM
693	sentry.20151010.232039120839.14496.tif	0	0.5	0	0	0.416667	0.0833333	0	0	0	0	0	0	0	0	0	0	0	0	0	0	0	3	1	0.25		count	Y	100	0		12	12	621.428	621.428	AUV	HD	ESC	YURYAKU	sentry.20151010.232039120839.14496.tif	S347-21d		NBM
694	sentry.20151011.041838867990.19859.tif	0.0833333	0	0	0	0	0	0.25	0	0	0	0	0	0	0	0	0.0833333	0	0	0	0	0	3	0.416667	0.25		count	M	95	5		12	12	610.628	610.628	AUV	HD	ESC	YURYAKU	sentry.20151011.041838867990.19859.tif	S347-28		NBM
695	sentry.20151011.041918867435.19871.tif	0	0	0	0	0	0	0.125	0	0	0	0	0	0	0	0	0.0625	0	0	0	0	0	2	0.1875	0.125		count	N	95	0	5	16	16	609.889	609.889	AUV	HD	ESC	YURYAKU	sentry.20151011.041918867435.19871.tif	S347-28		NBM
696	sentry.20151011.044505512166.20335.tif	0	0.166667	0	0	0	0.0833333	0	0	0	0	0	0	0	0	0	0.166667	0	0	0	0	0.0833333	4	0.5	0.333333		count	M	90	0	10	12	12	615.615	615.615	AUV	HD	ESC	YURYAKU	sentry.20151011.044505512166.20335.tif	S347-28		NBM
697	sentry.20151011.044918841989.20411.tif	0.25	0.0833333	0	0	0	0	0	0	0	0	0	0	0	0	0	0.0833333	0	0	0	0	0.0833333	4	0.5	0.333333		count	Y	90	0	10	12	12	611.652	611.652	AUV	HD	ESC	YURYAKU	sentry.20151011.044918841989.20411.tif	S347-28		NBM
698	sentry.20151012.004245463352.13865.tif	0	0.05	0	0	0	0	0	0	0	0	0	0	0	0	0	0	0	0	0	0	0	1	0.05	0.05		count	N	95	0	5	20	20	458.224	458.224	AUV	HD	ESC	YURYAKU	sentry.20151012.004245463352.13865.tif	S348-17		NBM
699	sentry.20151012.010318778390.14235.tif	0	0	0	0.0833333	0.0833333	0	0	0	0	0	0	0	0	0	0	0	0	0	0	0	0	2	0.166667	0.166667		count	N	100	0		12	12	442.492	442.492	AUV	HD	ESC	YURYAKU	sentry.20151012.010318778390.14235.tif	S348-17		NBM
700	sentry.20151017.202701177522.4531.tif	0	0.166667	0	0	0	0	0.0833333	0	0	0	0	0	0	0	0	0	0	0	0	0	0	2	0.25	0.166667		count	N	75		25	12	12	573.95	573.95	AUV	HD	NWHI	NW Hancock	sentry.20151017.202701177522.4531.tif	S352-07		NBM
701	sentry.20151018.014005291006.9831.tif	0	2.66667	0	0	0	0	0.833333	0	0	0	0	0	0	0	0	0.0833333	0	0	0	0	0	3	3.58333	0.25		count	Y	95		5	12	12	306.724	306.724	AUV	HD	NWHI	NW Hancock	sentry.20151018.014005291006.9831.tif	S352-14		NBM
702	sentry.20151018.014638617756.9949.tif	0	0.25	0	0	0.25	0	0	0	0	0	0	0	0	0	0	0.5	0.416667	0	0	0	0	4	1.41667	0.333333		count	Y	10			12	12	348.142	348.142	AUV	HD	NWHI	NW Hancock	sentry.20151018.014638617756.9949.tif	S352-14		NBM
703	sentry.20151018.014951947644.10007.tif	0	0.333333	0	0.0833333	0	0	0.25	0	0	0	0	0	0	0	0	0.0833333	0	0	0	0	0	4	0.75	0.333333		count	Y	95		5	12	12	353.841	353.841	AUV	HD	NWHI	NW Hancock	sentry.20151018.014951947644.10007.tif	S352-14		NBM
704	sentry.20151018.015058613096.10027.tif	0	2.66667	0	0	0	0	0.25	0	0	0	0	0	0	0	0	0.25	0	0	0	0	0	3	3.16667	0.25		count	Y	100			12	12	342.276	342.276	AUV	HD	NWHI	NW Hancock	sentry.20151018.015058613096.10027.tif	S352-14		NBM
705	sentry.20151018.015418609609.10087.tif	0	0	0	0.333333	0.5	0	4.5	0	0	0	0	0	0	0	0	1.25	0	0	0	0	0	4	6.58333	0.333333		count	Y	95		5	12	12	334.866	334.866	AUV	HD	NWHI	NW Hancock	sentry.20151018.015418609609.10087.tif	S352-14		NBM
706	sentry.20151018.015505275405.10101.tif	0	0.5	0	0	0	0	0.166667	0	0	0	0	0	0	0	0	1	0	0	0	0	0	3	1.66667	0.25		count	Y	95		5	12	12	348.756	348.756	AUV	HD	NWHI	NW Hancock	sentry.20151018.015505275405.10101.tif	S352-14		NBM
707	sentry.20151018.015551941379.10115.tif	0	0.5	0	0	0	0	0.333333	0	0	0	0	0	0	0	0	0	0	0	0.0833333	0	0	3	0.916667	0.25		count	Y	95		5	12	12	358.1	358.1	AUV	HD	NWHI	NW Hancock	sentry.20151018.015551941379.10115.tif	S352-14		NBM
708	sentry.20151018.015625274010.10125.tif	0	0.333333	0	0	0	0	0.833333	0	0	0	0	0	0	0	0	0	0	0	0	0	0.166667	3	1.33333	0.5		count	N	100			6	6	369.328	369.328	AUV	HD	NWHI	NW Hancock	sentry.20151018.015625274010.10125.tif	S352-14		NBM
709	sentry.20151018.015925270892.10179.tif	0	0.416667	0	0	0.166667	0	0.0833333	0	0	0	0	0	0	0	0	0.0833333	0	0	0	0	0	4	0.75	0.333333		count	Y	100			12	12	346.033	346.033	AUV	HD	NWHI	NW Hancock	sentry.20151018.015925270892.10179.tif	S352-14		NBM
710	sentry.20151018.020005270202.10191.tif	0	0.833333	0	0	0	0	0	0	0	0	0	0	0	0	0	0	0	0	0	0	0	1	0.833333	0.0833333		count	Y	100			12	12	344.14	344.14	AUV	HD	NWHI	NW Hancock	sentry.20151018.020005270202.10191.tif	S352-14		NBM
711	sentry.20151018.020045269509.10203.tif	0	0.5	0	0	0.0833333	0	0	0	0	0	0	0	0	0	0	0.25	0	0	0.0833333	0	0	4	0.916667	0.333333		count	Y	100			12	12	341.601	341.601	AUV	HD	NWHI	NW Hancock	sentry.20151018.020045269509.10203.tif	S352-14		NBM
712	sentry.20151018.020411932752.10265.tif	0	0.5	0	0	0.25	0	0.166667	0	0	0	0	0	0	0	0	0	0	0	0	0	0	3	0.916667	0.25		count	Y	95		5	12	12	343.325	343.325	AUV	HD	NWHI	NW Hancock	sentry.20151018.020411932752.10265.tif	S352-14		NBM
713	sentry.20151018.021151924812.10403.tif	0	0.166667	0	0	0.166667	0	0.25	0	0	0	0	0	0	0	0	0	0	0	0	0	0	3	0.583333	0.25		count	N	95		5	12	12	346.896	346.896	AUV	HD	NWHI	NW Hancock	sentry.20151018.021151924812.10403.tif	S352-15		NBM
714	sentry.20151018.021518587865.10465.tif	0	0	0	0	0.166667	0	0.111111	0	0	0	0	0	0	0	0	0.277778	0	0	0	0	0	3	0.555556	0.166667		count	N	100			18	18	334.043	334.043	AUV	HD	NWHI	NW Hancock	sentry.20151018.021518587865.10465.tif	S352-15		NBM
715	sentry.20151018.021545254024.10473.tif	0	0.75	0	0.0833333	0.416667	0	0.333333	0	0	0	0	0	0	0	0	0.666667	0	0	0	0	0	5	2.25	0.416667		count	Y	100			12	12	336.049	336.049	AUV	HD	NWHI	NW Hancock	sentry.20151018.021545254024.10473.tif	S352-15		NBM
716	sentry.20151018.022105248519.10569.tif	0	0.666667	0	0.166667	0	0	0.25	0	0	0	0	0	0	0	0	0.75	0	0	0	0	0	4	1.83333	0.333333		count	Y	100			12	12	313.262	313.262	AUV	HD	NWHI	NW Hancock	sentry.20151018.022105248519.10569.tif	S352-15		NBM
717	sentry.20151018.022118581683.10573.tif	0	0.583333	0	0.0833333	0	0.0833333	0.416667	0	0	0	0	0	0	0	0	0.75	0	0	0	0	0	5	1.91667	0.416667		count	Y	100			12	12	312.996	312.996	AUV	HD	NWHI	NW Hancock	sentry.20151018.022118581683.10573.tif	S352-15		NBM
718	sentry.20151018.023051905228.10745.tif	0	0.25	0	0.0833333	0	0	0	0	0	0	0	0	0	0	0	0.833333	0	0	0	0	0	3	1.16667	0.25		count	N	100			12	12	361.718	361.718	AUV	HD	NWHI	NW Hancock	sentry.20151018.023051905228.10745.tif	S352-15		NBM
719	sentry.20151018.023111904886.10751.tif	0	0.166667	0	0	0	0	0.0833333	0	0	0	0	0	0	0	0	0.5	0	0	0	0	0	3	0.75	0.25		count	N	95		5	12	12	360.375	360.375	AUV	HD	NWHI	NW Hancock	sentry.20151018.023111904886.10751.tif	S352-15		NBM
720	sentry.20151018.023218570357.10771.tif	0	0.05	0	0	0	0	0	0	0	0	0	0	0	0	0	0.9	0	0	0	0	0	2	0.95	0.1		count	N	100			20	20	359.586	359.586	AUV	HD	NWHI	NW Hancock	sentry.20151018.023218570357.10771.tif	S352-15		NBM
721	sentry.20151018.023425234800.10809.tif	0	0.333333	0	0.25	0.0833333	0	0	0	0	0	0	0	0	0	0	0.333333	0	0	0	0	0	4	1	0.333333		count	M	95		5	12	12	361.536	361.536	AUV	HD	NWHI	NW Hancock	sentry.20151018.023425234800.10809.tif	S352-15		NBM
722	sentry.20151018.023638565922.10849.tif	0	1.25	0	0.333333	0.333333	0	0	0	0	0	0	0	0	0	0	0.166667	0	0	0	0	0	4	2.08333	0.333333		count	Y	100			12	12	349.181	349.181	AUV	HD	NWHI	NW Hancock	sentry.20151018.023638565922.10849.tif	S352-15		NBM
723	sentry.20151018.035959461003.12098.tif	0	0.222222	0	0	0	0	0.166667	0	0	0	0	0	0	0	0	0.222222	0	0	0	0	0	3	0.611111	0.166667		count	Y	95		5	18	18	362.117	362.117	AUV	HD	NWHI	NW Hancock	sentry.20151018.035959461003.12098.tif	S352-25d		NBM
724	sentry.20151018.040259458170.12152.tif	0	0.0833333	0	0.25	0.0833333	0	0	0	0	0	0	0	0	0	0	0	0	0	0	0	0	3	0.416667	0.25		count	N	85		15	12	12	360.071	360.071	AUV	HD	NWHI	NW Hancock	sentry.20151018.040259458170.12152.tif	S352-25d		NBM
725	sentry.20151018.040752786966.12240.tif	0	2.6	0	0.1	0.1	0	0	0	0	0	0	0	0	0	0	0	0	0	0	0	0	3	2.8	0.3		count	Y	100			10	10	331.754	331.754	AUV	HD	NWHI	NW Hancock	sentry.20151018.040752786966.12240.tif	S352-25d		NBM
726	sentry.20151018.041139449956.12308.tif	0	2.7	0	0.1	0.4	0	0.5	0	0	0	0	0	0	0	0	0.1	0	0	0	0	0	5	3.8	0.5		count	Y	100			10	10	321.43	321.43	AUV	HD	NWHI	NW Hancock	sentry.20151018.041139449956.12308.tif	S352-25d		NBM
727	sentry.20151018.041212782807.12318.tif	0	5.91667	0	0.0833333	0.166667	0	0.916667	0	0	0	0	0	0	0	0	0	0	0	0	0	0	4	7.08333	0.333333		count	Y	100			12	12	315.559	315.559	AUV	HD	NWHI	NW Hancock	sentry.20151018.041212782807.12318.tif	S352-25d		NBM
728	sentry.20151018.041319448383.12338.tif	0	8.58333	0	0.0833333	0.0833333	0	0.166667	0	0	0	0	0	0	0	0	0	0	0	0	0	0	4	8.91667	0.333333		count	Y	100			12	12	312.517	312.517	AUV	HD	NWHI	NW Hancock	sentry.20151018.041319448383.12338.tif	S352-25d		NBM
729	sentry.20151018.041326114890.12340.tif	0	5.66667	0	0.25	0.0833333	0.0833333	0.5	0	0	0	0	0	0	0	0	0	0	0	0	0	0	5	6.58333	0.416667		count	Y	95		5	12	12	312.241	312.241	AUV	HD	NWHI	NW Hancock	sentry.20151018.041326114890.12340.tif	S352-25d		NBM
730	sentry.20151018.041452780270.12366.tif	0	3.41667	0	0.166667	0	0	0.166667	0	0	0	0	0	0	0	0	0	0	0	0	0	0	3	3.75	0.25		count	Y	100			12	12	306.794	306.794	AUV	HD	NWHI	NW Hancock	sentry.20151018.041452780270.12366.tif	S352-25d		NBM
731	sentry.20151018.041626112012.12394.tif	0	12.75	0	0.0833333	0	0	0.25	0	0	0	0	0	0	0	0	0.666667	0	0	0	0	0	4	13.75	0.333333		count	Y	100			12	12	299.505	299.505	AUV	HD	NWHI	NW Hancock	sentry.20151018.041626112012.12394.tif	S352-25d		NBM
732	sentry.20151018.041912776065.12444.tif	0	14	0	0	0.166667	0	1	0	0	0	0	0	0	0	0	0.333333	0	0	0.0833333	0	0	5	15.5833	0.416667		count	Y	100			12	12	310.039	310.039	AUV	HD	NWHI	NW Hancock	sentry.20151018.041912776065.12444.tif	S352-25d		NBM
733	sentry.20151018.042239439351.12506.tif	0	2.16667	0	0.0833333	0.166667	0	0.75	0	0	0	0	0	0	0	0	0.833333	0	0	0	0	0	5	4	0.416667		count	Y	100			12	12	324.656	324.656	AUV	HD	NWHI	NW Hancock	sentry.20151018.042239439351.12506.tif	S352-25d		NBM
734	sentry.20151018.042346104898.12526.tif	0	1	0	0.25	0	0	3.91667	0	0	0	0	0	0	0	0	0.75	0	0	0	0	0	4	5.91667	0.333333		count	Y	100			12	12	321.485	321.485	AUV	HD	NWHI	NW Hancock	sentry.20151018.042346104898.12526.tif	S352-25d		NBM
735	sentry.20151018.042432770907.12540.tif	0	0.733333	0	0	0.0666667	0	7.66667	0	0	0	0	0	0	0	0	0.466667	0	0	0	0	0	4	8.93333	0.266667		count	Y	100			15	15	317.766	317.766	AUV	HD	NWHI	NW Hancock	sentry.20151018.042432770907.12540.tif	S352-25d		NBM
736	sentry.20151018.042612769269.12570.tif	0	0.6	0	0.15	0.05	0	0.25	0	0	0	0	0	0	0	0	0.25	0	0	0	0	0	5	1.3	0.25		count	Y	95		5	20	20	323.311	323.311	AUV	HD	NWHI	NW Hancock	sentry.20151018.042612769269.12570.tif	S352-25d		NBM
737	sentry.20151018.042726101305.12592.tif	0	0.9	0	0.15	0.05	0	1.55	0	0	0	0	0	0	0	0	0	0	0	0	0	0	4	2.65	0.2		count	Y	90		10	20	20	323.983	323.983	AUV	HD	NWHI	NW Hancock	sentry.20151018.042726101305.12592.tif	S352-25d		NBM
738	sentry.20151018.063032645744.14806.tif	0	1.05	0	0.1	0	0	0.3	0	0	0	0	0	0	0	0	0	0	0	0	0	0	3	1.45	0.15		count	Y	100			20	20	332.784	332.784	AUV	HD	NWHI	NW Hancock	sentry.20151018.063032645744.14806.tif	S352-19		NBM
739	sentry.20151018.063125978069.14820.tif	0	1.66667	0	0.0833333	0	0	1.5	0	0	0	0	0	0	0	0	0	0	0	0	0	0	3	3.25	0.25		count	Y	100			12	12	330.849	330.849	AUV	HD	NWHI	NW Hancock	sentry.20151018.063125978069.14820.tif	S352-19		NBM
740	sentry.20151018.063559307061.14902.tif	0	1.5	0	0	0	0	1.08333	0	0	0	0	0	0	0	0	0.166667	0	0	0	0	0	3	2.75	0.25		count	Y	100			12	12	329.376	329.376	AUV	HD	NWHI	NW Hancock	sentry.20151018.063559307061.14902.tif	S352-19		NBM
741	sentry.20151018.064052635445.14990.tif	0	1.16667	0	0.166667	0	0	0	0	0	0	0	0	0	0	0	1.25	0	0	0	0	0	3	2.58333	0.25		count	Y	100			12	12	317.855	317.855	AUV	HD	NWHI	NW Hancock	sentry.20151018.064052635445.14990.tif	S352-19		NBM
742	sentry.20151018.064419298586.15052.tif	0	0	0	0.15	0.2	0	0.3	0	0	0	0	0	0	0	0	1.5	0	0	0	0	0	4	2.15	0.2		count	Y	100			20	20	311.587	311.587	AUV	HD	NWHI	NW Hancock	sentry.20151018.064419298586.15052.tif	S352-19		NBM
743	sentry.20151018.064845960732.15132.tif	0	2.83333	0	0.333333	0	0	0.666667	0	0	0	0	0	0	0	0	1.41667	0	0	0	0	0	4	5.25	0.333333		count	Y	100			12	12	316.079	316.079	AUV	HD	NWHI	NW Hancock	sentry.20151018.064845960732.15132.tif	S352-19		NBM
744	sentry.20151018.064939293226.15148.tif	0	2.91667	0	0.0833333	0	0	0.333333	0	0	0	0	0	0	0	0	1.33333	0	0	0	0	0	4	4.66667	0.333333		count	Y	100			12	12	317.619	317.619	AUV	HD	NWHI	NW Hancock	sentry.20151018.064939293226.15148.tif	S352-19		NBM
745	sentry.20151018.065252623400.15206.tif	0	0.15	0	0	0	0	0.4	0	0	0	0	0	0	0	0	1.7	0	0	0	0	0	3	2.25	0.15		count	M	100			20	20	337.365	337.365	AUV	HD	NWHI	NW Hancock	sentry.20151018.065252623400.15206.tif	S352-19		NBM
746	sentry.20151018.093702466629.18161.tif	0	0	0	0	0	0	0.166667	0	0	0	0	0	0	0	0	0.0833333	0	0	0	0	0	2	0.25	0.166667		count	N	100			12	12	579.846	579.846	AUV	HD	NWHI	NW Hancock	sentry.20151018.093702466629.18161.tif	S352-22		NBM
747	sentry.20151018.093735799377.18171.tif	0	0	0	0	0	0	0.65	0	0	0	0	0	0	0	0	0	0	0	0	0	0	1	0.65	0.05		count	N	100			20	20	579.006	579.006	AUV	HD	NWHI	NW Hancock	sentry.20151018.093735799377.18171.tif	S352-22		NBM
748	sentry.20151018.093835798499.18189.tif	0	0	0	0	0	0	0.666667	0	0	0	0	0	0	0	0	0	0	0	0	0	0	1	0.666667	0.0833333		count	N	50		50	12	12	578.94	578.94	AUV	HD	NWHI	NW Hancock	sentry.20151018.093835798499.18189.tif	S352-22		NBM
749	sentry.20151018.140535565496.22995.tif	0	0.0833333	0	0	0	0	0.25	0	0	0	0	0	0	0	0	0.0833333	0.75	0	0	0	0	4	1.16667	0.333333		count	N	90		10	12	12	558.176	558.176	AUV	HD	NWHI	NW Hancock	sentry.20151018.140535565496.22995.tif	S352-26d		NBM
750	sentry.20151019.012626378731.3680.tif	0	0.933333	0	0	0	0	0.133333	0	0	0	0	0	0	0	0	0	0	0	0	0	0	2	1.06667	0.133333		count	Y	95		5	15	15	410.658	410.658	AUV	HD	NWHI	SE Hancock	sentry.20151019.012626378731.3680.tif	S353-05		NBM
751	sentry.20151019.013433038357.3826.tif	0	0.666667	0	0	0	0	0	0	0	0	0	0	0	0	0	0	0.25	0	0	0	0	2	0.916667	0.166667		count	Y	90		10	12	12	426.3	426.3	AUV	HD	NWHI	SE Hancock	sentry.20151019.013433038357.3826.tif	S353-05		NBM
752	sentry.20151019.013946366964.3920.tif	0.0833333	0.416667	0	0	0	0	0.0833333	0	0	0	0	0	0	0	0	0	0.25	0	0	0	0	4	0.833333	0.333333		count	Y	85		15	12	12	439.372	439.372	AUV	HD	NWHI	SE Hancock	sentry.20151019.013946366964.3920.tif	S353-05		NBM
753	sentry.20151019.025322965466.5244.tif	0	1.58333	0	0	0	0	0.166667	0	0	0	0	0	0	0	0	1.08333	0.0833333	0	0	0	0	4	2.91667	0.333333		count	Y	95		5	12	12	315.366	315.366	AUV	HD	NWHI	SE Hancock	sentry.20151019.025322965466.5244.tif	S353-07		NBM
754	sentry.20151019.030209623573.5402.tif	0	0.25	0	0	0.333333	0	0.0833333	0	0	0	0	0	0	0	0	0.0833333	0	0	0	0	0	4	0.75	0.333333		count	Y	90		10	12	12	331.899	331.899	AUV	HD	NWHI	SE Hancock	sentry.20151019.030209623573.5402.tif	S353-07		NBM
755	sentry.20151019.030929616458.5534.tif	0	0.933333	0	0	0	0	0.0666667	0	0	0	0	0	0	0	0	0.8	0	0	0	0	0	3	1.8	0.2		count	Y	80		20	15	15	342.202	342.202	AUV	HD	NWHI	SE Hancock	sentry.20151019.030929616458.5534.tif	S353-07		NBM
756	sentry.20151019.031749541582.5684.tif	0.133333	0.333333	0	0	0	0	0	0	0	0	0	0	0	0	0	0.466667	0	0	0	0	0	3	0.933333	0.2		count	M	80		20	15	15	332.543	332.543	AUV	HD	NWHI	SE Hancock	sentry.20151019.031749541582.5684.tif	S353-07		NBM
757	sentry.20151019.031842874911.5700.tif	0	0.833333	0	0	0.0833333	0	0.25	0	0	0	0	0	0	0	0	0	0.333333	0	0	0	0	4	1.5	0.333333		count	Y	80		20	12	12	331.74	331.74	AUV	HD	NWHI	SE Hancock	sentry.20151019.031842874911.5700.tif	S353-07		NBM
758	sentry.20151019.032002874904.5724.tif	0	1.22222	0	0	0	0	0.222222	0	0	0	0	0	0	0	0	1.88889	0	0	0	0	0	3	3.33333	0.333333		count	Y	50		50	9	9	334.96	334.96	AUV	HD	NWHI	SE Hancock	sentry.20151019.032002874904.5724.tif	S353-07		NBM
759	sentry.20151019.033559541487.6011.tif	0	4.41667	0	0	0	0	0	0	0	0	0	0	0	0	0	0	0	0	0	0	0	1	4.41667	0.0833333		count	Y	100			12	12	334.141	334.141	AUV	HD	NWHI	SE Hancock	sentry.20151019.033559541487.6011.tif	S353-08		NBM
760	sentry.20151019.034032874796.6093.tif	0	0.8	0	0	0	0	0	0	0	0	0	0	0	0	0	0.5	0	0	0	0	0	2	1.3	0.1		count	Y	85		15	20	20	339.404	339.404	AUV	HD	NWHI	SE Hancock	sentry.20151019.034032874796.6093.tif	S353-08		NBM
761	sentry.20151019.034806208089.6229.tif	0	2	0	0	0	0	0	0	0	0	0	0	0	0	0	0.0833333	0.0833333	0	0	0	0	3	2.16667	0.25		count	Y	100			12	12	342.881	342.881	AUV	HD	NWHI	SE Hancock	sentry.20151019.034806208089.6229.tif	S353-08		NBM
762	sentry.20151019.082409333742.11198.tif	0	0.166667	0	0	0	0	0	0	0	0	0	0	0	0	0	0	0	0	0	0	0	1	0.166667	0.0833333		count	Y	85		15	12	12	443.077	443.077	AUV	HD	NWHI	SE Hancock	sentry.20151019.082409333742.11198.tif	S353-14		NBM
763	sentry.20151019.083935986412.11476.tif	0	0	0	0	0	0	0.833333	0	0	0	0	0	0	0	0	0	0.25	0	0	0	0	2	1.08333	0.166667		count	N	95		5	12	12	439.35	439.35	AUV	HD	NWHI	SE Hancock	sentry.20151019.083935986412.11476.tif	S353-14		NBM
764	sentry.20151019.090205965646.11881.tif	0	0.583333	0	0.0833333	0.0833333	0	0.25	0	0	0	0	0	0	0	0	0.166667	0	0	0	0	0	5	1.16667	0.416667		count	Y	95		5	12	12	388.937	388.937	AUV	HD	NWHI	SE Hancock	sentry.20151019.090205965646.11881.tif	S353-15		NBM
765	sentry.20151019.090512629378.11937.tif	0	0.2	0	0	0	0	0.0666667	0	0	0	0	0	0	0	0	0	0	0	0	0	0	2	0.266667	0.133333		count	M	90		10	15	15	385.794	385.794	AUV	HD	NWHI	SE Hancock	sentry.20151019.090512629378.11937.tif	S353-15		NBM
766	sentry.20151019.092549276630.12307.tif	0	1	0	0	0	0	0.0833333	0	0	0	0	0	0	0	0	0	0	0	0	0	0	2	1.08333	0.166667		count	Y	75		25	12	12	389.355	389.355	AUV	HD	NWHI	SE Hancock	sentry.20151019.092549276630.12307.tif	S353-15		NBM
767	sentry.20151019.100935901426.13095.tif	0	0.25	0	0	0	0	0	0	0	0	0	0	0	0	0	1.08333	0	0	0	0	0	2	1.33333	0.166667		count	M	75		25	12	12	336.035	336.035	AUV	HD	NWHI	SE Hancock	sentry.20151019.100935901426.13095.tif	S353-16		NBM
768	sentry.20151019.102302554873.13337.tif	0	1	0	0	0	0	0.05	0	0	0	0	0	0	0	0	0	0	0	0	0	0	2	1.05	0.1		count	Y	85		15	20	20	324.075	324.075	AUV	HD	NWHI	SE Hancock	sentry.20151019.102302554873.13337.tif	S353-16		NBM
769	sentry.20151019.151835619891.18657.tif	0	0	0	0	0.0833333	0	0	0	0	0	0	0	0	0	0	0.166667	0	0	0	0	0	2	0.25	0.166667		count	N	85	5	10	12	12	570.27	570.27	AUV	HD	NWHI	SE Hancock	sentry.20151019.151835619891.18657.tif	S353-22		NBM
770	sentry.20151019.154535596815.19143.tif	0	0.3	0	0	0	0	0	0	0	0	0	0	0	0	0	0.1	0.05	0	0	0	0	3	0.45	0.15		count	Y	90	10		20	20	587.32	587.32	AUV	HD	NWHI	SE Hancock	sentry.20151019.154535596815.19143.tif	S353-22		NBM
771	sentry.20151019.233028532158.27507.tif	0	0.0833333	0	0	0	1	0	0	0	0	0	0	0	0	0	0.166667	0	0	0	0	0	3	1.25	0.25		count	M	80	10	10	12	12	590.786	590.786	AUV	HD	NWHI	SE Hancock	sentry.20151019.233028532158.27507.tif	S353-33		NBM
772	sentry.20151019.233235196981.27545.tif	0	0.166667	0	0	0.0833333	0.333333	0	0	0	0	0	0	0	0	0	0.166667	0	0	0	0	0	4	0.75	0.333333		count	M	90		10	12	12	592.956	592.956	AUV	HD	NWHI	SE Hancock	sentry.20151019.233235196981.27545.tif	S353-33		NBM
773	sentry.20151019.233755192410.27641.tif	0	0.0833333	0	0	0	0.416667	0	0	0	0	0	0	0	0	0	0	0.166667	0	0	0	0	3	0.666667	0.25		count	M	10	85	5	12	12	588.991	588.991	AUV	HD	NWHI	SE Hancock	sentry.20151019.233755192410.27641.tif	S353-33		NBM
774	sentry.20151020.021738385439.30515.tif	0	0.166667	0	0.0833333	0.0833333	0	0	0	0	0	0	0	0	0	0	0	0	0	0	0	0	3	0.333333	0.25		count	Y	100			12	12	442.396	442.396	AUV	HD	NWHI	SE Hancock	sentry.20151020.021738385439.30515.tif	S353-37		NBM
775	sentry.20151020.022618377554.30671.tif	0	0	0	0	0	0.0833333	2.08333	0	0	0	0	0	0	0	0	0	0.166667	0	0	0	0	3	2.33333	0.25		count	N	100			12	12	427.276	427.276	AUV	HD	NWHI	SE Hancock	sentry.20151020.022618377554.30671.tif	S353-37		NBM
776	sentry.20151020.023045040108.30751.tif	0	0	0	0	0	0.0833333	1.83333	0	0	0	0	0	0	0	0	0	0	0	0	0	0	2	1.91667	0.166667		count	N	85		15	12	12	433.611	433.611	AUV	HD	NWHI	SE Hancock	sentry.20151020.023045040108.30751.tif	S353-37		NBM
777	sentry.20151020.023431703411.30819.tif	0	0.2	0	0	0	0	0.2	0	0	0	0	0	0	0	0	0	0.1	0	0	0	0	3	0.5	0.15		count	M	90		10	20	20	434.049	434.049	AUV	HD	NWHI	SE Hancock	sentry.20151020.023431703411.30819.tif	S353-37		NBM
778	sentry.20151020.023525035835.30835.tif	0	0.0833333	0	0	0	0	0.0833333	0	0	0	0	0	0	0	0	2.66667	0	0	0	0	0	3	2.83333	0.25		count	N	95		5	12	12	435.69	435.69	AUV	HD	NWHI	SE Hancock	sentry.20151020.023525035835.30835.tif	S353-37		NBM
779	sentry.20151020.024231696055.30963.tif	0	0.0833333	0	0	0	0	0.166667	0	0	0	0	0	0	0	0	0	0.0833333	0	0	0	0	3	0.333333	0.25		count	N	55		45	12	12	436.673	436.673	AUV	HD	NWHI	SE Hancock	sentry.20151020.024231696055.30963.tif	S353-37		NBM
780	sentry.20151020.025931680266.31269.tif	0	0.375	0	0	0	0	0.875	0	0	0	0	0	0	0	0	0.125	0	0	0	0	0	3	1.375	0.375		count	M	75		25	8	8	444.825	444.825	AUV	HD	NWHI	SE Hancock	sentry.20151020.025931680266.31269.tif	S353-38		NBM
781	sentry.20151020.030125011777.31303.tif	0	0	0	0	0	0.1	0.3	0	0	0	0	0	0	0	0	0	0	0	0	0	0	2	0.4	0.2		count	N	85		15	10	10	444.518	444.518	AUV	HD	NWHI	SE Hancock	sentry.20151020.030125011777.31303.tif	S353-38		NBM
782	sentry.20151020.030651673482.31401.tif	0	0.166667	0	0	0	0	0.25	0	0	0	0	0	0	0	0	0	0	0	0	0	0	2	0.416667	0.166667		count	N	25		75	12	12	438.533	438.533	AUV	HD	NWHI	SE Hancock	sentry.20151020.030651673482.31401.tif	S353-38		NBM
783	sentry.20151020.030951670654.31455.tif	0	0.3	0	0	0	0	0.8	0	0	0	0	0	0	0	0	0	0	0	0	0	0	2	1.1	0.2		count	M	85		15	10	10	434.218	434.218	AUV	HD	NWHI	SE Hancock	sentry.20151020.030951670654.31455.tif	S353-38		NBM
784	sentry.20151020.031924994914.31627.tif	0	4.58333	0	0	0	0	3.16667	0	0	0	0	0	0	0	0	0.166667	0.333333	0	0	0	0	4	8.25	0.333333		count	Y	95		5	12	12	402.916	402.916	AUV	HD	NWHI	SE Hancock	sentry.20151020.031924994914.31627.tif	S353-38		NBM
785	sentry.20151020.032244991796.31687.tif	0	0.416667	0	0	0	0	1.91667	0	0	0	0	0	0	0	0	0	0	0	0	0	0	2	2.33333	0.166667		count	Y	100			12	12	407.369	407.369	AUV	HD	NWHI	SE Hancock	sentry.20151020.032244991796.31687.tif	S353-38		NBM
786	sentry.20151021.203522216180.1420.tif	0.0833333	0.416667	0	0	0	0	0	0	0	0	0	0	0	0	0	0.0833333	0	0	0	0	0	3	0.583333	0.25		count	M	90		10	12	12	330.784	330.784	AUV	HD	NWHI	SE Hancock	sentry.20151021.203522216180.1420.tif	S354-03		NBM
787	sentry.20151021.204448873237.1590.tif	0.0833333	0.25	0	0	0	0	0	0	0	0	0	0	0	0	0	0.5	0.0833333	0	0	0	0	4	0.916667	0.333333		count	Y	100			12	12	326.145	326.145	AUV	HD	NWHI	SE Hancock	sentry.20151021.204448873237.1590.tif	S354-03		NBM
788	sentry.20151021.210002190898.1864.tif	0.166667	0.666667	0	0	0	0	0	0	0	0	0	0	0	0	0	0	0	0	0	0	0	2	0.833333	0.166667		count	Y	90		10	12	12	328.24	328.24	AUV	HD	NWHI	SE Hancock	sentry.20151021.210002190898.1864.tif	S354-04		NBM
789	sentry.20151021.211715506813.2174.tif	0	0.333333	0	0	0	0	0.0833333	0	0	0	0	0	0	0	0	0.5	0	0	0	0	0	3	0.916667	0.25		count	Y	100			12	12	313.33	313.33	AUV	HD	NWHI	SE Hancock	sentry.20151021.211715506813.2174.tif	S354-04		NBM
790	sentry.20151022.013241926941.6772.tif	0.0833333	0.583333	0	0	0.0833333	1.08333	0.0833333	0	0	0	0	0	0	0	0	0	0	0	0	0	0	5	1.91667	0.416667		count	Y	20	70	10	12	12	594.222	594.222	AUV	HD	NWHI	SE Hancock	sentry.20151022.013241926941.6772.tif	S354-10		NBM
791	sentry.20151022.030118516697.8367.tif	0	5	0	0	0.0833333	0	0.333333	0	0	0	0	0	0	0	0	0.833333	0	0	0	0	0	4	6.25	0.333333		count	Y	100			12	12	309.958	309.958	AUV	HD	NWHI	SE Hancock	sentry.20151022.030118516697.8367.tif	S354-12		NBM
792	sentry.20151022.031238506429.8571.tif	0	0.5	0	0	0.0833333	0	0	0	0	0	0	0	0	0	0	0	0	0	0	0	0	2	0.583333	0.166667		count	M	90		10	12	12	349.818	349.818	AUV	HD	NWHI	SE Hancock	sentry.20151022.031238506429.8571.tif	S354-12		NBM
793	sentry.20151022.031445171149.8609.tif	0	1	0	0	0.0833333	0	0.166667	0	0	0	0	0	0	0	0	0	0	0	0	0	0	3	1.25	0.25		count	Y	85		15	12	12	338.577	338.577	AUV	HD	NWHI	SE Hancock	sentry.20151022.031445171149.8609.tif	S354-12		NBM
794	sentry.20151022.032331829737.8767.tif	0	2.83333	0	0.0833333	0	0	0.333333	0	0	0	0	0	0	0	0	2.75	0	0	0	0	0	4	6	0.333333		count	Y	100			12	12	326.141	326.141	AUV	HD	NWHI	SE Hancock	sentry.20151022.032331829737.8767.tif	S354-12		NBM
795	sentry.20151022.032525161214.8801.tif	0	3.58333	0	0	0	0	0.333333	0	0	0	0	0	0	0	0	1.66667	0	0	0	0	0	3	5.58333	0.25		count	Y	95		5	12	12	331.038	331.038	AUV	HD	NWHI	SE Hancock	sentry.20151022.032525161214.8801.tif	S354-12		NBM
796	sentry.20151022.033641817248.9004.tif	0	2.33333	0	0	0.0833333	0	0.0833333	0	0	0	0	0	0	0	0	1.33333	0	0	0	0	0	4	3.83333	0.333333		count	Y	100			12	12	325.446	325.446	AUV	HD	NWHI	SE Hancock	sentry.20151022.033641817248.9004.tif	S354-22s		NBM
797	sentry.20151022.033655150261.9008.tif	0	2.75	0	0	0.25	0	0.333333	0	0	0	0	0	0	0	0	1.25	0	0	0	0	0	4	4.58333	0.333333		count	Y	95		5	12	12	327.682	327.682	AUV	HD	NWHI	SE Hancock	sentry.20151022.033655150261.9008.tif	S354-22s		NBM
798	sentry.20151022.034808472807.9210.tif	0	0.833333	0	0	0	0	0	0	0	0	0	0	0	0	0	0.166667	0	0	0	0	0	2	1	0.166667		count	Y	100			12	12	341.445	341.445	AUV	HD	NWHI	SE Hancock	sentry.20151022.034808472807.9210.tif	S354-22s		NBM
799	sentry.20151022.035541798874.9346.tif	0	1.33333	0	0	0	0	0	0	0	0	0	0	0	0	0	0.416667	0	0	0	0	0	2	1.75	0.166667		count	Y	85		15	12	12	337.445	337.445	AUV	HD	NWHI	SE Hancock	sentry.20151022.035541798874.9346.tif	S354-22s		NBM
801	HS_C5_10	0.0657462	0	0	0.131492	0.131492	0.131492	0	0	0	0	0	0.0657462	0	0	0	0	0	0	0	0	0.0657462	6	0.591716	0.394477		Count	M	0	100	0	15.21	15.21	595.992	595.992	towed cam	SD	NE Atlantic	Hatton Bank	HS_C5	HS_C5_10	Bullimore et al., 2013	Kerry Howell
802	HS_C5_11	0.460224	0.262985	0	0.657462	0.0657462	0.0657462	0	0	0	0	0	0	0	0	0	0	0	0	0	0	0.0657462	6	1.57791	0.394477		Count	M	0	100	0	15.21	15.21	595.964	595.964	towed cam	SD	NE Atlantic	Hatton Bank	HS_C5	HS_C5_11	Bullimore et al., 2013	Kerry Howell
803	HS_C5_12	0	0.394477	0	0.723208	0.131492	0.131492	0	0	0	0	0	0	0	0	0	0.0657462	0	0	0	0	0.0657462	6	1.51216	0.394477		Count	M	0	100	0	15.21	15.21	595.503	595.503	towed cam	SD	NE Atlantic	Hatton Bank	HS_C5	HS_C5_12	Bullimore et al., 2013	Kerry Howell
804	HS_C5_14	0	0.0657462	0	0	0.328731	0.0657462	0	0	0	0	0	0	0	0	0	0	0	0	0	0	0.197239	4	0.657462	0.262985		Count	Mi	100	0	0	15.21	15.21	597.415	597.415	towed cam	SD	NE Atlantic	Hatton Bank	HS_C5	HS_C5_14	Bullimore et al., 2013	Kerry Howell
805	HS_C5_15	0	0.131492	0	0.131492	0.197239	0	0	0	0	0	0	0	0	0	0	0.0657462	0	0	0	0	0.0657462	5	0.591716	0.328731		Count	Y	100	0	0	15.21	15.21	606.075	606.075	towed cam	SD	NE Atlantic	Hatton Bank	HS_C5	HS_C5_15	Bullimore et al., 2013	Kerry Howell
806	HS_C5_16	0	0.131492	0	0.197239	0.131492	0.131492	0	0	0	0	0	0	0	0	0	0	0	0	0	0	0	4	0.591716	0.262985		Count	Y	100	0	0	15.21	15.21	610.167	610.167	towed cam	SD	NE Atlantic	Hatton Bank	HS_C5	HS_C5_16	Bullimore et al., 2013	Kerry Howell
807	HS_C5_17	0	0.0657462	0	0	0.131492	0.131492	0	0	0	0.0657462	0	0.0657462	0	0	0	0	0	0	0	0	0.0657462	6	0.52597	0.394477		Count	Mi	100	0	0	15.21	15.21	611.2	611.2	towed cam	SD	NE Atlantic	Hatton Bank	HS_C5	HS_C5_17	Bullimore et al., 2013	Kerry Howell
808	HS_C5_19	0.262985	0.131492	0	0.197239	0	0.0657462	0	0	0	0	0	0	0	0	0	0	0	0	0	0	0	4	0.657462	0.262985		Count	M	0	100	0	15.21	15.21	614.788	614.788	towed cam	SD	NE Atlantic	Hatton Bank	HS_C5	HS_C5_19	Bullimore et al., 2013	Kerry Howell
809	HS_C5_21	0.131492	0	0	0.262985	0.0657462	0.131492	0	0	0	0	0.0657462	0	0	0	0	0	0	0	0	0	0	5	0.657462	0.328731		Count	M	0	100	0	15.21	15.21	617.445	617.445	towed cam	SD	NE Atlantic	Hatton Bank	HS_C5	HS_C5_21	Bullimore et al., 2013	Kerry Howell
810	HS_C5_22	0.131492	0	0	0.0657462	0	0.0657462	0	0	0	0	0	0.0657462	0	0	0	0	0	0	0	0	0	4	0.328731	0.262985		Count	M	0	100	0	15.21	15.21	618.621	618.621	towed cam	SD	NE Atlantic	Hatton Bank	HS_C5	HS_C5_22	Bullimore et al., 2013	Kerry Howell
811	HS_C5_23	0.131492	0.0657462	0	0.657462	0.0657462	0.262985	0	0	0	0	0	0	0	0	0	0	0	0	0	0	0	5	1.18343	0.328731		Count	M	0	100	0	15.21	15.21	618.37	618.37	towed cam	SD	NE Atlantic	Hatton Bank	HS_C5	HS_C5_23	Bullimore et al., 2013	Kerry Howell
812	HS_C5_24	0.0657462	0	0	0.262985	0.131492	0.131492	0	0	0	0	0.0657462	0	0	0	0	0	0	0	0	0	0	5	0.657462	0.328731		Count	Y	0	100	0	15.21	15.21	619.716	619.716	towed cam	SD	NE Atlantic	Hatton Bank	HS_C5	HS_C5_24	Bullimore et al., 2013	Kerry Howell
813	HS_C5_25	0.197239	0	0	0.52597	0.131492	0.0657462	0	0	0	0	0.0657462	0	0	0	0	0.0657462	0	0	0	0	0.0657462	7	1.11769	0.460224		Count	Y	0	100	0	15.21	15.21	620.123	620.123	towed cam	SD	NE Atlantic	Hatton Bank	HS_C5	HS_C5_25	Bullimore et al., 2013	Kerry Howell
814	HS_C5_26	0.262985	0	0	0.262985	0.131492	0.131492	0	0	0	0	0.131492	0	0	0	0	0	0	0	0	0	0	5	0.920447	0.328731		Count	Y	0	100	0	15.21	15.21	619.78	619.78	towed cam	SD	NE Atlantic	Hatton Bank	HS_C5	HS_C5_26	Bullimore et al., 2013	Kerry Howell
815	HS_C5_27	0.131492	0	0	0.328731	0.0657462	0	0	0	0	0	0	0	0	0	0	0	0	0	0	0	0	3	0.52597	0.197239		Count	Y	0	100	0	15.21	15.21	621.168	621.168	towed cam	SD	NE Atlantic	Hatton Bank	HS_C5	HS_C5_27	Bullimore et al., 2013	Kerry Howell
816	HS_C5_28	0.262985	0	0	0.52597	0.0657462	0	0	0	0	0	0.0657462	0.0657462	0	0	0	0.197239	0	0	0	0	0	6	1.18343	0.394477		Count	Y	0	100	0	15.21	15.21	621.433	621.433	towed cam	SD	NE Atlantic	Hatton Bank	HS_C5	HS_C5_28	Bullimore et al., 2013	Kerry Howell
817	HS_C5_29	0.197239	0	0	0.131492	0.131492	0	0	0	0	0	0.0657462	0	0	0	0	0.0657462	0	0	0	0	0	5	0.591716	0.328731		Count	M	0	100	0	15.21	15.21	621.989	621.989	towed cam	SD	NE Atlantic	Hatton Bank	HS_C5	HS_C5_29	Bullimore et al., 2013	Kerry Howell
818	HS_C5_3	0.328731	0.0657462	0	0.0657462	0.0657462	0.197239	0	0	0	0.0657462	0	0	0	0	0	0	0	0	0	0	0.0657462	7	0.854701	0.460224		Count	Mi	100	0	0	15.21	15.21	593.968	593.968	towed cam	SD	NE Atlantic	Hatton Bank	HS_C5	HS_C5_3	Bullimore et al., 2013	Kerry Howell
819	HS_C5_30	0.131492	0	0	0.0657462	0.0657462	0.0657462	0	0	0	0	0	0	0	0	0	0	0	0	0	0	0	4	0.328731	0.262985		Count	M	0	100	0	15.21	15.21	622.334	622.334	towed cam	SD	NE Atlantic	Hatton Bank	HS_C5	HS_C5_30	Bullimore et al., 2013	Kerry Howell
820	HS_C5_33	0.0657462	0	0	0.394477	0	0	0	0	0	0	0.131492	0	0	0	0	0.131492	0	0	0	0	0.0657462	5	0.788955	0.328731		Count	M	0	100	0	15.21	15.21	623.38	623.38	towed cam	SD	NE Atlantic	Hatton Bank	HS_C5	HS_C5_33	Bullimore et al., 2013	Kerry Howell
821	HS_C5_35	0.0657462	0	0	0.262985	0	0	0	0	0	0	0.197239	0.0657462	0	0	0	0.131492	0	0	0	0	0	5	0.723208	0.328731		Count	N	0	40	60	15.21	15.21	624.037	624.037	towed cam	SD	NE Atlantic	Hatton Bank	HS_C5	HS_C5_35	Bullimore et al., 2013	Kerry Howell
822	HS_C5_36	0.197239	0	0	0	0	0	0	0	0	0	0.0657462	0	0	0	0	0.131492	0	0	0	0	0	3	0.394477	0.197239		Count	N	0	40	60	15.21	15.21	624.583	624.583	towed cam	SD	NE Atlantic	Hatton Bank	HS_C5	HS_C5_36	Bullimore et al., 2013	Kerry Howell
823	HS_C5_37	0.0657462	0	0	0	0	0	0	0	0	0	0	0	0	0	0	0	0	0	0	0	0	1	0.0657462	0.0657462		Count	N	0	40	60	15.21	15.21	625.154	625.154	towed cam	SD	NE Atlantic	Hatton Bank	HS_C5	HS_C5_37	Bullimore et al., 2013	Kerry Howell
824	HS_C5_38	0	0	0	0	0	0.0657462	0	0	0	0	0	0	0	0	0	0.0657462	0	0	0	0	0	2	0.131492	0.131492		Count	N	0	40	60	15.21	15.21	625.66	625.66	towed cam	SD	NE Atlantic	Hatton Bank	HS_C5	HS_C5_38	Bullimore et al., 2013	Kerry Howell
825	HS_C5_39	0	0	0	0	0.0657462	0	0	0.0657462	0	0	0	0	0	0	0	0	0	0	0	0	0	2	0.131492	0.131492		Count	N	0	40	60	15.21	15.21	625.233	625.233	towed cam	SD	NE Atlantic	Hatton Bank	HS_C5	HS_C5_39	Bullimore et al., 2013	Kerry Howell
826	HS_C5_40	0	0	0	0	0.0657462	0	0	0	0	0	0	0	0	0	0	0	0	0	0	0	0	1	0.0657462	0.0657462		Count	N	0	40	60	15.21	15.21	626.811	626.811	towed cam	SD	NE Atlantic	Hatton Bank	HS_C5	HS_C5_40	Bullimore et al., 2013	Kerry Howell
827	HS_C5_41	0	0	0	0	0.0657462	0	0	0	0	0	0	0	0	0	0	0.197239	0	0	0	0	0	2	0.262985	0.131492		Count	N	0	40	60	15.21	15.21	626.587	626.587	towed cam	SD	NE Atlantic	Hatton Bank	HS_C5	HS_C5_41	Bullimore et al., 2013	Kerry Howell
829	HS_C5_43	0	0	0	0	0.0657462	0	0	0	0	0	0.0657462	0	0	0	0	0	0	0	0	0	0	2	0.131492	0.131492		Count	N	0	40	60	15.21	15.21	627.042	627.042	towed cam	SD	NE Atlantic	Hatton Bank	HS_C5	HS_C5_43	Bullimore et al., 2013	Kerry Howell
832	HS_C5_46	0.0657462	0	0	0	0	0	0	0	0	0	0	0	0	0	0	0	0	0	0	0	0	1	0.0657462	0.0657462		Count	N	0	40	60	15.21	15.21	628.934	628.934	towed cam	SD	NE Atlantic	Hatton Bank	HS_C5	HS_C5_46	Bullimore et al., 2013	Kerry Howell
834	HS_C5_48	0	0	0	0	0.0657462	0	0	0	0	0	0	0	0	0	0	0	0	0	0	0	0	1	0.0657462	0.0657462		Count	N	0	40	60	15.21	15.21	630.244	630.244	towed cam	SD	NE Atlantic	Hatton Bank	HS_C5	HS_C5_48	Bullimore et al., 2013	Kerry Howell
835	HS_C5_49	0	0	0	0	0.0657462	0	0	0	0	0	0	0	0	0	0	0	0	0	0	0	0	1	0.0657462	0.0657462		Count	N	0	40	60	15.21	15.21	630.447	630.447	towed cam	SD	NE Atlantic	Hatton Bank	HS_C5	HS_C5_49	Bullimore et al., 2013	Kerry Howell
836	HS_C5_50	0	0	0	0	0	0.0657462	0	0	0	0	0	0	0	0	0	0	0	0	0	0	0	1	0.0657462	0.0657462		Count	N	0	40	60	15.21	15.21	630.042	630.042	towed cam	SD	NE Atlantic	Hatton Bank	HS_C5	HS_C5_50	Bullimore et al., 2013	Kerry Howell
838	HS_C5_52	0.0657462	0.0657462	0	0	0	0.0657462	0	0	0	0	0	0	0	0	0	0	0	0	0	0	0	3	0.197239	0.197239		Count	N	0	40	60	15.21	15.21	631.011	631.011	towed cam	SD	NE Atlantic	Hatton Bank	HS_C5	HS_C5_52	Bullimore et al., 2013	Kerry Howell
840	HS_C5_54	0	0	0	0	0	0	0	0	0	0	0	0	0	0	0	0.0657462	0	0	0	0	0	1	0.0657462	0.0657462		Count	N	0	40	60	15.21	15.21	631.634	631.634	towed cam	SD	NE Atlantic	Hatton Bank	HS_C5	HS_C5_54	Bullimore et al., 2013	Kerry Howell
843	HS_C5_58	0.0657462	0	0	0	0	0	0	0	0	0	0	0	0	0	0	0	0	0	0	0	0	1	0.0657462	0.0657462		Count	N	0	60	40	15.21	15.21	633.436	633.436	towed cam	SD	NE Atlantic	Hatton Bank	HS_C5	HS_C5_58	Bullimore et al., 2013	Kerry Howell
844	HS_C5_59	0.0657462	0	0	0	0	0	0	0	0	0	0	0	0	0	0	0.0657462	0	0	0	0	0	2	0.131492	0.131492		Count	N	0	60	40	15.21	15.21	634.002	634.002	towed cam	SD	NE Atlantic	Hatton Bank	HS_C5	HS_C5_59	Bullimore et al., 2013	Kerry Howell
845	HS_C5_6	0.328731	0.0657462	0	0.262985	0.0657462	0	0	0	0	0	0	0	0	0	0	0	0	0	0	0	0	4	0.723208	0.262985		Count	M	0	100	0	15.21	15.21	595.738	595.738	towed cam	SD	NE Atlantic	Hatton Bank	HS_C5	HS_C5_6	Bullimore et al., 2013	Kerry Howell
847	HS_C5_61	0	0	0	0	0.0657462	0	0	0	0	0	0	0	0	0	0	0	0	0	0	0	0	1	0.0657462	0.0657462		Count	N	0	60	40	15.21	15.21	634.697	634.697	towed cam	SD	NE Atlantic	Hatton Bank	HS_C5	HS_C5_61	Bullimore et al., 2013	Kerry Howell
849	HS_C5_9	0.262985	0.0657462	0	0.197239	0.0657462	0.197239	0	0	0	0.0657462	0	0.0657462	0	0	0	0.131492	0	0	0	0	0	8	1.05194	0.52597		Count	M	0	100	0	15.21	15.21	595.851	595.851	towed cam	SD	NE Atlantic	Hatton Bank	HS_C5	HS_C5_9	Bullimore et al., 2013	Kerry Howell
853	HS2_3_12	0	0	0	0	0	0.0657462	0	0	0	0	0	0	0	0	0	0	0	0	0	0	0	1	0.0657462	0.0657462		Count	N	0	0	100	15.21	15.21	848.269	848.269	towed cam	SD	NE Atlantic	Hatton Bank	HS2_3	HS2_3_12	Bullimore et al., 2013	Kerry Howell
856	HS2_3_15	0	0	0	0	0	0.0657462	0	0	0	0	0	0	0	0	0	0	0	0	0	0	0	1	0.0657462	0.0657462		Count	N	0	0	100	15.21	15.21	845.463	845.463	towed cam	SD	NE Atlantic	Hatton Bank	HS2_3	HS2_3_15	Bullimore et al., 2013	Kerry Howell
859	HS2_3_18	0	0	0	0	0	0	0	0	0	0	0	0	0	0	0	0.0657462	0	0	0	0	0	1	0.0657462	0.0657462		Count	N	0	0	100	15.21	15.21	844.378	844.378	towed cam	SD	NE Atlantic	Hatton Bank	HS2_3	HS2_3_18	Bullimore et al., 2013	Kerry Howell
860	HS2_3_19	0	0	0.0657462	0	0	0	0	0	0	0	0	0	0	0	0	0.0657462	0	0	0	0	0	2	0.131492	0.131492		Count	N	0	0	100	15.21	15.21	844.128	844.128	towed cam	SD	NE Atlantic	Hatton Bank	HS2_3	HS2_3_19	Bullimore et al., 2013	Kerry Howell
861	HS2_3_20	0	0	0.0657462	0	0	0.0657462	0	0	0	0	0	0	0	0	0	0	0	0	0	0	0	2	0.131492	0.131492		Count	N	0	0	100	15.21	15.21	843.904	843.904	towed cam	SD	NE Atlantic	Hatton Bank	HS2_3	HS2_3_20	Bullimore et al., 2013	Kerry Howell
862	HS2_3_21	0	0	0	0	0	0.328731	0	0	0	0	0	0	0	0	0	0	0	0	0	0	0	1	0.328731	0.0657462		Count	N	0	0	100	15.21	15.21	843.002	843.002	towed cam	SD	NE Atlantic	Hatton Bank	HS2_3	HS2_3_21	Bullimore et al., 2013	Kerry Howell
863	HS2_3_22	0	0	0	0	0	0.0657462	0	0	0	0	0	0	0	0	0	0	0	0	0	0	0	1	0.0657462	0.0657462		Count	N	0	0	100	15.21	15.21	842.585	842.585	towed cam	SD	NE Atlantic	Hatton Bank	HS2_3	HS2_3_22	Bullimore et al., 2013	Kerry Howell
864	HS2_3_24	0	0	0	0	0	0.0657462	0	0	0	0	0	0	0	0	0	0.0657462	0	0	0	0	0	2	0.131492	0.131492		Count	N	0	0	100	15.21	15.21	841.539	841.539	towed cam	SD	NE Atlantic	Hatton Bank	HS2_3	HS2_3_24	Bullimore et al., 2013	Kerry Howell
865	HS2_3_25	0	0	0	0	0	0.0657462	0	0	0	0	0	0	0	0	0	0	0	0	0	0	0	1	0.0657462	0.0657462		Count	N	0	0	100	15.21	15.21	841.592	841.592	towed cam	SD	NE Atlantic	Hatton Bank	HS2_3	HS2_3_25	Bullimore et al., 2013	Kerry Howell
866	HS2_3_26	0	0	0	0	0	0.0657462	0	0	0	0	0	0	0	0	0	0	0	0	0	0	0	1	0.0657462	0.0657462		Count	N	0	0	100	15.21	15.21	840.691	840.691	towed cam	SD	NE Atlantic	Hatton Bank	HS2_3	HS2_3_26	Bullimore et al., 2013	Kerry Howell
867	HS2_3_27	0	0	0	0	0	0.0657462	0	0	0	0	0	0	0	0	0	0	0	0	0	0	0	1	0.0657462	0.0657462		Count	N	0	0	100	15.21	15.21	840.603	840.603	towed cam	SD	NE Atlantic	Hatton Bank	HS2_3	HS2_3_27	Bullimore et al., 2013	Kerry Howell
868	HS2_3_30	0	0	0	0	0	0	0	0	0	0	0	0	0	0	0	0.131492	0	0	0	0	0	1	0.131492	0.0657462		Count	N	0	0	100	15.21	15.21	838.688	838.688	towed cam	SD	NE Atlantic	Hatton Bank	HS2_3	HS2_3_30	Bullimore et al., 2013	Kerry Howell
869	HS2_3_31	0	0	0	0	0	0.0657462	0	0.0657462	0	0	0	0	0	0	0	0	0	0	0	0	0	2	0.131492	0.131492		Count	N	0	0	100	15.21	15.21	838.875	838.875	towed cam	SD	NE Atlantic	Hatton Bank	HS2_3	HS2_3_31	Bullimore et al., 2013	Kerry Howell
870	HS2_3_32	0	0	0	0	0	0.0657462	0	0	0	0	0	0	0	0	0	0	0	0	0	0	0	1	0.0657462	0.0657462		Count	N	0	0	100	15.21	15.21	837.799	837.799	towed cam	SD	NE Atlantic	Hatton Bank	HS2_3	HS2_3_32	Bullimore et al., 2013	Kerry Howell
871	HS2_3_33	0.0657462	0	0	0	0	0.0657462	0	0	0	0	0	0	0	0	0	0	0	0	0	0	0	2	0.131492	0.131492		Count	N	0	100	0	15.21	15.21	836.057	836.057	towed cam	SD	NE Atlantic	Hatton Bank	HS2_3	HS2_3_33	Bullimore et al., 2013	Kerry Howell
872	HS2_3_37	0	0	0	0	0	0.0657462	0	0	0	0	0	0	0	0	0	0	0	0	0	0	0	1	0.0657462	0.0657462		Count	N	0	0	100	15.21	15.21	837.345	837.345	towed cam	SD	NE Atlantic	Hatton Bank	HS2_3	HS2_3_37	Bullimore et al., 2013	Kerry Howell
873	HS2_3_38	0	0	0	0	0	0.0657462	0	0	0	0	0	0	0	0	0	0	0	0	0	0	0	1	0.0657462	0.0657462		Count	N	0	0	100	15.21	15.21	837.179	837.179	towed cam	SD	NE Atlantic	Hatton Bank	HS2_3	HS2_3_38	Bullimore et al., 2013	Kerry Howell
874	HS2_3_39	0	0	0	0	0	0	0	0	0	0	0	0	0	0	0	0.0657462	0	0	0	0	0.0657462	2	0.131492	0.131492		Count	N	0	0	100	15.21	15.21	838.052	838.052	towed cam	SD	NE Atlantic	Hatton Bank	HS2_3	HS2_3_39	Bullimore et al., 2013	Kerry Howell
875	HS2_3_4	0	0	0	0	0	0	0	0.0657462	0	0	0	0	0	0	0	0	0	0	0	0	0	1	0.0657462	0.0657462		Count	N	0	0	100	15.21	15.21	852.191	852.191	towed cam	SD	NE Atlantic	Hatton Bank	HS2_3	HS2_3_4	Bullimore et al., 2013	Kerry Howell
876	HS2_3_41	0	0	0	0	0	0	0	0.0657462	0	0	0	0	0	0	0	0	0	0	0	0	0	1	0.0657462	0.0657462		Count	N	0	0	100	15.21	15.21	837.306	837.306	towed cam	SD	NE Atlantic	Hatton Bank	HS2_3	HS2_3_41	Bullimore et al., 2013	Kerry Howell
877	HS2_3_42	0	0	0	0	0	0	0	0.262985	0	0	0	0	0	0	0	0	0	0	0	0	0	1	0.262985	0.0657462		Count	N	0	0	100	15.21	15.21	838.085	838.085	towed cam	SD	NE Atlantic	Hatton Bank	HS2_3	HS2_3_42	Bullimore et al., 2013	Kerry Howell
878	HS2_3_43	0.0657462	0	0	0	0	0	0	0.262985	0	0	0	0	0	0	0	0	0	0	0	0	0	2	0.328731	0.131492		Count	N	0	0	100	15.21	15.21	835.125	835.125	towed cam	SD	NE Atlantic	Hatton Bank	HS2_3	HS2_3_43	Bullimore et al., 2013	Kerry Howell
879	HS2_3_45	0.0657462	0	0	0	0	0.0657462	0	0.394477	0	0	0	0	0	0	0	0.0657462	0	0	0	0	0	4	0.591716	0.262985		Count	N	0	0	100	15.21	15.21	834.748	834.748	towed cam	SD	NE Atlantic	Hatton Bank	HS2_3	HS2_3_45	Bullimore et al., 2013	Kerry Howell
880	HS2_3_46	0	0	0	0	0	0	0	0.0657462	0	0	0	0	0	0	0	0	0	0	0	0	0	1	0.0657462	0.0657462		Count	N	0	0	100	15.21	15.21	835.555	835.555	towed cam	SD	NE Atlantic	Hatton Bank	HS2_3	HS2_3_46	Bullimore et al., 2013	Kerry Howell
881	HS2_3_47	0.0657462	0	0	0	0	0.197239	0	0.0657462	0	0	0	0	0	0	0	0	0	0	0	0	0	3	0.328731	0.197239		Count	M	0	100	0	15.21	15.21	833.63	833.63	towed cam	SD	NE Atlantic	Hatton Bank	HS2_3	HS2_3_47	Bullimore et al., 2013	Kerry Howell
882	HS2_3_48	0.394477	0	0	0	0.131492	0.0657462	0	0.131492	0	0	0	0	0	0	0	0	0	0	0	0	0	4	0.723208	0.262985		Count	M	0	100	0	15.21	15.21	832.513	832.513	towed cam	SD	NE Atlantic	Hatton Bank	HS2_3	HS2_3_48	Bullimore et al., 2013	Kerry Howell
883	HS2_3_5	0	0	0	0	0	0	0	0.0657462	0	0	0	0	0	0	0	0	0	0	0	0	0	1	0.0657462	0.0657462		Count	N	0	0	100	15.21	15.21	851.051	851.051	towed cam	SD	NE Atlantic	Hatton Bank	HS2_3	HS2_3_5	Bullimore et al., 2013	Kerry Howell
884	HS2_3_50	0.0657462	0	0	0	0	0	0	0.460224	0	0	0	0	0	0	0	0	0	0	0	0	0	2	0.52597	0.131492		Count	N	0	0	100	15.21	15.21	833.66	833.66	towed cam	SD	NE Atlantic	Hatton Bank	HS2_3	HS2_3_50	Bullimore et al., 2013	Kerry Howell
885	HS2_3_51	0	0	0	0	0	0	0	0.0657462	0	0	0	0	0	0	0	0	0	0	0	0	0	1	0.0657462	0.0657462		Count	N	0	0	100	15.21	15.21	834.658	834.658	towed cam	SD	NE Atlantic	Hatton Bank	HS2_3	HS2_3_51	Bullimore et al., 2013	Kerry Howell
886	HS2_3_53	0	0	0	0	0	0.131492	0	0.262985	0	0	0	0	0	0	0	0.131492	0	0	0	0	0	3	0.52597	0.197239		Count	N	0	0	100	15.21	15.21	832.027	832.027	towed cam	SD	NE Atlantic	Hatton Bank	HS2_3	HS2_3_53	Bullimore et al., 2013	Kerry Howell
887	HS2_3_54	0	0	0	0	0	0.131492	0	0.197239	0	0	0	0	0	0	0	0	0	0	0	0	0	2	0.328731	0.131492		Count	N	0	0	100	15.21	15.21	832.801	832.801	towed cam	SD	NE Atlantic	Hatton Bank	HS2_3	HS2_3_54	Bullimore et al., 2013	Kerry Howell
888	HS2_3_6	0	0	0	0	0	0	0	0.0657462	0	0	0	0	0	0	0	0	0	0	0	0	0	1	0.0657462	0.0657462		Count	N	0	0	100	15.21	15.21	851.288	851.288	towed cam	SD	NE Atlantic	Hatton Bank	HS2_3	HS2_3_6	Bullimore et al., 2013	Kerry Howell
889	HS2_3_8	0	0	0	0	0	0.0657462	0	0	0	0	0	0	0	0	0	0	0	0	0	0	0	1	0.0657462	0.0657462		Count	N	0	0	100	15.21	15.21	850.743	850.743	towed cam	SD	NE Atlantic	Hatton Bank	HS2_3	HS2_3_8	Bullimore et al., 2013	Kerry Howell
890	HS2_3_9	0	0	0	0	0	0	0	0	0	0	0	0	0	0	0	0.0657462	0	0	0	0	0	1	0.0657462	0.0657462		Count	N	0	0	100	15.21	15.21	850.648	850.648	towed cam	SD	NE Atlantic	Hatton Bank	HS2_3	HS2_3_9	Bullimore et al., 2013	Kerry Howell
891	HT_C2_10	0.262985	0	0	0	0	0	0	0	0	0	0	0	0	0	0	0.0657462	0	0	0	0	0	2	0.328731	0.131492		Count	M	0	100	0	15.21	15.21	620.376	620.376	towed cam	SD	NE Atlantic	Hatton Bank	HT_C2	HT_C2_10	Bullimore et al., 2013	Kerry Howell
892	HT_C2_11	0.197239	0	0	0.0657462	0.0657462	0.328731	0	0	0	0	0	0.0657462	0	0	0	0.0657462	0	0	0	0	0	6	0.788955	0.394477		Count	M	0	100	0	15.21	15.21	619.641	619.641	towed cam	SD	NE Atlantic	Hatton Bank	HT_C2	HT_C2_11	Bullimore et al., 2013	Kerry Howell
893	HT_C2_12	0	0	0	0	0.0657462	0.52597	0	0	0	0	0	0	0	0	0	0.197239	0	0	0	0	0	3	0.788955	0.197239		Count	M	0	100	0	15.21	15.21	618.33	618.33	towed cam	SD	NE Atlantic	Hatton Bank	HT_C2	HT_C2_12	Bullimore et al., 2013	Kerry Howell
894	HT_C2_13	0	0.0657462	0	0.0657462	0.131492	0.657462	0	0	0	0	0	0	0	0	0	0.0657462	0	0	0	0	0	5	0.986193	0.328731		Count	M	0	100	0	15.21	15.21	618.174	618.174	towed cam	SD	NE Atlantic	Hatton Bank	HT_C2	HT_C2_13	Bullimore et al., 2013	Kerry Howell
895	HT_C2_14	0	0.0657462	0	0.0657462	0.262985	0.460224	0	0	0	0	0.0657462	0	0	0	0	0.0657462	0	0	0	0	0	6	0.986193	0.394477		Count	M	0	100	0	15.21	15.21	617.843	617.843	towed cam	SD	NE Atlantic	Hatton Bank	HT_C2	HT_C2_14	Bullimore et al., 2013	Kerry Howell
896	HT_C2_15	0	0	0	0.0657462	0	0.591716	0	0	0	0	0	0	0	0	0	0.0657462	0	0	0	0	0	3	0.723208	0.197239		Count	M	0	100	0	15.21	15.21	617.533	617.533	towed cam	SD	NE Atlantic	Hatton Bank	HT_C2	HT_C2_15	Bullimore et al., 2013	Kerry Howell
897	HT_C2_16	0	0.0657462	0	0	0.131492	0.723208	0	0	0.0657462	0	0	0	0	0	0	0.0657462	0	0	0	0	0	5	1.05194	0.328731		Count	M	0	100	0	15.21	15.21	617.616	617.616	towed cam	SD	NE Atlantic	Hatton Bank	HT_C2	HT_C2_16	Bullimore et al., 2013	Kerry Howell
898	HT_C2_17	0	0.394477	0	0.262985	0.131492	0.460224	0	0	0	0	0	0	0	0	0	0.0657462	0	0	0	0	0	5	1.31492	0.328731		Count	M	0	100	0	15.21	15.21	617.527	617.527	towed cam	SD	NE Atlantic	Hatton Bank	HT_C2	HT_C2_17	Bullimore et al., 2013	Kerry Howell
899	HT_C2_18	0	0.131492	0	0	0.197239	0.328731	0.0657462	0	0	0	0	0	0	0	0	0	0	0	0	0	0	4	0.723208	0.262985		Count	M	0	100	0	15.21	15.21	618.504	618.504	towed cam	SD	NE Atlantic	Hatton Bank	HT_C2	HT_C2_18	Bullimore et al., 2013	Kerry Howell
900	HT_C2_19	0	0.328731	0	0.197239	0.0657462	0.591716	0	0	0	0	0.262985	0	0	0	0	0.0657462	0	0	0	0	0	6	1.51216	0.394477		Count	M	0	100	0	15.21	15.21	618.449	618.449	towed cam	SD	NE Atlantic	Hatton Bank	HT_C2	HT_C2_19	Bullimore et al., 2013	Kerry Howell
901	HT_C2_20	0	0.197239	0	0.0657462	0.0657462	0.52597	0	0	0	0	0.262985	0	0	0	0	0.0657462	0	0	0	0	0	6	1.18343	0.394477		Count	M	0	100	0	15.21	15.21	619.235	619.235	towed cam	SD	NE Atlantic	Hatton Bank	HT_C2	HT_C2_20	Bullimore et al., 2013	Kerry Howell
902	HT_C2_21	0	0.262985	0	0.0657462	0.131492	0.131492	0	0	0	0	0.131492	0	0	0	0	0.131492	0	0	0	0	0	6	0.854701	0.394477		Count	M	0	100	0	15.21	15.21	619.464	619.464	towed cam	SD	NE Atlantic	Hatton Bank	HT_C2	HT_C2_21	Bullimore et al., 2013	Kerry Howell
903	HT_C2_22	0	0.328731	0	0.131492	0	0.0657462	0	0	0	0	0	0	0	0	0	0.197239	0	0	0	0	0.0657462	5	0.788955	0.328731		Count	M	0	100	0	15.21	15.21	619.906	619.906	towed cam	SD	NE Atlantic	Hatton Bank	HT_C2	HT_C2_22	Bullimore et al., 2013	Kerry Howell
904	HT_C2_23	0	0.197239	0	0.131492	0.0657462	0.262985	0	0	0	0	0	0	0	0	0	0	0	0	0	0	0	4	0.657462	0.262985		Count	M	0	100	0	15.21	15.21	620.66	620.66	towed cam	SD	NE Atlantic	Hatton Bank	HT_C2	HT_C2_23	Bullimore et al., 2013	Kerry Howell
905	HT_C2_24	0	0.262985	0	0	0.0657462	0.657462	0	0	0	0	0.0657462	0	0	0	0	0	0	0	0	0	0	4	1.05194	0.262985		Count	Y	0	100	0	15.21	15.21	620.821	620.821	towed cam	SD	NE Atlantic	Hatton Bank	HT_C2	HT_C2_24	Bullimore et al., 2013	Kerry Howell
906	HT_C2_25	0	0.262985	0	0	0.0657462	0.394477	0	0	0	0	0	0	0	0	0	0	0	0	0	0	0	3	0.723208	0.197239		Count	Y	0	100	0	15.21	15.21	621.737	621.737	towed cam	SD	NE Atlantic	Hatton Bank	HT_C2	HT_C2_25	Bullimore et al., 2013	Kerry Howell
907	HT_C2_26	0	0.328731	0	0	0.0657462	0.394477	0	0	0	0	0.131492	0	0	0	0	0.197239	0	0	0	0	0	5	1.11769	0.328731		Count	Y	0	100	0	15.21	15.21	621.827	621.827	towed cam	SD	NE Atlantic	Hatton Bank	HT_C2	HT_C2_26	Bullimore et al., 2013	Kerry Howell
908	HT_C2_27	0	0.262985	0	0	0.131492	0.328731	0	0	0	0	0	0	0	0	0	0	0	0	0	0	0	3	0.723208	0.197239		Count	Y	0	100	0	15.21	15.21	622.57	622.57	towed cam	SD	NE Atlantic	Hatton Bank	HT_C2	HT_C2_27	Bullimore et al., 2013	Kerry Howell
909	HT_C2_28	0	0.197239	0	0	0.0657462	0.591716	0	0	0	0	0.0657462	0	0	0	0	0	0	0	0	0	0	4	0.920447	0.262985		Count	Y	0	100	0	15.21	15.21	622.877	622.877	towed cam	SD	NE Atlantic	Hatton Bank	HT_C2	HT_C2_28	Bullimore et al., 2013	Kerry Howell
910	HT_C2_29	0	0.328731	0	0	0	0.197239	0	0	0	0	0.0657462	0	0	0	0	0.131492	0	0	0	0	0	4	0.723208	0.262985		Count	Y	0	100	0	15.21	15.21	623.641	623.641	towed cam	SD	NE Atlantic	Hatton Bank	HT_C2	HT_C2_29	Bullimore et al., 2013	Kerry Howell
911	HT_C2_3	0.0657462	0	0	0	0	0	0	0	0	0.0657462	0	0	0	0	0	0	0	0	0	0	0	2	0.131492	0.131492		Count	N	0	0	100	15.21	15.21	620.138	620.138	towed cam	SD	NE Atlantic	Hatton Bank	HT_C2	HT_C2_3	Bullimore et al., 2013	Kerry Howell
912	HT_C2_30	0	0.0657462	0	0	0.0657462	0.262985	0	0	0	0	0.0657462	0	0	0	0	0.0657462	0	0	0	0	0	5	0.52597	0.328731		Count	M	0	100	0	15.21	15.21	624.108	624.108	towed cam	SD	NE Atlantic	Hatton Bank	HT_C2	HT_C2_30	Bullimore et al., 2013	Kerry Howell
913	HT_C2_31	0	0.197239	0	0.0657462	0	0.262985	0	0	0	0	0.131492	0	0	0	0	0	0	0	0	0	0	4	0.657462	0.262985		Count	M	0	100	0	15.21	15.21	624.511	624.511	towed cam	SD	NE Atlantic	Hatton Bank	HT_C2	HT_C2_31	Bullimore et al., 2013	Kerry Howell
914	HT_C2_32	0	0.131492	0	0.0657462	0.0657462	0.131492	0	0	0	0	0.0657462	0	0	0	0	0.0657462	0	0	0	0	0	6	0.52597	0.394477		Count	M	0	100	0	15.21	15.21	625.445	625.445	towed cam	SD	NE Atlantic	Hatton Bank	HT_C2	HT_C2_32	Bullimore et al., 2013	Kerry Howell
915	HT_C2_33	0	0.0657462	0	0	0.131492	0.460224	0	0	0	0	0.0657462	0	0	0	0	0.131492	0	0	0	0	0	5	0.854701	0.328731		Count	M	0	100	0	15.21	15.21	626.427	626.427	towed cam	SD	NE Atlantic	Hatton Bank	HT_C2	HT_C2_33	Bullimore et al., 2013	Kerry Howell
916	HT_C2_34	0	0.197239	0	0	0	0.197239	0	0	0	0	0.131492	0	0	0	0	0.131492	0	0	0	0	0	4	0.657462	0.262985		Count	M	0	100	0	15.21	15.21	628.447	628.447	towed cam	SD	NE Atlantic	Hatton Bank	HT_C2	HT_C2_34	Bullimore et al., 2013	Kerry Howell
917	HT_C2_35	0.0657462	0	0	0	0	0.197239	0	0	0	0	0	0	0	0	0	0.131492	0	0	0	0	0	3	0.394477	0.197239		Count	N	0	0	100	15.21	15.21	631.402	631.402	towed cam	SD	NE Atlantic	Hatton Bank	HT_C2	HT_C2_35	Bullimore et al., 2013	Kerry Howell
918	HT_C2_36	0	0	0	0	0	0.0657462	0	0	0	0	0	0	0	0	0	0.0657462	0	0	0	0	0	2	0.131492	0.131492		Count	N	0	0	100	15.21	15.21	634.66	634.66	towed cam	SD	NE Atlantic	Hatton Bank	HT_C2	HT_C2_36	Bullimore et al., 2013	Kerry Howell
919	HT_C2_37	0	0	0	0	0	0.0657462	0	0	0	0	0	0	0	0	0	0.0657462	0	0	0	0	0	2	0.131492	0.131492		Count	N	0	0	100	15.21	15.21	642.311	642.311	towed cam	SD	NE Atlantic	Hatton Bank	HT_C2	HT_C2_37	Bullimore et al., 2013	Kerry Howell
920	HT_C2_38	0	0	0	0	0	0.0657462	0	0	0	0.131492	0	0	0	0	0	0.0657462	0	0	0	0	0	3	0.262985	0.197239		Count	N	0	0	100	15.21	15.21	646.725	646.725	towed cam	SD	NE Atlantic	Hatton Bank	HT_C2	HT_C2_38	Bullimore et al., 2013	Kerry Howell
921	HT_C2_39	0	0	0	0	0	0.0657462	0	0	0	0	0.0657462	0	0	0	0	0	0	0	0	0	0	2	0.131492	0.131492		Count	N	0	0	100	15.21	15.21	649.681	649.681	towed cam	SD	NE Atlantic	Hatton Bank	HT_C2	HT_C2_39	Bullimore et al., 2013	Kerry Howell
922	HT_C2_4	0.197239	0	0	0	0	0.131492	0	0	0	0.0657462	0	0	0	0	0	0	0	0	0	0	0	3	0.394477	0.197239		Count	N	0	0	100	15.21	15.21	620.599	620.599	towed cam	SD	NE Atlantic	Hatton Bank	HT_C2	HT_C2_4	Bullimore et al., 2013	Kerry Howell
923	HT_C2_40	0.0657462	0	0	0	0	0.131492	0	0	0	0	0.0657462	0	0	0	0	0	0	0	0	0	0	3	0.262985	0.197239		Count	N	0	0	100	15.21	15.21	653.815	653.815	towed cam	SD	NE Atlantic	Hatton Bank	HT_C2	HT_C2_40	Bullimore et al., 2013	Kerry Howell
924	HT_C2_41	0	0.0657462	0	0	0	0.131492	0	0	0	0	0.131492	0	0	0	0	0.131492	0	0	0	0	0	4	0.460224	0.262985		Count	N	0	0	100	15.21	15.21	657.084	657.084	towed cam	SD	NE Atlantic	Hatton Bank	HT_C2	HT_C2_41	Bullimore et al., 2013	Kerry Howell
925	HT_C2_42	0	0.0657462	0	0	0	0	0	0	0	0	0.131492	0	0	0	0	0.131492	0	0	0	0	0	3	0.328731	0.197239		Count	N	0	0	100	15.21	15.21	660.185	660.185	towed cam	SD	NE Atlantic	Hatton Bank	HT_C2	HT_C2_42	Bullimore et al., 2013	Kerry Howell
926	HT_C2_43	0.0657462	0	0	0	0	0.197239	0	0	0	0	0.131492	0	0	0	0	0	0	0	0	0	0	3	0.394477	0.197239		Count	N	0	0	100	15.21	15.21	662.542	662.542	towed cam	SD	NE Atlantic	Hatton Bank	HT_C2	HT_C2_43	Bullimore et al., 2013	Kerry Howell
927	HT_C2_44	0.262985	0	0	0.131492	0	0.197239	0	0	0	0	0.0657462	0	0	0	0	0.0657462	0	0	0	0	0	5	0.723208	0.328731		Count	M	0	100	0	15.21	15.21	665.792	665.792	towed cam	SD	NE Atlantic	Hatton Bank	HT_C2	HT_C2_44	Bullimore et al., 2013	Kerry Howell
928	HT_C2_45	0.197239	0.131492	0	0.197239	0	0.131492	0	0	0	0.0657462	0.0657462	0	0	0	0	0	0	0	0	0	0	6	0.788955	0.394477		Count	M	0	100	0	15.21	15.21	668.093	668.093	towed cam	SD	NE Atlantic	Hatton Bank	HT_C2	HT_C2_45	Bullimore et al., 2013	Kerry Howell
929	HT_C2_46	0.131492	0.131492	0	0.394477	0.0657462	0.0657462	0	0	0	0	0.131492	0	0	0	0	0.131492	0	0	0	0	0	7	1.05194	0.460224		Count	Y	0	100	0	15.21	15.21	670.056	670.056	towed cam	SD	NE Atlantic	Hatton Bank	HT_C2	HT_C2_46	Bullimore et al., 2013	Kerry Howell
930	HT_C2_47	0.0657462	0.262985	0	0.197239	0	0.131492	0	0	0	0.197239	0.0657462	0	0	0	0	0	0	0	0	0	0	6	0.920447	0.394477		Count	Y	0	100	0	15.21	15.21	672.713	672.713	towed cam	SD	NE Atlantic	Hatton Bank	HT_C2	HT_C2_47	Bullimore et al., 2013	Kerry Howell
931	HT_C2_48	0.131492	0.0657462	0	0.328731	0	0.0657462	0	0	0	0.0657462	0.131492	0	0	0	0	0	0	0	0	0	0	6	0.788955	0.394477		Count	M	0	100	0	15.21	15.21	674.694	674.694	towed cam	SD	NE Atlantic	Hatton Bank	HT_C2	HT_C2_48	Bullimore et al., 2013	Kerry Howell
932	HT_C2_5	0.0657462	0	0	0	0	0	0	0	0	0.0657462	0	0	0	0	0	0	0	0	0	0	0	2	0.131492	0.131492		Count	N	0	0	100	15.21	15.21	621.416	621.416	towed cam	SD	NE Atlantic	Hatton Bank	HT_C2	HT_C2_5	Bullimore et al., 2013	Kerry Howell
933	HT_C2_7	0	0	0	0	0	0	0	0	0	0	0	0	0	0	0	0.0657462	0	0	0	0	0	1	0.0657462	0.0657462		Count	N	0	0	100	15.21	15.21	621.468	621.468	towed cam	SD	NE Atlantic	Hatton Bank	HT_C2	HT_C2_7	Bullimore et al., 2013	Kerry Howell
934	HT_C2_9	0	0	0	0	0	0	0	0	0	0	0	0	0	0	0	0.131492	0	0	0	0	0	1	0.131492	0.0657462		Count	N	0	0	100	15.21	15.21	621.809	621.809	towed cam	SD	NE Atlantic	Hatton Bank	HT_C2	HT_C2_9	Bullimore et al., 2013	Kerry Howell
935	Image 1	0	0	0	0	0	0.632911	0	0	0	0	0	0	0	0	0	0	0	0	0	0	0	1	0.632911	0.158228			n	0	10	90	6.32	6.32	1020	1020	towedcam	HD	NZ	Ghoul	56	36	Clark_etal_2019	M Clark
936	Image 2	0	0.266667	0	0	1.86667	0	10.5333	0	0	0.8	0	0	0	0	0	0	0.133333	0	0	0	0	5	13.6	0.666667			m	45	39	16	7.5	7.5	980	980	towedcam	HD	NZ	Ghoul	56	52	Clark_etal_2019	M Clark
937	Image 3	0	0.555556	0	0	1.33333	0	3.33333	0	0	3.33333	0	0	0	0	0.333333	0	0	0	0	0	0	5	8.88889	0.555556			y	91	5	4	9	9	940	940	towedcam	HD	NZ	Ghoul	56	56	Clark_etal_2019	M Clark
938	Image 4	0	3	0	0	1.5	0	3	0	0	6	0	0	0	0	1	0	0	0	0	0	0	5	14.5	2.5			y	100	0	0	2	2	930	930	towedcam	HD	NZ	Ghoul	56	60	Clark_etal_2019	M Clark
939	Image 5	0	9.52941	0	0	1.17647	0	0	0	0	2.94118	0.117647	0	0	0	0	0	0	0	0	0	0	4	13.7647	0.470588			y	93	3	4	8.5	8.5	950	950	towedcam	HD	NZ	Ghoul	56	64	Clark_etal_2019	M Clark
940	Image 6	0	0	0	0	0	0.30303	1.81818	0	0.606061	1.51515	0	0	0	0	0.909091	0	0	0	0	0	0	5	5.15152	1.51515			n	0	60	40	3.3	3.3	970	970	towedcam	HD	NZ	Ghoul	56	72	Clark_etal_2019	M Clark
941	Image 7	0	0	0	0	2.38095	0	2.77778	0	0	0	0	0	0	0	0	0	0	0	0	0	0	2	5.15873	0.793651			n	0	78	22	2.52	2.52	960	960	towedcam	HD	NZ	Ghoul	56	76	Clark_etal_2019	M Clark
942	Image 8	0	1.44231	0	0	4.80769	0.961538	44.7115	0	1.44231	3.36538	0	0	0	0	0	0	0.961538	0	0	0.480769	0	8	58.1731	3.84615			y	67	21	12	2.08	2.08	970	970	towedcam	HD	NZ	Ghoul	56	80	Clark_etal_2019	M Clark
943	Image 9	0	0	0	0	0.148368	0	0.148368	0	0	0	0	0	0	0	0	0	0	0	0	0	0	2	0.296736	0.296736			n	0	13	87	6.74	6.74	1000	1000	towedcam	HD	NZ	Ghoul	56	88	Clark_etal_2019	M Clark
944	Image 10	0	2.02703	0	0	0	0	0.675676	0	0	0	0	0	0	0	0	0	0	0	0	0	0	2	2.7027	1.35135			n	0	1	99	1.48	1.48	1005	1005	towedcam	HD	NZ	Ghoul	56	92	Clark_etal_2019	M Clark
945	Image 11	0	0	0	0	0.285714	0	0.428571	0	1	0	0	0	0	0	0	0	0	0	0	0	0	3	1.71429	0.428571			n	0	2	98	7	7	1010	1010	towedcam	HD	NZ	Ghoul	56	96	Clark_etal_2019	M Clark
946	Image 12	0	0	0	0	0	0.423729	0	0	0	0	0	0	0	0	0	0	0	0	0	0	0	1	0.423729	0.423729			n	0	0	100	2.36	2.36	1010	1010	towedcam	HD	NZ	Ghoul	56	120	Clark_etal_2019	M Clark
947	Image 13	0	0.977199	0	0	0	0	0	0	0	0	0	0	0	0	0	0	0	0	0	0	0	1	0.977199	0.325733			n	1	0	99	3.07	3.07	1000	1000	towedcam	HD	NZ	Ghoul	58	28	Clark_etal_2019	M Clark
948	Image 14	0	0	0	0	2.27273	0	0	0	0	0	0	0	0	0	0	0	0	0	0	0	0	1	2.27273	0.757576			n	0	1	99	1.32	1.32	990	990	towedcam	HD	NZ	Ghoul	58	44	Clark_etal_2019	M Clark
949	Image 15	0	0	0	0	0.450958	0.563698	0	0	0	0	0	0	0	0	0	0	0	0	0	0	0	2	1.01466	0.225479			n	78	7	15	8.87	8.87	965	965	towedcam	HD	NZ	Ghoul	58	52	Clark_etal_2019	M Clark
950	Image 16	0	0.125	0	0	0.25	0	0.375	0	0	0	0	0	0	0	0	0	0	0	0	0	0	3	0.75	0.375			m	5	73	22	8	8	940	940	towedcam	HD	NZ	Ghoul	58	56	Clark_etal_2019	M Clark
951	Image 17	0	6.08696	0	0	2.17391	0	0	0	0	16.5217	0	0	0	0	1.73913	0	0.434783	0	0	0	0	5	26.9565	2.17391			y	94	2	4	2.3	2.3	930	930	towedcam	HD	NZ	Ghoul	58	68	Clark_etal_2019	M Clark
952	Image 18	0	0.319489	0	0	1.27796	0	0.638978	0	0.638978	15.3355	0	0	0	0	0.319489	0	0	0	0	0	0	6	18.5304	1.91693			m	36	58	6	3.13	3.13	950	950	towedcam	HD	NZ	Ghoul	58	72	Clark_etal_2019	M Clark
953	Image 19	0	0	0	0	0.222222	0	0.666667	0	0	0.222222	0	0	0	0	0	0	0	0	0	0	0	3	1.11111	0.666667			n	0	60	40	4.5	4.5	970	970	towedcam	HD	NZ	Ghoul	58	84	Clark_etal_2019	M Clark
954	Image 20	0	0	0	0	0.629921	0	5.03937	0	0	0	0	0	0	0	0	0	0	0	0	0	0	2	5.66929	0.314961			n	3	47	50	6.35	6.35	975	975	towedcam	HD	NZ	Ghoul	58	88	Clark_etal_2019	M Clark
955	Image 21	0	0	0	0	1.58014	2.0316	15.1242	0	0	0.451467	0	0	0	0	0	0	0	0	0	0	0	4	19.1874	0.902935			n	38	3	60	4.43	4.43	1000	1000	towedcam	HD	NZ	Ghoul	58	100	Clark_etal_2019	M Clark
956	Image 22	0	0	0	0	0.681818	1.13636	3.63636	0	0.227273	0	0	0	0.227273	0	0	0	0	0	0	0.227273	0	6	6.13636	1.36364			n	95	0	5	4.4	4.4	1012	1012	towedcam	HD	NZ	Ghoul	58	104	Clark_etal_2019	M Clark
957	Image 23	0	4.81481	0	0	3.7037	0	5.18519	0	0	0	0	0	0	0	1.11111	0	0.37037	0	0	0	0	5	15.1852	1.85185			m	95	5	0	2.7	2.7	1000	1000	towedcam	HD	NZ	Ghoul	59	40	Clark_etal_2019	M Clark
958	Image 24	0	3.4	0	0	1.4	0	29.2	0	0.4	0.4	0	0	0	0	0.6	0	0.2	0	0	0	0	7	35.6	1.4			m	62	10	28	5	5	980	980	towedcam	HD	NZ	Ghoul	59	48	Clark_etal_2019	M Clark
959	Image 25	0	0	0	0	0	0	0	0	0	0	0	0	0	0	0.763359	0	0	0	0	0	0	1	0.763359	0.381679			n	0	0	100	2.62	2.62	970	970	towedcam	HD	NZ	Ghoul	59	68	Clark_etal_2019	M Clark
960	Image 26	0	0	0	0	0	0.49505	0	0	0.49505	0	0	0	0	0	0	0	0	0	0	0	0	2	0.990099	0.990099			n	0	0.5	99.5	2.02	2.02	960	960	towedcam	HD	NZ	Ghoul	59	72	Clark_etal_2019	M Clark
961	Image 27	0	0	0	0	0	0	0	0	0.666667	0	0	0	0	0	0	0	0	0	0	0	0	1	0.666667	0.166667			n	0	0	100	6	6	955	955	towedcam	HD	NZ	Ghoul	59	76	Clark_etal_2019	M Clark
962	Image 28	0	0	0	0	0	1.66667	0.833333	0	0	1.66667	0	0	0	0	0	0	0	0	0	0	0	3	4.16667	2.5			m	0	100	0	1.2	1.2	940	940	towedcam	HD	NZ	Ghoul	59	104	Clark_etal_2019	M Clark
963	Image 29	0	9.42857	0	0	0.571429	0	0.285714	0	0	3.71429	0	0	0	0	0	0	0.142857	0	0	0	0	5	14.1429	0.714286			y	90	6	4	7	7	930	930	towedcam	HD	NZ	Ghoul	59	108	Clark_etal_2019	M Clark
964	Image 30	0	0.666667	0	0	1.55556	0.222222	0	0	0	9.33333	0	0	0	0	0	0	0.222222	0	0	0	0	5	12	1.11111			y	76	18	5	4.5	4.5	930	930	towedcam	HD	NZ	Ghoul	59	116	Clark_etal_2019	M Clark
965	Image 31	0	2.75	0	0	2.25	0	0.25	0	0	12.5	0	0	0	0	1.25	0	0.25	0	0	0	0	6	19.25	1.5			y	100	0	0	4	4	935	935	towedcam	HD	NZ	Ghoul	59	120	Clark_etal_2019	M Clark
966	Image 32	0	0	0	0	0.669643	0.223214	5.13393	0	0	0.223214	0	0	0	0	0	0	0	0	0	0	0	4	6.25	0.892857			n	3	57	40	4.48	4.48	950	950	towedcam	HD	NZ	Ghoul	59	132	Clark_etal_2019	M Clark
967	Image 33	0	0	0	0	2.84091	0	17.803	0	0	1.32576	0	0	0	0	0	0	0.189394	0	0	0	0	4	22.1591	0.757576			m	36	44	20	5.28	5.28	955	955	towedcam	HD	NZ	Ghoul	59	140	Clark_etal_2019	M Clark
968	Image 34	0	0	0	0	1.875	0.375	4.375	0	0	0	0	0	0	0	0	0	0.25	0	0	0	0	4	6.875	0.5			n	87	2	11	8	8	970	970	towedcam	HD	NZ	Ghoul	59	156	Clark_etal_2019	M Clark
969	Image 35	0	0	0	0	2.25225	1.12613	3.82883	0	0.225225	0	0	0	0	0	0	0	0	0	0	0	0	4	7.43243	0.900901			n	78	1	21	4.44	4.44	1000	1000	towedcam	HD	NZ	Ghoul	59	160	Clark_etal_2019	M Clark
970	Image 36	0	0	0	0	2.28571	4.57143	0	0	0	0	0	0	0	0	0	0	0	0	0	0	0	2	6.85714	1.14286			n	83	1	16	1.75	1.75	1010	1010	towedcam	HD	NZ	Ghoul	59	164	Clark_etal_2019	M Clark
971	Image 37	0	1.08225	0	0	0.21645	0	0	0	0.21645	0	0	0	0	0	0	0	0	0	0	0	0	3	1.51515	0.649351			n	0	0.5	99.5	4.62	4.62	1020	1020	towedcam	HD	NZ	Ghoul	59	172	Clark_etal_2019	M Clark
972	Image 38	0	1.06838	0	0	0	0	0.42735	0	0.213675	0	0	0	0	0	0.213675	0	0	0	0	0	0	4	1.92308	0.854701			n	0.5	0	99.5	4.68	4.68	1022	1022	towedcam	HD	NZ	Ghoul	59	176	Clark_etal_2019	M Clark
973	Image 39	0	0	0	0	1.00143	0	9.87124	0	0.572246	0	0	0	0	0	0.286123	0	0.143062	0	0	0	0	5	11.8741	0.715308			n	17	30	53	6.99	6.99	1000	1000	towedcam	HD	NZ	Ghoul	74	4	Clark_etal_2019	M Clark
974	Image 40	0	18.3128	0	0	1.44033	0	3.29218	0	0	1.23457	0	0	0	0	0	0	0	0	0	0	0	4	24.2798	0.411523			m	33	50	17	9.72	9.72	990	990	towedcam	HD	NZ	Ghoul	74	8	Clark_etal_2019	M Clark
975	Image 41	0	0.769231	0	0	0.384615	0	3.07692	0	0	6.34615	0.192308	0	0	0	0	0	0.192308	0	0	0	0	6	10.9615	1.15385			y	95	2	3	5.2	5.2	970	970	towedcam	HD	NZ	Ghoul	74	12	Clark_etal_2019	M Clark
976	Image 42	0	5.63166	0	0	0.304414	0	0	0	0	11.4155	0	0	0	0	0	0	0.304414	0	0	0	0	4	17.656	0.608828			y	99	0	1	6.57	6.57	940	940	towedcam	HD	NZ	Ghoul	74	24	Clark_etal_2019	M Clark
977	Image 43	0	0.714286	0	0	1.85714	0	1.85714	0	0.428571	12.5714	0	0	0	0	0	0	0	0	0	0	0	5	17.4286	0.714286			y	50	34	16	7	7	950	950	towedcam	HD	NZ	Ghoul	74	36	Clark_etal_2019	M Clark
978	Image 44	0	0.444444	0	0	1.55556	0	3.55556	0	0.222222	3.11111	0	0	0	0	0.222222	0	0	0	0	0	0	6	9.11111	1.33333			y	45	46	9	4.5	4.5	955	955	towedcam	HD	NZ	Ghoul	74	40	Clark_etal_2019	M Clark
979	Image 45	0	0.166113	0	0	0.166113	0	2.49169	0	0.166113	0	0	0	0	0	0	0	0	0	0	0	0	4	2.99003	0.664452			n	0	85	15	6.02	6.02	960	960	towedcam	HD	NZ	Ghoul	74	44	Clark_etal_2019	M Clark
980	Image 46	0	0	0	0	0.888889	0.666667	8.66667	0	0	0	0	0	0	0	0.222222	0	0	0	0	0	0	4	10.4444	0.888889			n	72	1	27	4.5	4.5	990	990	towedcam	HD	NZ	Ghoul	74	60	Clark_etal_2019	M Clark
981	Image 47	0	0	0	0	0	0.220751	0.883002	0	0	0	0	0	0	0	0	0	0	0	0	0	0	2	1.10375	0.441501			n	18.5	0	81.5	4.53	4.53	1000	1000	towedcam	HD	NZ	Ghoul	74	64	Clark_etal_2019	M Clark
982	Image 48	0	0	0	0	0	0.128205	0	0	0	0	0	0	0	0	0	0	0	0	0	0	0	1	0.128205	0.128205			n	1	0	99	7.8	7.8	1010	1010	towedcam	HD	NZ	Ghoul	74	68	Clark_etal_2019	M Clark
983	Image 49	0	1.30719	0	0	0	0	0	0	0	0	0	0	0	0	0	0	0	0	0	0	0	1	1.30719	0.653595			n	0	0	100	1.53	1.53	1020	1020	towedcam	HD	NZ	Ghoul	74	72	Clark_etal_2019	M Clark
984	Image 50	0	0	0	0	3.83693	0	31.6547	0	1.19904	0	0	0	0	0	0	0	0.239808	0	0	0	0	4	36.9305	0.959233			n	96	0	4	4.17	4.17	1020	1020	towedcam	HD	NZ	Ghoul	74	80	Clark_etal_2019	M Clark
985	Image 1	0	0	0	0	0.615385	0.461538	1.38462	0	0.153846	4.76923	0	0	0	0	0	0	0	0	0	0	0.153846	6	7.53846	0.923077			y	100	0	0	6.5	6.5	1010	1010	towedcam	HD	NZ	Gothic	28	16	Clark_etal_2019	M Clark
986	Image 2	0	0	0	0	1.83486	0	1.83486	0	1.83486	1.83486	0	0	0	0	0.917431	0	0	0	0	0	0	5	8.25688	4.58716			n	2	36	36	1.09	1.09	1020	1020	towedcam	HD	NZ	Gothic	28	60	Clark_etal_2019	M Clark
987	Image 3	0	0	0	0	2.49042	0	5.36398	0	0	0.574713	0.191571	0	0	0	0	0	0.191571	0	0	0	0	5	8.81226	0.957854			m	40	23	37	5.22	5.22	1035	1035	towedcam	HD	NZ	Gothic	28	84	Clark_etal_2019	M Clark
988	Image 4	0	0	0	0	2.52294	0	17.6606	0	0	0	0.458716	0	0	0	0	0	0.458716	0	0	0	0	4	21.1009	0.917431			m	19	35	47	4.36	4.36	1050	1050	towedcam	HD	NZ	Gothic	28	92	Clark_etal_2019	M Clark
989	Image 5	0	0	0	0	1.81818	0.519481	21.8182	0	0	0	0	0	0	0	0.25974	0	0	0	0	0	0	4	24.4156	1.03896			n	18	48	29	3.85	3.85	1075	1075	towedcam	HD	NZ	Gothic	28	104	Clark_etal_2019	M Clark
990	Image 6	0	0	0	0	0.507614	0	3.80711	0	0	0	0	0	0	0	0	0	0.507614	0	0	0	0	3	4.82234	0.761421			n	7	42	51	3.94	3.94	1100	1100	towedcam	HD	NZ	Gothic	28	112	Clark_etal_2019	M Clark
991	Image 7	0	0	0	0	0.829187	0	9.45274	0	0	0	0.165837	0	0	0	0	0	0	0	0	0.331675	0	4	10.7794	0.66335			m	63	11	26	6.03	6.03	1100	1100	towedcam	HD	NZ	Gothic	28	128	Clark_etal_2019	M Clark
992	Image 8	0	0	0	0	3.5	0	3	0	0	6.33333	0.166667	0	0	0	0	0	0.166667	0	0	0	0	5	13.1667	0.833333			y	82	5	13	6	6	1020	1020	towedcam	HD	NZ	Gothic	29	4	Clark_etal_2019	M Clark
993	Image 9	0	0	0	0	1.08225	0	2.38095	0	0.649351	3.24675	0	0	0	0	0	0	0.21645	0	0	0	0	5	7.57576	1.08225			y	100	0	0	4.62	4.62	1025	1025	towedcam	HD	NZ	Gothic	29	36	Clark_etal_2019	M Clark
994	Image 10	0	0	0	0	0.636943	0	25.4777	0	1.27389	1.91083	0	0	0	0	0	0	0.636943	0	0	0	0	5	29.9363	3.18471			n	13	55	32	1.57	1.57	1030	1030	towedcam	HD	NZ	Gothic	29	44	Clark_etal_2019	M Clark
995	Image 11	0	0	0	0	3.9604	0.330033	28.7129	0	0	3.30033	0	0	0	0	0	0	0.990099	0	0	0	0	5	37.2937	1.65017			m	57	19	24	3.03	3.03	1030	1030	towedcam	HD	NZ	Gothic	29	60	Clark_etal_2019	M Clark
996	Image 12	0	0	0	0	0.701754	0	24.2105	0	0	0	0	0	0	0	0	0	0.175439	0	0	0.175439	0	4	25.2632	0.701754			n	48	32	20	5.7	5.7	1050	1050	towedcam	HD	NZ	Gothic	29	72	Clark_etal_2019	M Clark
997	Image 13	0	0	0	0	7.56303	0	60.5042	0	0	6.72269	0	0	0	0	0	1.68067	2.52101	0	0	0	0	5	78.9916	4.20168			m	63	19	18	1.19	1.19	1050	1050	towedcam	HD	NZ	Gothic	29	88	Clark_etal_2019	M Clark
998	Image 14	0	0	0	0	0	0	0.607903	0	0.303951	0.303951	0	0	0	0	5.77508	0	0.607903	0	0	0	0	5	7.59878	1.51976			n	2	20	75	3.29	3.29	1075	1075	towedcam	HD	NZ	Gothic	29	96	Clark_etal_2019	M Clark
999	Image 15	0	0.153846	0	0	0.307692	0.769231	9.84615	0	0	0	0	0	0	0	0.153846	0	0.615385	0	0	0	0	6	11.8462	0.923077			n	66	4	30	6.5	6.5	1100	1100	towedcam	HD	NZ	Gothic	29	128	Clark_etal_2019	M Clark
1000	Image 16	0	0	0	0	2.25989	0.564972	4.89642	0	0	0.753296	0.188324	0	0	0	0	0	2.25989	0	0	0	0	6	10.9228	1.12994			m	41	8	51	5.31	5.31	1120	1120	towedcam	HD	NZ	Gothic	29	160	Clark_etal_2019	M Clark
1001	Image 17	0	0	0	0	6.45161	1.6129	101.613	0	0	2.41935	0.806452	0	0	0	0	0.806452	2.41935	0	0	0	0	7	116.129	5.64516			m	36	28	36	1.24	1.24	1150	1150	towedcam	HD	NZ	Gothic	29	172	Clark_etal_2019	M Clark
1002	Image 18	0	0	0	0	1.25	0	0	0	0	10.8333	0	0	0	0	0	0	0	0	0	0	0.416667	3	12.5	1.25			y	100	0	0	2.4	2.4	1025	1025	towedcam	HD	NZ	Gothic	49	34	Clark_etal_2019	M Clark
1003	Image 19	0	0	0	0	0.993377	0	18.543	0	0.331126	0	0	0	0	0	0	0	0	0	0	0	0	3	19.8675	0.993377			n	8	52	40	3.02	3.02	1030	1030	towedcam	HD	NZ	Gothic	49	50	Clark_etal_2019	M Clark
1004	Image 20	0	0	0	0	0	0.497512	0.746269	0	0.248756	0	0	0	0	0	0	0	0	0	0	0	0	3	1.49254	0.746269			n	3	50	27	4.02	4.02	1075	1075	towedcam	HD	NZ	Gothic	50	12	Clark_etal_2019	M Clark
1005	Image 21	0	0	0	0	1.28571	0	4.28571	0	0	0	0.714286	0	0	0	0	0.571429	0.285714	0	0	0	0	5	7.14286	0.714286			y	73	7	20	7	7	1080	1080	towedcam	HD	NZ	Gothic	50	20	Clark_etal_2019	M Clark
1006	Image 22	0	0	0	0	2	0.285714	18.2857	0	0.285714	0	1.14286	0	0	0	0.571429	0	0	0	0	0	0	6	22.5714	1.71429			y	86	2	12	3.5	3.5	1020	1020	towedcam	HD	NZ	Gothic	51	28	Clark_etal_2019	M Clark
1007	Image 23	0	0	0	0	1.29199	0.258398	16.2791	0	0.258398	0	0.516796	0	0	0	0	0	0.775194	0	0	0	0	6	19.3798	1.55039			m	67	11	22	3.87	3.87	1020	1020	towedcam	HD	NZ	Gothic	51	32	Clark_etal_2019	M Clark
1008	Image 24	0	0	0	0	0	0.190114	0.190114	0	0	0	0	0	0	0	0.380228	0	0.190114	0	0	0	0	4	0.95057	0.760456			n	3	22	75	5.26	5.26	1050	1050	towedcam	HD	NZ	Gothic	51	44	Clark_etal_2019	M Clark
1009	Image 25	0	0	0	0	0	0.316456	0	0	0	0	0	0	0	0	0	0	0	0	0	0	0	1	0.316456	0.316456			n	3	3	94	3.16	3.16	1060	1060	towedcam	HD	NZ	Gothic	51	52	Clark_etal_2019	M Clark
1010	Image 26	0	0	0	0	3.57143	0	15.7143	0	0	20	0	0	0	0	0	0.714286	0	0	0	0	0	4	40	2.85714			y	100	0	0	1.4	1.4	1018	1018	towedcam	HD	NZ	Gothic	72	4	Clark_etal_2019	M Clark
1011	Image 27	0	0	0	0	3	1.66667	7.33333	0	0	27.3333	0	0	0	0	0	0.333333	1.66667	0	0	0	0	6	41.3333	2			y	100	0	0	3	3	1025	1025	towedcam	HD	NZ	Gothic	72	24	Clark_etal_2019	M Clark
1012	Image 28	0	0	0	0	0.539084	2.42588	17.2507	0	0	0.269542	0.539084	0	0	0	0	0	0.539084	0	0	0	0	6	21.5633	1.61725			m	46	42	12	3.71	3.71	1040	1040	towedcam	HD	NZ	Gothic	72	44	Clark_etal_2019	M Clark
1013	Image 29	0	0	0	0	6.01504	0.37594	29.3233	0	0	1.8797	0.75188	0	0	0	0.37594	0	0.75188	0	0	0	0	7	39.4737	2.63158			n	53	16	26	2.66	2.66	1060	1060	towedcam	HD	NZ	Gothic	72	68	Clark_etal_2019	M Clark
1014	Image 30	0	0	0	0	0.531915	1.77305	2.48227	0	0	0	0	0	0	0	0	0	0.35461	0	0	0	0	4	5.14184	0.70922			n	38	35	27	5.64	5.64	1100	1100	towedcam	HD	NZ	Gothic	72	96	Clark_etal_2019	M Clark
1015	Image 31	0	0	0	0	1.31752	0	0.658762	0	0	4.08432	0	0	0	0	0	0	0.131752	0	0	0	0	4	6.19236	0.527009			y	100	0	0	7.59	7.59	1025	1025	towedcam	HD	NZ	Gothic	78	12	Clark_etal_2019	M Clark
1016	Image 32	0	0	0	0	0	0	62.7451	0	0	0	0	0	0	0	0	0	0	0	0	0	0	1	62.7451	0.490196			m	33	45	22	2.04	2.04	1030	1030	towedcam	HD	NZ	Gothic	78	24	Clark_etal_2019	M Clark
1017	Image 33	0	0	0	0	1.66667	0	3.80952	0	0	7.38095	0	0	0	0	0	0	0.238095	0	0	0	0	4	13.0952	0.952381			y	100	0	0	4.2	4.2	1010	1010	towedcam	HD	NZ	Gothic	79	4	Clark_etal_2019	M Clark
1018	Image 34	0	0	0	0	0.857143	0.857143	45.1429	0	0	0.857143	0	0	0	0	0	0	0	0	0	0	0	4	47.7143	1.14286			m	85	12	3	3.5	3.5	1015	1015	towedcam	HD	NZ	Gothic	79	20	Clark_etal_2019	M Clark
1019	Image 35	0	0	0	0	3.11111	0	25.7778	0	0.222222	0.444444	0.222222	0	0	0	0.444444	0	1.11111	0	0	0	0	7	31.3333	1.55556			y	51	42	7	4.5	4.5	1020	1020	towedcam	HD	NZ	Gothic	79	28	Clark_etal_2019	M Clark
1020	Image 36	0	0	0	0	0.724638	0	2.17391	0	0.241546	0	0.483092	0	0	0	0	0	0	0	0	0	0	4	3.62319	0.966184			n	5	40	47	4.14	4.14	1040	1040	towedcam	HD	NZ	Gothic	79	36	Clark_etal_2019	M Clark
1021	Image 37	0	0	0	0	0.894855	1.34228	1.11857	0	0.447427	0	0	0	0	0	0	0	0.671141	0	0	0.223714	0	6	4.69799	1.34228			n	55	5	40	4.47	4.47	1075	1075	towedcam	HD	NZ	Gothic	79	68	Clark_etal_2019	M Clark
1022	Image 38	0	0	0	0	1.21359	0.242718	0.485437	0	0	0	0	0	0	0	0	0	4.12621	0	0	0	0	4	6.06796	0.970874			n	44	24	32	4.12	4.12	1120	1120	towedcam	HD	NZ	Gothic	79	116	Clark_etal_2019	M Clark
1023	Image 39	0	0	0	0	4.914	1.4742	24.8157	0	0.4914	0.4914	0.2457	0	0	0	0.4914	0	1.2285	0	0	0	0	8	34.1523	1.9656			n	66	24	10	4.07	4.07	1100	1100	towedcam	HD	NZ	Gothic	89	12	Clark_etal_2019	M Clark
1024	Image 40	0	0	0	0	1.6	0.4	18.8	0	0.2	0.4	0	0	0	0	0	0	0.2	0	0	0	0	6	21.6	1.2			m	90	8	2	5	5	1080	1080	towedcam	HD	NZ	Gothic	89	56	Clark_etal_2019	M Clark
1025	Image 41	0	0	0	0	1.32743	0	26.1062	0	0.442478	0.442478	0.442478	0	0	0	0	0	0.884956	0	0	0	0	6	29.646	1.32743			m	35	41	24	4.52	4.52	1070	1070	towedcam	HD	NZ	Gothic	89	60	Clark_etal_2019	M Clark
1026	Image 42	0	0	0	0	1.67598	0.27933	13.9665	0	0.27933	0	0	0	0	0	0	0	1.67598	0	0	0.27933	0	6	18.1564	1.67598			y	61	21	18	3.58	3.58	1060	1060	towedcam	HD	NZ	Gothic	89	76	Clark_etal_2019	M Clark
1027	Image 43	0	0	0	0	1.65441	0	4.04412	0	0	1.10294	0	0	0	0	0	0	0	0	0	0	0	3	6.80147	0.551471			y	78	8	14	5.44	5.44	1055	1055	towedcam	HD	NZ	Gothic	89	100	Clark_etal_2019	M Clark
1028	Image 44	0	0	0	0	1.02941	1.32353	8.23529	0	0	6.76471	0	0	0	0	0	0.147059	0.588235	0	0	0	0	6	18.0882	0.882353			m	55	23	22	6.8	6.8	1050	1050	towedcam	HD	NZ	Gothic	89	132	Clark_etal_2019	M Clark
1029	Image 45	0	0	0	0	1.2	0	24.9333	0	0.133333	0	0	0	0	0	0	0	0.666667	0	0	0	0	4	26.9333	0.533333			m	25	55	20	7.5	7.5	1095	1095	towedcam	HD	NZ	Gothic	90	16	Clark_etal_2019	M Clark
1030	Image 46	0	0	0	0	0.561798	0	32.0225	0	0	0.11236	0	0	0	0	0	0	0.561798	0	0	0	0	4	33.2584	0.449438			m	28	40	32	8.9	8.9	1070	1070	towedcam	HD	NZ	Gothic	90	24	Clark_etal_2019	M Clark
1031	Image 47	0	0	0	0	0.235294	0.235294	27.5294	0	0	0	0	0	0	0	0	0	0	0	0	0	0	3	28	0.705882			n	6	57	37	4.25	4.25	1060	1060	towedcam	HD	NZ	Gothic	90	44	Clark_etal_2019	M Clark
1032	Image 48	0	0	0	0	2.07792	0	14.8052	0	0	0.779221	0	0	0	0	0	0	0.25974	0	0	0	0	4	17.9221	1.03896			m	22	58	20	3.85	3.85	1040	1040	towedcam	HD	NZ	Gothic	90	64	Clark_etal_2019	M Clark
1033	Image 49	0	0	0	0	0	0	18.75	0	0	0.390625	0	0	0	0	0	0	0.78125	0	0	0	0	3	19.9219	1.17188			m	63	34	3	2.56	2.56	1030	1030	towedcam	HD	NZ	Gothic	90	76	Clark_etal_2019	M Clark
1034	Image 50	0	0.21322	0	0	0.852878	0	28.3582	0	0	0	0	0	0	0	0	0	0	0	0	0	0	3	29.4243	0.639659			m	33	62	5	4.69	4.69	1030	1030	towedcam	HD	NZ	Gothic	90	80	Clark_etal_2019	M Clark
1035	Image 15	0	0	0	0	0	0	0	0	0	0	0	0	0	0	0	0.0673798	0	0	0	0	0	1	0.0673798	0.0673798		Count	N	20	0	80	14.8412	14.8412	342.861	342.861	AUV	HD	NP	FFS	S358-12	sentry.20151031.034852632894.7208.tif		Beatriz
1036	Image 9	0	0	0	0	0	0	0	0	0	0	0	0	0	0	0	0	0	0	0	0	0.105281	1	0.105281	0.105281		Count	N	70	0	30	9.4984	9.4984	340.488	340.488	AUV	HD	NP	FFS	S358-12	sentry.20151031.035132630322.7256.tif		Beatriz
1037	Image 29	0	0	0	0.105281	0	0	0.210562	0	0	0	0	0	0	0	0	0	0	0	0	0	0	2	0.315843	0.210562		Count	N	90	0	10	9.4984	9.4984	340.422	340.422	AUV	HD	NP	FFS	S359-10	sentry.20151101.080959088828.5813.tif		Beatriz
1038	Image 34	0	0	0	0	0	0.210562	0	0	0	0	0	0	0	0	0	0	0	0	0	0	0	1	0.210562	0.105281		Count	N	90	0	10	9.4984	9.4984	341.206	341.206	AUV	HD	NP	FFS	S359-10	sentry.20151101.081252422146.5865.tif		Beatriz
1039	Image 37	0	0	0.210562	0	0	0	0	0	0	0	0	0	0	0	0	0	0	0	0	0	0	1	0.210562	0.105281		Count	N	95	0	5	9.4984	9.4984	341.149	341.149	AUV	HD	NP	FFS	S359-10	sentry.20151101.081339088809.5879.tif		Beatriz
1040	Image 19	0	0	0.105281	0	0	0	0	0	0	0	0	0	0	0	0	0	0	0	0	0	0	1	0.105281	0.105281		Count	N	85	0	15	9.4984	9.4984	339.762	339.762	AUV	HD	NP	FFS	S359-10	sentry.20151101.082212422097.6033.tif		Beatriz
1041	Image 18	0	0	0	0	0	0.105281	0	0	0	0	0	0	0	0	0	0	0	0	0	0	0	1	0.105281	0.105281		Count	N	90	0	10	9.4984	9.4984	340.764	340.764	AUV	HD	NP	FFS	S359-10	sentry.20151101.082432422085.6075.tif		Beatriz
1042	Image 6	0	0.105281	0	0	0	0	0	0	0	0	0	0	0	0	0	0	0	0	0	0	0	1	0.105281	0.105281		Count	N	90	0	10	9.4984	9.4984	339.975	339.975	AUV	HD	NP	FFS	S359-10	sentry.20151101.083319088705.6233.tif		Beatriz
1043	Image 43	0	0.105281	0	0	0	0	0	0	0	0	0	0	0	0	0	0	0	0	0	0	0	1	0.105281	0.105281		Count	N	95	0	5	9.4984	9.4984	340.373	340.373	AUV	HD	NP	FFS	S359-11	sentry.20151101.083645755354.6295.tif		Beatriz
1044	Image 45	0	0	0.105281	0	0	0	0.105281	0	0	0	0	0	0	0	0	0	0	0	0	0	0	2	0.210562	0.210562		Count	N	95	0	5	9.4984	9.4984	339.014	339.014	AUV	HD	NP	FFS	S359-11	sentry.20151101.084005755336.6355.tif		Beatriz
1045	Image 8	0	0	0.105281	0	0	0	0	0	0	0	0	0	0	0	0	0.105281	0	0	0	0	0	2	0.210562	0.210562		Count	N	95	0	5	9.4984	9.4984	339.549	339.549	AUV	HD	NP	FFS	S359-11	sentry.20151101.084119088663.6377.tif		Beatriz
1046	Image 50	0	0	0.105281	0	0	0	0	0	0	0	0	0	0	0	0	0	0	0	0	0	0	1	0.105281	0.105281		Count	N	90	0	10	9.4984	9.4984	339.807	339.807	AUV	HD	NP	FFS	S359-11	sentry.20151101.084419088647.6431.tif		Beatriz
1047	Image 44	0	0	0.105281	0	0	0	0	0	0	0	0	0	0	0	0	0	0	0	0	0	0	1	0.105281	0.105281		Count	N	90	0	10	9.4984	9.4984	339.504	339.504	AUV	HD	NP	FFS	S359-11	sentry.20151101.084439088645.6437.tif		Beatriz
1048	Image 31	0	0	0.0852775	0	0	0	0.0852775	0	0	0	0	0	0	0	0	0	0	0	0	0	0	2	0.170555	0.170555		Count	N	95	0	5	11.7264	11.7264	339.804	339.804	AUV	HD	NP	FFS	S359-11	sentry.20151101.084519088642.6449.tif		Beatriz
1049	Image 7	0	0	0.210562	0.105281	0	0	0	0	0	0	0	0	0	0	0	0	0	0	0	0	0	2	0.315843	0.210562		Count	N	90	0	10	9.4984	9.4984	340.862	340.862	AUV	HD	NP	FFS	S359-12	sentry.20151101.090409075070.6788.tif		Beatriz
1050	Image 35	0.105281	0	0.105281	0	0.105281	0	0	0	0	0	0	0	0	0	0	0.105281	0	0	0	0	0	4	0.421124	0.421124		Count	N	90	0	10	9.4984	9.4984	340.158	340.158	AUV	HD	NP	FFS	S359-12	sentry.20151101.090809071305.6860.tif		Beatriz
1051	Image 42	0	0.105281	0.105281	0	0	0	0	0	0	0	0	0	0	0	0	0	0	0	0	0	0	2	0.210562	0.210562		Count	N	90	0	10	9.4984	9.4984	340.123	340.123	AUV	HD	NP	FFS	S359-12	sentry.20151101.090909070329.6878.tif		Beatriz
1052	Image 21	0	0	0.105281	0	0	0	0	0	0	0	0	0	0	0	0	0	0	0	0	0	0	1	0.105281	0.105281		Count	N	95	0	5	9.4984	9.4984	342.117	342.117	AUV	HD	NP	FFS	S359-12	sentry.20151101.091535730911.6994.tif		Beatriz
1053	Image 4	0	0	0.105281	0	0	0	0	0	0	0	0	0	0	0	0	0	0	0	0	0	0	1	0.105281	0.105281		Count	N	90	0	10	9.4984	9.4984	341.607	341.607	AUV	HD	NP	FFS	S359-12	sentry.20151101.091729062332.7028.tif		Beatriz
1054	Image 32	0	0	0.105281	0	0	0	0.105281	0	0	0	0	0	0	0	0	0	0	0	0	0	0	2	0.210562	0.210562		Count	N	98	0	2	9.4984	9.4984	341.56	341.56	AUV	HD	NP	FFS	S359-12	sentry.20151101.091735728998.7030.tif		Beatriz
1055	Image 24	0	0	0.34111	0	0	0	0	0	0	0	0	0	0	0	0	0	0	0	0	0	0	1	0.34111	0.0852775		Count	M	95	0	5	11.7264	11.7264	341.202	341.202	AUV	HD	NP	FFS	S359-12	sentry.20151101.091842394597.7050.tif		Beatriz
1056	Image 2	0	0	0.0852775	0	0	0	0	0	0	0	0	0	0	0	0	0.170555	0	0	0	0	0	2	0.255833	0.170555		Count	N	95	0	5	11.7264	11.7264	339.592	339.592	AUV	HD	NP	FFS	S359-12	sentry.20151101.092209057955.7112.tif		Beatriz
1057	Image 48	0	0.210562	0	0	0	0	0	0	0	0	0	0	0	0	0	0	0	0	0	0	0	1	0.210562	0.105281		Count	N	90	0	10	9.4984	9.4984	440.62	440.62	AUV	HD	NP	FFS	S359-16	sentry.20151101.112235612136.9280.tif		Beatriz
1058	Image 13	0	0.255833	0	0	0	0	0	0	0	0	0	0	0	0	0	0	0	0	0	0	0	1	0.255833	0.0852775		Count	M	95	0	5	11.7264	11.7264	440.654	440.654	AUV	HD	NP	FFS	S359-16	sentry.20151101.112542275934.9336.tif		Beatriz
1059	Image 12	0.105281	0.105281	0	0	0	0	0	0	0	0	0	0	0	0	0.105281	0	0	0	0	0	0	3	0.315843	0.315843		Count	N	95	0	5	9.4984	9.4984	440.053	440.053	AUV	HD	NP	FFS	S359-16	sentry.20151101.112808940276.9380.tif		Beatriz
1060	Image 38	0.12739	0.25478	0	0	0	0	0.12739	0	0	0	0	0	0	0	0	0	0	0	0	0	0	3	0.50956	0.38217		Count	N	95	0	5	7.84992	7.84992	439.056	439.056	AUV	HD	NP	FFS	S359-16	sentry.20151101.113028938138.9422.tif		Beatriz
1061	Image 14	0	0.0852775	0	0	0.0852775	0	0	0	0	0	0	0	0	0	0	0	0	0	0	0	0	2	0.170555	0.170555		Count	N	95	0	5	11.7264	11.7264	440.521	440.521	AUV	HD	NP	FFS	S359-16	sentry.20151101.113502267343.9504.tif		Beatriz
1062	Image 20	0.0852775	0	0	0	0	0	0	0	0	0	0	0	0	0	0	0	0	0	0	0	0	1	0.0852775	0.0852775		Count	N	95	0	5	11.7264	11.7264	441.116	441.116	AUV	HD	NP	FFS	S359-16	sentry.20151101.113528933554.9512.tif		Beatriz
1063	Image 40	0	0.170555	0	0	0.0852775	0	0	0	0	0	0	0	0	0	0	0	0	0	0	0	0	2	0.255833	0.170555		Count	N	90	0	10	11.7264	11.7264	431.431	431.431	AUV	HD	NP	FFS	S359-16	sentry.20151101.113822264309.9564.tif		Beatriz
1064	Image 41	0.0852775	0.0852775	0	0	0	0	0	0	0	0	0	0	0	0	0	0	0	0	0	0	0	2	0.170555	0.170555		Count	N	90	0	10	11.7264	11.7264	432.062	432.062	AUV	HD	NP	FFS	S359-16	sentry.20151101.113948929620.9590.tif		Beatriz
1065	Image 16	0	0.105281	0	0	0.210562	0	0	0	0	0	0	0	0	0	0	0	0	0	0	0	0	2	0.315843	0.210562		Count	N	85	0	15	9.4984	9.4984	432.016	432.016	AUV	HD	NP	FFS	S359-16	sentry.20151101.114008929319.9596.tif		Beatriz
1066	Image 27	0	0.105281	0	0	0.105281	0	0	0	0	0	0	0	0	0	0	0	0	0	0	0	0	2	0.210562	0.210562		Count	N	80	0	20	9.4984	9.4984	433.741	433.741	AUV	HD	NP	FFS	S359-16	sentry.20151101.114348925974.9662.tif		Beatriz
1067	Image 3	0	0	0.0852775	0	0	0	0	0	0	0	0	0	0	0	0	0	0	0	0	0	0	1	0.0852775	0.0852775		Count	N	50	0	50	11.7264	11.7264	485.123	485.123	AUV	HD	NP	FFS	S359-19	sentry.20151101.130628852885.11150.tif		Beatriz
1068	Image 11	0.0673798	0.0673798	0.0673798	0	0	0	0	0	0	0	0	0	0	0	0	0	0	0	0	0	0	3	0.202139	0.202139		Count	M	60	0	40	14.8412	14.8412	480.963	480.963	AUV	HD	NP	FFS	S359-19	sentry.20151101.130715518977.11164.tif		Beatriz
1069	Image 25	0	0.152131	0	0	0.0760654	0	0	0	0	0	0	0	0	0	0	0	0	0	0	0	0	2	0.228196	0.152131		Count	M	85	0	15	13.1466	13.1466	476.198	476.198	AUV	HD	NP	FFS	S359-19	sentry.20151101.130755518405.11176.tif		Beatriz
1070	Image 39	0	0.103175	0	0	0	0	0	0	0	0	0	0	0	0	0	0	0	0	0	0	0	1	0.103175	0.0515876		Count	M	10	0	90	19.3845	19.3845	463.607	463.607	AUV	HD	NP	FFS	S359-19	sentry.20151101.131155514961.11248.tif		Beatriz
1071	Image 36	0	0.0852775	0	0	0	0	0.0852775	0	0	0	0	0	0	0	0	0	0	0	0	0	0	2	0.170555	0.170555		Count	N	70	0	30	11.7264	11.7264	479.955	479.955	AUV	HD	NP	FFS	S359-19	sentry.20151101.132828833948.11546.tif		Beatriz
1072	Image 17	0	0.170555	0.0852775	0	0	0	0.0852775	0	0	0	0	0	0	0	0	0	0	0	0	0	0	3	0.34111	0.255833		Count	N	90	0	10	11.7264	11.7264	442.546	442.546	AUV	HD	NP	FFS	S359-20	sentry.20151101.134932149105.11924.tif		Beatriz
1073	Image 28	0	0	0.170555	0	0	0	0	0	0	0	0	0	0	0	0	0	0	0	0	0	0	1	0.170555	0.0852775		Count	M	70	0	30	11.7264	11.7264	439.383	439.383	AUV	HD	NP	FFS	S359-20	sentry.20151101.135805475024.12078.tif		Beatriz
1074	Image 30	0	0.170555	0	0	0.0852775	0	0	0	0	0	0	0	0	0	0	0	0	0	0	0	0	2	0.255833	0.170555		Count	M	80	0	20	11.7264	11.7264	438.61	438.61	AUV	HD	NP	FFS	S359-20	sentry.20151101.135832141259.12086.tif		Beatriz
1075	Image 22	0	0	0	0	0.0852775	0	0	0	0	0	0	0	0	0	0	0	0	0	0	0	0	1	0.0852775	0.0852775		Count	N	85	0	15	11.7264	11.7264	443.948	443.948	AUV	HD	NP	FFS	S359-20	sentry.20151101.140025472986.12120.tif		Beatriz
1076	Image 33	0	0.105281	0	0	0	0	0.105281	0	0	0	0	0	0	0	0	0	0	0	0	0	0	2	0.210562	0.210562		Count	N	80	0	20	9.4984	9.4984	443.712	443.712	AUV	HD	NP	FFS	S359-20	sentry.20151101.140212138061.12152.tif		Beatriz
1077	Image 1	0.0852775	0.0852775	0	0	0	0	0	0	0	0	0	0	0	0	0	0	0	0	0	0	0	2	0.170555	0.170555		Count	N	80	0	20	11.7264	11.7264	438.791	438.791	AUV	HD	NP	FFS	S359-20	sentry.20151101.140445469204.12198.tif		Beatriz
1078	Image 47	0	0.210562	0	0	0	0	0	0	0	0	0	0	0	0	0	0.105281	0	0	0	0	0	2	0.315843	0.210562		Count	M	90	0	10	9.4984	9.4984	436.458	436.458	AUV	HD	NP	FFS	S359-20	sentry.20151101.140518801957.12208.tif		Beatriz
1079	Image 49	0.0673798	0	0	0.0673798	0	0	0	0	0	0	0	0	0	0	0	0.0673798	0	0	0	0	0	3	0.202139	0.202139		Count	N	90	0	10	14.8412	14.8412	435.952	435.952	AUV	HD	NP	FFS	S359-20	sentry.20151101.140552134849.12218.tif		Beatriz
1080	Image 46	0	0.255833	0	0	0	0	0.170555	0	0	0	0	0	0	0	0	0	0	0	0	0	0	2	0.426388	0.170555		Count	N	80	0	20	11.7264	11.7264	435.337	435.337	AUV	HD	NP	FFS	S359-21	sentry.20151101.141508793365.12385.tif		Beatriz
1081	Image 26	0.13476	0.0673798	0.13476	0	0.0673798	0	0	0	0	0	0	0	0	0	0	0	0	0	0	0	0	4	0.404279	0.269519		Count	M	75	0	25	14.8412	14.8412	433.844	433.844	AUV	HD	NP	FFS	S359-21	sentry.20151101.141628792185.12409.tif		Beatriz
1082	Image 5	0	0.0852775	0	0	0	0.0852775	0	0	0	0	0	0	0	0	0	0	0	0	0	0	0	2	0.170555	0.170555		Count	N	50	0	50	11.7264	11.7264	435.01	435.01	AUV	HD	NP	FFS	S359-21	sentry.20151101.142508784530.12565.tif		Beatriz
1083	Image 10	0	0	0.0852775	0	0	0	0	0	0	0	0	0	0	0	0	0	0	0	0	0	0	1	0.0852775	0.0852775		Count	N	40	0	60	11.7264	11.7264	433.679	433.679	AUV	HD	NP	FFS	S359-21	sentry.20151101.143122110525.12677.tif		Beatriz
1084	Image 23	0.0852775	0	0	0	0	0	0	0	0	0	0	0	0	0	0	0	0	0	0	0	0	1	0.0852775	0.0852775		Count	N	40	0	60	11.7264	11.7264	433.523	433.523	AUV	HD	NP	FFS	S359-21	sentry.20151101.143215443853.12693.tif		Beatriz
1085	Image 7	0	0	0	0	0	0	0	0	0	0	0	0	0	0	0	0.210562	0	0	0	0	0	1	0.210562	0.105281		Count	N	60	0	40	9.4984	9.4984	590.302	590.302	AUV	HD	NP	Pioneer Bank	S288-03	sentry.20141206.032932654077.1131.tif		Beatriz
1086	Image 18	0	0	0	0	0	0	0	0	0	0	0	0	0	0	0	0.0852775	0	0	0	0	0	1	0.0852775	0.0852775		Count	N	20	0	80	11.7264	11.7264	592.9	592.9	AUV	HD	NP	Pioneer Bank	S288-03	sentry.20141206.034359313992.1391.tif		Beatriz
1087	Image 42	0.0852775	0	0	0	0	0	0	0	0	0	0	0	0	0	0	0	0	0	0	0	0	1	0.0852775	0.0852775		Count	N	0	5	95	11.7264	11.7264	437.454	437.454	AUV	HD	NP	Pioneer Bank	S288-15	sentry.20141206.100225811663.8203.tif		Beatriz
1088	Image 43	0.0852775	0	0.0852775	0	0	0	0	0	0	0	0	0	0	0	0	0	0	0	0	0	0.0852775	3	0.255833	0.255833		Count	M	95	0	5	11.7264	11.7264	426.12	426.12	AUV	HD	NP	Pioneer Bank	S288-15	sentry.20141206.100932475115.8331.tif		Beatriz
1089	Image 40	0	0	0.13476	0.0673798	0	0	0	0	0	0	0	0	0	0	0	0	0	0	0	0	0	2	0.202139	0.13476		Count	N	95	0	5	14.8412	14.8412	427.322	427.322	AUV	HD	NP	Pioneer Bank	S288-15	sentry.20141206.101105807775.8359.tif		Beatriz
1090	Image 26	0	0	0.0515876	0	0	0	0.103175	0	0	0	0	0	0	0	0	0	0	0	0	0	0	2	0.154763	0.103175		Count	N	95	0	5	19.3845	19.3845	429.502	429.502	AUV	HD	NP	Pioneer Bank	S288-15	sentry.20141206.101152474049.8373.tif		Beatriz
1091	Image 33	0	0	0.170555	0	0	0	0	0	0	0	0	0	0	0	0	0	0	0	0	0	0	1	0.170555	0.0852775		Count	N	80	0	20	11.7264	11.7264	431.344	431.344	AUV	HD	NP	Pioneer Bank	S288-15	sentry.20141206.101252473618.8391.tif		Beatriz
1092	Image 6	0	0.170555	0	0	0	1.44972	0	0	0	0	0	0	0	0	0	0	0	0	0	0	0	2	1.62027	0.170555		Count	M	97	0	3	11.7264	11.7264	420.758	420.758	AUV	HD	NP	Pioneer Bank	S288-16	sentry.20141206.103612463081.8811.tif		Beatriz
1093	Image 21	0	0	0	0	0.152131	0	0	0	0	0	0	0	0	0	0	0	0	0	0	0	0	1	0.152131	0.0760654		Count	N	0	80	20	13.1466	13.1466	327.738	327.738	AUV	HD	NP	Pioneer Bank	S288-20	sentry.20141206.125152400976.11253.tif		Beatriz
1094	Image 15	0.255833	0	0	0	0	0	0	0	0	0	0	0	0	0	0	0	0	0	0	0	0	1	0.255833	0.0852775		Count	N	0	30	70	11.7264	11.7264	339.92	339.92	AUV	HD	NP	Pioneer Bank	S288-21	sentry.20141206.131239057987.11627.tif		Beatriz
1095	Image 32	0	0	0.0515876	0	0	0	0	0	0	0	0	0	0	0	0	0	0	0	0	0	0	1	0.0515876	0.0515876		Count	N	0	80	20	19.3845	19.3845	332.739	332.739	AUV	HD	NP	Pioneer Bank	S288-21	sentry.20141206.132325719516.11821.tif		Beatriz
1096	Image 19	0	0	0	0	0	0	0	0	0	0	0	0	0	0	0	0.0852775	0	0	0	0	0	1	0.0852775	0.0852775		Count	N	0	90	10	11.7264	11.7264	331.696	331.696	AUV	HD	NP	Pioneer Bank	S288-21	sentry.20141206.132412385789.11835.tif		Beatriz
1097	Image 47	0	0.0852775	0	0	0	0	0	0	0	0	0	0	0	0	0	0	0.0852775	0	0.0852775	0	0	3	0.255833	0.255833		Count	N	0	80	20	11.7264	11.7264	339.195	339.195	AUV	HD	NP	Pioneer Bank	S288-22	sentry.20141206.133609046237.12050.tif		Beatriz
1098	Image 17	0.0852775	0	0	0	0	0	0	0	0	0	0	0	0	0	0	0	0	0	0	0	0	1	0.0852775	0.0852775		Count	N	0	75	25	11.7264	11.7264	337.343	337.343	AUV	HD	NP	Pioneer Bank	S288-22	sentry.20141206.135429037928.12380.tif		Beatriz
1099	Image 34	0	0	0	0.257938	0	0	0	0	0	0	0	0	0	0	0	0	0	0	0	0	0	1	0.257938	0.0515876		Count	M	20	0	80	19.3845	19.3845	328.439	328.439	AUV	HD	NP	Pioneer Bank	S289-04	sentry.20141207.123901496546.4470.tif		Beatriz
1100	Image 30	0.13476	0	0	1.07808	0	0	0	0	0	0	0	0	0	0	0	0	0	0	0	0	0	2	1.21284	0.13476		Count	Y	50	0	50	14.8412	14.8412	328.449	328.449	AUV	HD	NP	Pioneer Bank	S289-04	sentry.20141207.123921496393.4476.tif		Beatriz
1101	Image 25	0	0	0	0.13476	0	0.0673798	0	0	0	0	0	0	0	0	0	0	0	0	0	0	0	2	0.202139	0.13476		Count	N	55	5	40	14.8412	14.8412	331.985	331.985	AUV	HD	NP	Pioneer Bank	S289-04	sentry.20141207.124014829310.4492.tif		Beatriz
1102	Image 5	0	0	0	0.202139	0	0	0.13476	0	0	0	0	0	0	0	0	0	0	0	0	0	0	2	0.336899	0.13476		Count	N	75	15	10	14.8412	14.8412	332.354	332.354	AUV	HD	NP	Pioneer Bank	S289-04	sentry.20141207.124921491663.4656.tif		Beatriz
1103	Image 12	0.0673798	0	0	0	0	0	0	0	0	0	0	0	0	0	0	0	0	0	0	0	0	1	0.0673798	0.0673798		Count	N	5	20	75	14.8412	14.8412	434.608	434.608	AUV	HD	NP	Pioneer Bank	S289-10	sentry.20141207.181547968715.10532.tif		Beatriz
1104	Image 16	0	0.0673798	0	0.0673798	0	0.13476	0	0	0	0	0	0	0	0	0	0	0	0	0	0	0	3	0.269519	0.202139		Count	N	90	0	10	14.8412	14.8412	436.05	436.05	AUV	HD	NP	Pioneer Bank	S289-10	sentry.20141207.181614635379.10540.tif		Beatriz
1105	Image 44	0.0673798	0.13476	0	0.0673798	0	0	0	0	0	0	0	0	0	0	0	0	0	0	0	0	0	3	0.269519	0.202139		Count	Y	60	30	10	14.8412	14.8412	459.42	459.42	AUV	HD	NP	Pioneer Bank	S289-10	sentry.20141207.182354635339.10678.tif		Beatriz
1106	Image 50	0	0	0.0673798	0.0673798	0.0673798	0	0	0	0	0	0	0	0	0	0	0	0	0	0	0	0	3	0.202139	0.202139		Count	N	60	5	35	14.8412	14.8412	451.619	451.619	AUV	HD	NP	Pioneer Bank	S289-10	sentry.20141207.182714635321.10738.tif		Beatriz
1107	Image 1	0	0.13476	0	0	0	0	0	0	0	0	0	0	0	0	0	0	0	0	0	0	0	1	0.13476	0.0673798		Count	N	85	5	10	14.8412	14.8412	447.953	447.953	AUV	HD	NP	Pioneer Bank	S289-10	sentry.20141207.183121301966.10812.tif		Beatriz
1108	Image 22	0	0.0673798	0	0	0	0	0	0	0	0	0	0	0	0	0	0	0	0	0	0	0	1	0.0673798	0.0673798		Count	N	0	25	75	14.8412	14.8412	597.043	597.043	AUV	HD	NP	Pioneer Bank	S289-14	sentry.20141207.204351268334.13197.tif		Beatriz
1109	Image 36	0	0.0515876	0	0	0	0	0	0	0	0	0	0	0	0	0	0	0	0	0	0	0	1	0.0515876	0.0515876		Count	N	90	0	10	19.3845	19.3845	331.896	331.896	AUV	HD	NP	Pioneer Bank	S289-16	sentry.20141208.002227829852.17132.tif		Beatriz
1110	Image 23	0	0	0	0.0852775	0	0.0852775	0	0	0	0	0	0	0	0	0	0	0	0	0	0	0	2	0.170555	0.170555		Count	N	80	0	20	11.7264	11.7264	333.83	333.83	AUV	HD	NP	Pioneer Bank	S289-16	sentry.20141208.002327829846.17150.tif		Beatriz
1111	Image 9	0.0673798	0	0	0.13476	0	0	0	0	0	0	0	0	0	0	0	0	0	0	0	0	0	2	0.202139	0.13476		Count	N	40	0	60	14.8412	14.8412	332.493	332.493	AUV	HD	NP	Pioneer Bank	S289-16	sentry.20141208.002354496511.17158.tif		Beatriz
1112	Image 27	0	0.0515876	0.0515876	0	0	0	0	0	0	0	0	0	0	0	0	0	0	0	0	0	0	2	0.103175	0.103175		Count	N	70	10	20	19.3845	19.3845	326.153	326.153	AUV	HD	NP	Pioneer Bank	S289-16	sentry.20141208.002727829825.17222.tif		Beatriz
1113	Image 24	0	0	0	0.309526	0	0	0	0	0	0	0	0	0	0	0	0	0	0	0	0	0	1	0.309526	0.0515876		Count	M	10	27	65	19.3845	19.3845	319.771	319.771	AUV	HD	NP	Pioneer Bank	S289-16	sentry.20141208.003001163145.17268.tif		Beatriz
1114	Image 3	0	0.13476	0	0.0673798	0	0	0	0	0	0	0	0	0	0	0	0	0	0	0	0	0	2	0.202139	0.13476		Count	N	50	40	10	14.8412	14.8412	319.455	319.455	AUV	HD	NP	Pioneer Bank	S289-16	sentry.20141208.003101163140.17286.tif		Beatriz
1115	Image 48	0	0	0.0515876	0.0515876	0	0	0.0515876	0	0	0	0	0	0	0	0	0	0	0	0	0	0	3	0.154763	0.154763		Count	N	40	30	30	19.3845	19.3845	318.963	318.963	AUV	HD	NP	Pioneer Bank	S289-16	sentry.20141208.003107829806.17288.tif		Beatriz
1116	Image 4	0	0	0	0.0673798	0	0	0	0	0	0	0	0	0	0	0	0	0	0	0	0	0	1	0.0673798	0.0673798		Count	N	70	10	20	14.8412	14.8412	322.172	322.172	AUV	HD	NP	Pioneer Bank	S289-16	sentry.20141208.003341163126.17334.tif		Beatriz
1117	Image 8	0	0	0	0	0	0.0852775	0	0	0	0	0	0	0	0	0	0	0	0	0	0	0	1	0.0852775	0.0852775		Count	N	0	70	30	11.7264	11.7264	328.023	328.023	AUV	HD	NP	Pioneer Bank	S289-16	sentry.20141208.004841159193.17604.tif		Beatriz
1118	Image 46	0	0	0	4.77554	0	0.0852775	0	0	0	0	0	0	0	0	0	0	0	0	0	0	0	2	4.86082	0.170555		Count	Y	48	2	50	11.7264	11.7264	325.939	325.939	AUV	HD	NP	Pioneer Bank	S289-16	sentry.20141208.004954491975.17626.tif		Beatriz
1119	Image 10	0	0.105281	0	0	0	0	0	0	0	0	0	0	0	0	0	0.210562	0	0	0	0	0	2	0.315843	0.210562		Count	N	90	0	10	9.4984	9.4984	584.176	584.176	AUV	HD	NP	Pioneer Bank	S289-18	sentry.20141208.055204355000.23065.tif		Beatriz
1120	Image 38	0	0	0.13476	0	0	0	0.0673798	0	0	0	0	0	0	0	0	0.0673798	0	0	0	0	0	3	0.269519	0.202139		Count	M	0	80	20	14.8412	14.8412	588.691	588.691	AUV	HD	NP	Pioneer Bank	S289-18	sentry.20141208.060517682667.23303.tif		Beatriz
1121	Image 11	0	0	0.315843	0	0	0	0	0	0	0	0	0	0	0	0	0	0	0	0	0	0	1	0.315843	0.105281		Count	M	0	80	20	9.4984	9.4984	590.934	590.934	AUV	HD	NP	Pioneer Bank	S289-18	sentry.20141208.060957680649.23387.tif		Beatriz
1122	Image 28	0	0.0515876	0.103175	0	0	0.0515876	0.0515876	0	0	0	0	0	0	0	0	0	0	0	0	0	0	4	0.257938	0.206351		Count	Y	70	0	30	19.3845	19.3845	587.37	587.37	AUV	HD	NP	Pioneer Bank	S289-18	sentry.20141208.061057680227.23405.tif		Beatriz
1123	Image 37	0.105281	0	0	0	0	0	0	0	0	0	0	0	0	0	0	0	0	0	0	0	0	1	0.105281	0.105281		Count	N	80	10	10	9.4984	9.4984	346.981	346.981	AUV	HD	NP	Pioneer Bank	S357-07	sentry.20151027.002320011948.6018.tif		Beatriz
1124	Image 41	0	0	0.315843	0	0	0	0	0	0	0	0	0	0	0	0	0	0	0	0	0	0	1	0.315843	0.105281		Count	M	90	0	10	9.4984	9.4984	344.201	344.201	AUV	HD	NP	Pioneer Bank	S357-18	sentry.20151027.081742914097.14556.tif		Beatriz
1125	Image 31	0	0.105281	0	0	0	0	0	0	0	0	0	0	0	0	0	0	0	0	0	0	0	1	0.105281	0.105281		Count	N	90	0	10	9.4984	9.4984	344.561	344.561	AUV	HD	NP	Pioneer Bank	S357-18	sentry.20151027.081849579670.14576.tif		Beatriz
1126	Image 29	0	0.210562	0	0.210562	0	0.105281	0	0	0	0	0	0	0	0	0	0	0	0	0	0	0	3	0.526404	0.315843		Count	M	70	0	30	9.4984	9.4984	344.098	344.098	AUV	HD	NP	Pioneer Bank	S357-18	sentry.20151027.082342908468.14664.tif		Beatriz
1127	Image 14	0	0.210562	0	0	0	0	0	0	0	0	0	0	0	0	0	0	0	0	0	0	0	1	0.210562	0.105281		Count	N	3	72	25	9.4984	9.4984	340.611	340.611	AUV	HD	NP	Pioneer Bank	S357-18	sentry.20151027.083329565863.14840.tif		Beatriz
1128	Image 35	0	0	0	0.12739	0	0	0	0	0	0	0	0	0	0	0	0	0	0	0	0	0	1	0.12739	0.12739		Count	N	80	0	20	7.84992	7.84992	344.629	344.629	AUV	HD	NP	Pioneer Bank	S357-18	sentry.20151027.084329556362.15020.tif		Beatriz
1129	Image 20	0	0	0	0	0	0	0	0	0	0	0	0	0	0	0	0.12739	0	0	0	0	0	1	0.12739	0.12739		Count	N	60	0	40	7.84992	7.84992	445.549	445.549	AUV	HD	NP	Pioneer Bank	S357-36	sentry.20151027.193155551400.26692.tif		Beatriz
1130	Image 39	0	0.0852775	0	0	0	0	0	0	0	0	0	0	0	0	0	0	0	0	0	0	0	1	0.0852775	0.0852775		Count	N	100	0	0	11.7264	11.7264	417.563	417.563	AUV	HD	NP	Pioneer Bank	S357-36	sentry.20151027.194902201812.27000.tif		Beatriz
1131	Image 49	0	0.0852775	0	0	0	0	0	0	0	0	0	0	0.0852775	0	0	0	0	0	0	0	0	2	0.170555	0.170555		Count	N	90	0	10	11.7264	11.7264	425.327	425.327	AUV	HD	NP	Pioneer Bank	S357-37	sentry.20151027.201012181915.27381.tif		Beatriz
1132	Image 13	0	0	0	0	0.0515876	0.0515876	0	0	0	0	0	0	0	0	0	0	0	0	0	0	0	2	0.103175	0.103175		Count	N	97	0	3	19.3845	19.3845	435.26	435.26	AUV	HD	NP	Pioneer Bank	S357-37	sentry.20151027.201945506351.27553.tif		Beatriz
1133	Image 2	0.0673798	0.0673798	0	0	0	0	0	0	0	0	0	0	0	0	0	0	0	0	0	0	0	2	0.13476	0.13476		Count	N	95	0	5	14.8412	14.8412	438.47	438.47	AUV	HD	NP	Pioneer Bank	S357-37	sentry.20151027.201958839365.27557.tif		Beatriz
1134	Image 45	0	0	0.210562	0	0	0	0	0	0	0	0	0	0	0	0	0	0	0	0	0	0	1	0.210562	0.105281		Count	N	0	10	90	9.4984	9.4984	591.311	591.311	AUV	HD	NP	Pioneer Bank	S357-42	sentry.20151028.001715292562.31828.tif		Beatriz
1135	Image 37	0	0.842247	0	0	0	0	0	0	0	0	0	0	0	0	0	0	0	0	0	0	0	1	0.842247	0.105281		Count	Y	50	30	20	9.4984	9.4984	588.624	588.624	AUV	HD	NP	Bank 11	S286-03	sentry.20141201.104149336081.2609.tif		Beatriz
1136	Image 47	0	0.269519	0	0	0	0	0	0	0	0	0	0	0	0	0	0	0	0	0	0	0	1	0.269519	0.0673798		Count	Y	70	0	30	14.8412	14.8412	589.655	589.655	AUV	HD	NP	Bank 11	S286-03	sentry.20141201.104356001913.2647.tif		Beatriz
1137	Image 46	0	0.404279	0	0	0	0	0	0	0	0	0	0	0	0	0	0	0	0	0	0	0	1	0.404279	0.0673798		Count	Y	10	70	30	14.8412	14.8412	600.411	600.411	AUV	HD	NP	Bank 11	S286-03	sentry.20141201.104622667476.2691.tif		Beatriz
1138	Image 8	0.454813	0.303209	0	0	0	0.454813	0	0	0	0	0	0	0	0	0	0.151604	0	0	0	0	0	4	1.36444	0.606418		Count	Y	100	0	0	6.59611	6.59611	604.312	604.312	AUV	HD	NP	Bank 11	S286-03	sentry.20141201.105822662276.2907.tif		Beatriz
1139	Image 7	0	0.170555	0	0	0	0	0	0	0	0	0	0	0	0	0	0	0	0	0	0	0	1	0.170555	0.0852775		Count	M	60	40	0	11.7264	11.7264	596.198	596.198	AUV	HD	NP	Bank 11	S286-03	sentry.20141201.110542659147.3039.tif		Beatriz
1140	Image 38	0.0852775	0.0852775	0	0	0.0852775	0	0	0	0	0	0	0	0.0852775	0	0	0.34111	0	0	0	0	0.0852775	6	0.767498	0.511665		Count	M	90	0	10	11.7264	11.7264	401.476	401.476	AUV	HD	NP	Bank 11	S286-19	sentry.20141201.192552406905.12038.tif		Beatriz
1141	Image 32	0.170555	0	0	0	0.255833	0	0	0	0	0	0	0	0	0	0	0	0	0	0	0	0	2	0.426388	0.170555		Count	M	80	0	20	11.7264	11.7264	433.273	433.273	AUV	HD	NP	Bank 11	S286-19	sentry.20141201.193145737445.12144.tif		Beatriz
1142	Image 20	0	0.210562	0	0	0	0	0	0	0	0	0	0	0	0	0	0	0	0	0	0	0	1	0.210562	0.105281		Count	N	90	0	10	9.4984	9.4984	364.35	364.35	AUV	HD	NP	Bank 11	S287-11	sentry.20141203.013422282618.6975.tif		Beatriz
1143	Image 39	0	0	0	0.0852775	0	0	0	0	0	0	0	0	0	0	0	0	0	0	0	0	0	1	0.0852775	0.0852775		Count	N	5	0	95	11.7264	11.7264	317.315	317.315	AUV	HD	NP	Bank 11	S287-13	sentry.20141203.024255582283.8209.tif		Beatriz
1144	Image 1	0	0	0	0	0.0852775	0	0	0	0	0	0	0	0	0	0	0	0	0	0.170555	0	0	2	0.255833	0.170555		Count	N	0	25	75	11.7264	11.7264	321.049	321.049	AUV	HD	NP	Bank 11	S287-13	sentry.20141203.024335581949.8221.tif		Beatriz
1145	Image 21	0	0	0	0	0	0	0	0	0	0	0	0	0	0	0	0	0	0	0.170555	0	0	1	0.170555	0.0852775		Count	N	0	50	50	11.7264	11.7264	322.852	322.852	AUV	HD	NP	Bank 11	S287-13	sentry.20141203.024402248447.8229.tif		Beatriz
1146	Image 18	0.842247	0	0	0.105281	0	0	0	0	0	0	0	0	0	0	0	0	0	0	0	0	0	2	0.947528	0.210562		Count	N	0	50	50	9.4984	9.4984	327.907	327.907	AUV	HD	NP	Bank 11	S287-13	sentry.20141203.024608913986.8267.tif		Beatriz
1147	Image 44	0	0.0852775	0.170555	0	0.170555	0	0	0	0	0	0	0	0	0	0	0	0	0	0	0	0	3	0.426388	0.255833		Count	N	60	0	40	11.7264	11.7264	335.611	335.611	AUV	HD	NP	Bank 11	S287-13	sentry.20141203.025542242403.8439.tif		Beatriz
1148	Image 43	0	0	0	0	0.0852775	0	0	0	0	0	0	0	0	0	0	0.255833	0.426388	0	0	0	0	3	0.767498	0.255833		Count	N	0	30	70	11.7264	11.7264	440.485	440.485	AUV	HD	NP	Bank 11	S287-16	sentry.20141203.055305487145.11632.tif		Beatriz
1149	Image 13	0	0	0	0	0	0	0	0	0	0	0	0	0	0	0	0.105281	0.105281	0	0	0	0	2	0.210562	0.210562		Count	N	0	25	75	9.4984	9.4984	437.844	437.844	AUV	HD	NP	Bank 11	S287-16	sentry.20141203.060632147336.11874.tif		Beatriz
1150	Image 2	0	0	0	0	0	0	0	0	0	0	0	0	0	0	0	0.13476	0	0	0	0	0	1	0.13476	0.0673798		Count	N	0	25	75	14.8412	14.8412	432.74	432.74	AUV	HD	NP	Bank 11	S287-18	sentry.20141203.071125449817.13042.tif		Beatriz
1151	Image 11	0	0	0	0	0	0	0	0	0	0	0	0	0	0	0	0.0673798	0	0	0	0	0	1	0.0673798	0.0673798		Count	N		80	20	14.8412	14.8412	591.176	591.176	AUV	HD	NP	Bank 11	S287-29	sentry.20141203.143521915017.21033.tif		Beatriz
1152	Image 5	0	0.0515876	0	0	0	0	0	0	0	0	0	0	0	0	0	0.0515876	0	0	0	0	0	2	0.103175	0.103175		Count	N	90		10	19.3845	19.3845	620.072	620.072	AUV	HD	NP	Bank 11	S287-30	sentry.20141203.151051899512.21672.tif		Beatriz
1153	Image 22	0	0	0	0	0.0673798	0	0	0	0	0	0	0	0	0	0	0	0	0	0	0	0	1	0.0673798	0.0673798		Count	N	0	50	50	14.8412	14.8412	598.297	598.297	AUV	HD	NP	Bank 11	S287-30	sentry.20141203.153118557235.22040.tif		Beatriz
1154	Image 35	0	0	0	0	0.105281	0	0	0	0	0	0	0	0	0	0	0	0	0	0	0	0	1	0.105281	0.105281		Count	N	60	20	20	9.4984	9.4984	581.623	581.623	AUV	HD	NP	Bank 11	S287-30	sentry.20141203.153818554178.22166.tif		Beatriz
1155	Image 30	0	0	0	0	0.255833	0	0	0	0	0	0	0	0	0	0	0.170555	0	0	0	0	0	2	0.426388	0.170555		Count	M	30	40	30	11.7264	11.7264	450.075	450.075	AUV	HD	NP	Bank 11	S355-16	sentry.20151023.041657433887.9830.tif		Beatriz
1156	Image 50	0	0.0673798	0	0	0.336899	0	0	0	0	0	0	0	0	0	0	0.13476	0.0673798	0	0	0	0	4	0.606418	0.269519		Count	Y	90	0	10	14.8412	14.8412	449.697	449.697	AUV	HD	NP	Bank 11	S355-16	sentry.20151023.041710767057.9834.tif		Beatriz
1157	Image 34	0	0	0	0	0.526404	0	0	0	0	0	0	0	0.105281	0	0	0	0	0	0	0	0	2	0.631685	0.210562		Count	Y	80	0	20	9.4984	9.4984	448.609	448.609	AUV	HD	NP	Bank 11	S355-16	sentry.20151023.041744099899.9844.tif		Beatriz
1158	Image 49	0	0	0	0	0.404279	0	0	0	0	0	0	0	0	0	0	0	0	0	0	0	0	1	0.404279	0.0673798		Count	Y	95	0	5	14.8412	14.8412	445.716	445.716	AUV	HD	NP	Bank 11	S355-16	sentry.20151023.041844098935.9862.tif		Beatriz
1159	Image 48	0	0.170555	0.0852775	0	0.34111	0	0	0	0	0	0	0	0	0	0	0	0	0	0	0	0	3	0.596943	0.255833		Count	Y	80	0	20	11.7264	11.7264	447.156	447.156	AUV	HD	NP	Bank 11	S355-16	sentry.20151023.042710757266.10014.tif		Beatriz
1160	Image 42	0	0	0	0	0.170555	0	0	0	0	0	0	0	0	0	0	0	0	0	0	0	0	1	0.170555	0.0852775		Count	M	75	0	25	11.7264	11.7264	453.971	453.971	AUV	HD	NP	Bank 11	S355-16	sentry.20151023.042924088497.10054.tif		Beatriz
1161	Image 10	0	0	0	0	0.0673798	0	0	0	0	0	0	0	0	0	0	0	0	0	0	0	0	1	0.0673798	0.0673798		Count	N	81	0	15	14.8412	14.8412	434.415	434.415	AUV	HD	NP	Bank 11	S355-25	sentry.20151023.114410779453.17206.tif		Beatriz
1162	Image 23	0.315843	0	0	0.105281	0	0	0	0	0	0	0	0	0	0	0	0	0.210562	0	0	0	0	3	0.631685	0.315843		Count	N	30	0	70	9.4984	9.4984	445.566	445.566	AUV	HD	NP	Bank 11	S355-25	sentry.20151023.114810775612.17278.tif		Beatriz
1163	Image 28	0	0.170555	0	0	0.511665	0	0	0	0	0	0	0	0	0	0	0	0.0852775	0	0	0	0	3	0.767498	0.255833		Count	Y	80	0	20	11.7264	11.7264	432.266	432.266	AUV	HD	NP	Bank 11	S355-25	sentry.20151023.114944107496.17306.tif		Beatriz
1164	Image 12	0	0	0	0	0	0	0	0	0	0	0	0	0	0	0	0	0.0673798	0	0	0	0	1	0.0673798	0.0673798		Count	N	40	0	60	14.8412	14.8412	452.673	452.673	AUV	HD	NP	Bank 11	S355-25	sentry.20151023.115717433603.17442.tif		Beatriz
1165	Image 14	0	0	0	0	0	0	0	0	0	0	0	0	0	0	0	0	0.315843	0	0	0	0	1	0.315843	0.105281		Count	N	80	0	20	9.4984	9.4984	474.069	474.069	AUV	HD	NP	Bank 11	S355-30	sentry.20151023.150117257419.20753.tif		Beatriz
1166	Image 15	0	0.0592205	0	0	0.177662	0	0	0	0	0	0	0	0	0	0	0	0	0	0	0	0	2	0.236882	0.118441		Count	M	70	0	30	16.886	16.886	451.803	451.803	AUV	HD	NP	Bank 11	S355-30	sentry.20151023.150350588127.20799.tif		Beatriz
1167	Image 19	0	0.421124	0	0	0.315843	0	0	0	0	0	0	0	0	0	0	0	0	0	0	0	0	2	0.736966	0.210562		Count	Y	90	0	10	9.4984	9.4984	440.463	440.463	AUV	HD	NP	Bank 11	S355-30	sentry.20151023.150830583574.20883.tif		Beatriz
1168	Image 25	0	0.095016	0	0	0	0	0	0	0	0	0	0	0	0	0	0	0	0	0	0	0	1	0.095016	0.095016		Count	N	95	0	5	10.5245	10.5245	437.396	437.396	AUV	HD	NP	Bank 11	S355-30	sentry.20151023.151023915107.20917.tif		Beatriz
1169	Image 3	0	0.0673798	0	0	0.404279	0	0	0	0	0	0	0	0	0	0	0	0.336899	0	0	0	0	3	0.808557	0.202139		Count	Y	90	0	10	14.8412	14.8412	446.238	446.238	AUV	HD	NP	Bank 11	S355-30	sentry.20151023.151830573767.21063.tif		Beatriz
1170	Image 16	0	0.118441	0	0	0.414544	0.0592205	0.0592205	0	0	0	0	0	0	0	0	0	0.0592205	0	0	0	0	5	0.710646	0.296103		Count	Y	90	0	10	16.886	16.886	444.387	444.387	AUV	HD	NP	Bank 11	S355-30	sentry.20151023.152003905656.21091.tif		Beatriz
1171	Image 4	0	0.13476	0	0	0.0673798	0	0	0	0	0	0	0	0	0	0	0	0	0	0	0	0	2	0.202139	0.13476		Count	M	0	30	70	14.8412	14.8412	442.305	442.305	AUV	HD	NP	Bank 11	S355-30	sentry.20151023.152057238178.21107.tif		Beatriz
1172	Image 36	0	1.05281	0	0	0.315843	0	0.105281	0	0	0	0	0	0	0	0	0	0.315843	0	0	0	0	4	1.78978	0.421124		Count	Y	98	0	2	9.4984	9.4984	442.279	442.279	AUV	HD	NP	Bank 11	S355-30	sentry.20151023.152110571166.21111.tif		Beatriz
1173	Image 31	0.631685	0	0	0	0	0	0	0	0	0	0	0	0	0	0	0	0	0	0	0	0	1	0.631685	0.105281		Count	N	98	2	0	9.4984	9.4984	344.294	344.294	AUV	HD	NP	Bank 11	S355-32	sentry.20151023.164433823777.22612.tif		Beatriz
1174	Image 9	0	0	0	0	0.315843	0	0	0	0	0	0	0	0	0	0	0	0	0	0	0	0	1	0.315843	0.105281		Count	N	100	0	0	9.4984	9.4984	346.746	346.746	AUV	HD	NP	Bank 11	S355-32	sentry.20151023.164847153031.22688.tif		Beatriz
1175	Image 24	0.736966	0.210562	0	0	0.315843	0	0.315843	0	0	0	0	0	0	0	0	0	0	0	0	0	0	4	1.57921	0.421124		Count	Y	95	0	5	9.4984	9.4984	347.217	347.217	AUV	HD	NP	Bank 11	S355-32	sentry.20151023.165340481414.22776.tif		Beatriz
1176	Image 17	0.170555	0.255833	0	0	0.255833	0	0.0852775	0	0	0	0	0	0.0852775	0	0	0.0852775	0	0	0	0	0	6	0.938053	0.511665		Count	Y	90	0	10	11.7264	11.7264	337.821	337.821	AUV	HD	NP	Bank 11	S355-32	sentry.20151023.165733810924.22846.tif		Beatriz
1177	Image 33	0.309526	0	0	0	0.103175	0	0.103175	0	0	0	0	0	0	0	0	0.0515876	0	0	0	0	0	4	0.567464	0.206351		Count	M	95	0	5	19.3845	19.3845	330.018	330.018	AUV	HD	NP	Bank 11	S355-37	sentry.20151023.204226904835.26894.tif		Beatriz
1178	Image 26	0.404279	0	0	0	0	0	0	0	0	0	0	0	0	0	0	0	0	0	0.0673798	0	0	2	0.471658	0.13476		Count	N	95	0	5	14.8412	14.8412	347.082	347.082	AUV	HD	NP	Bank 11	S355-37	sentry.20151023.204326903803.26912.tif		Beatriz
1179	Image 6	0.526404	0	0	0	0	0	0	0	0	0	0	0	0	0	0	0	0	0	0	0	0	1	0.526404	0.105281		Count	N	90	10	0	9.4984	9.4984	341.228	341.228	AUV	HD	NP	Bank 11	S355-37	sentry.20151023.204526901757.26948.tif		Beatriz
1180	Image 45	0.255833	0	0	0	0	0	0	0	0	0	0	0	0	0	0	0	0	0	0	0	0	1	0.255833	0.0852775		Count	N	70	0	30	11.7264	11.7264	368.943	368.943	AUV	HD	NP	Bank 11	S355-37	sentry.20151023.210100219205.27228.tif		Beatriz
1181	Image 29	0	0	0	0	0	0.0852775	0.170555	0	0	0	0	0	0	0	0	0	0	0	0	0	0	2	0.255833	0.170555		Count	N	80	0	20	11.7264	11.7264	344.363	344.363	AUV	HD	NP	Bank 11	S355-38	sentry.20151023.211313540013.27448.tif		Beatriz
1182	Image 40	0	0.105281	0	0	0.105281	0	0	0	0	0	0	0	0	0	0	0	0	0	0.105281	0	0	3	0.315843	0.315843		Count	N	40	45	15	9.4984	9.4984	351.882	351.882	AUV	HD	NP	Bank 11	S355-38	sentry.20151023.211853534271.27550.tif		Beatriz
1183	Image 27	0.511665	0	0	0	0	0	0	0	0	0	0	0	0	0	0	0	0	0	0	0	0	1	0.511665	0.0852775		Count	N	75	0	27	11.7264	11.7264	345.735	345.735	AUV	HD	NP	Bank 11	S355-38	sentry.20151023.212020199593.27576.tif		Beatriz
1184	Image 41	0.255833	0.170555	0	0	0	0	0	0	0	0	0	0	0	0	0	0	0	0	0	0	0	2	0.426388	0.170555		Count	N	90	0	10	11.7264	11.7264	344.332	344.332	AUV	HD	NP	Bank 11	S355-38	sentry.20151023.212100198926.27588.tif		Beatriz
1185	Image 20	0	0.421124	0	0	0	0.105281	0	0	0	0	0	0	0	0	0	0	0	0	0	0	0	2	0.526404	0.210562		Count	M	97	3	0	9.4984	9.4984	340.682	340.682	AUV	HD	NP	Kammu	S349-01	sentry.20151012.224343779735.294.tif		Beatriz
1186	Image 8	0	0	0	0	0	0.421124	0	0	0	0	0	0	0	0	0	0	0	0	0	0	0	1	0.421124	0.105281		Count	N	95	0	5	9.4984	9.4984	340.299	340.299	AUV	HD	NP	Kammu	S349-01	sentry.20151012.224657108983.352.tif		Beatriz
1187	Image 16	0.0673798	0	0	0.0673798	0.0673798	0.0673798	0	0	0	0	0	0	0	0	0	0	0	0	0	0	0	4	0.269519	0.269519		Count	M	35	5	60	14.8412	14.8412	336.568	336.568	AUV	HD	NP	Kammu	S349-06	sentry.20151013.011830279360.3080.tif		Beatriz
1188	Image 12	2.31618	0	0	0	0	0	0	0	0	0	0	0	0	0	0	0	0	0	0	0	0	1	2.31618	0.105281		Count	Y	60	0	40	9.4984	9.4984	340.146	340.146	AUV	HD	NP	Kammu	S349-06	sentry.20151013.012243608390.3156.tif		Beatriz
1189	Image 45	0.105281	0	0	0	0	0.105281	0.105281	0	0	0	0	0	0	0	0	0	0.105281	0	0	0	0	4	0.421124	0.421124		Count	N	95	0	5	9.4984	9.4984	339.978	339.978	AUV	HD	NP	Kammu	S349-06	sentry.20151013.013250264549.3338.tif		Beatriz
1190	Image 32	0	0	0	0.210562	0	0	0	0	0	0	0	0	0	0	0	0	0	0	0	0	0	1	0.210562	0.105281		Count	N	60	0	40	9.4984	9.4984	342.747	342.747	AUV	HD	NP	Kammu	S349-08	sentry.20151013.022343545394.4254.tif		Beatriz
1191	Image 29	0	0	0	0.105281	0	0	0	0	0	0	0	0	0	0	0	0	0	0	0	0	0	1	0.105281	0.105281		Count	N	95	0	5	9.4984	9.4984	341.953	341.953	AUV	HD	NP	Kammu	S349-08	sentry.20151013.022610209463.4298.tif		Beatriz
1192	Image 34	0.105281	0	0	0	0	0	0.105281	0	0	0	0	0	0	0	0	0	0	0	0	0	0	2	0.210562	0.210562		Count	N	25	0	75	9.4984	9.4984	339.097	339.097	AUV	HD	NP	Kammu	S349-08	sentry.20151013.023236869411.4414.tif		Beatriz
1193	Image 31	0	0.105281	0	0	0	0	0	0	0	0	0.421124	0	0	0	0	0	0	0	0	0	0	2	0.526404	0.210562		Count	N	40	30	30	9.4984	9.4984	433.795	433.795	AUV	HD	NP	Kammu	S349-13	sentry.20151013.054246673767.7837.tif		Beatriz
1194	Image 10	0	0	0	0	0	0	0	0	0	0	8.73831	0	0	0	0	0	0	0	0	0	0	1	8.73831	0.105281		Count	Y	25	0	75	9.4984	9.4984	435.263	435.263	AUV	HD	NP	Kammu	S349-13	sentry.20151013.054853334405.7947.tif		Beatriz
1195	Image 35	0	0	0	0	0.105281	0	0	0	0	0	0.947528	0	0	0	0	0	0	0	0	0	0	2	1.05281	0.210562		Count	M	80	0	20	9.4984	9.4984	441.551	441.551	AUV	HD	NP	Kammu	S349-13	sentry.20151013.055113332058.7989.tif		Beatriz
1196	Image 21	0	0	0	0	0	0	0	0	0	0	0.12739	0	0	0	0	0	0	0	0	0	0	1	0.12739	0.12739		Count	N	75	0	25	7.84992	7.84992	431.832	431.832	AUV	HD	NP	Kammu	S349-13	sentry.20151013.055433328720.8049.tif		Beatriz
1197	Image 22	0	0	0	0	0.210562	0	0	0	0	0	0	0	0	0	0	0	0	0	0	0	0	1	0.210562	0.105281		Count	N	60	0	40	9.4984	9.4984	430.433	430.433	AUV	HD	NP	Kammu	S349-13	sentry.20151013.055619993556.8081.tif		Beatriz
1198	Image 46	0	0.105281	0	0	0	0	0	0	0	0	0.105281	0	0	0	0	0	0	0	0	0	0	2	0.210562	0.210562		Count	N	70	0	30	9.4984	9.4984	432.411	432.411	AUV	HD	NP	Kammu	S349-14	sentry.20151013.061613307123.8439.tif		Beatriz
1199	Image 36	0	0.210562	0	0	0	0	0	0	0	0	0	0	0	0	0	0	0	0	0	0	0	1	0.210562	0.105281		Count	N	30	0	70	9.4984	9.4984	434.148	434.148	AUV	HD	NP	Kammu	S349-14	sentry.20151013.061846637824.8485.tif		Beatriz
1200	Image 50	0	0.764339	0	0	0	0.38217	0	0	0	0	0	0	0	0	0	0	0	0	0	0	0	2	1.14651	0.25478		Count	Y	98	0	2	7.84992	7.84992	340.972	340.972	AUV	HD	NP	Kammu	S351-01	sentry.20151015.071611428398.249.tif		Beatriz
1201	Image 13	0	0	0	0	0	0	0	0	0	0	0	0	0	0	0	0	0.105281	0	0	0	0	1	0.105281	0.105281		Count	N	95	0	5	9.4984	9.4984	340.077	340.077	AUV	HD	NP	Kammu	S351-01	sentry.20151015.071724759960.271.tif		Beatriz
1202	Image 3	0	0.315843	0	0.105281	0	0.105281	0	0	0	0	0	0	0	0	0	0	0	0	0	0	0	3	0.526404	0.315843		Count	M	90	0	10	9.4984	9.4984	341.319	341.319	AUV	HD	NP	Kammu	S351-01	sentry.20151015.073831400296.651.tif		Beatriz
1203	Image 43	0.210562	0.210562	0	0	0	0	0	0	0	0	0	0	0	0	0	0	0	0	0	0	0	2	0.421124	0.210562		Count	N	95	5	0	9.4984	9.4984	340.746	340.746	AUV	HD	NP	Kammu	S351-03	sentry.20151015.082951343364.1575.tif		Beatriz
1204	Image 40	0	0.210562	0	0.105281	0	0	0	0	0	0	0	0	0	0	0	0	0	0	0	0	0	2	0.315843	0.210562		Count	N	70	0	30	9.4984	9.4984	340.752	340.752	AUV	HD	NP	Kammu	S351-03	sentry.20151015.083151341234.1611.tif		Beatriz
1205	Image 48	0	0	0	0.105281	0	0	0	0	0	0	0	0	0	0	0	0.105281	0	0	0	0	0	2	0.210562	0.210562		Count	N	0	40	60	9.4984	9.4984	341.18	341.18	AUV	HD	NP	Kammu	S351-03	sentry.20151015.083651335927.1701.tif		Beatriz
1206	Image 11	0.421124	0	0	0.105281	0	0	0.105281	0	0	0	0	0	0	0	0	0	0	0	0.210562	0	0	4	0.842247	0.421124		Count	N	90	0	10	9.4984	9.4984	341.214	341.214	AUV	HD	NP	Kammu	S351-03	sentry.20151015.083804667856.1723.tif		Beatriz
1207	Image 5	0.210562	0.210562	0	0.842247	0	0	0	0	0	0	0	0	0	0	0	0.631685	0	0	0	0	0	4	1.89506	0.421124		Count	M	90	10	0	9.4984	9.4984	340.278	340.278	AUV	HD	NP	Kammu	S351-03	sentry.20151015.085231319429.1983.tif		Beatriz
1208	Image 42	0.210562	0.315843	0	0	0	0.105281	0	0	0	0	0	0	0	0	0	0	0	0	0	0	0	3	0.631685	0.315843		Count	M	95	5	0	9.4984	9.4984	339.466	339.466	AUV	HD	NP	Kammu	S351-03	sentry.20151015.085557982449.2045.tif		Beatriz
1209	Image 44	0.12739	0.764339	0	0	0	0	0	0	0	0	0	0	0	0	0	0	0	0	0	0	0	2	0.891729	0.25478		Count	Y	100	0	0	7.84992	7.84992	380.149	380.149	AUV	HD	NP	Kammu	S351-05	sentry.20151015.094034602525.2848.tif		Beatriz
1210	Image 24	0.105281	0.526404	0	0	0	0.105281	0	0	0	0	0	0	0	0	0	0.105281	0	0	0	0	0	4	0.842247	0.421124		Count	Y	98	0	2	9.4984	9.4984	366.383	366.383	AUV	HD	NP	Kammu	S351-05	sentry.20151015.094427931916.2918.tif		Beatriz
1211	Image 33	0.315843	0.210562	0	0	0	0	0	0	0	0	0.210562	0	0	0	0	0	0	0	0	0	0	3	0.736966	0.315843		Count	N	95	0	5	9.4984	9.4984	362.793	362.793	AUV	HD	NP	Kammu	S351-05	sentry.20151015.094714595644.2968.tif		Beatriz
1212	Image 19	0.210562	1.15809	0	0.105281	0	0	0	0	0	0	0.315843	0	0	0	0.105281	0	0	0	0	0	0	5	1.89506	0.526404		Count	Y	94	3	3	9.4984	9.4984	361.21	361.21	AUV	HD	NP	Kammu	S351-05	sentry.20151015.095054591854.3034.tif		Beatriz
1213	Image 37	1.05281	0.526404	0	0	0	0.105281	0	0	0	0	0	0	0	0	0	0	0	0	0	0	0	3	1.68449	0.315843		Count	Y	98	0	2	9.4984	9.4984	360.214	360.214	AUV	HD	NP	Kammu	S351-05	sentry.20151015.095201257501.3054.tif		Beatriz
1214	Image 49	0.105281	0	0	0.105281	0	0	0	0	0	0	0	0	0	0	0	0	0	0	0	0	0	2	0.210562	0.210562		Count	N	98	2	0	9.4984	9.4984	363.723	363.723	AUV	HD	NP	Kammu	S351-05	sentry.20151015.100721241715.3330.tif		Beatriz
1215	Image 1	0.105281	0	0	0	0	0	0	0	0	0	0	0	0	0	0	0	0	0	0	0	0.105281	2	0.210562	0.210562		Count	N	75	0	25	9.4984	9.4984	466.616	466.616	AUV	HD	NP	Kammu	S351-10	sentry.20151015.131640996426.6738.tif		Beatriz
1216	Image 41	0	0	0	0	0.12739	0	0	0	0	0	0	0	0	0	0	0	0	0	0	0	0	1	0.12739	0.12739		Count	N	70	0	30	7.84992	7.84992	465.573	465.573	AUV	HD	NP	Kammu	S351-10	sentry.20151015.131914329746.6784.tif		Beatriz
1217	Image 9	0.255833	0	0	0	0	0	0	0	0	0	0	0	0	0	0	0	0.0852775	0	0	0	0	2	0.34111	0.170555		Count	N	85	15	0	11.7264	11.7264	460.621	460.621	AUV	HD	NP	Kammu	S351-10	sentry.20151015.133200996345.7014.tif		Beatriz
1218	Image 17	0.105281	0	0	0	0	0	0	0	0	0	0.736966	0	0	0	0	0	0	0	0	0	0	2	0.842247	0.210562		Count	N	97	0	3	9.4984	9.4984	437.934	437.934	AUV	HD	NP	Kammu	S351-11	sentry.20151015.135050996246.7353.tif		Beatriz
1219	Image 47	0	0	0	0	0	0	0	0	0	0	1.78978	0	0	0	0	0	0	0	0	0	0	1	1.78978	0.105281		Count	N	85	15	0	9.4984	9.4984	437.561	437.561	AUV	HD	NP	Kammu	S351-11	sentry.20151015.135157662906.7373.tif		Beatriz
1220	Image 6	0	0	0	0	0	0	0	0	0	0	1.10861	0	0	0	0	0.0852775	0.0852775	0	0	0	0	3	1.27916	0.255833		Count	N	95	0	5	11.7264	11.7264	437.878	437.878	AUV	HD	NP	Kammu	S351-11	sentry.20151015.135257662901.7391.tif		Beatriz
1221	Image 18	0	0	0	0	0	0	0	0	0	0	2.38777	0	0	0	0	0	0	0	0	0	0	1	2.38777	0.0852775		Count	M	95	0	5	11.7264	11.7264	437.377	437.377	AUV	HD	NP	Kammu	S351-11	sentry.20151015.135457662891.7427.tif		Beatriz
1222	Image 27	0.0852775	0	0	0.0852775	0	0	0	0	0	0	0	0	0	0	0	0	0	0	0	0	0	2	0.170555	0.170555		Count	N	98	0	2	11.7264	11.7264	438.403	438.403	AUV	HD	NP	Kammu	S351-11	sentry.20151015.141157662801.7733.tif		Beatriz
1223	Image 25	0	0.736966	0	0	0	0	0	0	0	0	0	0	0	0	0	0	0	0	0	0	0	1	0.736966	0.105281		Count	Y	95	0	5	9.4984	9.4984	446.836	446.836	AUV	HD	NP	Kammu	S351-14	sentry.20151015.154310908678.9374.tif		Beatriz
1224	Image 39	0	0.34111	0	0	0	0	0	0	0	0	0	0	0	0	0	0	0	0	0	0	0	1	0.34111	0.0852775		Count	Y	90	0	10	11.7264	11.7264	440.735	440.735	AUV	HD	NP	Kammu	S351-14	sentry.20151015.154424240642.9396.tif		Beatriz
1225	Image 7	0	0.0852775	0	0	0	0	0	0	0	0	0	0	0	0	0	0	0	0	0	0	0	1	0.0852775	0.0852775		Count	N	95	0	5	11.7264	11.7264	438.753	438.753	AUV	HD	NP	Kammu	S351-14	sentry.20151015.155244232498.9546.tif		Beatriz
1226	Image 26	0	0	0	0	0	0	0	0	0	0	0	0	0	0	0	0.0852775	0	0	0	0	0	1	0.0852775	0.0852775		Count	N	97	0	3	11.7264	11.7264	439.058	439.058	AUV	HD	NP	Kammu	S351-14	sentry.20151015.155504230220.9588.tif		Beatriz
1227	Image 38	0	0.315843	0	0	0	0	0	0	0	0	0	0	0	0	0	0	0	0	0	0	0	1	0.315843	0.105281		Count	Y	100	0	0	9.4984	9.4984	422.883	422.883	AUV	HD	NP	Kammu	S351-14	sentry.20151015.160404221381.9750.tif		Beatriz
1228	Image 30	0	0.13476	0	0	0	0	0	0	0	0	0	0	0	0	0	0	0	0	0	0	0	1	0.13476	0.0673798		Count	M	95	0	5	14.8412	14.8412	422.776	422.776	AUV	HD	NP	Kammu	S351-14	sentry.20151015.160510887090.9770.tif		Beatriz
1229	Image 14	0	0	0	0	0	0	0.105281	0	0	0	0	0	0	0	0	0.105281	0	0	0	0	0	2	0.210562	0.210562		Count	N	40	30	30	9.4984	9.4984	589.288	589.288	AUV	HD	NP	Kammu	S351-29	sentry.20151016.013810357343.20084.tif		Beatriz
1230	Image 4	0	0	0	0	0.105281	0	0	0	0	0	0	0	0	0	0	0.210562	0	0	0	0	0	2	0.315843	0.210562		Count	N	85	10	5	9.4984	9.4984	587.226	587.226	AUV	HD	NP	Kammu	S351-29	sentry.20151016.015657007371.20422.tif		Beatriz
1231	Image 23	0	0	0	0	0	0	0	0	0	0	0	0	0	0	0	0.210562	0	0	0	0	0	1	0.210562	0.105281		Count	N	97	0	3	9.4984	9.4984	589.741	589.741	AUV	HD	NP	Kammu	S351-29	sentry.20151016.015923671992.20466.tif		Beatriz
1232	Image 2	0	0	0	0	0	0	0	0	0	0	0	0	0	0	0	0.105281	0	0	0	0	0	1	0.105281	0.105281		Count	M	85	15	0	9.4984	9.4984	586.17	586.17	AUV	HD	NP	Kammu	S351-29	sentry.20151016.020337001490.20542.tif		Beatriz
1233	Image 28	0	0	0	0	0.0852775	0	0	0	0	0	0	0	0	0	0	0	0	0	0	0	0	1	0.0852775	0.0852775		Count	N	98	0	2	11.7264	11.7264	619.555	619.555	AUV	HD	NP	Kammu	S351-33	sentry.20151016.041923550597.22986.tif		Beatriz
1234	Image 15	0	0	0	0	0	0	0	0	0	0	0	0	0	0	0	0.105281	0	0	0	0	0	1	0.105281	0.105281		Count	N	95	0	5	9.4984	9.4984	606.155	606.155	AUV	HD	NP	Kammu	S351-33	sentry.20151016.043550203156.23282.tif		Beatriz
1235	Image 14	0	0	0	0	0.105281	0	0	0	0	0	0	0	0	0	0	0	0	0	0	0	0	1	0.105281	0.105281		Count	N	90	0	10	9.4984	9.4984	587.513	587.513	AUV	HD	NP	Moku	S361-33	sentry.20151104.215833131713.20255.tif		Beatriz
1236	Image 7	0	0	0	0	0	0	0.105281	0	0	0	0	0	0	0	0	0	0	0	0	0	0	1	0.105281	0.105281		Count	N	50	0	50	9.4984	9.4984	588.142	588.142	AUV	HD	NP	Moku	S361-33	sentry.20151104.220959788789.20461.tif		Beatriz
1237	Image 27	0	0	0.105281	0	0	0	0	0	0	0	0	0	0	0	0	0	0	0	0	0	0	1	0.105281	0.105281		Count	N	25	0	75	9.4984	9.4984	587.831	587.831	AUV	HD	NP	Moku	S361-33	sentry.20151104.221106454466.20481.tif		Beatriz
1238	Image 29	0	0	0	0.12739	0.12739	0	0	0	0	0	0	0	0	0	0	0	0	0	0	0	0	2	0.25478	0.25478		Count	N	85	0	15	7.84992	7.84992	587.055	587.055	AUV	HD	NP	Moku	S361-33	sentry.20151104.221239786527.20509.tif		Beatriz
1239	Image 5	0	0	0	0	0	0	0	0	0	0	0.105281	0	0	0	0	0.105281	0	0	0	0	0	2	0.210562	0.210562		Count	N	60	0	40	9.4984	9.4984	590.464	590.464	AUV	HD	NP	Moku	S361-33	sentry.20151104.221806448552.20607.tif		Beatriz
1240	Image 31	0	0	0.105281	0	0	0	0	0	0	0	0	0	0	0	0	0	0	0	0	0	0	1	0.105281	0.105281		Count	N	95	0	5	9.4984	9.4984	589.932	589.932	AUV	HD	NP	Moku	S361-34	sentry.20151104.222316444167.20700.tif		Beatriz
1241	Image 42	0	0	0	0	0.315843	0	0	0	0	0	0	0	0	0	0	0.210562	0	0	0	0	0	2	0.526404	0.210562		Count	M	80	0	20	9.4984	9.4984	591.654	591.654	AUV	HD	NP	Moku	S361-34	sentry.20151104.222403110130.20714.tif		Beatriz
1242	Image 34	0.12739	0	0	0.12739	0	0	0	0	0	0	0	0	0	0	0	0	0	0	0	0	0	2	0.25478	0.25478		Count	N	20	0	80	7.84992	7.84992	591.344	591.344	AUV	HD	NP	Moku	S361-34	sentry.20151104.222629774811.20758.tif		Beatriz
1243	Image 6	0	0	0	0	0	0.315843	0	0	0	0	0	0	0	0	0	0	0	0	0	0	0	1	0.315843	0.105281		Count	N	75	0	25	9.4984	9.4984	590.358	590.358	AUV	HD	NP	Moku	S361-34	sentry.20151104.222743107030.20780.tif		Beatriz
1244	Image 12	0	0	0	0	0	0	0	0	0	0	0	0	0	0	0	0.105281	0	0	0	0	0	1	0.105281	0.105281		Count	N	95	0	5	9.4984	9.4984	591.25	591.25	AUV	HD	NP	Moku	S361-34	sentry.20151104.222943105354.20816.tif		Beatriz
1245	Image 22	0	0	0	0	0.105281	0	0	0	0	0	0	0	0	0	0	0	0	0	0	0	0	1	0.105281	0.105281		Count	N	95	0	5	9.4984	9.4984	587.623	587.623	AUV	HD	NP	Moku	S361-34	sentry.20151104.223356435148.20892.tif		Beatriz
1246	Image 38	0	0	0	0	0.210562	0.210562	0	0	0	0	0	0	0	0	0	0	0	0	0	0	0	2	0.421124	0.210562		Count	N	98	0	2	9.4984	9.4984	583.332	583.332	AUV	HD	NP	Moku	S361-34	sentry.20151104.223449767784.20908.tif		Beatriz
1247	Image 1	0	0	0	0	0	0.105281	0	0	0	0	0	0	0	0	0	0	0	0	0	0	0	1	0.105281	0.105281		Count	N	90	0	10	9.4984	9.4984	582.966	582.966	AUV	HD	NP	Moku	S361-34	sentry.20151104.223529767220.20920.tif		Beatriz
1248	Image 36	0	0	0	0	0.210562	0	0	0	0	0	0	0	0	0	0	0	0	0	0	0	0	1	0.210562	0.105281		Count	N	98	0	2	9.4984	9.4984	582.967	582.967	AUV	HD	NP	Moku	S361-34	sentry.20151104.223549766946.20926.tif		Beatriz
1249	Image 30	0	0	0	0	0	0	0.0852775	0	0	0	0	0	0	0	0	0.0852775	0	0	0	0	0	2	0.170555	0.170555		Count	N	95	0	5	11.7264	11.7264	584.068	584.068	AUV	HD	NP	Moku	S361-34	sentry.20151104.223749765251.20962.tif		Beatriz
1250	Image 24	0	0.105281	0	0	0	0	0	0	0	0	0	0	0	0	0	0.105281	0	0	0	0	0	2	0.210562	0.210562		Count	N	90	0	10	9.4984	9.4984	589.119	589.119	AUV	HD	NP	Moku	S361-34	sentry.20151104.223929763830.20992.tif		Beatriz
1251	Image 41	0	0	0	0	0.105281	0	0	0	0	0	0	0	0	0	0	0	0	0	0	0	0	1	0.105281	0.105281		Count	N	95	0	5	9.4984	9.4984	598.825	598.825	AUV	HD	NP	Moku	S361-34	sentry.20151104.224343093526.21068.tif		Beatriz
1252	Image 40	0	0	0	0	0.210562	0	0	0	0	0	0	0	0	0	0	0	0	0	0	0	0	1	0.210562	0.105281		Count	N	40	40	20	9.4984	9.4984	600.362	600.362	AUV	HD	NP	Moku	S361-34	sentry.20151104.224423092947.21080.tif		Beatriz
1253	Image 28	0	0	0	0.105281	0	0	0	0	0	0	0	0	0	0	0	0	0	0	0	0	0	1	0.105281	0.105281		Count	N	90	0	10	9.4984	9.4984	607.433	607.433	AUV	HD	NP	Moku	S361-35	sentry.20151104.225823081093.21332.tif		Beatriz
1254	Image 13	0.105281	0	0	0	0	0	0	0	0	0	0	0	0	0	0	0.315843	0	0	0	0	0	2	0.421124	0.210562		Count	N	90	0	10	9.4984	9.4984	606.565	606.565	AUV	HD	NP	Moku	S361-35	sentry.20151104.230149744952.21394.tif		Beatriz
1255	Image 50	0	0	0	0	0.105281	0	0	0	0	0	0.105281	0	0	0	0	0	0	0	0	0	0	2	0.210562	0.210562		Count	N	95	0	5	9.4984	9.4984	606.098	606.098	AUV	HD	NP	Moku	S361-35	sentry.20151104.230443075718.21446.tif		Beatriz
1256	Image 8	0	0	0	0	0	0.105281	0	0	0	0	0	0	0	0	0	0	0	0	0	0	0	1	0.105281	0.105281		Count	N	95	0	5	9.4984	9.4984	606.302	606.302	AUV	HD	NP	Moku	S361-35	sentry.20151104.230456408910.21450.tif		Beatriz
1257	Image 45	0	0	0	0.12739	0	0	0	0	0	0	0	0	0	0	0	0.12739	0	0	0	0	0	2	0.25478	0.25478		Count	N	95	0	5	7.84992	7.84992	612.517	612.517	AUV	HD	NP	Moku	S361-35	sentry.20151104.230743073177.21500.tif		Beatriz
1258	Image 33	0	0	0	0	0.25478	0	0	0	0	0	0	0	0	0	0	0	0	0	0	0	0.12739	2	0.38217	0.25478		Count	N	95	0	5	7.84992	7.84992	615.741	615.741	AUV	HD	NP	Moku	S361-35	sentry.20151104.230943071492.21536.tif		Beatriz
1259	Image 18	0	0	0	0	0.210562	0	0	0	0	0	0	0	0	0	0	0	0	0	0	0	0.105281	2	0.315843	0.210562		Count	N	90	0	10	9.4984	9.4984	615.957	615.957	AUV	HD	NP	Moku	S361-35	sentry.20151104.230949738158.21538.tif		Beatriz
1260	Image 19	0	0	0	0	0.105281	0	0	0	0	0	0	0	0	0	0	0	0	0	0	0	0	1	0.105281	0.105281		Count	N	95	0	5	9.4984	9.4984	622.336	622.336	AUV	HD	NP	Moku	S361-35	sentry.20151104.231216402718.21582.tif		Beatriz
1261	Image 47	0	0	0	0	0.105281	0	0	0	0	0	0	0	0	0	0	0	0	0	0	0	0	1	0.105281	0.105281		Count	N	95	0	5	9.4984	9.4984	622.837	622.837	AUV	HD	NP	Moku	S361-35	sentry.20151104.231223069250.21584.tif		Beatriz
1262	Image 48	0	0	0	0	0.25478	0	0	0	0	0	0	0	0	0	0	0	0	0	0	0	0	1	0.25478	0.12739		Count	N	90	0	10	7.84992	7.84992	639.892	639.892	AUV	HD	NP	Moku	S361-35	sentry.20151104.231656398770.21666.tif		Beatriz
1263	Image 21	0	0	0	0	0	0	0	0	0	0	0	0	0	0	0	0.105281	0	0	0	0	0	1	0.105281	0.105281		Count	N	87	3	10	9.4984	9.4984	588.773	588.773	AUV	HD	NP	Moku	S362-08	sentry.20151105.122814795621.4667.tif		Beatriz
1264	Image 23	0	0	0	0	0	0	0	0	0	0	0	0	0	0	0	0.105281	0	0	0	0	0	1	0.105281	0.105281		Count	N	50	0	50	9.4984	9.4984	586.514	586.514	AUV	HD	NP	Moku	S362-08	sentry.20151105.122848128393.4677.tif		Beatriz
1265	Image 43	0	0	0	0	0	0.105281	0	0	0	0	0	0	0	0	0	0	0	0	0	0	0	1	0.105281	0.105281		Count	N	80	0	20	9.4984	9.4984	582.212	582.212	AUV	HD	NP	Moku	S362-08	sentry.20151105.123434790326.4781.tif		Beatriz
1266	Image 46	0	0.210562	0	0	0	0	0	0	0	0	0	0	0	0	0	0.105281	0	0	0	0	0	2	0.315843	0.210562		Count	N	75	0	25	9.4984	9.4984	577.996	577.996	AUV	HD	NP	Moku	S362-08	sentry.20151105.124601447371.4987.tif		Beatriz
1267	Image 4	0.0852775	0	0.0852775	0	0	0	0	0	0	0	0	0	0	0	0	0	0	0	0	0	0	2	0.170555	0.170555		Count	N	25	0	75	11.7264	11.7264	584.668	584.668	AUV	HD	NP	Moku	S362-08	sentry.20151105.125134776073.5087.tif		Beatriz
1268	Image 44	0	0	0.210562	0	0.105281	0	0	0	0	0	0	0	0	0	0	0	0	0	0	0	0	2	0.315843	0.210562		Count	N	40	0	60	9.4984	9.4984	589.896	589.896	AUV	HD	NP	Moku	S362-10	sentry.20151105.132651412978.5722.tif		Beatriz
1269	Image 15	0	0.105281	0	0	0	0	0	0	0	0	0	0	0	0	0	0	0	0	0	0	0	1	0.105281	0.105281		Count	N	80	0	20	9.4984	9.4984	589.758	589.758	AUV	HD	NP	Moku	S362-10	sentry.20151105.132711412698.5728.tif		Beatriz
1270	Image 17	0.105281	0	0	0	0	0	0	0	0	0	0	0	0	0	0	0	0	0	0	0	0.105281	2	0.210562	0.210562		Count	N	25	0	75	9.4984	9.4984	592.062	592.062	AUV	HD	NP	Moku	S362-10	sentry.20151105.133744737229.5918.tif		Beatriz
1271	Image 16	0	0	0.105281	0	0	0	0	0	0	0	0	0	0	0	0	0	0	0	0	0	0	1	0.105281	0.105281		Count	N	25	0	75	9.4984	9.4984	595.361	595.361	AUV	HD	NP	Moku	S362-10	sentry.20151105.134304732757.6014.tif		Beatriz
1272	Image 3	0.105281	0	0	0.105281	0	0	0	0	0	0	0	0	0	0	0	0	0	0	0	0	0	2	0.210562	0.210562		Count	N	80	0	20	9.4984	9.4984	598.933	598.933	AUV	HD	NP	Moku	S362-10	sentry.20151105.134758061870.6102.tif		Beatriz
1273	Image 11	0	0	0	0	0	0.105281	0	0	0	0	0	0	0	0	0	0	0	0	0	0	0	1	0.105281	0.105281		Count	N	90	0	10	9.4984	9.4984	599.795	599.795	AUV	HD	NP	Moku	S362-10	sentry.20151105.134951393660.6136.tif		Beatriz
1274	Image 39	0.105281	0	0.105281	0	0	0	0	0	0	0	0	0	0	0	0	0	0	0	0	0	0	2	0.210562	0.210562		Count	N	20	0	80	9.4984	9.4984	600.052	600.052	AUV	HD	NP	Moku	S362-10	sentry.20151105.135231391414.6184.tif		Beatriz
1275	Image 25	0	0	0.105281	0	0	0	0	0	0	0	0	0	0	0	0	0	0	0	0	0	0	1	0.105281	0.105281		Count	N	50	0	50	9.4984	9.4984	600.269	600.269	AUV	HD	NP	Moku	S362-10	sentry.20151105.135238057942.6186.tif		Beatriz
1276	Image 37	0	0	0	0.105281	0	0	0	0	0	0	0	0	0	0	0	0.105281	0	0	0	0	0	2	0.210562	0.210562		Count	M	90	0	10	9.4984	9.4984	435.785	435.785	AUV	HD	NP	Moku	S362-22	sentry.20151105.195524408606.12714.tif		Beatriz
1277	Image 49	0	0	0	0.105281	0	0.105281	0	0	0	0	0	0	0	0	0	0	0	0	0	0	0	2	0.210562	0.210562		Count	N	80	0	20	9.4984	9.4984	438.755	438.755	AUV	HD	NP	Moku	S362-22	sentry.20151105.195717740148.12748.tif		Beatriz
1278	Image 2	0	0	0	0.105281	0	0	0	0	0	0	0	0	0	0	0	0	0	0	0	0	0	1	0.105281	0.105281		Count	N	50	0	50	9.4984	9.4984	440.222	440.222	AUV	HD	NP	Moku	S362-22	sentry.20151105.195844405592.12774.tif		Beatriz
1279	Image 32	0	0.13476	0	0	0	0	0	0	0	0	0	0	0	0	0	0	0	0	0	0	0	1	0.13476	0.0673798		Count	N	95	0	5	14.8412	14.8412	437.187	437.187	AUV	HD	NP	Moku	S362-22	sentry.20151105.201004395391.12978.tif		Beatriz
1280	Image 26	0	0	0	0.12739	0	0	0	0	0	0	0	0	0	0	0	0.12739	0	0	0	0	0	2	0.25478	0.25478		Count	N	90	0	10	7.84992	7.84992	438.879	438.879	AUV	HD	NP	Moku	S362-22	sentry.20151105.201037728160.12988.tif		Beatriz
1281	Image 20	0	0	0.105281	0.105281	0	0	0	0	0	0	0	0	0	0	0	0	0	0	0	0	0	2	0.210562	0.210562		Count	M	90	0	10	9.4984	9.4984	435.378	435.378	AUV	HD	NP	Moku	S362-22	sentry.20151105.201214393454.13016.tif		Beatriz
1282	Image 35	0	0.105281	0	0	0	0	0	0	0	0	0	0	0	0	0	0	0	0	0	0	0	1	0.105281	0.105281		Count	N	95	0	5	9.4984	9.4984	436.001	436.001	AUV	HD	NP	Moku	S362-22	sentry.20151105.201354391929.13046.tif		Beatriz
1283	SS200611_23_20929	1.68776	0.843882	0	0	0	0	0	0	0	1.68776	0.21097	0	0	0	0	0	0	0	0	0	0	4	4.43038	0.843882		count	y				4.74	4.74	1116	1116	towed cam	hi res	Southern Tasmanian Seamounts	Hill U	SS200611_23	SS200611_23_20929	CSIRO	Franzis Althaus	147.18
1284	SS200611_23_20934	4.46194	1.31234	0	0	0.787402	0	0.262467	0	0	4.72441	0	0	0	0	0	0	0	0	0	0	0.262467	6	11.811	1.5748		count	y				3.81	3.81	1122	1122	towed cam	hi res	Southern Tasmanian Seamounts	Hill U	SS200611_23	SS200611_23_20934	CSIRO	Franzis Althaus	147.18
1285	SS200611_23_20939	1.8648	0.4662	0	0	0.4662	0	1.3986	0	0	3.2634	0.4662	0	0	0	0	0.2331	0.4662	0	0	0	0.2331	9	8.85781	2.0979		count	y				4.29	4.29	1155	1155	towed cam	hi res	Southern Tasmanian Seamounts	Hill U	SS200611_23	SS200611_23_20939	CSIRO	Franzis Althaus	147.179
1286	SS200611_23_20940	1.69492	0.564972	0	0	0.847458	0	0	0	0	3.38983	0	0	0	0	0	0	0.282486	0	0	0	0.564972	6	7.34463	1.69492		count	?				3.54	3.54	1159	1159	towed cam	hi res	Southern Tasmanian Seamounts	Hill U	SS200611_23	SS200611_23_20940	CSIRO	Franzis Althaus	147.179
1287	SS200611_23_20942	0.423729	0	0	0	0	0	0	0	0	0.211864	0	0	0	0	0	0	0	0	0	0	0	2	0.635593	0.423729		count	?				4.72	4.72	1177	1177	towed cam	hi res	Southern Tasmanian Seamounts	Hill U	SS200611_23	SS200611_23_20942	CSIRO	Franzis Althaus	147.178
1288	SS200611_23_20957	0	0.230415	0	0	0	0	0	0	0	0	0	0	0	0	0	0.230415	0	0	0	0	0	2	0.460829	0.460829		count	n	99			4.34	4.34	1239	1239	towed cam	hi res	Southern Tasmanian Seamounts	Hill U	SS200611_23	SS200611_23_20957	CSIRO	Franzis Althaus	147.176
1289	SS200611_23_20958	0.38835	0.582524	0	0.194175	0.38835	0	0.38835	0	0	1.74757	0	0	0	0	0	0.38835	0.194175	0	0	0	0.38835	9	4.66019	1.74757		count	y				5.15	5.15	1239	1239	towed cam	hi res	Southern Tasmanian Seamounts	Hill U	SS200611_23	SS200611_23_20958	CSIRO	Franzis Althaus	147.176
1290	SS200611_23_20960	3.01508	0.753769	0	0	0.502513	0	0.251256	0	0	2.26131	0	0	0	0	0	0	0.502513	0	0	0	0	6	7.28643	1.50754		count	y				3.98	3.98	1242	1242	towed cam	hi res	Southern Tasmanian Seamounts	Hill U	SS200611_23	SS200611_23_20960	CSIRO	Franzis Althaus	147.176
1291	SS200611_23_20962	0.767263	0	0	0	0.767263	0	0	0	0	2.04604	0.255754	0	0	0	0	0	0	0	0	0	0	4	3.83632	1.02302		count	?				3.91	3.91	1247	1247	towed cam	hi res	Southern Tasmanian Seamounts	Hill U	SS200611_23	SS200611_23_20962	CSIRO	Franzis Althaus	147.176
1292	SS200611_23_20969	0.582524	0.194175	0	0	0.194175	0.194175	0	0	0	6.99029	0	0	0	0	0	0	0.582524	0	0	0	0.776699	7	9.51456	1.35922		count	?				5.15	5.15	1292	1292	towed cam	hi res	Southern Tasmanian Seamounts	Hill U	SS200611_23	SS200611_23_20969	CSIRO	Franzis Althaus	147.174
1293	SS200611_23_20990	0	0	0	0	0.197628	0.197628	0	0	0	0.197628	0	0	0	0	0	0	0	0	0	0	0	3	0.592885	0.592885		count	n	100			5.06	5.06	1370	1370	towed cam	hi res	Southern Tasmanian Seamounts	Hill U	SS200611_23	SS200611_23_20990	CSIRO	Franzis Althaus	147.171
1294	SS200611_23_20991	0	0	0	0	0	0.222717	0	0	0	0	0	0	0	0	0	0	0	0	0	0	0	1	0.222717	0.222717		count	n	100			4.49	4.49	1375	1375	towed cam	hi res	Southern Tasmanian Seamounts	Hill U	SS200611_23	SS200611_23_20991	CSIRO	Franzis Althaus	147.171
1295	SS200611_23_20993	0	0	0	0	0.484262	0	0.242131	0	0	0.242131	0	0	0	0	0	0	0	0	0	0	0.242131	4	1.21065	0.968523		count	n	100			4.13	4.13	1396	1396	towed cam	hi res	Southern Tasmanian Seamounts	Hill U	SS200611_23	SS200611_23_20993	CSIRO	Franzis Althaus	147.171
1296	SS200611_23_20994	0	0	0	0	0	0	0	0	0	0	0	0	0	0	0	0	0	0	0	0	0.207039	1	0.207039	0.207039		count	n	100			4.83	4.83	1395	1395	towed cam	hi res	Southern Tasmanian Seamounts	Hill U	SS200611_23	SS200611_23_20994	CSIRO	Franzis Althaus	147.171
1297	SS200611_23_20997	0	0.373832	0	0	0.186916	0	0.186916	0	0	0.186916	0	0	0	0	0	0	0.373832	0	0	0	0.373832	6	1.68224	1.1215		count	n	100			5.35	5.35	1413	1413	towed cam	hi res	Southern Tasmanian Seamounts	Hill U	SS200611_23	SS200611_23_20997	CSIRO	Franzis Althaus	147.17
1298	SS200611_27_21322	2.57937	0.198413	0	0	0.595238	0	0.396825	0	0	4.96032	0.198413	0	0	0	0	0.198413	0	0	0	0	0	7	9.12698	1.38889		count	y				5.04	5.04	1101	1101	towed cam	hi res	Southern Tasmanian Seamounts	Hill U	SS200611_27	SS200611_27_21322	CSIRO	Franzis Althaus	147.18
1299	SS200611_27_21323	1.10092	0.366972	0	0	0	0	0	0	0	0	0	0	0	0	0	0	0	0	0	0	0	2	1.46789	0.366972		count	y				5.45	5.45	1102	1102	towed cam	hi res	Southern Tasmanian Seamounts	Hill U	SS200611_27	SS200611_27_21323	CSIRO	Franzis Althaus	147.18
1300	SS200611_27_21331	1	0.6	0	0	0	0	0	0	0	0.8	0	0	0	0	0	0	0	0	0	0	0.2	4	2.6	0.8		count	y				5	5	1113	1113	towed cam	hi res	Southern Tasmanian Seamounts	Hill U	SS200611_27	SS200611_27_21331	CSIRO	Franzis Althaus	147.18
1301	SS200611_27_21336	1.49254	0.995025	0	0	0	0	0	0	0	0	0	0	0	0	0	0	0	0	0	0	0	2	2.48756	0.497512		count	y				4.02	4.02	1117	1117	towed cam	hi res	Southern Tasmanian Seamounts	Hill U	SS200611_27	SS200611_27_21336	CSIRO	Franzis Althaus	147.18
1302	SS200611_27_21339	0.224719	3.82022	0	0	0	0	0	0	0	2.02247	0.224719	0	0	0	0	0	0.224719	0	0	0	0.224719	6	6.74157	1.34831		count	y				4.45	4.45	1124	1124	towed cam	hi res	Southern Tasmanian Seamounts	Hill U	SS200611_27	SS200611_27_21339	CSIRO	Franzis Althaus	147.18
1303	SS200611_27_21345	1.74129	4.72637	0	0	0.497512	0	0.497512	0	0	1.74129	0	0	0	0	0	0	0	0	0	0	0.248756	6	9.45274	1.49254		count	y				4.02	4.02	1138	1138	towed cam	hi res	Southern Tasmanian Seamounts	Hill U	SS200611_27	SS200611_27_21345	CSIRO	Franzis Althaus	147.18
1304	SS200611_27_21361	3.98323	3.3543	0	0	0.628931	0	0.209644	0	0	6.07966	0.628931	0	0	0	0	0	0	0	0	0	0	6	14.8847	1.25786		count	y				4.77	4.77	1161	1161	towed cam	hi res	Southern Tasmanian Seamounts	Hill U	SS200611_27	SS200611_27_21361	CSIRO	Franzis Althaus	147.179
1305	SS200611_27_21364	1.85185	1.85185	0	0	0	0.205761	0	0	0	0	0.205761	0	0	0	0	0	0	0	0	0	0	4	4.11523	0.823045		count	y				4.86	4.86	1165	1165	towed cam	hi res	Southern Tasmanian Seamounts	Hill U	SS200611_27	SS200611_27_21364	CSIRO	Franzis Althaus	147.179
1306	SS200611_27_21369	1.42518	1.18765	0	0	0.475059	0.23753	0.475059	0	0	0.475059	0.23753	0	0	0	0	0.23753	0	0	0	0	0.712589	9	5.46318	2.13777		count	y				4.21	4.21	1169	1169	towed cam	hi res	Southern Tasmanian Seamounts	Hill U	SS200611_27	SS200611_27_21369	CSIRO	Franzis Althaus	147.179
1307	SS200611_27_21372	1.54143	4.81696	0	0	1.34875	0.385356	0.192678	0	0	3.08285	0	0	0	0	0	0.192678	0	0	0	0	0.385356	8	11.9461	1.54143		count	y				5.19	5.19	1178	1178	towed cam	hi res	Southern Tasmanian Seamounts	Hill U	SS200611_27	SS200611_27_21372	CSIRO	Franzis Althaus	147.179
1308	SS200611_27_21378	0.408163	1.83673	0	0	1.02041	0	0	0	0	1.22449	0	0	0	0	0	0	0	0	0	0	0	4	4.4898	0.816327		count	y				4.9	4.9	1199	1199	towed cam	hi res	Southern Tasmanian Seamounts	Hill U	SS200611_27	SS200611_27_21378	CSIRO	Franzis Althaus	147.179
1309	SS200611_27_21383	1.76322	22.1662	0	0	1.51134	0	0	0	0	2.267	0	0	0	0	0	0	0	0	0	0	0.251889	5	27.9597	1.25945		count	y				3.97	3.97	1203	1203	towed cam	hi res	Southern Tasmanian Seamounts	Hill U	SS200611_27	SS200611_27_21383	CSIRO	Franzis Althaus	147.179
1310	SS200611_27_21397	0.902935	0.225734	0	0	0	0	0	0	0	0	0.225734	0	0	0	0	0	0	0	0	0	0	3	1.3544	0.677201		count	y				4.43	4.43	1246	1246	towed cam	hi res	Southern Tasmanian Seamounts	Hill U	SS200611_27	SS200611_27_21397	CSIRO	Franzis Althaus	147.179
1311	SS200611_27_21406	1.37615	0	0	0	2.98165	0	0.229358	0	0	3.21101	0	0	0	0	0	0	1.14679	0	0	0	0	5	8.94495	1.14679		count	y				4.36	4.36	1283	1283	towed cam	hi res	Southern Tasmanian Seamounts	Hill U	SS200611_27	SS200611_27_21406	CSIRO	Franzis Althaus	147.179
1312	SS200611_27_21409	0.864553	0.288184	0	0	0	0	0	0	0	6.34006	0	0	0	0	0	0	0	0	0	0	0	3	7.4928	0.864553		count	y				3.47	3.47	1286	1286	towed cam	hi res	Southern Tasmanian Seamounts	Hill U	SS200611_27	SS200611_27_21409	CSIRO	Franzis Althaus	147.179
1313	SS200611_27_21410	1.15607	0.192678	0	0	1.54143	0	0.385356	0	0	3.46821	0	0	0	0	0	0	0.192678	0	0	0	0	6	6.93642	1.15607		count	y				5.19	5.19	1289	1289	towed cam	hi res	Southern Tasmanian Seamounts	Hill U	SS200611_27	SS200611_27_21410	CSIRO	Franzis Althaus	147.179
1314	SS200611_27_21418	0	0	0	0	0	0	0	0	0	0.404858	0	0	0	0	0	0	0	0	0	0	0	1	0.404858	0.202429		count	n	90			4.94	4.94	1322	1322	towed cam	hi res	Southern Tasmanian Seamounts	Hill U	SS200611_27	SS200611_27_21418	CSIRO	Franzis Althaus	147.178
1315	SS200611_27_21424	0	0	0	0	0	0	0	0	0	0.45045	0	0	0	0	0	0	0	0	0	0	0	1	0.45045	0.225225		count	n		95	5	4.44	4.44	1323	1323	towed cam	hi res	Southern Tasmanian Seamounts	Hill U	SS200611_27	SS200611_27_21424	CSIRO	Franzis Althaus	147.178
1316	SS200611_27_21425	0	0	0	0	0	0	0	0	0	1.62602	0	0	0	0	0	0	0	0	0	0	0	1	1.62602	0.271003		count	n		95	5	3.69	3.69	1320	1320	towed cam	hi res	Southern Tasmanian Seamounts	Hill U	SS200611_27	SS200611_27_21425	CSIRO	Franzis Althaus	147.178
1317	SS200611_38_22302	1.0101	2.77778	0	0	0	0	0.252525	0	0	0.757576	0.252525	0	0	0	0	0	0	0	0	0	0	5	5.05051	1.26263		count	y				3.96	3.96	1155	1155	towed cam	hi res	Southern Tasmanian Seamounts	Hill U	SS200611_38	SS200611_38_22302	CSIRO	Franzis Althaus	147.182
1318	SS200611_38_22304	1.08992	5.99455	0	0	0.544959	0	2.45232	0	0	2.99728	0.27248	0	0	0	0	0.27248	0	0	0	0	0.817439	8	14.4414	2.17984		count	y				3.67	3.67	1158	1158	towed cam	hi res	Southern Tasmanian Seamounts	Hill U	SS200611_38	SS200611_38_22304	CSIRO	Franzis Althaus	147.182
1319	SS200611_38_22308	1.7316	4.11255	0	0	0.649351	0	0.4329	0	0	1.51515	0	0	0	0	0	0	0	0	0	0	0	5	8.44156	1.08225		count	y				4.62	4.62	1164	1164	towed cam	hi res	Southern Tasmanian Seamounts	Hill U	SS200611_38	SS200611_38_22308	CSIRO	Franzis Althaus	147.183
1320	SS200611_38_22323	0.209644	0.419287	0	0.419287	1.25786	0	0.209644	0	0	3.14465	0	0	0	0	0	0	0	0	0	0	0	6	5.66038	1.25786		count	y				4.77	4.77	1195	1195	towed cam	hi res	Southern Tasmanian Seamounts	Hill U	SS200611_38	SS200611_38_22323	CSIRO	Franzis Althaus	147.184
1321	SS200611_38_22327	3.02419	1.20968	0	0	0.806452	0	0.403226	0	0	1.81452	0.403226	0	0	0	0	0	0.201613	0	0	0	0.604839	8	8.46774	1.6129		count	y				4.96	4.96	1206	1206	towed cam	hi res	Southern Tasmanian Seamounts	Hill U	SS200611_38	SS200611_38_22327	CSIRO	Franzis Althaus	147.185
1322	SS200611_38_22334	0	1.00402	0	0	0.803213	0	0.60241	0	0	2.00803	0.200803	0	0	0	0	0.200803	0.401606	0	0	0	0	7	5.22088	1.40562		count	y			10	4.98	4.98	1217	1217	towed cam	hi res	Southern Tasmanian Seamounts	Hill U	SS200611_38	SS200611_38_22334	CSIRO	Franzis Althaus	147.185
1323	SS200611_38_22342	3.06407	1.67131	0	0	2.22841	0	0.278552	0	0	4.45682	0	0	0	0	0.278552	0	0	0	0	0	0	6	11.9777	1.67131		count	y				3.59	3.59	1242	1242	towed cam	hi res	Southern Tasmanian Seamounts	Hill U	SS200611_38	SS200611_38_22342	CSIRO	Franzis Althaus	147.187
1324	SS200611_38_22344	1.1236	0.224719	0	0	0	0	0	0	0	3.82022	0	0	0	0	0	0	0.449438	0	0	0	0	4	5.61798	0.898876		count	n			40	4.45	4.45	1247	1247	towed cam	hi res	Southern Tasmanian Seamounts	Hill U	SS200611_38	SS200611_38_22344	CSIRO	Franzis Althaus	147.187
1325	SS200611_38_22354	0	0.211416	0	0	0	0	0	0	0	2.32558	0	0	0	0	0	0	0	0	0	0	0.422833	3	2.95983	0.634249		count	n	97			4.73	4.73	1287	1287	towed cam	hi res	Southern Tasmanian Seamounts	Hill U	SS200611_38	SS200611_38_22354	CSIRO	Franzis Althaus	147.188
1326	SS200611_38_22355	0	0	0	0	0.277778	0	0	0	0	0	0	0	0	0	0	0	0	0	0	0	0	1	0.277778	0.277778		count	n	100			3.6	3.6	1288	1288	towed cam	hi res	Southern Tasmanian Seamounts	Hill U	SS200611_38	SS200611_38_22355	CSIRO	Franzis Althaus	147.188
1327	SS200611_38_22359	0	0	0	0	0.421941	0	0	0	0	3.37553	0	0	0	0	0	0	0	0	0	0	0	2	3.79747	0.421941		count	n			20	4.74	4.74	1308	1308	towed cam	hi res	Southern Tasmanian Seamounts	Hill U	SS200611_38	SS200611_38_22359	CSIRO	Franzis Althaus	147.189
1328	SS200611_38_22363	0	0	0	0	0.25	0	0	0	0	0	0	0	0	0	0	0.25	0	0	0	0	0	2	0.5	0.5		count	n	60		40	4	4	1325	1325	towed cam	hi res	Southern Tasmanian Seamounts	Hill U	SS200611_38	SS200611_38_22363	CSIRO	Franzis Althaus	147.19
1329	SS200611_38_22364	0	0.273224	0	0	0	0.273224	0	0	0	0	0	0	0	0	0	0	0	0	0	0	0	2	0.546448	0.546448		count	n	80		20	3.66	3.66	1326	1326	towed cam	hi res	Southern Tasmanian Seamounts	Hill U	SS200611_38	SS200611_38_22364	CSIRO	Franzis Althaus	147.19
1330	SS200611_38_22365	0	0	0	0.285714	0	0	0	0	0	0	0	0	0	0	0	0	0	0	0	0	0	1	0.285714	0.285714		count	n	90		10	3.5	3.5	1330	1330	towed cam	hi res	Southern Tasmanian Seamounts	Hill U	SS200611_38	SS200611_38_22365	CSIRO	Franzis Althaus	147.19
1331	SS200611_38_22371	0	0.2849	0	0	0	0	0	0	0	0	0	0	0	0	0	0.2849	0	0	0	0	0	2	0.569801	0.569801		count	n	80		20	3.51	3.51	1358	1358	towed cam	hi res	Southern Tasmanian Seamounts	Hill U	SS200611_38	SS200611_38_22371	CSIRO	Franzis Althaus	147.191
